# Supplementary material for: Massive overlap of soil-borne fungal pathogens and developed countries
Source: Research Square preprint supplement (doi:10.21203/rs.3.rs-7011517/v1), 2025-07-08
Supplement: Supplementary file 1 [file 1a0a278c6f23c0145b33011d.pdf]

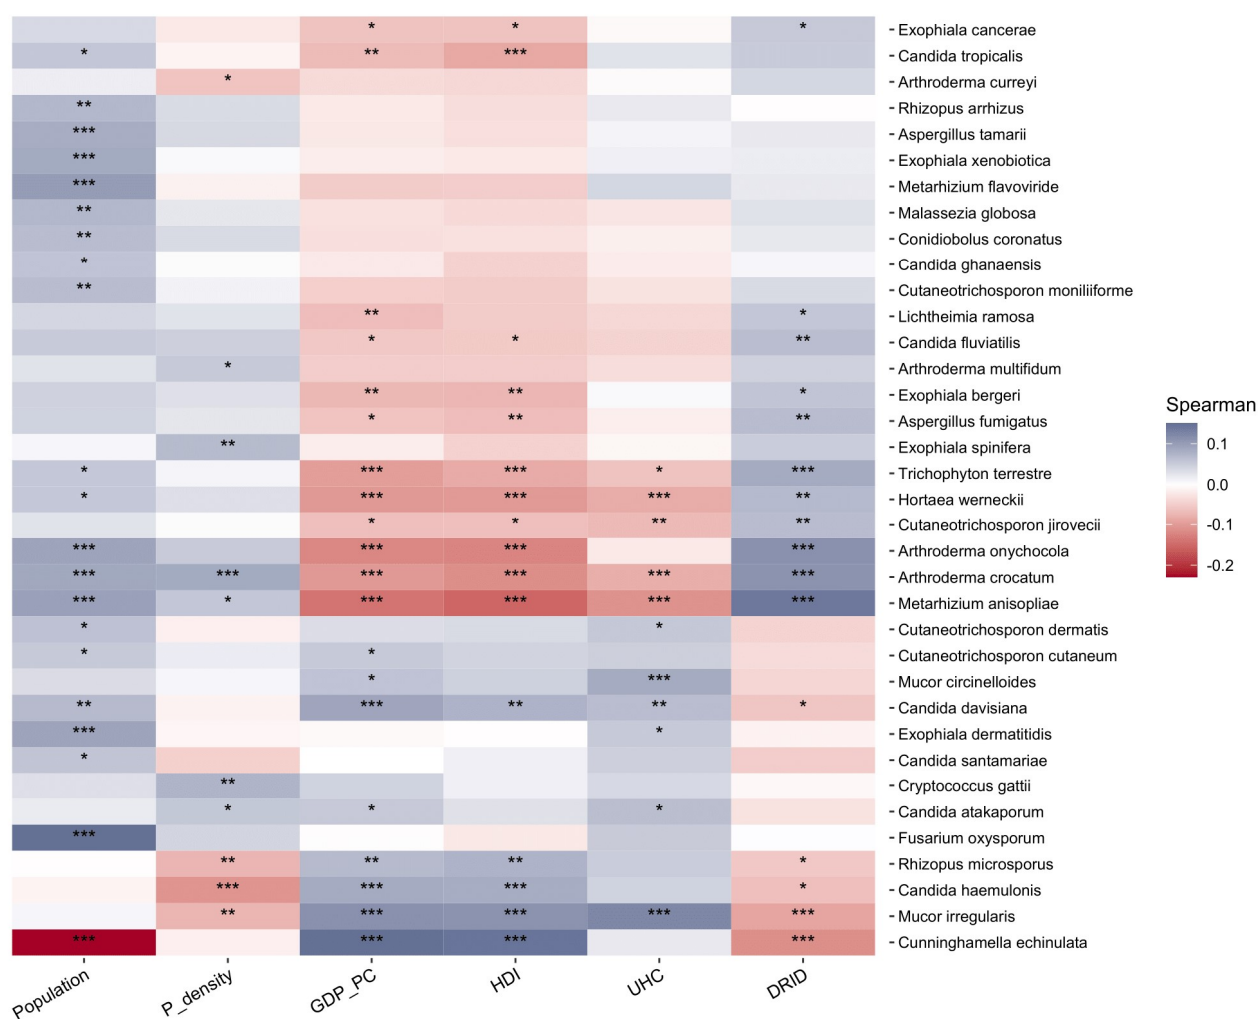

**Figure S3. Socio-economic correlations with the relative abundance of pathogenic fungal species.** Spearman correlation coefficients (color scale) between the relative abundance of 40 globally distributed soil-borne fungal pathogens and six socio-economic variables. Asterisks denote significance ( $p < 0.05$ ,  $p < 0.01$ ,  $p < 0.001$ ).
