# Supplementary material for: Massive overlap of soil-borne fungal pathogens and developed countries
Source: Research Square preprint supplement (doi:10.21203/rs.3.rs-7011517/v1), 2025-07-08
Supplement: Supplementary file 1 [file 462cd4e2a74817a2e50d58ad.xlsx]

## Sheet: Pathogenic_Fungi_RandomForest_P
Specie	Comparison	Group	Method	Mean_Rel_Abund	MeanDecreaseGini	P.unadj	P.adj	Significance
Aspergillus tamarii	Arid - Continental - Polar/Montane - Temperate - Tropical	Arid	Kruskal-Wallis rank sum test & Random Forest	0.0542976	15.9622	7.26309e-09	8.65519e-08	***
Malassezia restricta	Arid - Continental - Polar/Montane - Temperate - Tropical	Arid	Kruskal-Wallis rank sum test & Random Forest	0.0297097	6.61877	1.13195e-08	1.24515e-07	***
Metarhizium flavoviride	Arid - Continental - Polar/Montane - Temperate - Tropical	Arid	Kruskal-Wallis rank sum test & Random Forest	0.0285301	13.6682	1.19959e-14	1.90602e-13	***
Arthroderma crocatum	Arid - Continental - Polar/Montane - Temperate - Tropical	Arid	Kruskal-Wallis rank sum test & Random Forest	0.013813	10.3531	3.14163e-16	5.61567e-15	***
Candida fluviatilis	Arid - Continental - Polar/Montane - Temperate - Tropical	Arid	Kruskal-Wallis rank sum test & Random Forest	0.0110294	2.60817	4.65947e-05	0.000266522	***
Malassezia sympodialis	Arid - Continental - Polar/Montane - Temperate - Tropical	Arid	Kruskal-Wallis rank sum test & Random Forest	0.00882353	1.08933	5.88014e-05	0.000323408	***
Arthroderma curreyi	Arid - Continental - Polar/Montane - Temperate - Tropical	Arid	Kruskal-Wallis rank sum test & Random Forest	0.00735294	1.4634	0.0164172	0.0489096	*
Cryptococcus gattii	Arid - Continental - Polar/Montane - Temperate - Tropical	Arid	Kruskal-Wallis rank sum test & Random Forest	0.00735294	3.80349	0.0069464	0.0220741	*
Exophiala cancerae	Arid - Continental - Polar/Montane - Temperate - Tropical	Arid	Kruskal-Wallis rank sum test & Random Forest	0.00735294	2.35667	6.42833e-06	4.59626e-05	***
Candida alimentaria	Arid - Continental - Polar/Montane - Temperate - Tropical	Arid	Kruskal-Wallis rank sum test & Random Forest	0.00275735	0.73079	8.3583e-08	7.47023e-07	***
Candida pseudolambica	Arid - Continental - Polar/Montane - Temperate - Tropical	Arid	Kruskal-Wallis rank sum test & Random Forest	0.00147059	0.903777	0.000685675	0.00297126	**
Cutaneotrichosporon guehoae	Arid - Continental - Polar/Montane - Temperate - Tropical	Arid	Kruskal-Wallis rank sum test & Random Forest	0.00147059	0.218453	0.000685675	0.00297126	**
Candida pseudohaemulonii	Arid - Continental - Polar/Montane - Temperate - Tropical	Arid	Kruskal-Wallis rank sum test & Random Forest	0.000113122	0.558829	0.000685675	0.00297126	**
Cunninghamella echinulata	Arid - Continental - Polar/Montane - Temperate - Tropical	Continental	Kruskal-Wallis rank sum test & Random Forest	0.303756	67.6897	1.61109e-71	2.30385e-69	***
Fusarium oxysporum	Arid - Continental - Polar/Montane - Temperate - Tropical	Polar/Montane	Kruskal-Wallis rank sum test & Random Forest	0.209982	33.9464	7.31879e-14	1.04659e-12	***
Candida haemulonis	Arid - Continental - Polar/Montane - Temperate - Tropical	Polar/Montane	Kruskal-Wallis rank sum test & Random Forest	0.0539641	8.7462	6.46533e-22	1.5409e-20	***
Mucor ramosissimus	Arid - Continental - Polar/Montane - Temperate - Tropical	Polar/Montane	Kruskal-Wallis rank sum test & Random Forest	0.0468527	6.96117	1.40088e-07	1.17839e-06	***
Rhizopus microsporus	Arid - Continental - Polar/Montane - Temperate - Tropical	Polar/Montane	Kruskal-Wallis rank sum test & Random Forest	0.0271098	4.64238	0.00162321	0.00584907	**
Mucor irregularis	Arid - Continental - Polar/Montane - Temperate - Tropical	Polar/Montane	Kruskal-Wallis rank sum test & Random Forest	0.0250891	6.43729	1.2672e-05	8.62906e-05	***
Malassezia globosa	Arid - Continental - Polar/Montane - Temperate - Tropical	Polar/Montane	Kruskal-Wallis rank sum test & Random Forest	0.0147392	5.32653	0.000552939	0.00263567	**
Candida oregonensis	Arid - Continental - Polar/Montane - Temperate - Tropical	Polar/Montane	Kruskal-Wallis rank sum test & Random Forest	0.00680272	0.755011	0.00136103	0.00512176	**
Lichtheimia ornata	Arid - Continental - Polar/Montane - Temperate - Tropical	Polar/Montane	Kruskal-Wallis rank sum test & Random Forest	0.00286488	2.52232	0.00102284	0.00417902	**
Trichosporon aquatile	Arid - Continental - Polar/Montane - Temperate - Tropical	Polar/Montane	Kruskal-Wallis rank sum test & Random Forest	0.000485909	0.377302	0.00136103	0.00512176	**
Arthroderma ciferrii	Arid - Continental - Polar/Montane - Temperate - Tropical	Polar/Montane	Kruskal-Wallis rank sum test & Random Forest	0.00029577	0.201859	0.00136103	0.00512176	**
Fusarium solani	Arid - Continental - Polar/Montane - Temperate - Tropical	Temperate	Kruskal-Wallis rank sum test & Random Forest	0.266282	35.6493	0.000143898	0.000734909	***
Mucor circinelloides	Arid - Continental - Polar/Montane - Temperate - Tropical	Temperate	Kruskal-Wallis rank sum test & Random Forest	0.182451	22.7973	3.16756e-06	2.384e-05	***
Candida santamariae	Arid - Continental - Polar/Montane - Temperate - Tropical	Temperate	Kruskal-Wallis rank sum test & Random Forest	0.0211793	16.3211	4.06531e-30	2.9067e-28	***
Exophiala dermatitidis	Arid - Continental - Polar/Montane - Temperate - Tropical	Temperate	Kruskal-Wallis rank sum test & Random Forest	0.013244	14.2185	2.97263e-23	1.06272e-21	***
Hortaea werneckii	Arid - Continental - Polar/Montane - Temperate - Tropical	Temperate	Kruskal-Wallis rank sum test & Random Forest	0.00799182	5.05878	4.4882e-08	4.27875e-07	***
Cutaneotrichosporon dermatis	Arid - Continental - Polar/Montane - Temperate - Tropical	Temperate	Kruskal-Wallis rank sum test & Random Forest	0.00277639	3.85183	1.26925e-06	1.00835e-05	***
Cutaneotrichosporon cutaneum	Arid - Continental - Polar/Montane - Temperate - Tropical	Temperate	Kruskal-Wallis rank sum test & Random Forest	0.00261995	1.69131	0.00300671	0.00999905	**
Metarhizium anisopliae	Arid - Continental - Polar/Montane - Temperate - Tropical	Tropical	Kruskal-Wallis rank sum test & Random Forest	0.174063	29.2896	1.28205e-22	3.66665e-21	***
Candida tropicalis	Arid - Continental - Polar/Montane - Temperate - Tropical	Tropical	Kruskal-Wallis rank sum test & Random Forest	0.0427454	15.771	2.28707e-19	4.67215e-18	***
Aspergillus fumigatus	Arid - Continental - Polar/Montane - Temperate - Tropical	Tropical	Kruskal-Wallis rank sum test & Random Forest	0.0236692	9.76463	5.07368e-10	6.59578e-09	***
Cutaneotrichosporon moniliiforme	Arid - Continental - Polar/Montane - Temperate - Tropical	Tropical	Kruskal-Wallis rank sum test & Random Forest	0.0224531	8.38564	2.32548e-08	2.37531e-07	***
Arthroderma onychocola	Arid - Continental - Polar/Montane - Temperate - Tropical	Tropical	Kruskal-Wallis rank sum test & Random Forest	0.0212788	13.8873	7.51959e-28	3.58434e-26	***
Mucor hiemalis	Arid - Continental - Polar/Montane - Temperate - Tropical	Tropical	Kruskal-Wallis rank sum test & Random Forest	0.0181429	9.09373	0.000377336	0.00186066	**
Candida ghanaensis	Arid - Continental - Polar/Montane - Temperate - Tropical	Tropical	Kruskal-Wallis rank sum test & Random Forest	0.0153027	5.19465	1.84602e-05	0.000119991	***
Exophiala bergeri	Arid - Continental - Polar/Montane - Temperate - Tropical	Tropical	Kruskal-Wallis rank sum test & Random Forest	0.0101332	5.87898	2.50101e-05	0.000149019	***
Rhizopus arrhizus	Arid - Continental - Polar/Montane - Temperate - Tropical	Tropical	Kruskal-Wallis rank sum test & Random Forest	0.00841952	6.14231	0.00102074	0.00417902	**
Aspergillus nidulans	Arid - Continental - Polar/Montane - Temperate - Tropical	Tropical	Kruskal-Wallis rank sum test & Random Forest	0.00740583	3.15162	7.2761e-05	0.000385364	***
Lichtheimia ramosa	Arid - Continental - Polar/Montane - Temperate - Tropical	Tropical	Kruskal-Wallis rank sum test & Random Forest	0.00539725	3.66556	0.00238874	0.00813308	**
Trichophyton terrestre	Arid - Continental - Polar/Montane - Temperate - Tropical	Tropical	Kruskal-Wallis rank sum test & Random Forest	0.00334882	4.11356	2.18331e-05	0.000135745	***
Lichtheimia corymbifera	Arid - Continental - Polar/Montane - Temperate - Tropical	Tropical	Kruskal-Wallis rank sum test & Random Forest	0.00325308	1.65868	0.00417463	0.0135676	*
Candida metapsilosis	Arid - Continental - Polar/Montane - Temperate - Tropical	Tropical	Kruskal-Wallis rank sum test & Random Forest	0.00267376	1.10153	0.0144224	0.0440654	*
Cutaneotrichosporon jirovecii	Arid - Continental - Polar/Montane - Temperate - Tropical	Tropical	Kruskal-Wallis rank sum test & Random Forest	0.00219207	1.68259	0.0016361	0.00584907	**
Candida quercitrusa	Arid - Continental - Polar/Montane - Temperate - Tropical	Tropical	Kruskal-Wallis rank sum test & Random Forest	0.00140878	2.07698	0.014483	0.0440654	*
Trichosporon asteroides	Arid - Continental - Polar/Montane - Temperate - Tropical	Tropical	Kruskal-Wallis rank sum test & Random Forest	0.000322115	1.28198	0.00213211	0.00743637	**
