# Supplementary material for: Massive overlap of soil-borne fungal pathogens and developed countries
Source: Research Square preprint supplement (doi:10.21203/rs.3.rs-7011517/v1), 2025-07-08
Supplement: Supplementary file 2 [file 5a00fe9ed251af1265737540.pdf]

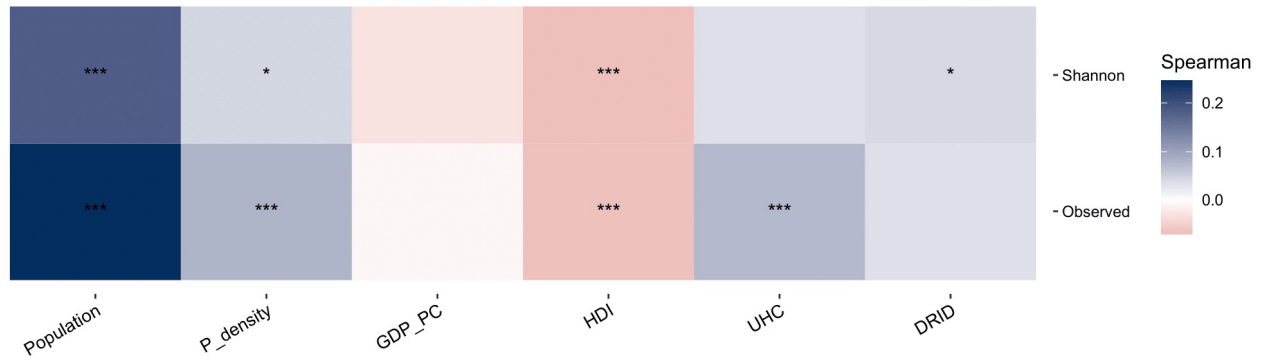

**Figure S2. Correlations between fungal pathogen diversity and socio-economic indicators.** Spearman correlation coefficients (color scale) between fungal pathogen alpha diversity measured as Shannon index and observed species richness and six socio-economic variables across global soil samples ( $n = 3,200$ ). Asterisks denote significance levels ( $p < 0.05$ ,  $p < 0.01$ ,  $p < 0.001$ ). Pathogen diversity is positively associated with population size and density, and negatively correlated with GDP per capita and Human Development Index (HDI).
