# Supplementary material for: Massive overlap of soil-borne fungal pathogens and developed countries
Source: Research Square preprint supplement (doi:10.21203/rs.3.rs-7011517/v1), 2025-07-08
Supplement: Supplementary file 2 [file 609d48eead64550c098b426f.xlsx]

## Sheet: Foglio1
Sample	Latitude	Longitude	Continent	Geo_Area	Biome	Climate	MAT	MDR	PSEA	AI	HII	Sand_%	Soil_pH	SOC	Plant_cover	Terrein_slope	Elevation	UV_light	TSEA	MAP	PET
Sample333	31.64	-7.13	Africa	Morocco:Ait Malek	shrubland: temperate shrubland biome	Arid	14.1083	12.55	57.8669	0.2574	10	32.3	7.1	328	22.0892	9.93579	1507	8.88889	656.533	508	1973
Sample334	31.47	-7.41	Africa	Morocco:Toufliht	forest: mediterranean forest biome	Arid	13.6583	11.45	57.9269	0.2552	18	39.1	6.5	859	25.8029	12.7921	1606	9.40131	635.377	493	1931
Sample335	31.51	-9.65	Africa	Morocco:Essouira	shrubland: temperate shrubland biome	Arid	18.3	9.61667	81.1999	0.1749	26	40.1	7.3	244	15.6712	1.00648	145	7.94249	323.398	292	1668
Sample336	31.72	-7	Africa	Morocco:Demnat	forest: mediterranean forest biome	Arid	16.4333	12.65	62.3199	0.222	36	33	7.6	316	17.4004	9.88564	1076	9.07189	627.109	465	2094
Sample337	31.7	-6.96	Africa	Morocco:Ait Bouzid	forest: mediterranean forest biome	Arid	15.7167	12.85	61.7797	0.2493	14	20.1	7.5	273	13.9733	2.92148	1174	9.07189	647.121	517	2073
Sample338	31.66	-6.93	Africa	Morocco:Ait Bouzid	forest: mediterranean forest biome	Arid	13.5208	12.3583	56.0532	0.2403	14	40.4	7.3	438	25.2479	10.7925	1593	9.07189	669.116	469	1951
Sample339	31.56	-6.99	Africa	Morocco:Ait Tamlil	forest: mediterranean forest biome	Arid	10.3833	12.65	51.9804	0.2687	10	43.9	7.2	486	17.1893	8.92653	2298	9.07189	696.678	478	1778
Sample340	33.31	-5.13	Africa	Morocco:Azrou	forest: temperate coniferous forest biome	Arid	10.4875	13.375	40.1082	0.2265	30	38	7.4	362	21.6778	1.99987	2019	8.42353	722.414	372	1642
Sample341	33.36	-5.14	Africa	Morocco:Azrou	forest: temperate coniferous forest biome	Arid	10.4042	13.0083	40.7405	0.2352	22	38.3	7	743	19.5961	0.536346	2028	8.42353	715.594	381	1619
Sample342	31.68	-7.04	Africa	Morocco:Demnat	forest: mediterranean forest biome	Arid	14.7292	12.7583	59.2575	0.2524	14	28.8	7.3	370	20.1532	5.76387	1373	8.88889	657.027	510	2020
Sample343	31.27	-7.83	Africa	Morocco:Sidi Faress	forest: mediterranean forest biome	Arid	12.2792	11.4583	57.3204	0.2847	14	40.2	7.4	547	22.0957	6.41566	1789	9.16078	620.504	522	1833
Sample535	32.69	-17.12	Africa	Madeira:Madeira	forest: temperate broadleaf forest biome	Temperate					28							7.33594
Sample623	34.19	-3.51	Africa	Morocco:Safsatat	shrubland: temperate shrubland biome	Arid	18.1167	11.5167	52.0806	0.1475	18	40.5	7.9	181	7.98219	0.409247	444	7.60784	644.464	291	1972
Sample624	34.19	-3.5	Africa	Morocco:Safsatat	forest: temperate broadleaf forest biome	Arid	18.1417	11.4833	51.2906	0.1421	18	40.2	7.9	159	6.31828	0.425583	440	7.62875	645.649	282	1984
Sample625	35.22	-2.98	Africa	Morocco:Jbel Gourougou	forest: mediterranean forest biome	Arid	16.1958	9.025	64.6705	0.2272	39	35.7	7.4	479	24.2565	8.84064	618	6.7817	502.952	364	1601
Sample626	35.04	-3.62	Africa	Morocco:Amezzaorou	forest: temperate broadleaf forest biome	Arid	13.8875	10.725	56.7974	0.3004	14	39	7.2	436	16.067	12.6349	1005	6.76602	574.678	488	1624
Sample627	35.18	-4.14	Africa	Morocco:Al-Hoceima	forest: mediterranean forest biome	Arid	16.5042	9.075	67.6927	0.2457	18	43.6	7.3	415	14.6148	10.3483	370	6.79739	488.534	391	1590
Sample628	35.12	-4.47	Africa	Morocco:El Jebha	shrubland: temperate shrubland biome	Arid	16.9083	9.8	66.9708	0.2783	18	39.1	7.5	388	14.7286	8.38436	423	6.79739	493.341	456	1638
Sample629	35.28	-5	Africa	Morocco:Assoul Steha	forest: temperate broadleaf forest biome	Arid	18.1292	10.1917	74.1391	0.3072	18	35.1	6.8	570	19.4166	6.50539	180	6.8183	478.128	511	1663
Sample630	35.12	-5	Africa	Morocco:Douar Tala Atia	forest: mediterranean forest biome	Temperate	14.775	11.0333	79.2781	0.5405	14	33.9	7	543	25.5147	8.74767	967	6.8183	595.744	897	1659
Sample631	35.16	-5.23	Africa	Morocco:Chefchaouen	forest: temperate coniferous forest biome	Temperate	11.3375	10.6917	75.7083	0.6817	27	39.8	6	749	22.3109	18.7212	1484	6.84445	609.829	1059	1553
Sample1305	-1.82	30.74	Africa	Rwanda:Akagera	forest: tropical broadleaf forest biome	Tropical	20.8583	11	60.692	0.572	22	53.5	6	247	29.1695	2.71718	1299	14.6039	29.4521	879	1536
Sample1306	-1.7	30.68	Africa	Rwanda:Akagera	woodland: tropical woodland biome	Tropical	20.2375	11.0583	59.4788	0.6017	10	42.7	5.9	311	28.7914	3.9913	1437	14.6039	30.3109	892	1482
Sample1307	-1.81	30.71	Africa	Rwanda:Akagera	grassland: montane grassland biome	Tropical	20.0917	11.15	58.9857	0.5805	14	46.9	6	320	27.4124	4.20532	1537	14.6039	29.2973	874	1505
Sample1308	-0.37	30.11	Africa	Uganda:Kalinzu	forest: tropical broadleaf forest biome	Tropical	19.6375	10.5917	39.8044	0.928	26	30.8	5.4	538	50.4635	2.27459	1600	14.5778	31.9179	1304	1405
Sample1309	0	30.9	Africa	Uganda:Kabirizi	forest: tropical broadleaf forest biome	Tropical	21.1167	11.15	42.7277	0.5973	14	40.4	6	376	46.8239	0.955947	1307	14.5412	41.7968	901	1508
Sample1310	-0.09	30.01	Africa	Uganda:Katunguru	woodland: savanna biome	Tropical	23.1542	11.4917	45.49	0.569	25	34.2	6.3	318	28.6558	0.377901	955	14.5778	38.0465	912	1602
Sample1311	0.8	30.09	Africa	Uganda:Semuliki	forest: tropical broadleaf forest biome	Tropical	22.65	10.25	30.5348	0.781	25	34.2	5.3	485	53.8333	0.467355	730	14.4418	45.5771	1164	1490
Sample1312	0.65	30.39	Africa	Uganda:Sebitoli	forest: tropical broadleaf forest biome	Tropical	19.575	10.9	46.2098	0.9974	18	29.6	5	467	56.5395	0.239022	1460	14.4418	42.5067	1427	1430
Sample1313	-1.83	29.35	Africa	Rwanda:Gishwati	forest: tropical broadleaf forest biome	Tropical	16.1	9.95	44.7454	1.3089	26	33	4.8	615	52.1692	3.07761	2156	14.9543	23.741	1526	1165
Sample1314	-2.45	29.1	Africa	Rwanda:Nyungwe	forest: tropical broadleaf forest biome	Tropical	16.8833	9.56667	47.6455	1.4233	14	31.8	5	708	48.0334	0.840845	1910	14.8863	30.1008	1710	1201
Sample1315	-2.37	30.18	Africa	Rwanda:Munazi	forest: tropical broadleaf forest biome	Tropical	20.9667	11.1167	59.9035	0.6438	10	41.3	5.7	259	31.6432	0.500747	1372	14.6457	43.3974	982	1525
Sample1316	-2	30.1	Africa	Rwanda:Kigali	woodland: tropical woodland biome	Tropical	20.1083	11.4333	57.431	0.6961	26	38.1	5.9	382	34.0362	5.48176	1611	14.6457	35.3446	1031	1480
Sample1317	-2.61	29.76	Africa	Rwanda:Butare	forest: tropical broadleaf forest biome	Tropical	19.4833	10.8	56.0659	0.8373	22	42.2	5.4	499	45.3482	1.51284	1649	14.7346	42.5512	1213	1448
Sample1318	0.58	9.34	Africa	Gabon:Mondah	forest: tropical broadleaf forest biome	Tropical	25.7792	5.725	70.1107	2.3926	25	47.3	4.8	665	41.8849	0.239019	36	13.1399	102.258	2989	1249
Sample1319	0.57	9.32	Africa	Gabon:Mondah	forest: tropical broadleaf forest biome	Tropical	25.7417	5.63333	70.3749	2.3774	13	46.7	4.8	549	40.043	0.312178	45	13.1399	102.886	2971	1249
Sample1320	0.46	9.73	Africa	Gabon:Ntoum	forest: tropical broadleaf forest biome	Tropical	26.2208	6.44167	69.1823	2.1824	13	46.8	4.9	578		0.302609	32	13.234	102.59	2664	1220
Sample1321	-1.8	10.93	Africa	Gabon:Mimongo	grassland: tropical grassland biome	Tropical	26.075	8.1	72.9766	1.813	14	53.6	5.1	399		0.0579966	105	13.2706	133.527	1968	1085
Sample1322	-1.84	10.91	Africa	Gabon:Mimongo	forest: tropical broadleaf forest biome	Tropical	26.0792	8.125	73.1013	1.7943	10	52.4	5.3	388		0.169027	106	13.2706	133.459	1955	1089
Sample1323	-1.43	10.58	Africa	Gabon:Dignietoumba	forest: tropical broadleaf forest biome	Tropical	25.9208	7.275	70.9724	1.7628	10	57.6	5	506	53.2732	0.740786	130	13.2288	135.285	1928	1093
Sample1324	-0.51	10.28	Africa	Gabon:Bengule	forest: tropical broadleaf forest biome	Tropical	26.0333	7.46667	74.0995	1.9582	17	63.2	5.2	383		0.435736	44	13.1608	111.871	2146	1095
Sample1325	-0.1	11.38	Africa	Gabon:Lope	grassland: tropical grassland biome	Tropical	26.3875	8.19167	71.4192	1.5123	13	54.3	5.1	405		3.34858	149	13.3072	100.434	1727	1141
Sample1326	-0.09	11.31	Africa	Gabon:Ayem	forest: tropical broadleaf forest biome	Tropical	25.7417	8.01667	70.5003	1.6561	16	59	5.1	439		3.53726	218	13.3072	100.45	1826	1102
Sample1327	-0.06	11.27	Africa	Gabon:Junkville	forest: tropical broadleaf forest biome	Tropical	25.9792	7.99167	70.4767	1.643	5	57.4	5.2	421	46.3766	1.44687	174	13.3072	103.955	1816	1105
Sample1328	1.37	11.59	Africa	Gabon:Zangue	forest: tropical broadleaf forest biome	Tropical	23.1375	8.79167	61.6357	1.6509	19	44.3	4.5	616		0.467445	673	13.5529	78.077	1779	1077
Sample1329	1.41	11.62	Africa	Gabon:Bibasse	forest: tropical broadleaf forest biome	Tropical	23.1875	8.875	61.347	1.6421	19	43.7	4.4	514		0.783153	671	13.5529	76.8743	1775	1080
Sample1330	1.33	11.68	Africa	Gabon:Nkout	forest: tropical broadleaf forest biome	Tropical	23.1417	8.83333	61.8811	1.6306	15	43.4	4.5	521		0.0819904	678	13.5529	79.8815	1756	1076
Sample1331	0.82	11.45	Africa	Gabon:Alenassi	forest: tropical broadleaf forest biome	Tropical	23.7333	8.65	65.5169	1.642	13	42.5	4.5	397		0.430876	547	13.485	88.6088	1762	1073
Sample1332	0.8	11.53	Africa	Gabon:Mitzic	forest: tropical broadleaf forest biome	Tropical	23.5167	8.76667	66.0181	1.6374	14	40.2	4.6	468		0.805287	608	13.4902	86.1113	1746	1066
Sample1517	6.38	2.16	Africa	Benin:Pahou	forest: tropical broadleaf forest biome	Tropical	27.2375	7.10833	79.8281	0.7189	30	57.2	5.6	350	47.9569	0.148676	16	12.8209	121.396	1134	1577
Sample1518	7.81	2.19	Africa	Benin:Dassa-Zoume	woodland: tropical woodland biome	Tropical	27.3125	10.4417	70.7832	0.6947	14	70.1	6.5	206	36.5322	2.0973	199	12.8889	157.15	1110	1597
Sample1519	8.55	2.66	Africa	Benin:Kilibo	woodland: tropical woodland biome	Tropical	26.4167	10.8333	74.6265	0.6481	26	62.1	6.2	216	36.37	0.816888	311	12.9621	153.909	1062	1638
Sample1520	9.31	2.72	Africa	Benin:Kpassa	woodland: tropical woodland biome	Tropical	26.6167	11.7333	86.2851	0.6153	18	56.6	6.1	221	35.1967	0.74839	331	12.9464	163.559	1095	1779
Sample1521	9.82	2.71	Africa	Benin:N'Dali	woodland: tropical woodland biome	Tropical	26.3167	11.8	96.0672	0.5592	22	64.2	6.1	148	37.2087	0.536829	394	12.8993	161.475	1075	1922
Sample1522	11.63	3.18	Africa	Benin:Bangoun	forest: tropical broadleaf forest biome	Tropical	28.5417	12.9833	120.132	0.3481	25	63	6.2	174	28.6527	0.303129	205	12.6065	257.654	882	2533
Sample1523	11.64	3.18	Africa	Benin:Bangoun	woodland: tropical woodland biome	Tropical	28.55	13.0167	120.132	0.3481	25	63.5	6.2	100	28.0744	0.367396	218	12.6065	258.642	882	2533
Sample1524	9.26	2.73	Africa	Benin:Okpara	woodland: tropical woodland biome	Tropical	26.6542	11.7583	85.3659	0.6184	18	55.3	6.3	162	34.8149	0.830361	316	12.9464	163.616	1092	1765
Sample1525	8.83	2.61	Africa	Benin:Papane	woodland: tropical woodland biome	Tropical	26.3708	11.3417	79.8481	0.6025	33	58.6	6.1	259	39.0203	0.523201	322	12.9621	154.5	1063	1764
Sample1526	8.89	38.93	Africa	Ethiopia:Yarar	forest: tropical coniferous forest biome	Temperate	16.3083	12.8167	94.0852	0.6353	22	14.8	6.7	422	30.3466	4.3457	2540	14.7713	106.127	1080	1699
Sample1527	7.88	39.13	Africa	Ethiopia:Asela	forest: tropical broadleaf forest biome	Temperate	13.7792	12.825	68.4504	0.741	26	27.9	5.9	559	35.7011	4.30698	2633	14.8549	87.3202	1155	1558
Sample1528	7.11	39.75	Africa	Ethiopia:Dinsho	forest: tropical coniferous forest biome	Temperate	10.9458	13.8417	55.1441	0.7152	25	34.3	6.3	526	36.9178	10.4772	3244	14.8758	65.1383	1032	1442
Sample1529	6.75	39.72	Africa	Ethiopia:Rira	forest: tropical broadleaf forest biome	Temperate	12.1375	12.0417	56.4692	0.7944	18	35.9	5.9	601		8.39527	2723	14.7346	54.6112	1095	1378
Sample1530	6.81	39.83	Africa	Ethiopia:Saute Yeterara Ch'Af	grassland: montane grassland biome	Polar/Montane	6.35	14.8167	54.8929	0.9677	10	45.2	6.3	585	8.73944	3.56474	4029	14.7346	60.8276	1310	1353
Sample1531	6.99	39.27	Africa	Ethiopia:Keta	woodland: tropical woodland biome	Temperate	14.2875	16.2083	56.6754	0.5417	25	34.6	6.6	366	29.6128	4.0443	2464	14.8967	88.3723	881	1626
Sample1854	-25.06	46.87	Africa	Madagascar:Petriki	woodland: subtropical woodland biome	Tropical	23.9208	12.1083	43.5059	0.5163	18	54.5	5.5	655		0.234069	0	10.3268	261.798	936	1812
Sample1855	-24.95	47	Africa	Madagascar:Mandena	forest: subtropical broadleaf forest biome	Tropical	23.8042	12.1917	44.1906	0.6596	22	48.6	5.3	625	43.6216	0.240523	12	10.4627	259.348	1148	1740
Sample1856	-24.75	46.85	Africa	Madagascar:Manangotry	forest: subtropical broadleaf forest biome	Temperate	21.775	11.6333	59.982	0.6579	10	46.4	5.5	508	52.7794	8.02104	504	10.5935	261.616	1109	1685
Sample1857	-24.95	47	Africa	Madagascar:Mandena	forest: subtropical broadleaf forest biome	Tropical	23.8042	12.1917	44.1906	0.6596	22	48.6	5.3	625	43.6216	0.240523	12	10.4627	259.348	1148	1740
Sample1858	-24.95	47	Africa	Madagascar:Mandena	forest: subtropical broadleaf forest biome	Tropical	23.8042	12.1917	44.1906	0.6596	22	48.6	5.3	625	43.6216	0.240523	12	10.4627	259.348	1148	1740
Sample1859	-18.92	47.92	Africa	Madagascar:Mandraka	forest: tropical broadleaf forest biome	Temperate	18.0042	10.7917	89.0407	1.1557	30	43.9	5	509	50.5249	5.64242	1279	12.4392	262.553	1505	1302
Sample1860	-22.54	45.37	Africa	Madagascar:Isalo	woodland: subtropical woodland biome	Temperate	21.7917	13.1	102.837	0.395	8	58.4	6	191	16.7977	1.28676	885	11.5556	271.166	819	2073
Sample1861	-22.56	45.38	Africa	Madagascar:Isalo	woodland: subtropical woodland biome	Temperate	21.6708	13.225	103.621	0.3935	8	57.4	6.3	195	15.733	3.34265	889	11.5556	271.59	816	2073
Sample1862	-24.95	47.01	Africa	Madagascar:Mandena	forest: subtropical broadleaf forest biome	Tropical	23.8167	12.1667	44.1908	0.6659	22		5.9		27.8594	0.0639308	11	10.4627	259.592	1156	1735
Sample1863	-22.57	45.36	Africa	Madagascar:Isalo	woodland: subtropical woodland biome	Temperate	21.8917	13.1333	102.759	0.3907	8	55.8	6.1	184	15.0418	2.1498	861	11.5556	270.998	814	2083
Sample1864	-24.76	46.85	Africa	Madagascar:Manangotry	forest: subtropical broadleaf forest biome	Temperate	22.1958	11.725	59.3087	0.6382	10	47.7	5.7	549	55.2371	9.11609	438	10.5935	265.437	1088	1704
Sample1865	-24.78	47.17	Africa	Madagascar:Sainte Luce	forest: subtropical broadleaf forest biome	Tropical	23.6333	11.5333	45.2376	0.7856	18	57.9	5.3	767	42.651	0.158362	7	10.4627	253.542	1350	1718
Sample1866	-22.53	45.37	Africa	Madagascar:Isalo	woodland: subtropical woodland biome	Temperate	21.6125	13.0417	103.478	0.3976	8	57.3	6.4	190	12.2702	1.28984	896	11.5556	269.9	820	2062
Sample1867	-22.54	45.37	Africa	Madagascar:Isalo	woodland: subtropical woodland biome	Temperate	21.7917	13.1	102.837	0.395	8	58.4	6	191	16.7977	1.28676	885	11.5556	271.166	819	2073
Sample1868	-24.99	46.93	Africa	Madagascar:Manantately	forest: subtropical broadleaf forest biome	Tropical	23.1417	12.0833	46.2576	0.6022	18	53.2	5.5	395	49.3723	10.3313	175	10.5935	259.824	1056	1753
Sample1869	9.26	2.19	Africa	Benin:Kpessou	woodland: tropical woodland biome	Tropical	26.6958	11.175	90.169	0.6007	22	57.8	6.2	168	36.5604	0.660899	314	12.9464	166.78	1085	1806
Sample1870	9.26	2.19	Africa	Benin:Kpessou	woodland: tropical woodland biome	Tropical	26.6958	11.175	90.169	0.6007	22	57.8	6.2	168	36.5604	0.660899	314	12.9464	166.78	1085	1806
Sample1919	-20.02	29.48	Africa	Zimbabwe:Shangani:Shangangwe	woodland: tropical woodland biome	Temperate	18.5458	14.075	98.8315	0.3184	18	62	6.1	141	24.2108	0.635283	1300	12.4706	339.247	634	1990
Sample1920	3.35	12.73	Africa	Cameroon:Dja Reserve:Somalomo	forest: tropical broadleaf forest biome	Tropical	23.7417	9.26667	61.4449	1.2851	12	55.6	4.9	366		1.04625	653	13.6627	63.9543	1599	1244
Sample1921	3.37	12.74	Africa	Cameroon:Dja Reserve:Somalomo	forest: tropical broadleaf forest biome	Tropical	23.8042	9.24167	61.4606	1.2753	16	55.5	5	335	46.8073	0.239397	651	13.6627	64.5424	1595	1250
Sample1980	-21.35	55.71	Africa	Reunion:Matouta	forest: tropical broadleaf forest biome	Temperate	21.425	5.28333	45.244	0.89	22	39.1	5.2	550	60.7353	11.5625	386	11.2105	231.217	1406	1579
Sample1981	-21.35	55.71	Africa	Reunion:Matouta	forest: tropical broadleaf forest biome	Temperate	21.425	5.28333	45.244	0.89	22	39.1	5.2	550	60.7353	11.5625	386	11.2105	231.217	1406	1579
Sample1982	-21.33	55.7	Africa	Reunion:Matouta	forest: tropical broadleaf forest biome	Temperate	18.05	5.63333	46.7492	1.0857	18	40.2	5.3	640	48.2249	16.0939	1031	11.2105	246.355	1572	1447
Sample1983	-21.36	55.76	Africa	Reunion:Saint-Philippe	forest: tropical broadleaf forest biome	Tropical	22.8125	4.94167	44.8469	0.8442	22	44	5.3	475		6.71164	60	11.2105	222.763	1359	1609
Sample1985	-21.34	55.7	Africa	Reunion:Matouta	forest: tropical coniferous forest biome	Temperate	19.2083	5.53333	46.3501	1.0191	22	41.3	5.2	615	54.271	10.3558	588	11.2105	240.49	1520	1491
Sample1986	-21.34	55.7	Africa	Reunion:Matouta	forest: tropical coniferous forest biome	Temperate	19.2083	5.53333	46.3501	1.0191	22	41.3	5.2	615	54.271	10.3558	588	11.2105	240.49	1520	1491
Sample2011	8.47	4.65	Africa	Nigeria:Ilorin:Kwara	woodland: tropical woodland biome	Tropical	26.0583	10.8833	77.9758	0.6908	18	73.8	6.1	179	31.3783	1.32283	302	12.9412	151.13	1162	1681
Sample2012	8.46	4.67	Africa	Nigeria:Ilorin:Kwara	woodland: tropical woodland biome	Tropical	26.0042	10.725	77.8173	0.6908	18	68.4	6	173	29.9146	0.19486	302	12.9412	152.442	1162	1681
Sample2013	8.45	4.66	Africa	Nigeria:Ilorin:Kwara	woodland: tropical woodland biome	Tropical	25.9792	10.7417	77.3814	0.6962	18	69.7	6.1	156	35.3673	0.983326	324	12.9412	152.397	1166	1674
Sample2014	8.43	4.53	Africa	Nigeria:Ilorin:Kwara	woodland: tropical woodland biome	Tropical	26.1542	10.8583	76.7915	0.6894	21	71.2	6	145	32.3416	0.77045	329	12.9412	146.465	1166	1691
Sample2015	8.47	4.67	Africa	Nigeria:Ilorin:Kwara	woodland: tropical woodland biome	Tropical	25.9458	10.7583	77.8968	0.6937	21	71.9	6.2	155	30.2207	1.32266	319	12.9412	152.113	1165	1679
Sample2016	8.47	4.66	Africa	Nigeria:Ilorin:Kwara	woodland: tropical woodland biome	Tropical	26.0292	10.825	77.821	0.6914	21	72.1	6.1	208	30.6549	0.501513	304	12.9412	152.367	1162	1680
Sample2061	-25.13	25.51	Africa	Botswana:Kanye	woodland: tropical woodland biome	Arid	19.1625	15.725	80.8386	0.1973	11	78.4	5.9	61	13.4348	0.410587	1177	11.5765	488.24	444	2249
Sample2062	-26.66	21.91	Africa	Botswana:Middlepits	shrubland: xeric shrubland biome	Arid	20.7292	18.3917	80.9526	0.1079	4	73.5	7.4	77		0.496968	940	11.1425	607.508	282	2613
Sample2063	-26.19	22.62	Africa	Botswana:Logaganeng	shrubland: xeric shrubland biome	Arid	21.6792	17.575	80.9755	0.1208	8	76	7	63	10.2328	0.0867944	980	11.2889	518.948	322	2664
Sample2064	-24.71	23.46	Africa	Botswana:Kokothsa	woodland: tropical woodland biome	Arid	22.2875	16.9083	82.1212	0.1218	10	75.4	6.9	59	14.4621	0.549316	1055	11.6392	454.728	327	2683
Sample2065	-24.61	24.57	Africa	Botswana:Iwaneng	woodland: tropical woodland biome	Arid	21.7292	16.525	80.1686	0.1354	10	84.8	6.6	60	13.8194	0.111838	1170	11.6183	425.588	356	2628
Sample2066	-24.46	26.04	Africa	Botswana:Mochudi	shrubland: tropical shrubland biome	Arid	21.25	15.55	83.7759	0.1988	39	67.1	6.3	70	15.755	0.462957	968	11.6183	466.481	466	2343
Sample2067	-23.79	26.45	Africa	Botswana:Dibete	woodland: tropical woodland biome	Arid	21	16	89.065	0.1837	33	71.4	6.6	61	14.654	0.544342	1006	11.7124	464.181	426	2318
Sample2068	-23.2	26.79	Africa	Botswana:Mahalapye	shrubland: xeric shrubland biome	Arid	21.2	15.5333	91.4087	0.1939	33	69.5	6.5	80	11.6353	0.260855	1002	11.7804	439.033	438	2257
Sample2069	-22.28	26.79	Africa	Botswana:Paje	shrubland: xeric shrubland biome	Arid	18.8625	14.8583	91.5553	0.208	11	66.5	6.4	118	21.5338	0.748379	1169	11.9686	431.136	437	2099
Sample2071	-22.52	27.05	Africa	Botswana:Palapye	woodland: tropical woodland biome	Arid	20.15	15.6	90.4392	0.1832	44				14.8449	0.27996	951	11.8118	467.216	399	2177
Sample2165	6.15	-0.92	Africa	Ghana:Nkwantanang	woodland: tropical woodland biome	Tropical	25.8542	7.975	47.954	1.1338	18	45.9	5.7	333	54.7434	0.350141	176	12.9255	96.4944	1564	1379
Sample2192	3.5	11.5	Africa	Cameroon:Mbalmayo	forest: tropical broadleaf forest biome	Tropical	23.6042	7.99167	62.6102	1.3997	35	55			49.7349	0.560668	653	13.6627	81.3091	1697	1212
Sample2193	5.2	10	Africa	Cameroon:Kekem	forest: tropical broadleaf forest biome	Tropical	24.1833	8.71667	76.1057	1.7287	18	45.4	5.4	338	44.6601	0.169518	716	13.851	100.867	2421	1400
Sample2194	5.2	10.4	Africa	Cameroon:Bangou	anthropogenic: village biome	Tropical	22.1833	9.46667	69.611	1.3822	28	34.8	5.4	430	42.2975	1.13905	1443	13.851	128.812	1955	1414
Sample2195	4.5	10	Africa	Cameroon:Yabassi	forest: tropical broadleaf forest biome	Tropical	26.8708	7.625	69.0376	1.9997	14	40.6	5	377		1.50616	103	13.4327	82.0603	2701	1350
Sample2196	4.9	10.8	Africa	Cameroon:Makenene	anthropogenic: village biome	Tropical	24.0792	8.675	72.7554	1.4321	19	50.5	5.4	321	50.1106	0.453417	740	13.6052	110.257	1963	1370
Sample2197	3.4	11.5	Africa	Cameroon:Abono Bang	anthropogenic: village biome	Tropical	23.5542	7.85833	62.2976	1.3945	22	58.2	4.9	454	55.9253	0.1478	667	13.6627	78.811	1691	1212
Sample2215	-3.8	29.4	Africa	Burundi:Nyamira Meo	woodland: tropical woodland biome	Tropical	20.3417	9.61667	65.6706	0.9555	18	35.2	5.4	339	48.4304	4.89998	1236	14.7346	57.0818	1348	1410
Sample2216	-4	29.4	Africa	Burundi:Nkayamba	woodland: tropical woodland biome	Tropical	23.6167	8.45	70.1867	0.6268						0.0869522	773	14.5516	54.7031	1027	1638
Sample2217	-4.3	29.7	Africa	Burundi:Nyanza	woodland: tropical woodland biome	Tropical	21.5875	10.0917	73.7673	0.7814	30	39.6	5.6	262	44.0399	6.20393	1044	14.4993	69.3845	1206	1543
Sample2245	-29.75	30.74	Africa	South Africa:Durban	forest: subtropical broadleaf forest biome	Temperate	17.7875	11.0583	57.0477	0.6182	46	50.2	5.7	390		2.46181	740	9.78301	307.003	935	1512
Sample2246	-29.02	26.1	Africa	South Africa:Bloemfontein	forest: subtropical broadleaf forest biome	Arid	16.1792	16.9917	65.9974	0.2462	39	72.5	7	103	15.929	0.207152	1329	10.9856	558.413	514	2087
Sample2247	-29.76	30.74	Africa	South Africa:Durban	grassland: subtropical grassland biome	Temperate	17.9792	11.0083	56.5633	0.6177	43	54.3	5.6	372	40.1513	2.7909	680	9.78301	306.011	934	1511
Sample2248	-29.02	26.1	Africa	South Africa:Bloemfontein	forest: subtropical broadleaf forest biome	Arid	16.1792	16.9917	65.9974	0.2462	39	72.5	7	103	15.929	0.207152	1329	10.9856	558.413	514	2087
Sample2250	-23.82	30.03	Africa	South Africa:Magoebaskloof	forest: subtropical broadleaf forest biome	Temperate	15.95	11.3333	74.0719	0.7005	14	46.2	5.4	426	50.0883	9.52729	1063	11.1686	275.599	1043	1488
Sample2251	-23.82	30.03	Africa	South Africa:Magoebaskloof	forest: subtropical broadleaf forest biome	Temperate	15.95	11.3333	74.0719	0.7005	14	46.2	5.4	426	50.0883	9.52729	1063	11.1686	275.599	1043	1488
Sample2321	6.15	-0.9	Africa	Ghana:Nkwantanang	woodland: tropical woodland biome	Tropical	25.9417	8.15	47.9342	1.1376	21	35.8	5.7	347	55.4277	0.654006	170	12.9255	96.2911	1574	1383
Sample2400	-11.48	27.66	Africa	Democratic Republic of the Congo:Kiziba	woodland: tropical woodland biome	Temperate	20.6708	14.725	109.281	0.5951	18	42.2	5.6	180	33.6776	0.50415	1187	13.9451	216.967	1113	1870
Sample2401	-11.48	27.67	Africa	Democratic Republic of the Congo:Kiziba	woodland: tropical woodland biome	Temperate	20.6125	14.6583	109.012	0.5944	14	47.4	5.6	185	34.6546	1.11787	1205	13.9451	216.145	1111	1868
Sample2402	-11.48	27.67	Africa	Democratic Republic of the Congo:Kiziba	woodland: tropical woodland biome	Temperate	20.6125	14.6583	109.012	0.5944	14	47.4	5.6	185	34.6546	1.11787	1205	13.9451	216.145	1111	1868
Sample2403	-11.48	27.66	Africa	Democratic Republic of the Congo:Kiziba	woodland: tropical woodland biome	Temperate	20.6708	14.725	109.281	0.5951	18	42.2	5.6	180	33.6776	0.50415	1187	13.9451	216.967	1113	1870
Sample2404	-19.88	29.45	Africa	Zimbabwe:Shangani:Jabulani	woodland: tropical woodland biome	Temperate	17.7667	13.1	100.699	0.3387	14	59.9	5.9	148	24.8415	0.981482	1434	12.7163	330.869	660	1948
Sample2405	-19.93	29.62	Africa	Zimbabwe:Shangani:Debshan	woodland: tropical woodland biome	Temperate	18.8042	14.4583	99.4298	0.3198	22	68.5	6.3	115	18.0173	0.283476	1271	12.6954	335.467	645	2016
Sample2426	-17.85	30.8	Africa	Zimbabwe:Lake Chivero:Chivero	woodland: tropical woodland biome	Temperate	18.4208	13.375	107.33	0.4155	33	55.3	5.9	186	27.3397	1.1599	1452	13.0092	290.872	806	1939
Sample2427	-18.33	30.02	Africa	Zimbabwe:Eiffel Flats:Charama	woodland: tropical woodland biome	Temperate	21.0917	13.9833	110.364	0.3377	24	46.7	6	190	29.8898	1.19878	1169	12.9987	295.718	739	2187
Sample2428	-17.84	31.09	Africa	Zimbabwe:Harare:Mukuvisi	woodland: tropical woodland biome	Temperate	18.625	12.7333	107.636	0.4424	56	34.4	5.9	202		0.747271	1497	12.9412	285.693	861	1946
Sample2429	-18.18	31.62	Africa	Zimbabwe:Marondera:Gosho	woodland: tropical woodland biome	Temperate	16.7625	11.7583	101.513	0.4873	43	61.8	5.7	149	26.8973	2.14724	1622	12.8261	288.075	867	1778
Sample2430	-20.14	31.06	Africa	Zimbabwe:Masvingo:Glenlivet	woodland: tropical woodland biome	Temperate	19.325	11.7167	97.7404	0.3829	18				22.3632	4.27171	1057	12.1464	319.093	724	1890
Sample2431	-19.88	29.46	Africa	Zimbabwe:Shangani:Jabulani	woodland: tropical woodland biome	Temperate	17.7292	13.0583	100.154	0.3408	14	60.4	5.9	139	24.0788	0.881101	1444	12.7163	330.719	663	1945
Sample2432	-19.22	30.4	Africa	Zimbabwe:Mvuma:Mtao	woodland: tropical woodland biome	Temperate	18.4917	13.6667	107.068	0.3441	18	59.2	6.2	131	20.3128	0.302657	1361	12.7686	311.702	688	1998
Sample2433	-18.07	25.5	Africa	Zimbabwe:Victoria Falls:Fuller	woodland: tropical woodland biome	Arid	22.9875	15.6417	115.08	0.2481	9	67.4	6.5	119	26.6126	0.0579682	1064	12.7791	326.991	606	2442
Sample2434	-19.1	28.01	Africa	Zimbabwe:Victoria Falls:Forest Hill	woodland: tropical woodland biome	Arid	20.9292	16.1917	110.798	0.2623	18	54.6	6.6	102	22.7579	0.126069	1001	12.7268	371.523	584	2226
Sample2483	33.52	-5	Africa	Morocco:Ifran	forest: mediterranean forest biome	Temperate	10.7375	11.5083	41.1494	0.2152	18	44.1	7	481	24.5706	6.31473	1787	8.23007	671.149	340	1579
Sample2484	33.4	-5.19	Africa	Morocco:Azrou	forest: mediterranean forest biome	Temperate	10.6083	11.95	43.1565	0.2406	18	44.1	7.7	478	20.8097	2.97694	1863	8.42353	685.867	386	1604
Sample2516	8.76	-3.77	Africa	Cote d'Ivoire:Ago	woodland: tropical woodland biome	Tropical	27.1667	9.86667	70.3903	0.5603	14	47.6	6.4	241	34.8612	0.381077	218	12.8732	140.718	1017	1815
Sample2517	8.76	-3.77	Africa	Cote d'Ivoire:Ago	woodland: tropical woodland biome	Tropical	27.1667	9.86667	70.3903	0.5603	14	47.6	6.4	241	34.8612	0.381077	218	12.8732	140.718	1017	1815
Sample2518	8.76	-3.77	Africa	Cote d'Ivoire:Ago	woodland: tropical woodland biome	Tropical	27.1667	9.86667	70.3903	0.5603	14	47.6	6.4	241	34.8612	0.381077	218	12.8732	140.718	1017	1815
Sample2519	8.77	-3.77	Africa	Cote d'Ivoire:Ago	woodland: tropical woodland biome	Tropical	27.2167	9.83333	70.5526	0.5566	14	49	6.4	198	34.2997	0.685552	222	12.8732	140.103	1015	1823
Sample2520	8.77	-3.77	Africa	Cote d'Ivoire:Ago	woodland: tropical woodland biome	Tropical	27.2167	9.83333	70.5526	0.5566	14	49	6.4	198	34.2997	0.685552	222	12.8732	140.103	1015	1823
Sample2521	8.77	-3.77	Africa	Cote d'Ivoire:Ago	woodland: tropical woodland biome	Tropical	27.2167	9.83333	70.5526	0.5566	14	49	6.4	198	34.2997	0.685552	222	12.8732	140.103	1015	1823
Sample2522	8.77	-3.77	Africa	Cote d'Ivoire:Ago	woodland: tropical woodland biome	Tropical	27.2167	9.83333	70.5526	0.5566	14	49	6.4	198	34.2997	0.685552	222	12.8732	140.103	1015	1823
Sample2523	8.77	-3.77	Africa	Cote d'Ivoire:Ago	woodland: tropical woodland biome	Tropical	27.2167	9.83333	70.5526	0.5566	14	49	6.4	198	34.2997	0.685552	222	12.8732	140.103	1015	1823
Sample2524	8.77	-3.77	Africa	Cote d'Ivoire:Ago	woodland: tropical woodland biome	Tropical	27.2167	9.83333	70.5526	0.5566	14	49	6.4	198	34.2997	0.685552	222	12.8732	140.103	1015	1823
Sample2624	-22.69	14.79	Africa	Namibia:Goanikontes	desert: subtropical desert biome	Arid	20.0208	13.225	101.802	0.0126	5	78.6	8.6	42	0.0255556	1.26536	297	11.7176	192.241	28	2219
Sample2625	-22.67	15.03	Africa	Namibia:Goanikontes	desert: subtropical desert biome	Arid	20.5958	14.0083	111.658	0.0192	1	78	8.5	49	0.180833	0.409379	396	12.0575	217.145	44	2281
Sample2626	-24.74	15.32	Africa	Namibia:Sossusflei	desert: subtropical desert biome	Arid	19.3542	15.8417	91.4736	0.0165	0	77.7	8.7	60	1.50183	0.316702	583	11.5294	269.979	39	2357
Sample2627	-23.3	17.16	Africa	Namibia:Rehoboth	desert: subtropical desert biome	Arid	19.2458	17.0417	116.836	0.0975	28	75.2	8.2	51	7.81694	0.318822	1400	12.2301	405.426	247	2531
Sample2639	0.63	10.38	Africa	Gabon:Tchimbele	forest: tropical broadleaf forest biome	Tropical	22.8417	7.51667	64.9725	2.2472	6	40.6	4.7	568		3.24862	593	13.4536	107.868	2427	1080
Sample2815	31.66	-6.99	Africa	Morocco:Ait Bouzid	forest: mediterranean forest biome	Arid	14.5333	12.5833	58.6765	0.2528	14	34.4	7	338	20.3354	8.29732	1676	9.07189	658.591	507	2005
Sample2816	32.02	-6.7	Africa	Morocco:Ait Bouzid	forest: mediterranean forest biome	Temperate	16.3917	12.3667	62.8029	0.2297	26	35.1	7.2	260	17.9453	5.72397	964	8.64837	668.046	481	2093
Sample2829	27.17	33.82	Africa	Egypt:Hurghada	desert: subtropical desert biome	Arid	23.8458	9.14167	36.1814	0.0011	52	49.5				0.156665	5	9.31766	528.847	3	2690
Sample2830	-33.98	18.43	Africa	South Africa:Table Mountain1	forest: subtropical broadleaf forest biome	Temperate	15.6917	8.23333	61.4708	0.4009	34	77	6.2	1005	31.4431	15.9905	224	8.61176	284.62	630	1571
Sample2831	-33.98	18.43	Africa	South Africa:Table Mountain2	forest: subtropical broadleaf forest biome	Temperate	15.6917	8.23333	61.4708	0.4009	34	77	6.2	1005	31.4431	15.9905	224	8.61176	284.62	630	1571
Sample2832	-33.96	18.41	Africa	South Africa:Table Mountain3	shrubland: subtropical shrubland biome	Temperate	13.1875	8.34167	53.5366	0.4247	38	74.6	6.2	680	13.7921	16.4832	740	8.61176	267.804	689	1622
Sample2833	-33.97	18.42	Africa	South Africa:Table Mountain4	shrubland: subtropical shrubland biome	Temperate	13.1792	8.30833	51.6622	0.4288	34	73.5	6.3	783	16.1903	18.1211	873	8.61176	268.874	692	1613
Sample2834	-34.41	19.23	Africa	South Africa:Hermanus	shrubland: subtropical shrubland biome	Temperate	16.1958	8.775	49.2242	0.4408	38	73	6.5	630	18.5211	5.18659	39	8.49674	258.074	643	1458
Sample2835	-34.57	19.45	Africa	South Africa:Platbos forest	forest: subtropical broadleaf forest biome	Arid	16.2708	8.99167	42.5046	0.409	15	72.5	6	549	33.2611	4.17974	159	8.17255	272.459	580	1417
Sample2836	-33.99	20.46	Africa	South Africa:Marloth Nature Reserve1	forest: subtropical broadleaf forest biome	Arid	15.4708	11.0417	18.4773	0.2414	30	61.1	6.4	923	18.0837	19.2584	541	9.05098	383.088	402	1664
Sample2837	-33.99	20.46	Africa	South Africa:Marloth Nature Reserve2	shrubland: subtropical shrubland biome	Arid	15.4708	11.0417	18.4773	0.2414	30	61.1	6.4	923	18.0837	19.2584	541	9.05098	383.088	402	1664
Sample2838	-34.5	20.42	Africa	South Africa:De Hoop Nature Reserve1	shrubland: subtropical shrubland biome	Arid	17.6167	10.05	34.6126	0.2877	9	67.4	6.9	496	20.8459	0.256001	30	8.13072	318.6	449	1560
Sample2839	-34.47	20.51	Africa	South Africa:De Hoop Nature Reserve2	shrubland: subtropical shrubland biome	Arid	17.3333	9.41667	29.5163	0.2736	9	66	6.8	427	20.1431	1.70988	65	8.47059	305.929	420	1534
Sample2840	-33.98	22.61	Africa	South Africa:Wilderness	forest: subtropical broadleaf forest biome	Arid	17.2042	9.50833	21.3074	0.4028	46	63.3	5.8	887	42.6436	3.55234	64	9.07712	253.856	597	1481
Sample2841	-33.89	22.97	Africa	South Africa:Balmoral	forest: subtropical broadleaf forest biome	Temperate	15.975	9.88333	17.5399	0.4174	9	64.1	5.6	799	37.9543	2.29633	379	9.07712	286.527	632	1513
Sample2842	-34.03	23.2	Africa	South Africa:Harkerwille	forest: subtropical broadleaf forest biome	Temperate	16.2625	9.025	17.9031	0.5082	17	64.8	5.2	757	44.7844	2.58727	286	8.47582	275.459	735	1446
Sample2843	-33.96	23.9	Africa	South Africa:Stormsriver	forest: subtropical broadleaf forest biome	Temperate	16.15	8.78333	19.8344	0.5486	22	55.4	5.4	1036	39.7438	7.86342	479	8.88889	278.437	785	1430
Sample2844	-33.49	26.21	Africa	South Africa:Driekoppen	shrubland: subtropical shrubland biome	Arid	17.5958	11.275	23.8085	0.3643	10	58.4	6.2	434	29.3048	3.51615	285	8.96209	274.255	593	1627
Sample2845	-32.6	26.94	Africa	South Africa:Hogsback	forest: subtropical broadleaf forest biome	Temperate	15.0333	11.8833	51.7088	0.3987	18	37.3	5.7	827	42.3859	5.96235	1213	9.46928	295.407	669	1677
Sample2846	-32.54	27.36	Africa	South Africa:Kologha forest	forest: subtropical broadleaf forest biome	Temperate	16.0125	10.8917	52.4292	0.4237	14	42.5	5.7	638	41.923	8.75996	1011	9.19216	268.727	711	1677
Sample2847	-28.89	31.45	Africa	South Africa:Dlinza forest	forest: subtropical broadleaf forest biome	Temperate	18.9625	10.4583	52.1816	0.7334	42	51.3	5.6	459	44.6489	0.344969	534	9.97124	249.847	1137	1550
Sample2848	-28.88	31.38	Africa	South Africa:Entumeni forest	forest: subtropical broadleaf forest biome	Temperate	18.3417	10.5333	54.1237	0.6742	17	54.1	5.4	519	47.2644	3.46987	686	9.97124	250.598	1045	1549
Sample2849	-28.71	32.2	Africa	South Africa:Nzalabuntu	forest: subtropical broadleaf forest biome	Arid					21	68.5		472		0.89483	70	9.69412
Sample2850	-28.26	31.94	Africa	South Africa:Hluhluwe	woodland: savanna biome	Temperate	20.4917	10.5	45.4268	0.6573	9	52.6	6.2	298	29.4083	1.82618	218	9.89804	244.074	1016	1545
Sample2851	-28.38	32.41	Africa	South Africa:St.Lucia	forest: subtropical broadleaf forest biome	Tropical	21.8583	8.78333	32.4737	0.7708	39		5.9	816	38.018	0.494108	23	9.79347	261.428	1205	1563
Sample2852	-28.26	32.48	Africa	South Africa:Cape Vidal	forest: subtropical broadleaf forest biome	Tropical	21.5875	8.39167	35.6844	0.7218	13	65	5.4	580	46.8826	2.01714	72	9.79347	256.188	1120	1551
Sample2916	-19.72	63.3	Africa	Mauritius:Rodrigues:Ile Cocos	forest: tropical broadleaf forest biome	Tropical											0	11.5712
Sample2919	-22.5	45.3	Africa	Madagascar	forest: tropical broadleaf forest biome	Temperate	20.8042	12.325	106.109	0.4057	12	53.2	6.1	277	16.7268	6.53585	1036	11.5556	263.848	813	2003
Sample2934	-3.36	37.36	Africa	Tanzania:Moshi:Rau	forest: tropical broadleaf forest biome	Tropical	23.3792	11.0917	98.945	0.4586	35	36	6.4	215	52.5386	0.705211	787	14.2379	181.164	778	1696
Sample2935	-3.37	37.36	Africa	Tanzania:Moshi:Moshi	forest: tropical broadleaf forest biome	Tropical	23.4167	11.0667	99.1148	0.4031	35	42.8	6.1	356	61.5578	0.492906	780	14.2379	181.413	708	1756
Sample2936	-3.52	37.47	Africa	Tanzania:Moshi:Rural Kahe	woodland: tropical woodland biome	Arid	23.6417	10.65	85.7731	0.2905	26	44.4	7.1	182	46.0549	0.104564	701	14.2431	178.705	517	1779
Sample2937	-4.2	37.76	Africa	Tanzania:Same Kirinjiko:Same	woodland: tropical woodland biome	Arid	23.3917	11.3333	70.3526	0.3854	18	48.2	7.3	182	16.0341	1.31243	749	14.0601	188.002	708	1836
Sample2938	-4.7	38.13	Africa	Tanzania:Korogwe:Bwiko	shrubland: tropical shrubland biome	Arid	23.8875	11.4583	67.4962	0.2942	22	47	7.2	212	19.8931	1.23459	452	13.7412	188.826	491	1668
Sample2939	-5.07	38.41	Africa	Tanzania:Korogwe:Kunga	forest: tropical broadleaf forest biome	Temperate	18.45	8.98333	57.8933	1.0697	18	36.8	5.3	559	52.1607	5.93394	1247	13.6209	186.377	1313	1227
Sample2940	-5.07	38.4	Africa	Tanzania:Korogwe:Kunga	forest: tropical broadleaf forest biome	Temperate	18.5708	9.00833	58.29	1.0754	18	38.4	5.4	597	46.9416	0.405075	1288	13.6209	184.963	1321	1228
Sample2941	-4.95	38.45	Africa	Tanzania:Korogwe:Balangai	forest: tropical broadleaf forest biome	Temperate	18.0875	9.075	59.3159	1.0528	18	37.9	5.3	701	54.9588	4.04576	1409	13.7412	186.756	1286	1221
Sample2942	-4.89	38.42	Africa	Tanzania:Lushoto:Ndelemai	forest: tropical broadleaf forest biome	Temperate	17.2	9.3	60.6286	0.9094	14	37.3	5.3	680	50.2727	3.56484	1613	13.7412	193.849	1117	1228
Sample2943	-4.77	38.7	Africa	Tanzania:Korogwe:Mashewa-Maramba	forest: tropical broadleaf forest biome	Tropical	23.9458	9.34167	49.2154	0.4902	10	47.9	6.3	297	33.5958	1.67899	415	13.532	152.382	780	1591
Sample2944	-4.69	38.66	Africa	Tanzania:Lushoto:Mng'aro-Kikumbi	woodland: tropical woodland biome	Tropical	23.9167	9.23333	46.6191	0.4164	10	47.5	6.3	331	35.8006	5.91853	429	13.532	143.374	664	1594
Sample2945	-4.61	38.59	Africa	Tanzania:Lushoto:Mng'aro-Kikumbi	woodland: tropical woodland biome	Tropical	24.025	9.71667	51.4239	0.3816	10	41.8	6.5	242	29.3436	0.941386	394	13.532	143.345	622	1629
Sample2946	-4.43	38.43	Africa	Tanzania:Lushoto Mng'aro	woodland: tropical woodland biome	Tropical	24.0833	10.55	58.8565	0.3355	10	49.2	6.8	170	25.5327	0.35108	410	13.7882	164.736	563	1677
Sample2947	-5.23	39.03	Africa	Tanzania:Pangani:Pangani road	woodland: tropical woodland biome	Tropical	26.5875	8.375	69.2094	0.7703	22	60.9	5.9	353	41.4886	1.05493	45	13.3177	154.26	1275	1655
Sample2948	-5.36	39.04	Africa	Tanzania:Pangani:Pangani road	woodland: tropical woodland biome	Tropical	26.8583	8.1	65.0706	0.5751	26		6.1		43.0157	0.378198	2	13.3177	149.131	1035	1799
Sample2949	-5.44	38.98	Africa	Tanzania:Pangani:Pangani road	woodland: tropical woodland biome	Tropical	26.8667	8.01667	52.6954	0.5856	22	54.3	6.1	448	39.9385	2.16227	21	13.4379	152.559	1046	1785
Sample2950	-5	38.99	Africa	Tanzania:Muheza	woodland: tropical woodland biome	Tropical	26.0583	8.76667	61.5494	0.7562	21	62.6	5.7	352	40.104	0.354237	109	13.4379	161.426	1202	1589
Sample2951	-4.89	38.82	Africa	Tanzania:Mkinga	forest: tropical broadleaf forest biome	Tropical	25.0958	8.59167	53.3335	0.6262	10	56.1	5.9	390	46.8761	0.557949	221	13.532	162.081	966	1542
Sample2952	-5.21	38.43	Africa	Tanzania:Handeni:Kwemsala	shrubland: tropical shrubland biome	Tropical	24.2375	10.0083	68.1513	0.7321	22	33.8	6.2	322	39.724	0.755787	351	13.6209	182.547	1084	1480
Sample2953	-5.33	38.28	Africa	Tanzania:Handeni:Kwemsala	forest: tropical broadleaf forest biome	Tropical	23.6833	10.3	64.3246	0.6275	18	44.6	6.6	357	35.1843	1.5086	461	13.6209	177.87	920	1466
Sample2954	-5.57	38.45	Africa	Tanzania:Handeni:Msangazi	forest: tropical broadleaf forest biome	Tropical	24.3958	9.75833	53.395	0.6886	18	51.7	6.3	324	41.0495	1.32252	327	13.5373	170.34	1038	1507
Sample2955	-5.16	38.6	Africa	Tanzania:Muheza:Amani Nature Reserve:Kwamkoro	forest: tropical broadleaf forest biome	Tropical	20.2042	8.475	57.7513	1.2053	18	37.3	5.4	526	48.5961	0.918686	1025	13.4379	185.147	1572	1304
Sample2956	-5.11	38.6	Africa	Tanzania:Muheza:Amani Nature Reserve:Turako	forest: tropical broadleaf forest biome	Temperate	19.9458	8.50833	58.2715	1.1851	18	35.6	5.3	470	51.4319	1.68811	1014	13.4379	185.943	1534	1294
Sample2957	-5.09	38.64	Africa	Tanzania:Muheza:Amani Nature Reserve:Police station	forest: tropical broadleaf forest biome	Tropical	20.9958	8.45833	57.4904	1.1379	14	38.5	5.2	438	54.6276	6.97627	889	13.4379	170.54	1532	1346
Sample2958	-5.09	38.63	Africa	Tanzania:Muheza:Amani Nature Reserve:Mbomole	forest: tropical broadleaf forest biome	Temperate	20.4458	8.525	57.2313	1.1874	18	36.6	5.3	488	51.0356	2.90798	966	13.4379	180.938	1570	1322
Sample2959	-4.95	38.66	Africa	Tanzania:Muheza:Nilo Forest Nature Reserve	forest: tropical broadleaf forest biome	Tropical	21.8292	8.675	57.3084	0.9731	10	34.4	5.4	522	55.6904	6.28468	812	13.532	145.484	1358	1395
Sample2960	-4.94	38.66	Africa	Tanzania:Korogwe:Nilo Forest Nature Reserve	forest: tropical broadleaf forest biome	Tropical	21.4667	8.7	57.2745	1.023	10	38.7	5.3	557	51.9891	3.75895	845	13.532	153.776	1422	1390
Sample2979	-3.81	35.87	Africa	Tanzania:Milima Mitatu Mdori	woodland: tropical woodland biome	Arid	22.2833	12.0167	90.7343	0.3304	14	38.4	7.3	166	17.4031	0.663415	988	14.5516	154.542	597	1806
Sample2980	-4.35	35.76	Africa	Tanzania:Kikore	woodland: tropical woodland biome	Temperate	19.1708	9.84167	90.9986	0.5209	18	59.2	6	316	41.4655	3.33149	1615	14.5098	162.417	811	1556
Sample2981	-4.81	35.86	Africa	Tanzania:Bolisa	woodland: tropical woodland biome	Temperate	19.1083	11.05	95.3482	0.4867	18	57	6.2	203	18.3759	2.46572	1746	14.4993	166.171	799	1641
Sample2982	-5.72	35.82	Africa	Tanzania:Maya Maya	woodland: tropical woodland biome	Arid	21.5292	11.4083	107.256	0.3189	26	65.3	6.1	129	30.2439	0.762969	1200	14.3268	166.535	589	1846
Sample2983	-6.18	37.04	Africa	Tanzania:Berega	woodland: tropical woodland biome	Tropical	21.1708	10.8917	85.7318	0.5065	18	56.2	6.4	212	28.1329	5.24664	1101	13.7935	159.452	811	1601
Sample2984	-6.16	37.58	Africa	Tanzania:Turiani	woodland: tropical woodland biome	Tropical	24.5125	9.64167	71.9464	0.6568	18	43.1	6.3	293	51.9173	4.37213	442	13.5948	168.781	1079	1642
Sample3009	-6.67	38.53	Africa	Tanzania:Mlandizi	woodland: tropical woodland biome	Tropical	26.4917	9.2	69.8398	0.5527	22	66.9	6	160	39.7351	0.23407	98	13.281	143.92	967	1749
Sample3010	-6.66	38.47	Africa	Tanzania:Mlandizi	woodland: tropical woodland biome	Tropical	26.3833	9.31667	68.8872	0.5495	14	62.8	6.1	178	37.4656	0.30277	125	13.3699	146.153	955	1737
Sample3011	-6.63	38.16	Africa	Tanzania:Chalinze	woodland: tropical woodland biome	Tropical	25.4875	9.425	65.6025	0.5561	18	44.7	6.7	185	35.6136	0.413049	258	13.3699	155.974	924	1661
Sample3012	-6.66	38.01	Africa	Tanzania:Msolwa	woodland: tropical woodland biome	Tropical	25.3833	9.5	65.2305	0.5775	18	54.1	6.4	206	34.1683	0.428592	325	13.3699	164.128	969	1677
Sample3013	-6.87	37.6	Africa	Tanzania:Morogoro	woodland: tropical woodland biome	Tropical	24.5833	9.83333	75.3739	0.5733	18	40.6	6.2	198	29.82	1.23509	517	13.485	184.9	980	1709
Sample3014	-6.91	37.54	Africa	Tanzania:Melela	woodland: tropical woodland biome	Tropical	24.4667	10.2167	77.2925	0.6171	18	40	6	179	30.4647	1.38249	556	13.485	188.84	1035	1677
Sample3015	-6.93	37.41	Africa	Tanzania:Melela	woodland: tropical woodland biome	Tropical	24.8292	10.4417	78.8473	0.584	30	46	6.6	214	26.6897	0.496165	509	13.6784	182.302	1001	1713
Sample3016	-2.94	37.09	Africa	Tanzania:Elerai-Sanya Juu	woodland: tropical woodland biome	Temperate	17.3375	11.3917	91.9222	0.7015	18	31.7	6.1	682	42.3379	6.34538	1889	14.2118	164.747	1035	1475
Sample3017	-3.2	35.37	Africa	Tanzania:Bashay Karatu	woodland: tropical woodland biome	Temperate	14.2708	9.575	80.1863	0.7457	13	48	6.2	446	41.3493	6.53339	2365	14.5882	124.471	995	1334
Sample3018	-3.08	35.36	Africa	Tanzania:Ngorongoro	grassland: tropical grassland biome	Arid	19.6042	12.9417	88.0747	0.327	25	45.3	8	208	12.9364	3.04268	1678	14.5882	130.479	600	1834
Sample3055	0.29	25.3	Africa	Democratic Republic of the Congo:Tshopo:Yoko	forest: tropical broadleaf forest biome	Tropical	24.625	9.01667	29.8649	1.2804	28	57.4	4.7	267	50.5286	0.648084	453	13.8248	53.2362	1748	1365
Sample3056	0.29	25.3	Africa	Democratic Republic of the Congo:Tshopo:Yoko	forest: tropical broadleaf forest biome	Tropical	24.625	9.01667	29.8649	1.2804	28	57.4	4.7	267	50.5286	0.648084	453	13.8248	53.2362	1748	1365
Sample3057	0.29	25.31	Africa	Democratic Republic of the Congo:Tshopo:Yoko	forest: tropical broadleaf forest biome	Tropical	24.625	9.01667	29.9454	1.2855	21	59.6	4.6	264	49.7153	0.169005	461	13.8248	53.2362	1751	1362
Sample3058	0.3	25.3	Africa	Democratic Republic of the Congo:Tshopo:Yoko	forest: tropical broadleaf forest biome	Tropical	24.6167	9.01667	29.728	1.2834	21	58	4.8	272	49.2448	0.562758	450	13.8248	52.1943	1751	1364
Sample3059	0.29	25.32	Africa	Democratic Republic of the Congo:Tshopo:Yoko	forest: tropical broadleaf forest biome	Tropical	24.6333	9.01667	29.8218	1.2829	13	58.6	4.6	272	49.9938	0.233677	456	13.8248	52.1071	1750	1364
Sample3060	0.29	25.32	Africa	Democratic Republic of the Congo:Tshopo:Yoko	forest: tropical broadleaf forest biome	Tropical	24.6333	9.01667	29.8218	1.2829	13	58.6	4.6	272	49.9938	0.233677	456	13.8248	52.1071	1750	1364
Sample3061	-2.31	28.76	Africa	Democratic Republic of the Congo:Sud-Kivu:PNKB	forest: tropical broadleaf forest biome	Temperate	15.8833	9.96667	44.7432	1.6412	18	29.9	5	838	55.9208	7.48757	2096	14.8549	44.4324	1888	1150
Sample3062	-2.32	28.74	Africa	Democratic Republic of the Congo:Sud-Kivu:PNKB	forest: tropical broadleaf forest biome	Temperate	14.5	8.65	45.9105	1.7919	14	30.3	5	907	56.4147	0.493973	2345	14.8549	31.5508	1936	1080
Sample3063	-2.32	28.74	Africa	Democratic Republic of the Congo:Sud-Kivu:PNKB	forest: tropical broadleaf forest biome	Temperate	14.5	8.65	45.9105	1.7919	14	30.3	5	907	56.4147	0.493973	2345	14.8549	31.5508	1936	1080
Sample3087	11.24	-5.42	Africa	Mali:Farako	woodland: tropical woodland biome	Tropical	26.8208	11.4083	107.421	0.4787	14	45.5	5.7	174	33.4139	2.27807	454	12.7634	177.808	1081	2257
Sample3088	10.17	-4.93	Africa	Burkina Faso:Niangoloko	woodland: tropical woodland biome	Tropical	26.8958	10.1083	95.8911	0.5373	22	58.7	6.1	153	40.7124	0.196917	318	12.8366	94.3509	1135	2112
Sample3090	10.21	1.45	Africa	Benin:Kota	forest: tropical broadleaf forest biome	Tropical	26.1333	11.5	97.7759	0.5942	18	60.5	5.9	161	34.1282	3.11234	520	12.847	174.373	1219	2051
Sample3092	11.19	-4.44	Africa	Burkina Faso:Kou	forest: tropical broadleaf forest biome	Tropical	27.5292	11.0083	108.12	0.4249	14	66.2	6.3	165	39.4997	0.228971	356	12.7111	178.331	970	2282
Sample3093	10.21	1.45	Africa	Benin:Kota	woodland: tropical woodland biome	Tropical	26.1333	11.5	97.7759	0.5942	18	60.5	5.9	161	34.1282	3.11234	520	12.847	174.373	1219	2051
Sample3094	11.24	-5.42	Africa	Mali:Farako	woodland: tropical woodland biome	Tropical	26.8208	11.4083	107.421	0.4787	14	45.5	5.7	174	33.4139	2.27807	454	12.7634	177.808	1081	2257
Sample3095	-2.3	40.87	Africa	Kenya:Lamu	grassland: tropical grassland biome	Tropical										0.39433	3	13.3595
Sample3096	-1.6	35.39	Africa	Kenya:Ololaimutiek	woodland: tropical woodland biome	Tropical	18.3625	12.2083	55.345	0.5535	14	49	6.7	292	34.4254	5.45979	1906	14.8445	88.6034	949	1714
Sample2653	-73.04	-13.41	Antarctica	Antarctica:Dronning Maud Land:Vestfjella:Basen nunatak	desert: polar desert biome	Polar/Montane	-13.5875	5.175	76.8124	0.4726						6.91492	490	2.46275	593.89	249	526
Sample2928	-67.59	-68.34	Antarctica	Antarctica:Leonie Island	tundra biome	Polar/Montane											0	2.41046
Sample2929	-64.88	-62.52	Antarctica	Antarctica:Paradise Bay	tundra biome	Polar/Montane										0	0	2.69804
Sample2930	-64.88	-63.59	Antarctica	Antarctica:Yelcho base	tundra biome	Polar/Montane										0	0	2.65098
Sample2931	-67.83	-67.23	Antarctica	Antarctica:Horseshoe island	tundra biome	Polar/Montane	-5.575	6.21667	50.4291	0.6596						6.83756	69	2.7817	468.224	295	447
Sample2932	-62.65	-60.61	Antarctica	Antarctica:South Shetlands:Harinah Point	tundra biome	Polar/Montane										2.13277	18	2.77124
Sample477	3.73	101.71	Asia	Malaysia:Fraser Hill	forest: tropical broadleaf forest biome	Tropical	21.1917	8.76667	31.5256	2.2568	14	35.4	4.7	575		6.11628	1033	13.8667	57.2011	2749	1218
Sample478	3.71	101.74	Asia	Malaysia:Fraser Hill	forest: tropical broadleaf forest biome	Tropical	19.7	8.65	34.9821	2.3654	14	33.8	4.8	890		12.5104	1062	13.8667	60.9023	2736	1156
Sample480	3.71	101.72	Asia	Malaysia:Fraser Hill	forest: tropical broadleaf forest biome	Tropical	19.9958	8.69167	34.2612	2.3342	14	33.2	4.7	751		4.23041	1181	13.8667	60.1686	2730	1169
Sample481	3.3	101.62	Asia	Malaysia:Templer Park	forest: tropical broadleaf forest biome	Tropical	26.6708	9.075	28.7794	1.7486	33	40.5	4.6	587	44.5953	1.34257	129	13.8301	37.3836	2624	1500
Sample482	3.22	101.84	Asia	Malaysia:Sg Songcak	forest: tropical broadleaf forest biome	Tropical	25.3083	8.61667	27.8369	1.7043	14	38.2	4.7	525	53.551	7.33823	309	13.8301	44.9157	2423	1421
Sample508	20.35	105.6	Asia	Viet Nam:Cuc Phuong	forest: subtropical broadleaf forest biome	Temperate	21.8875	6.175	93.647	1.3601	14	27.3	5.5	401	49.0015	2.73206	437	11.3203	451.241	1740	1279
Sample509	22.35	103.78	Asia	Viet Nam:Sa Pa	forest: subtropical broadleaf forest biome	Temperate	14.15	8.13333	87.6759	1.9524	18	31.6	5	698	42.7502	11.9058	1917	11.4562	400.074	2162	1107
Sample510	22.32	103.79	Asia	Viet Nam:Sa Pa	forest: subtropical broadleaf forest biome	Temperate	13.4708	7.975	88.2695	1.9707	14	31.5	5.2	728	45.0744	11.6007	2042	11.4562	398.454	2118	1074
Sample512	29.46	79.23	Asia	India:Sitabani	forest: subtropical broadleaf forest biome	Temperate	21.9167	11.35	114.67	1.0855	14	34.2	5.7	515	40.9135	3.55479	706	10.217	568.992	1910	1759
Sample513	29.49	79.14	Asia	India:Corbett Museum	forest: subtropical broadleaf forest biome	Temperate	22.9583	11.3167	116.725	0.9942	26	33.9	6.1	442	35.9169	0.148697	476	10.217	591.4	1789	1799
Sample514	14.27	74.76	Asia	India:Mavingundi	forest: tropical broadleaf forest biome	Tropical	23.5583	8.66667	157.949	2.768	22	45.2	5.7	439	45.5445	3.16614	693	12.5961	136.778	4718	1704
Sample515	14.28	74.74	Asia	India:Mavingundi	forest: tropical broadleaf forest biome	Tropical	23.5667	8.56667	158.028	2.8551	22	43.9	5.7	457	47.8846	1.67475	654	12.5961	135.35	4857	1701
Sample516	13.5	75.23	Asia	India:Mavikutte	forest: tropical broadleaf forest biome	Tropical	22.9375	9.29167	146.061	2.8645	18	44.2	5.4	393	42.9782	2.53751	766	12.8993	157.265	4828	1685
Sample517	13.52	75.02	Asia	India:Shedimane	forest: tropical broadleaf forest biome	Tropical	26.525	8.75	145.063	3.1505	18	46.5	5.6	320	47.632	1.28065	124	12.8366	138.884	5895	1871
Sample518	13.45	75.02	Asia	India:Hebri	forest: tropical broadleaf forest biome	Tropical	26.7708	8.90833	143.378	2.9575	18	45.2	5.7	270	47.136	0.871912	82	12.8993	141.348	5613	1897
Sample558	18.51	98.44	Asia	Thailand:Doi Inthanon SW	forest: tropical broadleaf forest biome	Tropical	23.2375	11.6083	80.8987	0.625	10	52	5.8	322	40.5096	11.7973	922	12.0993	250.89	1037	1659
Sample559	19.5	97.97	Asia	Thailand:Crystal Cave	forest: tropical broadleaf forest biome	Tropical	24.3958	10.375	84.8481	0.7106	10	49.1	5.6	334	55.8029	7.71816	615	12.115	277.058	1205	1695
Sample560	19.41	98.86	Asia	Thailand:Chiang Dao NP	forest: tropical broadleaf forest biome	Temperate	22.0167	10.75	83.9476	0.7192	18	43.9	5.7	380	50.8733	8.79425	1121	12.0471	267.338	1163	1616
Sample561	20.08	99.16	Asia	Thailand:Huamereng	forest: tropical broadleaf forest biome	Temperate	18.05	10.9833	81.2068	0.857	10	34.8	5.4	562	58.5495	7.8309	1867	12.0209	265.835	1301	1517
Sample562	18.83	98.89	Asia	Thailand:Doi Suthep summit	forest: tropical coniferous forest biome	Temperate	20.25	10.7167	81.3841	0.6926	31	40.8	5.6	552	54.4022	8.38091	1491	12.0523	235.623	1108	1599
Sample632	40.68	39.66	Asia	Turkey:Trabzon province:S?ela Monastiri	forest: temperate coniferous forest biome	Continental	8.00833	9.98333	33.8494	0.5125	17	36.9	6.3	847	25.4575	19.3152	1667	6.73464	736.909	601	1172
Sample633	40.51	39.42	Asia	Turkey:G??hane province:Haciemin	forest: temperate broadleaf forest biome	Continental	10.6167	10.9667	35.8061	0.3912	22	33.1	7.1	583	15.0932	1.56023	1109	6.66144	790.622	514	1313
Sample634	40.24	39.45	Asia	Turkey:G??hane province:Kelkit	shrubland: temperate shrubland biome	Continental	7.39583	11.3417	46.9649	0.4034	18	34	7	376	15.536	3.01252	1796	7.32026	883.926	530	1313
Sample635	40.32	40.23	Asia	Turkey:Bayburt province:Degrimencik	forest: temperate broadleaf forest biome	Arid	6.98333	12.0333	43.5329	0.3545	25	26.9	7.3	368	12.4304	5.1354	1676	7.60784	908.666	454	1280
Sample636	40.44	40.82	Asia	Turkey:Erzurum province:Pazaryolu	forest: temperate broadleaf forest biome	Arid	9.3875	11.375	31.4162	0.3738	22	25.7	7.2	485	14.8056	5.04213	1341	7.64967	927.688	498	1332
Sample637	40.68	41.35	Asia	Turkey:Erzurum province:Karakale	forest: temperate broadleaf forest biome	Continental	11.4042	10.5417	20.5129	0.4838	18	33.6	7.2	580	11.7692	14.2358	1172	7.22092	855.882	646	1335
Sample638	41.23	41.82	Asia	Turkey:Artvin province:S?b?l?40		Continental	8.575	9.8	18.1011	0.7606	25	42.1	5.8	899	28.6733	15.7747	1178	6.87059	741.162	910	1196
Sample639	41.37	41.62	Asia	Turkey:Artvin province:Demirciler	forest: temperate broadleaf forest biome	Temperate	12.7	8.2	29.1534	1.3596	26	27.5	5.5	1149	42.1948	8.43988	381	6.87059	626.85	1560	1147
Sample640	40.84	40.49	Asia	Turkey:Trabzon province:Soguksu	forest: temperate broadleaf forest biome	Temperate	12.5167	7.86667	26.8703	1.0937	22	27.6	5.2	819	41.0158	8.97075	531	6.8549	658.905	1242	1135
Sample641	40.83	39.7	Asia	Turkey:Trabzon province:Kozluca	forest: temperate broadleaf forest biome	Temperate	11.9958	8.175	21.6256	0.723	17	31.7	6.1	822	35.2919	12.6404	691	6.73464	641.619	835	1154
Sample642	40.87	39.52	Asia	Turkey:Trabzon province:Akpinar	forest: temperate broadleaf forest biome	Continental	8.84583	9.30833	27.6022	0.6066	14	39.2	6	784	43.1566	5.43342	1428	6.73464	678.73	711	1172
Sample643	41.02	39.5	Asia	Turkey:Trabzon province:Meseli	forest: temperate coniferous forest biome	Temperate	13.2333	7.43333	23.8366	0.8217	34		5.3	1125	37.4553	7.0275	392	5.72549	602.021	948	1153
Sample644	41.02	39.5	Asia	Turkey:Trabzon province:Meseli	forest: temperate broadleaf forest biome	Temperate	13.2333	7.43333	23.8366	0.8217	34		5.3	1125	37.4553	7.0275	392	5.72549	602.021	948	1153
Sample1333	26.09	91.7	Asia	India:Assam:Guwahati	forest: subtropical broadleaf forest biome	Temperate	22.5625	8.65833	95.9639	1.6911	18	35.6	5.2	427	42.3997	6.47113	328	10.1176	394.854	2489	1471
Sample1334	26.13	92.37	Asia	India:Assam:Baltala	forest: subtropical broadleaf forest biome	Temperate	23.5583	9.18333	94.2864	1.0649	14	36	5.4	236	42.6256	7.09068	124	10.1176	418.128	1618	1519
Sample1335	25.83	92.88	Asia	India:Assam:Matikhola	forest: subtropical broadleaf forest biome	Temperate	24.175	10.7	80.8644	0.9659	14	31.4	5.5	219	47.034	0.756289	95	10.4575	451.273	1494	1546
Sample1336	25.12	93.02	Asia	India:Assam:Haflong	forest: subtropical broadleaf forest biome	Temperate	20.85	9.45	82.7284	1.5446	10	32.2	5.1	391	45.1709	13.5467	698	10.9804	398.006	2232	1445
Sample1337	25.25	92.38	Asia	India:Meghalaya:Mynkre	forest: subtropical broadleaf forest biome	Temperate	20.4875	9.44167	98.7676	2.7229	10	39.6	5	469	46.3103	2.99977	811	10.6823	383.892	3866	1419
Sample1338	25.55	91.89	Asia	India:Meghalaya:Shillong	forest: tropical coniferous forest biome	Temperate	15.225	8.75	89.0127	2.0352	27	33.2	5.2	722	34.6225	5.82832	1868	10.4314	371.199	2670	1311
Sample1339	25.26	91.5	Asia	India:Meghalaya:Mawsynram	forest: subtropical broadleaf forest biome	Temperate	20.7	8.4	108.304	4.8324	10	38.9	5	711	37.719	14.8377	788	10.6667	370.338	6847	1416
Sample1340	25.36	91.61	Asia	India:Meghalaya:Weiloi	forest: subtropical broadleaf forest biome	Temperate	16.275	8.46667	106.468	4.691	10	32.8	5.3	461	32.6101	4.66757	1574	10.6667	358.491	6156	1312
Sample1341	25.5	91.28	Asia	India:Meghalaya:Nongstoin	forest: subtropical broadleaf forest biome	Temperate	16.8083	8.53333	110.374	5.3063	10	35.1	5.1	791	36.9628	4.68348	1410	10.6144	360.333	7047	1328
Sample1342	25.59	90.81	Asia	India:Meghalaya:Rongieng	forest: subtropical broadleaf forest biome	Temperate	22.3833	8.96667	103.601	2.8568	10	41.1	5	371	45.2336	1.74291	460	10.3686	365.665	4257	1490
Sample1343	25.61	90.74	Asia	India:Meghalaya:Narringari	forest: subtropical broadleaf forest biome	Temperate	22.9792	9.10833	101.785	2.4611	10	40.6	5.1	244	45.8958	0.317072	353	10.3686	368.316	3720	1511
Sample1344	25.65	90.7	Asia	India:Meghalaya:Songsak	forest: subtropical broadleaf forest biome	Temperate	22.9875	9.075	102.023	2.4644	10	39.9	5	240	48.1763	0.816681	362	10.3686	366.923	3749	1516
Sample1345	25.57	90.54	Asia	India:Meghalaya:Rongrenggre	forest: subtropical broadleaf forest biome	Temperate	23.3333	9.1	101.571	2.3219	10	40.2	5	378	42.1405	1.0189	280	10.3686	370.781	3549	1528
Sample1346	26.17	90.55	Asia	India:Assam:Pancharatna	forest: subtropical broadleaf forest biome	Temperate	24.3792	9.325	100.877	1.8935	30	44.5	5.3	231	38.289	1.26074	50	10.1699	364.919	2902	1532
Sample1347	26.34	90.52	Asia	India:Assam:Boitamari	forest: subtropical broadleaf forest biome	Temperate	24.4083	9.18333	102.15	2.067	18	44.9	5.2	233	41.5773	5.533	88	10.1699	364.073	3171	1534
Sample1348	27.49	90.65	Asia	Bhutan:Chumey	forest: subtropical coniferous forest biome	Temperate	9.2875	9.75833	89.2648	0.801	10	26.7	5.4	680	34.7076	11.0313	3052	12.183	507.459	1053	1311
Sample1349	27.5	89.87	Asia	Bhutan:Punakha	forest: subtropical broadleaf forest biome	Temperate	17.5958	11.325	86.1351	0.8286	22	33.4	5.5	639	34.8746	20.4755	1825	12.4444	451.651	1264	1525
Sample1350	27.65	89.81	Asia	Bhutan:Nosagang	forest: subtropical coniferous forest biome	Temperate	17.4042	12.7917	87.2286	0.9182	10	32.8	5.5	707	39.1419	19.1357	1781	13.0144	442.644	1373	1495
Sample1351	27.52	89.76	Asia	Bhutan:Menchuna	forest: subtropical broadleaf forest biome	Temperate	13.8875	10.5917	94.1042	0.6628	14	30.9	5.7	541	40.7401	12.1278	2419	13.0144	470.745	914	1378
Sample1352	27.49	89.32	Asia	Bhutan:Paro	forest: subtropical coniferous forest biome	Temperate	10.9542	10.975	87.9719	0.6714	18	39.3	5.6	648	33.7162	12.4425	2776	12.6274	475.941	893	1329
Sample1353	27.49	89.36	Asia	Bhutan:Taktsang	forest: subtropical broadleaf forest biome	Temperate	10.6125	11.4083	87.0925	0.6712	10	40.2	5.7	822	33.4296	14.193	2728	12.6274	475.601	890	1325
Sample1354	26.68	89.29	Asia	India:West Bengal:Jaldapara	forest: subtropical broadleaf forest biome	Temperate	24.8875	9.40833	107.996	2.1408	18	46.7	5.3	284	41.0772	0.240777	113	11.2	375.688	3435	1604
Sample1355	26.66	89.34	Asia	India:West Bengal:Hashimara	forest: subtropical broadleaf forest biome	Temperate	24.8292	9.425	108.319	2.1312	22	44	5.2	266	27.916	0.502903	97	11.2	377.663	3401	1595
Sample1356	26.56	89.54	Asia	India:West Bengal:Paschim Jitpur	forest: subtropical broadleaf forest biome	Temperate	24.7917	9.68333	109.104	2.0911	43	46.5	5.4	225	43.812	0.410143	69	11.1216	389.147	3299	1577
Sample1357	26.64	90.26	Asia	India:West Bengal:Mohendrapur	forest: subtropical broadleaf forest biome	Temperate	24.5417	9.6	106.3	2.1536	22	44.6	5.2	211	46.5948	0.282932	107	11.0222	370.269	3350	1555
Sample1358	26.48	91.1	Asia	India:Assam:Sarapeta	grassland: tropical grassland biome	Tropical	24.3	9.56667	95.022	1.6051	26	38	5.7	192	27.3046	0.151255	45	10.1281	377.961	2436	1517
Sample1359	26.25	91.55	Asia	India:Assam:Hajo	forest: subtropical broadleaf forest biome	Temperate	24.0417	9.41667	89.806	1.1964	26	36.1	5.3	195	39.5783	0.809936	68	10.1176	399.959	1798	1502
Sample1871	43.59	132.47	Asia	Russia:Primorye Krai:Ussuriiskii	forest: temperate broadleaf forest biome	Continental	4.15	11.1	71.8019	0.7333	12	32.2	5.6	895	32.2744	4.86751	223	4.97778	1268.81	702	957
Sample1872	43.49	133.58	Asia	Russia:Primorye Krai:Lazovskii Hrebet	forest: temperate broadleaf forest biome	Continental	0.629167	13.475	69.9915	0.9548	14	42.6	5.4	1058	31.8954	2.79615	862	5.11895	1310.35	818	856
Sample1873	43.38	132.95	Asia	Russia:Primorye Krai:Serebrjanye Kljutshi	forest: temperate coniferous forest biome	Continental	2.97917	11.9083	70.886	0.8127	11	38.2	5.4	797	33.172	12.2453	689	5.1817	1241.83	755	928
Sample1874	43.36	132.97	Asia	Russia:Primorye Krai:Serebrjanye Kljutshi	forest: temperate broadleaf forest biome	Continental	3.8	11.95	68.7378	0.7794	12	34.9	5.4	873	34.6085	4.93241	455	5.1817	1229.61	740	949
Sample1875	43.61	132.51	Asia	Russia:Primorye Krai:Ussuriiskii	forest: temperate broadleaf forest biome	Continental	4.3625	11.4083	69.5171	0.7301	17	33.9	5.6	727	32.8992	2.36759	131	5.02484	1280.1	701	960
Sample1876	43.21	132.05	Asia	Russia:Primorye Krai:Vladivostok N	forest: temperate broadleaf forest biome	Continental	4.21667	8.23333	76.304	0.7981	40	34.2	5.5	667	31.4907	3.94093	210	5.09804	1187.02	722	904
Sample1877	43.49	133.68	Asia	Russia:Primorye Krai:Lazovskii Hrebet	forest: temperate coniferous forest biome	Continental	2.09583	13.325	69.1579	0.8863	13	36.8	5.7	1107	29.6237	10.1536	608	5.11895	1291.82	775	874
Sample1878	43.48	133.58	Asia	Russia:Primorye Krai:Lazovskii Hrebet	forest: temperate coniferous forest biome	Continental	0.641667	13.4333	69.6681	0.9596	15	43.9	5.2	1039	32.4478	5.24234	853	5.11895	1309.84	821	855
Sample1879	43.1	131.56	Asia	Russia:Primorye Krai:Kedrovaya Pad SE	forest: temperate broadleaf forest biome	Continental	5.04167	8.03333	79.2156	0.7635	18	31.5	5.6	915	33.2814	9.38516	150	4.98823	1159.5	702	919
Sample1880	43.28	133.16	Asia	Russia:Primorye Krai:Hmelnitskoje	forest: temperate broadleaf forest biome	Continental	4.35417	12.4583	65.3529	0.7615	18	34.5	5.6	878	32.4346	8.21991	266	5.1451	1229.32	739	970
Sample1881	43.55	132.43	Asia	Russia:Primorye Krai:Ussuriiskii	forest: temperate broadleaf forest biome	Continental	4.4125	10.675	72.837	0.721	13	34	5.6	887	31.007	7.77077	162	4.97778	1251.99	695	963
Sample1882	42.74	130.69	Asia	Russia:Primorye Krai:Kamyshovyy	forest: temperate broadleaf forest biome	Continental	6.36667	10.0667	88.2198	0.6584	18	29.6	6.6	753	34.3122	0.609921	24	5.08235	1113	653	991
Sample1883	43.13	131.41	Asia	Russia:Primorye Krai:Kedrovaya Pad W	forest: temperate broadleaf forest biome	Continental	4.82083	8.725	79.5418	0.7433	18	31.3	5.5	729	35.1711	5.78834	214	5.00915	1167.93	694	933
Sample1884	43.38	132.95	Asia	Russia:Primorye Krai:Serebrjanye Kljutshi	forest: temperate coniferous forest biome	Continental	2.97917	11.9083	70.886	0.8127	11	38.2	5.4	797	33.172	12.2453	689	5.1817	1241.83	755	928
Sample1885	43.1	131.56	Asia	Russia:Primorye Krai:Kedrovaya Pad SE	forest: temperate broadleaf forest biome	Continental	5.04167	8.03333	79.2156	0.7635	18	31.5	5.6	915	33.2814	9.38516	150	4.98823	1159.5	702	919
Sample1886	42.76	130.69	Asia	Russia:Primorye Krai:Kamyshovyy	forest: temperate broadleaf forest biome	Continental	6.09583	10.0583	87.9667	0.6636	18	30.1	6.1	720	35.7992	1.73421	49	5.08235	1116.03	656	988
Sample1887	42.57	130.79	Asia	Russia:Primorye Krai:Mramornaya	forest: temperate broadleaf forest biome	Continental	6.63333	8.78333	87.5697	0.7019	22	31.4	6.2	482	30.6364	1.84468	14	5.08235	1065.29	681	970
Sample1888	43.11	131.55	Asia	Russia:Primorye Krai:Kedrovaya Pad SE	forest: temperate broadleaf forest biome	Continental	4.15	8.35	80.2808	0.785	18	30.9	5.6	811	33.6568	4.67972	281	4.98823	1167.12	717	913
Sample1890	43.29	142.6	Asia	Japan:Hokkaido	forest: temperate coniferous forest biome	Continental	3.53333	8.78333	35.6947	1.6385	14	45.6	5.2	1007		3.50808	598	5.31242	1026.86	1150	701
Sample1891	35.05	136.43	Asia	Japan:Komono	forest: temperate coniferous forest biome	Temperate	11.6625	7.875	47.5078	1.8791	22	39.4	4.8	774	44.5694	9.46736	667	7.23138	832.729	2005	1066
Sample1892	36.8	139.49	Asia	Japan:Nikko	forest: temperate broadleaf forest biome	Continental	4.7	8.88333	61.6705	2.7138	18	35.9	5.1	988	38.2844	11.8638	1678	6.79737	890.618	1972	726
Sample1893	39.88	141.17	Asia	Japan:Hirosaki	forest: temperate broadleaf forest biome	Continental	9.29583	8.875	33.8445	1.4118	46	39.1	5.3	756	26.2817	0.843865	210	5.77778	932.529	1297	918
Sample1894	24.16	121.29	Asia	Taiwan:Heping	forest: subtropical coniferous forest biome	Temperate	7.44167	6.25	57.8569	5.5632	14	22.5	4.8	1549	32.7544	18.4917	2733	10.5726	360.245	4217	758
Sample1895	24.14	121.29	Asia	Taiwan:Xiulin	forest: subtropical coniferous forest biome	Temperate	6.75417	6.275	57.0704	5.8567	14	21.8	4.7	1904	32.1719	16.1647	2822	10.5726	358.402	4326	738
Sample1896	38.34	47.31	Asia	Iran:Azer	forest: temperate broadleaf forest biome	Arid	7.7125	10.6417	55.4567	0.2461	18	30.2	7.1	448	16.0244	16.5491	1990	7.74902	879.941	333	1352
Sample1897	37.43	49.1	Asia	Iran:Ziavar	forest: temperate broadleaf forest biome	Temperate	12.8375	8.89167	50.6254	0.7618	22	21.1	7	425	29.8175	1.48643	71	6.94902	764.042	726	952
Sample1904	30.14	51.54	Asia	Iran:Nour	woodland: woodland: temperate woodland biome	Arid	21.4	14.15	107.077	0.0945	50	27.7	7.9	87	19.2752	2.09192	964	10.7556	883.606	237	2506
Sample1905	30.73	51.57	Asia	Iran:Yasuj	woodland: woodland: temperate woodland biome	Arid	13.9125	14.6083	91.0257	0.1152	38	23.7	7.7	143	16.4849	6.41025	2094	10.6248	877.305	237	2056
Sample1948	2.98	102.31	Asia	Malaysia:Pasoh	forest: tropical broadleaf forest biome	Tropical	26.3625	8.325	30.3557	1.3218	14	35.4	5	565	54.6878	0.308284	120	13.7569	48.0589	1942	1469
Sample1949	6.42	80.42	Asia	Sri Lanka:Sinharaja	forest: tropical broadleaf forest biome	Tropical	23.8625	6.225	34.286	2.5431	14	35.5	5.1	772	53.4192	2.7473	526	13.4118	54.2773	4142	1628
Sample1950	6.42	80.42	Asia	Sri Lanka:Sinharaja	forest: tropical broadleaf forest biome	Tropical	23.8625	6.225	34.286	2.5431	14	35.5	5.1	772	53.4192	2.7473	526	13.4118	54.2773	4142	1628
Sample1951	6.42	80.42	Asia	Sri Lanka:Sinharaja	forest: tropical broadleaf forest biome	Tropical	23.8625	6.225	34.286	2.5431	14	35.5	5.1	772	53.4192	2.7473	526	13.4118	54.2773	4142	1628
Sample1962	6.42	80.42	Asia	Sri Lanka:Sinharaja	forest: tropical broadleaf forest biome	Tropical	23.8625	6.225	34.286	2.5431	14	35.5	5.1	772	53.4192	2.7473	526	13.4118	54.2773	4142	1628
Sample1973	24.2	120.9	Asia	Taiwan:Hai-Sun Experimental Forests	forest: subtropical coniferous forest biome	Temperate	18.9083	6.2	81.6915	1.9734	22	26	5.1	860	55.5253	7.54816	980	10.7137	389.783	2579	1306
Sample1976	32.74	35.03	Asia	Israel:Carmel Mountain National Park	forest: mediterranean forest biome	Temperate	17.5375	8.50833	111.905	0.4109	31	20.1	6.8	766	30.2424	5.92216	469	8.03138	565.027	731	1778
Sample1977	32.91	35.74	Asia	Israel:Gamla	forest: mediterranean forest biome	Temperate	18.325	10.7	108.737	0.2669	26	15.4	7.6	282	23.0199	2.57009	406	8.16732	623.073	521	1951
Sample1978	31.34	35.11	Asia	Israel:Ezor Be'er Sheva	shrubland: temperate shrubland biome	Arid	17.4167	11.4167	109.253	0.1407	18	25.5	7.8	237	15.0783	5.37454	791	8.50196	593.056	289	2052
Sample1979	31.1	34.82	Asia	Israel:Ramat Negev	desert: temperate desert biome	Arid	19.2333	12.4667	104.098	0.0888	14	34.4	7.8	71		0.95478	345	8.31896	578.235	190	2138
Sample1984	30.32	119.44	Asia	China:ZJ:Tianmushan	forest: temperate coniferous forest biome	Temperate	13.8458	7.575	48.6534	1.3459	14	32.2	5.4	488	39.7352	7.91473	513	8.54902	841.936	1446	1074
Sample1995	30.34	119.43	Asia	China:ZJ:Tianmushan	forest: temperate coniferous forest biome	Continental	11.3708	7.275	49.1801	1.7082	14	38.8	5.3	635	39.01	13.1395	1015	8.54902	814.085	1588	929
Sample2017	30.34	119.44	Asia	China:ZJ:Tianmushan	forest: temperate coniferous forest biome	Temperate	12.0042	7.34167	49.0819	1.6061	14	37.2	5.4	664	38.1045	15.6484	896	8.54902	821.568	1551	965
Sample2018	24.9	51.17	Asia	Qatar:Al Kharrara	shrubland: xeric shrubland biome	Arid	26.8042	11.525	109.359	0.026	9	56.3	7.9	54		0.0862815	51	9.97646	685.879	74	2842
Sample2019	24.9	51.19	Asia	Qatar:Al Kharrara	shrubland: xeric shrubland biome	Arid	26.7583	11.4667	108.468	0.0263	9	57.4	7.9	41		0.0289841	52	9.97646	687.26	75	2842
Sample2020	25.12	51.22	Asia	Qatar:Mukaynis	shrubland: xeric shrubland biome	Arid	26.7792	11.3417	107.786	0.028	15	53.7	7.9	46		0.352125	37	9.82483	687.292	79	2814
Sample2021	25.21	50.98	Asia	Qatar:Al Kharsaah	shrubland: xeric shrubland biome	Arid	26.5542	11.3417	107.411	0.0289	8	59.3	7.9	55		0.0289841	48	9.83006	691.663	81	2802
Sample2022	25.26	51	Asia	Qatar:Al Kharsaah	shrubland: xeric shrubland biome	Arid	26.625	11.3333	106.43	0.0296	8	53.5	7.9	43		0.0869522	38	9.82483	692.576	83	2802
Sample2023	25.22	50.77	Asia	Qatar:Umm Bab	desert: subtropical desert biome	Arid	26.6917	10.6833	104.736	0.0264		64.1				0.288334	4	9.83006	679.876	75	2837
Sample2024	25.07	51.09	Asia	Qatar:Al-Kiranah	desert: subtropical desert biome	Arid	26.6667	11.2667	108.088	0.0273	5	57.2	8	39		0.10028	55	9.82483	688.349	77	2816
Sample2025	25.07	51.09	Asia	Qatar:Al-Kiranah	desert: subtropical desert biome	Arid	26.6667	11.2667	108.088	0.0273	5	57.2	8	39		0.10028	55	9.82483	688.349	77	2816
Sample2026	25.02	51.05	Asia	Qatar:Al-Kiranah	desert: subtropical desert biome	Arid	26.725	11.25	108.468	0.0265	22		7.9	61		0.41364	48	9.82483	684.967	75	2827
Sample2027	42.06	128.26	Asia	China:Jilin:Changbaishan	forest: temperate coniferous forest biome	Continental	-0.470833	13.1583	95.0163	0.9917	22	32.1	5.5	1296	26.3218	1.95557	1412	5.66275	1262.57	785	791
Sample2038	42.03	128.43	Asia	China:Jilin:Changbaishan	forest: temperate coniferous forest biome	Continental	0.320833	12.9417	95.7668	0.9285	18	31.5	5.7	929	21.2646	0.476278	1275	5.66275	1240.59	750	807
Sample2046	37.74	126.53	Asia	South Korea:Munsu	forest: temperate broadleaf forest biome	Continental	11.0833	8.5	97.3274	1.1497		34.6			25.0315	2.35126	11	6.22222	1016.36	1257	1093
Sample2047	36.71	127.07	Asia	South Korea:Taehwasan	forest: temperate broadleaf forest biome	Continental	10.9292	10.1917	86.4733	1.1605	14	36.7	5.9	398	35.6348	7.16989	363	6.54641	1011.86	1293	1114
Sample2048	42.43	128.12	Asia	China:Jilin:Changbaishan	forest: temperate coniferous forest biome	Continental	3.0375	12.8083	95.7897	0.7631	38				12.3043	0.520146	718	5.66275	1303.29	692	906
Sample2049	36.71	127.65	Asia	South Korea:Sotjeommal	forest: temperate coniferous forest biome	Continental	10.2042	10.6083	89.2007	1.2289	14	35.3	5.8	542	33.8802	5.48449	271	6.61961	1013.98	1300	1057
Sample2050	37	128.81	Asia	South Korea:Bonghwa	forest: temperate coniferous forest biome	Continental	8.8	10.8667	75.6111	1.2585	22	28.2	5.6	617	32.1514	4.83559	547	6.48889	977.429	1305	1036
Sample2059	39.97	115.43	Asia	China:Beijing:Donglingshan	forest: temperate coniferous forest biome	Continental	6.46667	12.1167	111.931	0.3671	18	42.5	6.6	563	27.3876	3.39997	1186	6.24837	1119.68	493	1342
Sample2070	39.96	115.43	Asia	China:Beijing:Donglingshan	forest: temperate broadleaf forest biome	Continental	6.4875	12.125	111.931	0.3668	18	43.1	6.7	624	25.9514	5.48108	1328	6.24837	1120.35	493	1343
Sample2073	58.38	45.65	Asia	Russia:Kostroma Oblast:Sharyinsky	forest: temperate broadleaf forest biome	Continental	2.75417	8.70833	32.6425	0.8442	30	47.3	5.2	1178	33.5008	0.237626	141	2.83399	1061.17	614	727
Sample2074	56.79	58.27	Asia	Russia:Sverdlovsk Oblast:Achitskiy	forest: temperate coniferous forest biome	Continental	1.7	9.81667	37.3548	0.7956	22	39.6	5.4	1133		2.44995	254	3.2	1182.53	606	761
Sample2075	56.53	66.5	Asia	Russia:Tyumen Oblast:Zavodoukovskiy	forest: temperate coniferous forest biome	Continental	1.65833	9.83333	54.2637	0.506	43	35.1	6.1	592	26.9108	1.20869	103	2.94379	1300.19	428	845
Sample2076	55.35	78.6	Asia	Russia:Novosibirsk oblast:Novogutovo	forest: temperate coniferous forest biome	Continental	0.579167	10.1917	44.7234	0.4602	19	37.8	6.5	714		0.327107	126	3.10588	1386.35	388	843
Sample2077	55.71	83.7	Asia	Russia:Novosibirsk Oblast:Starobibeevo	forest: temperate coniferous forest biome	Continental	0.95	9.71667	42.4857	0.5472	18	31.2	6.7	792		0.29437	86	3.08497	1312.17	457	835
Sample2078	55.44	64.88	Asia	Russia:Kurgan Oblast:Ketovsky	forest: temperate coniferous forest biome	Continental	1.97917	9.74167	51.7929	0.434	18	34.5	6.4	871		0.155998	157	3.20523	1335.96	387	891
Sample2098	25.48	51.42	Asia	Qatar:Al Sakhama	desert: subtropical desert biome	Arid	26.725	11.0167	108.722	0.0301	42	58.7	7.9	60		0.0869522	17	9.82483	684.22	83	2757
Sample2099	25.69	51.56	Asia	Qatar:Al-Waha	grassland: flooded grassland biome	Arid	26.5208	9.89167	107.813	0.0357					16.9494	0.10816	4	9.72548	667.132	94	2628
Sample2100	25.4	51.47	Asia	Qatar:Al-Khisah	shrubland: xeric shrubland biome	Arid	26.7917	10.7667	109.643	0.0295	48	58.5	7.9	64		0.356905	19	9.82483	680.03	81	2743
Sample2101	25.37	51.5	Asia	Qatar:Al Tarfa	shrubland: xeric shrubland biome	Arid	26.8583	10.5	109.643	0.0295	52					0.386012	6	9.82483	676.115	81	2738
Sample2102	25.83	51.24	Asia	Qatar:Al Ghuwayriyah	shrubland: xeric shrubland biome	Arid	26.5083	11.35	103.392	0.0346	11	50.4	7.8	41		0.0966047	18	9.72548	690.036	95	2742
Sample2104	25.86	51.08	Asia	Qatar:Al Nu'man	shrubland: xeric shrubland biome	Arid	26.4875	11.2917	104.292	0.0334	12	58	7.8	72		0.241565	17	9.72548	689.226	92	2748
Sample2105	25.62	51.08	Asia	Qatar:Al-Jumayliyah	desert: subtropical desert biome	Arid	26.4875	11.2417	105.939	0.0314	29	54.9	7.9	50		0.131802	38	9.72548	689.928	87	2765
Sample2106	25.51	51	Asia	Qatar:Khawzan	desert: subtropical desert biome	Arid	26.6042	11.225	105.825	0.0304	16	55.5	7.8	58		0.11244	24	9.72548	687.718	85	2788
Sample2107	25.37	51.5	Asia	Qatar:Al Tarfa	shrubland: xeric shrubland biome	Arid	26.8583	10.5	109.643	0.0295	52					0.386012	6	9.82483	676.115	81	2738
Sample2142	73.34	80.54	Asia	Russia:Krasnoyarsk:Dixon	tundra biome	Polar/Montane	-11.7042	5.725	29.9045	1.4474	4	36.1	6	2061		0.668918	28	1.15556	1254.63	343	236
Sample2143	73.35	80.53	Asia	Russia:Krasnoyarsk:Dixon	tundra biome	Polar/Montane	-11.6625	5.75833	30.2842	1.4588		38.7	6	2173		1.18172	15	1.15556	1253.26	343	235
Sample2144	69.42	86.5	Asia	Russia:Krasnoyarsk:Dudinka	forest: subpolar coniferous forest biome	Continental	-10.025	8.13333	27.1311	1.1329	20					0.519585	55	1.56863	1541.17	485	428
Sample2145	56.46	33.05	Asia	Russia:Tver:Tsentral?o Lesnoy State Reserve	forest: temperate coniferous forest biome	Continental	4.5375	7.775	33.7701	0.9403	8	46.3	5.1	1575	35.0417	0.377377	256	3.21569	923.509	688	731
Sample2149	71.02	73.8	Asia	Russia:Yamalo-Nenets:Gydan peninsula	tundra biome	Polar/Montane	-10.7542	6.89167	33.578	1.0525	4	49.2	5.7	2170		0.626548	24	1.31242	1282.42	272	258
Sample2150	70.99	73.86	Asia	Russia:Yamalo-Nenets:Gydan peninsula	tundra biome	Polar/Montane	-10.7083	6.96667	33.1401	1.0683	4					1.16425	9	1.35425	1286.25	272	254
Sample2151	53.85	127.36	Asia	Russia:Amur region:Zeya District	forest: temperate broadleaf forest biome	Continental	-2.32083	11.9083	97.9697	0.6746	8					5.60837	514	3.50327	1639.16	548	812
Sample2152	53.87	127.36	Asia	Russia:Amur region:Zeya District	forest: temperate coniferous forest biome	Continental	-2.99583	12.1583	97.1824	0.7044	8	41.5	5.3	1052	23.6898	5.05371	466	3.50327	1638.04	563	799
Sample2153	54.12	126.93	Asia	Russia:Amur region:Zeya District	tundra biome	Continental	-6.125	12.4333	96.0287	0.9305	8	46.5	5.4	1305	34.793	7.84493	1320	3.51373	1536.47	645	693
Sample2154	54.12	126.93	Asia	Russia:Amur region:Zeya District	forest: temperate coniferous forest biome	Continental	-6.125	12.4333	96.0287	0.9305	8	46.5	5.4	1305	34.793	7.84493	1320	3.51373	1536.47	645	693
Sample2155	54.11	126.92	Asia	Russia:Amur region:Zeya District	forest: temperate coniferous forest biome	Continental	-4.92083	12.7083	100.004	0.8135	8	47	5.3	1486	30.1657	6.15265	821	3.51373	1565.42	594	730
Sample2156	54.37	125.66	Asia	Russia:Amur region:Tynda District	forest: temperate coniferous forest biome	Continental	-5.45	13.9667	90.2131	0.8319	0	48.4	5.1	1401		5.24599	768	3.61307	1591.47	601	722
Sample2166	30.83	90.08	Asia	China:Nam Co	grassland: montane grassland biome	Polar/Montane	-2.12917	13.475	119.872	0.3496	0	57.1	7.1	378	5.10594	4.76571	5104	13.2915	763.531	396	1132
Sample2168	30.83	91.05	Asia	China:Nam Co	grassland: montane grassland biome	Polar/Montane	-1.1625	12.1083	119.109	0.3613	5	66.4	7.7	323	8.50693	0.303771	4732	13.2758	803.459	414	1145
Sample2169	30.91	91.02	Asia	China:Nam Co	grassland: montane grassland biome	Polar/Montane	-1.03333	13.0833	119.109	0.3543	5	61.1	7.8	221	4.74638	0.846738	4739	13.2758	800.824	414	1168
Sample2170	30.83	91.36	Asia	China:Nam Co	grassland: montane grassland biome	Polar/Montane	-5.46667	11.7667	112.878	0.4792	5	55.6	7.2	456		6.3089	5179	13.2758	819.987	436	909
Sample2171	30.83	91.33	Asia	China:Nam Co	grassland: montane grassland biome	Polar/Montane	-4.00833	12.3833	114.647	0.4361	5	59.3	7.1	429	14.6735	3.64593	5051	13.2758	815.464	430	985
Sample2172	30.81	91.26	Asia	China:Nam Co	grassland: montane grassland biome	Polar/Montane	-2.57917	13.275	115.984	0.3923	5	65.5	7.2	463	10.5888	1.4983	4901	13.2758	805.745	422	1075
Sample2173	30.69	91	Asia	China:Nam Co	grassland: montane grassland biome	Polar/Montane	-2.89583	12.4917	118.689	0.3877	5	57.9	7.1	420	9.52292	2.35243	4933	13.2758	807.343	410	1057
Sample2174	30.67	90.99	Asia	China:Nam Co	grassland: montane grassland biome	Polar/Montane	-3.3125	12.325	118.685	0.393	5	56.5	7.1	428	9.75661	4.23657	5012	13.2915	812.709	407	1035
Sample2175	30.69	90.96	Asia	China:Nam Co	grassland: montane grassland biome	Polar/Montane	-2.6	12.6833	119.63	0.3758	5	60	7.1	448	11.686	5.21488	4936	13.2915	806.355	407	1082
Sample2176	25.53	103.74	Asia	China:Yunnan:Qujing	anthropogenic: urban biome	Temperate	14.9375	10.625	84.2033	0.7429	33	26.1			22.9155	0.588156	1891	11.8588	473.301	964	1297
Sample2177	24.97	55.49	Asia	United Arab Emirates:Ras al Khaima	desert: subtropical desert biome	Arid	27.4333	13.7167	99.7878	0.0444	34					0.283427	110	10.149	620.789	129	2900
Sample2180	24.29	55.66	Asia	United Arab Emirates:Al Ain	desert: subtropical desert biome	Arid	28.425	14.1333	105.339	0.0395	34	60.8	8	18		0.89672	260	10.2536	667.085	125	3160
Sample2181	24.29	54.99	Asia	United Arab Emirates:Abu dhabhi	desert: subtropical desert biome	Arid	27.85	13.65	97.5086	0.0326	14	43	8.2	26		0.265615	96	10.2222	644.374	97	2966
Sample2198	8.07	98.89	Asia	Thailand:Krabi	forest: tropical coniferous forest biome	Tropical	27.7708	9.075	61.6481	1.1629	31	36.4	5.3	521	55.8009	0.0653296	13	13.2758	73.2821	2112	1816
Sample2199	8.08	98.89	Asia	Thailand:Krabi	anthropogenic: cropland biome	Tropical	27.7708	9.20833	61.5724	1.1704	31	36.6	5.4	435	52.397	0.295693	12	13.2758	74.0227	2121	1812
Sample2200	19.88	100.09	Asia	Thailand:Sob Pao	forest: tropical coniferous forest biome	Tropical	25.25	11.95	88.9218	0.8742	22	27.9	5.5	224	47.5998	4.02191	401	12.0366	274.591	1466	1676
Sample2203	19.88	100.09	Asia	Thailand:Sob Pao	forest: tropical broadleaf forest biome	Tropical	25.25	11.95	88.9218	0.8742	22	27.9	5.5	224	47.5998	4.02191	401	12.0366	274.591	1466	1676
Sample2204	19.88	100.09	Asia	Thailand:Sob Pao	anthropogenic: cropland biome	Tropical	25.25	11.95	88.9218	0.8742	22	27.9	5.5	224	47.5998	4.02191	401	12.0366	274.591	1466	1676
Sample2205	19.91	100	Asia	Thailand:Don Kaeo	anthropogenic: cropland biome	Tropical	25.4458	11.675	88.0139	0.8713	22	32	5.4	186	35.9297	1.86279	395	12.0366	274.354	1467	1683
Sample2206	30.77	90.97	Asia	China:Nam Co	grassland: montane grassland biome	Polar/Montane	-1.01667	12.7167	120.226	0.3516	5	60.4	7.6	402	8.48854	0.269844	4739	13.2915	806.686	411	1168
Sample2207	30.79	91.11	Asia	China:Nam Co	grassland: montane grassland biome	Polar/Montane	-1.44583	13.5583	118.744	0.3622	5	68.3	7.3	397	14.4292	0.591586	4768	13.2758	815.357	416	1148
Sample2208	30.64	90.78	Asia	China:Nam Co	grassland: montane grassland biome	Polar/Montane	-1.04583	11.875	120.939	0.354	5	56.5	7.3	327	8.77538	2.48788	4748	13.2915	773.382	406	1146
Sample2209	30.57	90.6	Asia	China:Nam Co	grassland: montane grassland biome	Polar/Montane	-0.845833	11.625	121.912	0.3433	0	52.9	7.3	341	9.2913	6.08316	4794	13.2915	750.004	399	1161
Sample2210	30.58	90.66	Asia	China:Nam Co	grassland: flooded grassland biome	Polar/Montane	-0.904167	11.5417	121.801	0.3456	1	52.1	7.3	334	10.909	3.63153	4776	13.2915	746.186	400	1157
Sample2211	30.6	90.69	Asia	China:Nam Co	grassland: montane grassland biome	Polar/Montane	-0.8125	10.8583	121.449	0.3501	5	53.3	7.4	446	8.82545	2.23707	4768	13.2915	742.796	403	1150
Sample2227	20.08	100.07	Asia	Thailand:Pa Aran	forest: tropical broadleaf forest biome	Tropical	25	11.8167	90.3092	0.95	10	23.1	5.5	252	47.0543	2.19451	524	11.9843	277.939	1591	1674
Sample2228	20.03	99.95	Asia	Thailand:Wiang Nuea	anthropogenic: cropland biome	Tropical	25.55	12.0333	88.8222	0.9098	22	24.8	5.5	210	30.382	1.10204	391	12.0052	277.653	1536	1688
Sample2229	20.07	100.03	Asia	Thailand:Dong Mahawan	forest: tropical broadleaf forest biome	Tropical	25.4042	11.8583	90.1863	0.9485	22	25.6	5.6	185	44.0055	0.99306	407	11.9843	279.516	1597	1683
Sample2230	20.03	100.07	Asia	Thailand:Pa Sang	anthropogenic: cropland biome	Tropical	25.4458	11.875	89.8219	0.9416	22	23.4	5.6	248	35.6179	0.78467	391	11.9843	278.751	1581	1678
Sample2231	20.08	100.1	Asia	Thailand:Pong Noi	forest: tropical broadleaf forest biome	Tropical	25.2125	11.8083	90.7587	0.9663	10	25	5.4	217	52.7697	1.4425	439	11.9843	279.294	1612	1668
Sample2232	20.22	100.1	Asia	Thailand:Yonok	anthropogenic: cropland biome	Tropical	25.5375	11.8417	92.3572	1.032	26	21.8	5.6	172	36.8234	0.0308881	375	11.9843	281.975	1744	1689
Sample2233	20.07	100.15	Asia	Thailand:Pa Sang	forest: tropical broadleaf forest biome	Tropical	25.25	11.8	90.9235	0.9711	10	22.8	5.6	205	47.0914	0.979014	434	11.9843	277.972	1625	1673
Sample2234	20.24	100.1	Asia	Thailand:Khong Ngam	forest: tropical broadleaf forest biome	Tropical	25.5458	11.825	92.6593	1.0408	26	22.7	5.5	307	39.4081	1.34854	400	11.9843	281.509	1751	1682
Sample2235	19.67	100.05	Asia	Thailand:Plong	forest: tropical broadleaf forest biome	Tropical	24.9792	11.925	87.3574	0.7999	18	42.7	5.6	431	46.8718	2.15109	507	12.0366	270.685	1337	1671
Sample2236	8.57	99.9	Asia	Thailand:Surat Thani	anthropogenic: cropland biome	Tropical	27.4292	8.94167	73.8179	1.2018	26	37.9	5.2	620	59.3183	0.0653963	15	13.1608	98.7296	2117	1761
Sample2239	19.37	100.55	Asia	Thailand:Yot	forest: tropical broadleaf forest biome	Tropical	23.6125	11.375	87.5052	0.7639	22	37.2	5.7	296	53.7185	1.61487	645	12.1412	257.533	1239	1621
Sample2240	9.1	99.29	Asia	Thailand:Thung Sai	anthropogenic: village biome	Tropical	27.125	9.15	61.7984	0.9629	43	40.5	5.4	384	62.2513	1.71178	28	13.0719	87.659	1678	1742
Sample2241	19.88	99.67	Asia	Thailand:Huai Chomphu	forest: tropical broadleaf forest biome	Tropical	23.9167	10.95	85.4112	0.8343	14	34.7	5.6	360	56.9596	3.31149	657	12.0314	275.288	1365	1635
Sample2242	8.55	99.95	Asia	Thailand:Noppring	anthropogenic: village biome	Tropical	27.575	8.5	77.2206	1.2069	26	35.3	5.6	529	44.2717	0.0412207	7	13.1608	94.1831	2142	1774
Sample2243	8.93	98.92	Asia	Thailand:Lam Kaen	anthropogenic: cropland biome	Tropical	27.0125	9.20833	57.3813	1.0331	17	46	5.4	334	60.9228	2.88744	55	13.1974	80.0603	1765	1708
Sample2244	8.08	98.89	Asia	Thailand:Krabi	forest: tropical broadleaf forest biome	Tropical	27.7708	9.20833	61.5724	1.1704	31	36.6	5.4	435	52.397	0.295693	12	13.2758	74.0227	2121	1812
Sample2259	26.37	44.77	Asia	Saudi Arabia:Al Zulfi	desert: subtropical desert biome	Arid	25.2417	15.0667	101.291	0.0539	18	44.9	7.9	55	11.6225	1.13022	610	10.1333	877.721	182	3376
Sample2261	26.3	44.93	Asia	Saudi Arabia:Al Zulfi	desert: subtropical desert biome	Arid	24.9208	14.6917	100.558	0.0558	14	42.6	7.8	28		0.410541	675	10.1333	875.55	187	3346
Sample2376	26.72	128.22	Asia	Japan:Yonaha Blue	forest: subtropical broadleaf forest biome	Temperate	20.7542	4.20833	26.5265	1.5593	18	23.2	4.7	748	58.2893	2.03215	417	9.55294	458.78	2261	1449
Sample2377	26.84	128.3	Asia	Japan:Oku	forest: subtropical coniferous forest biome	Temperate	22.475	3.66667	25.0212	1.3103	22	22.4	5	691	46.2851	3.35749	24	9.55294	442.855	2085	1591
Sample2397	39.96	115.42	Asia	China:Beijing:Donglingshan	forest: temperate broadleaf forest biome	Continental	5.94583	12.125	110.256	0.3746	18	42.4	6.7	536	24.9018	5.00131	1377	6.24837	1120.21	498	1329
Sample2398	42.38	128.09	Asia	China:Jilin:Changbaishan	forest: temperate broadleaf forest biome	Continental	2.72083	12.375	98.965	0.7598	18	31.4	5.8	1183	30.3631	0.677023	773	5.66275	1266.39	681	896
Sample2399	42.43	128.12	Asia	China:Jilin:Changbaishan	forest: temperate coniferous forest biome	Continental	3.0375	12.8083	95.7897	0.7631	38				12.3043	0.520146	718	5.66275	1303.29	692	906
Sample2409	18.53	98.39	Asia	Thailand:Mae Camp	forest: tropical broadleaf forest biome	Tropical	24.7833	11.9167	79.1972	0.6152	23	54.3	6	231	37.1818	9.82917	737	12.0993	262.43	1048	1703
Sample2410	18.53	98.38	Asia	Thailand:Mae Camp	forest: tropical broadleaf forest biome	Tropical	24.9375	11.9417	78.8924	0.6167	23	53.7	5.7	207	36.9263	7.0079	646	12.0993	264.379	1053	1707
Sample2411	5.49	116.02	Asia	Malaysia:Sabah:Ulu Kimanis	forest: tropical broadleaf forest biome	Tropical	23.8417	7.16667	20.5246	1.3153	14	32.4	5.2	685	60.4434	8.08905	702	14.102	40.7226	1987	1510
Sample2412	5.37	116.02	Asia	Malaysia:Sabah:Ulu Senagang	forest: tropical broadleaf forest biome	Tropical	23.275	7.1	19.2935	1.3341	14	32.3	5.2	591	59.7361	5.77664	814	14.102	46.2454	1961	1469
Sample2413	5.41	116.1	Asia	Malaysia:Sabah:Keningau	forest: tropical broadleaf forest biome	Tropical	22.5833	7.51667	19.9986	1.4208	14	30.5	5.1	918	62.9296	1.82894	1090	14.102	35.505	2080	1463
Sample2420	32.54	76.05	Asia	India:Himachal Pradesh:Chamba	forest: temperate coniferous forest biome	Temperate	14.1042	9.49167	93.7568	1.5323	18	44.2	5.6	1126	25.5005	9.47832	2216	11.8484	574.688	2196	1433
Sample2421	30.46	78.17	Asia	India:Uttarakhand:Dehradun	forest: temperate coniferous forest biome	Temperate	15.3667	9.73333	130.99	1.4334	22	35.6	5.7	655	28.8979	15.302	1975	11.1477	544.094	2171	1514
Sample2422	30.45	78.15	Asia	India:Uttarakhand:Dehradun	forest: temperate broadleaf forest biome	Temperate	14.55	9.26667	129.055	1.4564	14	35.4	5.9	653	32.5522	7.67512	2021	11.1477	527.688	2232	1507
Sample2423	32.54	76.01	Asia	India:Himachal Pradesh:Chamba	forest: temperate coniferous forest biome	Temperate	12.9458	9.45833	88.516	1.4891	28	42.9	5.8	801	21.46	15.0721	2089	11.8484	581.254	2086	1400
Sample2424	30.35	77.92	Asia	India:Uttarakhand:Dehradun	forest: subtropical broadleaf forest biome	Temperate	22.0208	12.375	135.131	1.0842	26	36.5	6	471	39.1294	1.64181	609	10.2797	630.031	1872	1726
Sample2425	30.57	77.3	Asia	India:Himachal Pradesh:Nahan	forest: subtropical broadleaf forest biome	Temperate	21.4875	11.0583	126.537	0.9036	31	38.4	6	528	35.2398	2.79397	753	10.4	623.805	1538	1701
Sample2490	20.02	99.18	Asia	Thailand:Huamereng	forest: tropical coniferous forest biome	Temperate	21.5792	10.875	82.7417	0.8231	17	33	5.6	398	57.8713	10.5382	1149	12.0209	271.364	1314	1596
Sample2509	56.46	32.95	Asia	Russia:Tver	forest: temperate coniferous forest biome	Continental	4.55417	7.69167	35.0816	0.9438	12	42	5.1	993	31.93	0.841317	263	3.22092	917.364	690	731
Sample2510	56.46	32.98	Asia	Russia:Tver	forest: temperate coniferous forest biome	Continental	4.59167	7.73333	34.2493	0.9402	12	43.3	5.1	1194		0.691746	247	3.22092	919.715	688	731
Sample2511	48.28	135.32	Asia	Russia:Bolshekhekhtsyrski nature reserve	forest: temperate coniferous forest biome	Continental	1.2	10.5	81.2138	0.8332	7	33.4	5.7	1050	30.427	3.27867	143	3.97908	1520.47	713	855
Sample2512	48.31	134.81	Asia	Russia:Bolshekhekhtsyrski nature reserve	forest: temperate broadleaf forest biome	Continental	1.90417	9.95833	81.9686	0.7723	28					0.972525	37	3.95294	1528.52	689	892
Sample2525	18.57	98.48	Asia	Thailand:Doi Inthanon summit	forest: tropical broadleaf forest biome	Temperate	15.5417	11.05	81.4546	0.7882	10	35	5.5	668	50.7478	8.1792	2324	12.0993	205.358	1152	1461
Sample2526	44.22	118.75	Asia	China:Inner Mongolia:Zheng Gou Saihanwula1	forest: temperate coniferous forest biome	Continental	1.3	12.5333	116.583	0.3434	14	49.9	7.3	686	27.225	8.43013	1282	5.44837	1282.1	402	1170
Sample2527	44.22	118.75	Asia	China:Inner Mongolia:Saihanwula2	forest: temperate coniferous forest biome	Continental	1.3	12.5333	116.583	0.3434	14	49.9	7.3	686	27.225	8.43013	1282	5.44837	1282.1	402	1170
Sample2528	44.22	118.73	Asia	China:Inner Mongolia:Saihanwula3	forest: temperate coniferous forest biome	Continental	1.75833	12.6833	117.514	0.3271	14	49.7	6.6	658	24.0818	2.99367	1169	5.44837	1297.42	389	1189
Sample2529	43.52	117.19	Asia	China:Inner Mongolia:Saihanwula4	forest: temperate coniferous forest biome	Continental	0.695833	13.1583	115.272	0.3051	22	52.8	7.7	426	15.3358	1.27759	1347	5.85098	1416.03	352	1153
Sample2578	25.28	99.3	Asia	China:Dashan	forest: subtropical coniferous forest biome	Temperate	13.6917	10.6	67.9694	0.7903	18	36.7	5.7	657	39.2703	10.5401	2370	12.1412	433.206	1012	1280
Sample2579	25.27	99.3	Asia	China:Fubajing	forest: subtropical coniferous forest biome	Temperate	13.4625	10.5583	68.1673	0.7987	18	34.4	6.1	751	37.6522	5.91758	2424	12.1412	433.637	1015	1270
Sample2580	27.8	99.72	Asia	China:Gym	forest: temperate broadleaf forest biome	Continental	5.67917	12.2417	67.6777	0.6321	18	32	6.3	653	25.17	9.49014	3401	12.9307	586.203	701	1108
Sample2581	27.8	99.72	Asia	China:Gym	forest: temperate coniferous forest biome	Continental	5.67917	12.2417	67.6777	0.6321	18	32	6.3	653	25.17	9.49014	3401	12.9307	586.203	701	1108
Sample2582	27.47	99.86	Asia	China:Heping-village	forest: temperate coniferous forest biome	Continental	6.89583	11.8083	65.6174	0.6871	14	31.9	6.1	691	26.6648	3.24864	3338	12.8261	571.718	761	1107
Sample2583	21.57	101.49	Asia	China:Menglun-55	forest: subtropical broadleaf forest biome	Temperate	20.6417	10.7167	80.4296	1.1309	21	31.9	5	492	51.4869	10.9361	1040	11.9477	315.233	1663	1470
Sample2584	21.58	101.17	Asia	China:Menglun-limestone forest	forest: subtropical broadleaf forest biome	Temperate	22.0042	10.4917	80.7248	1.1327	14	30.9	5.1	483	59.2184	3.90589	642	11.9477	325.251	1709	1508
Sample2585	21.57	101.57	Asia	China:Menglun-47	forest: subtropical broadleaf forest biome	Temperate	21.6833	10.55	77.8883	1.1773	18	33	5.1	448	54.9058	12.295	860	11.932	329.009	1724	1464
Sample2588	36.58	29.88	Asia	Turkey:Ciglikara	forest: temperate coniferous forest biome	Temperate	10.6458	12.225	63.9601	0.3506	22	45.9	7	401	21.5436	9.46569	1578	6.95425	757.089	567	1616
Sample2589	37.73	30.82	Asia	Turkey:Yukan-G?dere	forest: temperate coniferous forest biome	Continental	9.125	11	49.3907	0.4228	26	36.4	6.9	489	22.8783	5.33799	1630	7.36209	769.048	606	1433
Sample2795	35.56	72.21	Asia	Pakistan:Khyber Pakhtunkhwa:Kumrat	forest: temperate broadleaf forest biome	Continental	7.34583	10.4583	48.7497	0.3855	18	43.3	6.7	761	24.0158	31.6953	2810	10.7346	835.049	512	1327
Sample2796	35.46	72.24	Asia	Pakistan:Khyber Pakhtunkhwa:Lamutai	forest: temperate broadleaf forest biome	Continental	12.9667	12	50.3803	0.3816	18	38.1	6.8	389	19.3521	11.5547	2175	10.5307	826.164	569	1491
Sample2797	34.98	72.32	Asia	Pakistan:Showar Matta	forest: temperate broadleaf forest biome	Temperate	17.1	13	48.0972	0.5339	14	32.9	6.3	456	27.8107	12.0278	1492	9.72549	792.932	846	1584
Sample2798	35.46	72.24	Asia	Pakistan:Khyber Pakhtunkhwa:Upper Dir	forest: temperate coniferous forest biome	Continental	12.9667	12	50.3803	0.3816	18	38.1	6.8	389	19.3521	11.5547	2175	10.5307	826.164	569	1491
Sample2799	35.51	72.6	Asia	Pakistan:Kalam:Swat	forest: temperate broadleaf forest biome	Continental	12.1583	11.7	45.0341	0.3519	18	42.7	6.7	682	24.0951	17.4727	2157	10.8026	867.97	520	1477
Sample2800	35.5	72.6	Asia	Pakistan:Kalam:Swat	forest: temperate coniferous forest biome	Arid	12.0292	11.6417	44.4008	0.364	18	42.9	6.5	684	17.6381	5.11536	2073	10.651	855.962	532	1461
Sample2801	32.8	77.12	Asia	India:Himachal Pradesh:Zanskar Sumdo	grassland: montane grassland biome	Polar/Montane	-0.3	9.83333	47.3483	0.4094	3	43.4	7.1	669		26.2434	4283	12.5177	892.232	430	1050
Sample2802	32.8	77.12	Asia	India:Himachal Pradesh:Zanskar Sumdo	grassland: montane grassland biome	Polar/Montane	-0.3	9.83333	47.3483	0.4094	3	43.4	7.1	669		26.2434	4283	12.5177	892.232	430	1050
Sample2803	32.91	77.2	Asia	India:Himachal Pradesh:Shingo La	desert: montane desert biome	Polar/Montane	-6.60417	10.1083	57.159	0.3168	3	44.2	7	663		4.00742	4989	12.5177	898.889	284	896
Sample2804	32.91	77.2	Asia	India:Himachal Pradesh:Shingo La	desert: montane desert biome	Polar/Montane	-6.60417	10.1083	57.159	0.3168	3	44.2	7	663		4.00742	4989	12.5177	898.889	284	896
Sample2805	34.42	76.28	Asia	India:Himachal Pradesh:Kargil:Srinagar-Leh Hwy	grassland: montane grassland biome	Arid	3.16667	12.3167	74.0488	0.2115	14	39.3	7.4	264	0.17	11.9304	3242	11.9895	1106.81	254	1200
Sample2806	34.42	76.28	Asia	India:Himachal Pradesh:Kargil:Srinagar-Leh Hwy	grassland: montane grassland biome	Arid	3.16667	12.3167	74.0488	0.2115	14	39.3	7.4	264	0.17	11.9304	3242	11.9895	1106.81	254	1200
Sample2807	34.66	77.75	Asia	India:Jammu and Kashmir:Nubra valley:Sumur	desert: montane desert biome	Polar/Montane	-9.3375	10.7583	88.3191	0.1237	10	38.1	7.6	438		7.05483	5155	12.4915	997.775	106	856
Sample2808	34.66	77.75	Asia	India:Jammu and Kashmir:Nubra valley:Sumur	desert: montane desert biome	Polar/Montane	-9.3375	10.7583	88.3191	0.1237	10	38.1	7.6	438		7.05483	5155	12.4915	997.775	106	856
Sample2809	34.8	77.11	Asia	India:Jammu and Kashmir:Sayok River Valley	grassland: montane grassland biome	Polar/Montane	4.67083	11.9583	50.0749	0.0569	14	42.3	7.6	187	0.128795	32.5402	3554	12.4131	997.851	74	1298
Sample2810	34.8	77.11	Asia	India:Jammu and Kashmir:Sayok River Valley	grassland: montane grassland biome	Polar/Montane	4.67083	11.9583	50.0749	0.0569	14	42.3	7.6	187	0.128795	32.5402	3554	12.4131	997.851	74	1298
Sample2811	32.94	78.24	Asia	India:Jammu and Kashmir:Tsomoriri	grassland: montane grassland biome	Polar/Montane	-5.68333	10.9	76.0986	0.1717	6	41.8	7.4	496	3.65	11.4228	4968	12.685	913.742	175	1019
Sample2812	32.94	78.24	Asia	India:Jammu and Kashmir:Tsomoriri	grassland: montane grassland biome	Polar/Montane	-5.68333	10.9	76.0986	0.1717	6	41.8	7.4	496	3.65	11.4228	4968	12.685	913.742	175	1019
Sample2813	33.51	77.77	Asia	India:Jammu and Kashmir:Tanglang La	desert: montane desert biome	Polar/Montane	-7.12083	12.1417	83.2509	0.1485	6	39.8	7.5	205		8.3587	5277	12.5699	938.816	146	982
Sample2814	33.51	77.77	Asia	India:Jammu and Kashmir:Tanglang La	desert: montane desert biome	Polar/Montane	-7.12083	12.1417	83.2509	0.1485	6	39.8	7.5	205		8.3587	5277	12.5699	938.816	146	982
Sample2817	42.53	74.53	Asia	Kyrgyzstan:Chuy:Ala-Archa National Park	grassland: montane grassland biome	Polar/Montane	-6.66667	12.5333	50.783	0.7726	14	36.8	6.5	824		17.6142	3819	7.17908	991.854	588	761
Sample2818	42.54	74.53	Asia	Kyrgyzstan:Chuy:Ala-Archa National Park	desert: montane desert biome	Polar/Montane	-6.47083	12.625	50.8008	0.756	14	37.8	6.6	744		26.8713	3539	7.17908	989.613	584	772
Sample2819	42.54	74.54	Asia	Kyrgyzstan:Chuy:Ala-Archa National Park	desert: montane desert biome	Polar/Montane	-7.60833	12.5833	50.9128	0.8298	14	38.5	6.5	822		24.481	3847	7.17908	975.187	607	731
Sample2820	42.54	74.52	Asia	Kyrgyzstan:Chuy:Ala-Archa National Park	grassland: montane grassland biome	Polar/Montane	-5.32917	12.7083	51.2342	0.6846	14	36.5	6.6	658		19.7803	3113	7.17908	1004.7	554	809
Sample2821	42.55	74.51	Asia	Kyrgyzstan:Chuy:Ala-Archa National Park	grassland: montane grassland biome	Polar/Montane	-3.48333	12.8833	51.3602	0.5869	14	36.3	6.4	855		13.4438	2650	7.17908	1024.69	508	865
Sample2822	42.56	74.49	Asia	Kyrgyzstan:Chuy:Ala-Archa National Park	forest: temperate coniferous forest biome	Continental	-0.995833	13.0917	50.9761	0.5001	14	36.6	6.3	944		6.21402	2255	7.18432	1037.11	470	939
Sample2823	42.56	74.48	Asia	Kyrgyzstan:Chuy:Ala-Archa National Park	shrubland: montane shrubland biome	Continental	-0.454167	13.0917	52.0114	0.4838	14	36	6.5	909		20.3091	2418	7.18432	1048.56	459	948
Sample2824	42.47	74.45	Asia	Kyrgyzstan:Chuy:Ala-Archa National Park	shrubland: montane shrubland biome	Polar/Montane	-6.22917	12.3417	47.0801	0.7544	14	36.8	6.3	794		19.5916	3371	7.93202	1046.98	567	751
Sample2825	41.87	75.3	Asia	Kyrgyzstan:Naryn:Lake Son-Kul	grassland: montane grassland biome	Continental	-4.05	13.1167	66.8736	0.4268	13	33.1	7	474		2.14783	3067	8.32941	1164.76	381	892
Sample2826	41.91	75.42	Asia	Kyrgyzstan:Naryn:Lake Son-Kul	grassland: montane grassland biome	Polar/Montane	-5.45417	12.2917	69.7253	0.5341	13	32.7	6.9	717		8.95402	3607	8.32941	1050.05	437	818
Sample2863	21.57	101.57	Asia	China	unknown	Temperate	21.6833	10.55	77.8883	1.1773	18	33	5.1	448	54.9058	12.295	860	11.932	329.009	1724	1464
Sample2887	55.91	92.75	Asia	Russia:Stolby	forest: temperate coniferous forest biome	Continental	-0.566667	10.3	56.3048	0.6963	29	41.6	5.7	689	26.7644	1.2928	667	3.37255	1153	519	745
Sample2888	53.63	108.81	Asia	Russia:Mt. Vershina	shrubland: montane shrubland biome	Continental	-4.30417	9.35833	74.1746	0.6978	6	57.5	5.9	980		19.8679	1481	3.97909	1185.5	461	660
Sample2889	54.37	110.15	Asia	Russia:Kurumkan	forest: temperate coniferous forest biome	Continental	-4.33333	10.4	68.8295	0.6479	6	57.4	6.1	1199		10.6193	894	4.23529	1454.42	439	677
Sample2890	49.32	137.94	Asia	Russia:Anjuiskii National Park	forest: temperate coniferous forest biome	Continental	-1.37083	11.2583	71.7147	1.0329	5	44.3	5.1	1327		5.59073	655	4.25098	1444.1	766	741
Sample2891	11.73	92.74	Asia	India:Andaman:Mt. Harriet	forest: tropical broadleaf forest biome	Tropical	25.9917	6.2	66.5508	1.7899	24	43.5	5.1	614	66.5839	4.84433	149	12.6379	67.6499	2747	1534
Sample2892	11.89	92.78	Asia	India:Andaman:Shoal Bay	forest: tropical broadleaf forest biome	Tropical	26.45	6.03333	70.1015	1.7493	18				57.5233	2.02687	25	12.6379	73.3299	2730	1560
Sample2902	19	99.52	Asia	Thailand:Tom Hua	forest: tropical broadleaf forest biome	Tropical	24.5792	11.1083	82.9381	0.685	14	40.9	5.9	274	51.7827	4.53381	502	12.0523	281.057	1132	1652
Sample2920	12.2	100.01	Asia	Thailand:Sam Roi Yot	forest: tropical broadleaf forest biome	Tropical	27.25	7.01667	70.8043	0.5409	18	47.2	5.8	467	42.2034	1.75918	75	12.6431	125.3	969	1791
Sample2921	9.47	99.99	Asia	Thailand:Koh Samui	forest: tropical broadleaf forest biome	Tropical	27.2917	6.95	74.7365	0.9656		42.3	5.3	609		11.2768	192	13.0667	101.239	1707	1767
Sample2924	41.11	29.05	Asia	Turkey:Emirgan	woodland: woodland: temperate woodland biome	Temperate	14.4	7.58333	47.2666	0.5492	42	31.2	6.8	624		3.5771	41	5.44314	658.963	736	1339
Sample2925	41.18	28.98	Asia	Turkey:Istanbul arboretum	woodland: woodland: temperate woodland biome	Temperate	13.3958	7.15833	46.0726	0.5787	35	31.4	6.3	610	41.9655	0.935973	158	5.43268	643.426	743	1283
Sample3050	36.22	74.11	Asia	Pakistan:Naltar Valley	forest: temperate coniferous forest biome	Arid	3.5375	10.975	54.5227	0.189	22	35.4	7	557		7.49587	3241	11.3046	965.68	228	1205
Sample3051	36.3	74.68	Asia	Pakistan:Hunza	forest: temperate coniferous forest biome	Arid	11.3875	12.7417	62.9182	0.0966	22	34.9	7.5	261	6.22202	12.8842	2294	11.5137	909.661	140	1449
Sample3052	34.07	73.4	Asia	Pakistan:Nathiagali	forest: temperate coniferous forest biome	Temperate	12.2208	10.425	60.1509	1.0688	22	29	5.8	796	27.4046	6.80068	2215	9.90327	679.804	1450	1356
Sample3053	33.93	73.4	Asia	Pakistan:Murree	forest: temperate broadleaf forest biome	Temperate	13.9708	10.8583	60.0066	0.8553	38	24.9	5.8	583	33.3117	2.1567	2032	9.36471	661.587	1207	1411
Sample3054	35.35	74.8	Asia	Pakistan:Rama Meadows	forest: temperate coniferous forest biome	Continental	3.60833	11.3667	50.1841	0.383	14	39.4	6.5	907		7.26187	3193	11.4353	964.963	454	1185
Sample3064	64.69	177.7	Asia	Russia:Ugolnoi kopi	tundra biome	Continental					21					0.0869522	0	1.91373
Sample3065	64.78	177.63	Asia	Russia:Ugolnoi kopi	tundra biome	Continental	-7.57917	6.69167	32.0521	0.9152	8	40.5	5.6	1049		2.95437	64	1.91373	1256.85	360	393
Sample3066	64.73	177.39	Asia	Russia:Anadyr	tundra biome	Continental	-7.86667	6.61667	31.9311	0.9316	11	37.5	5.6	1067		6.21083	212	1.91373	1252.47	368	394
Sample3067	64.73	177.4	Asia	Russia:Anadyr	tundra biome	Continental	-7.47083	6.625	32.5746	0.8794	11	37.7	5.8	1017		8.37485	146	1.91373	1255.74	358	407
Sample3068	64.72	177.42	Asia	Russia:Anadyr	tundra biome	Continental	-7.24583	6.65833	30.1154	0.8744	18	40.4	5.9	1150		3.30534	58	1.91373	1257.78	363	415
Sample3069	64.75	177.85	Asia	Russia:Ugolnoi kopi	tundra biome	Polar/Montane	-7.575	6.41667	28.7623	1.0039	18	36.3	5.8	1409		3.14714	271	1.91373	1217.72	394	392
Sample3070	64.75	177.85	Asia	Russia:Ugolnoi kopi	tundra biome	Polar/Montane	-7.575	6.41667	28.7623	1.0039	18	36.3	5.8	1409		3.14714	271	1.91373	1217.72	394	392
Sample3071	64.75	177.88	Asia	Russia:Ugolnoi kopi	tundra biome	Polar/Montane	-7.59583	6.40833	28.9723	1.0322	4	40.1	5.7	1408		3.35232	202	1.91373	1210.36	402	389
Sample3072	64.7	177.85	Asia	Russia:Ugolnoi kopi	tundra biome	Polar/Montane	-7.82083	6.475	29.4093	1.0989	4	34.9	5.5	1170		8.62176	215	1.91373	1189.37	414	384
Sample3073	64.71	177.86	Asia	Russia:Ugolnoi kopi	tundra biome	Polar/Montane	-7.80833	6.45	31.2888	1.0768	4	35	5.6	1170		3.12345	361	1.91373	1193.74	407	377
Sample3074	64.7	177.87	Asia	Russia:Ugolnoi kopi	tundra biome	Polar/Montane	-7.64583	6.475	29.3134	1.0644	4	39.5	5.4	1295		9.90561	176	1.91373	1187.68	418	398
Sample3075	59.56	150.94	Asia	Russia:Magadan	forest: subpolar coniferous forest biome	Continental	-2.8625	5.55833	57.6886	0.8472	34					6.14528	14	2.7817	1080.6	465	548
Sample3076	59.51	150.88	Asia	Russia:Magadan	forest: subpolar coniferous forest biome	Continental	-3.74167	5.66667	59.4887	0.8637	34	39.8	4.5	907		6.75706	286	2.7817	1099.18	458	530
Sample3077	59.51	150.86	Asia	Russia:Magadan	tundra biome	Continental	-4.27083	5.85833	59.6399	0.8877	34	44	4.3	768		7.60911	425	2.7817	1111.32	461	519
Sample3078	60.84	151.8	Asia	Russia:Atka	tundra biome	Continental	-9.12083	7.90833	60.9085	0.6823	22	49.5	5.1	1912			0	3.07451	1488.19	350	512
Sample3079	60.8	151.76	Asia	Russia:Atka	tundra biome	Continental	-9.05417	7.84167	65.0401	0.656	19	50.9	4.9	1749			990	3.07451	1481.62	335	510
Sample3080	60.21	151.11	Asia	Russia:Karamgen	tundra biome	Continental	-6.9	7.23333	59.915	0.7465	22	40.8	5	779		15.5371	681	3.12157	1306.03	398	533
Sample3081	59.71	150.39	Asia	Russia:Arman	tundra biome	Polar/Montane	-6.07083	7.575	55.7979	0.9965	8	49.2	4.4	794		15.8774	624	2.75033	1245.99	505	506
Sample3082	59.7	150.41	Asia	Russia:Arman	tundra biome	Continental	-5.7625	7.49167	57.0653	0.9944	12	50.3	4.5	786		6.53103	550	2.75033	1239.25	495	513
Sample3083	59.69	150.29	Asia	Russia:Arman	forest: subpolar coniferous forest biome	Continental	-3.625	7.8	54.1068	0.9416	8	47.5	4.6	1406		4.88828	68	2.75033	1236.12	523	555
Sample3084	59.58	151.32	Asia	Russia:Ola	forest: subpolar coniferous forest biome	Continental	-2.5125	5.80833	54.6408	0.7973	24	38.2	5.4	1470		0.347805	8	2.83922	1069.9	439	550
Sample3085	59.57	151.27	Asia	Russia:Ola	forest: temperate broadleaf forest biome	Continental	-2.66667	6.1	55.5544	0.797	28	43.9	5.2	1093		2.1903	10	2.83922	1087.15	437	548
Sample3111	21.8	59.53	Asia	Oman:Sur:Al Ashkharah	desert: subtropical desert biome	Arid					8					0.637208	7	10.7085
Sample3112	16.83	53.67	Asia	Oman:Sur:Ajdarawt	desert: tropical desert biome	Arid	23.2958	9.875	78.8932	0.0627	11	49.3	7.9	211		21.7799	717	11.8954	283.945	171	2725
Sample3113	16.87	53.72	Asia	Oman:Sur:Mughsail	desert: tropical desert biome	Arid	25.75	8.56667	69.9842	0.0369	18	50	8	260		6.31	157	11.8954	231.948	92	2490
Sample3114	17.13	54.14	Asia	Oman:Salaleh:Salaleh	woodland: tropical woodland biome	Arid	25.9042	9.14167	67.9128	0.0431	38	54.9	8	186		5.81447	139	11.9007	232.872	107	2481
Sample3115	17.32	54.08	Asia	Oman:Salaleh:Qairoon Hairitti	desert: tropical desert biome	Arid	24.1208	11.575	44.7013	0.0434	18	50.8	8	110		0.842668	683	11.9007	346.872	127	2925
Sample3116	17.2	54.1	Asia	Oman:Salaleh:Enjarrt	woodland: tropical woodland biome	Arid	24.6	10.75	56.6338	0.0506	18	47.6	8	251		6.18168	505	11.9007	297.1	136	2685
Sample3117	20.87	57.16	Asia	Oman:Salaleh:Qarn Al Alam	desert: subtropical desert biome	Arid	28.2792	13.3417	76.6097	0.0324	8	51.8	8	60		0.0310195	127	11.0222	481.496	103	3170
Sample3118	21.74	57.33	Asia	Oman:Salaleh:Adam	desert: subtropical desert biome	Arid	28.4083	13.95	88.4047	0.0354	9	47.4	8.2	45		0.0923816	171	11.0066	517.897	115	3240
Sample3119	23.21	57.15	Asia	Oman:Jabal:Jabal Shams	desert: montane desert biome	Arid	21.7042	11.925	74.35	0.091	14	51.2	7.8	92	1.15164	7.19317	1292	10.7294	565.84	241	2646
Sample3120	22.94	58.43	Asia	Oman:Jabal:Al Hayema	desert: subtropical desert biome	Arid	24.7125	10.5083	57.5432	0.0849	14	53.5	8	123	1.68661	2.49658	785	10.7346	492.06	222	2614
Sample3121	22.93	58.9	Asia	Oman:Jabal:Sumayyan	desert: montane desert biome	Arid	20.6	10.4	108.805	0.3288	18	49.5	6.8	312	1.13678	0.456666	1520	10.6248	479.877	753	2289
Sample3122	22.92	58.94	Asia	Oman:Jabal:Sumayyan	desert: montane desert biome	Arid	22.5292	10.1917	95.0939	0.2124	14	49.6	7.4	241	2.46994	14.9742	820	10.6248	486.291	498	2344
Sample3123	22.78	58.48	Asia	Oman:Jabal:Ibra	shrubland: subtropical shrubland biome	Arid	26.3333	12.1833	56.7417	0.0634	31	50.4	8.1	44	1.14608	0.323126	494	10.7346	491.308	172	2712
Sample3132	51.15	83.02	Asia	Russia:Altai:Mt. Mayak	forest: subpolar coniferous forest biome	Continental	2.6875	12.7083	30.9956	0.5887	11	33.3	6.5	788	29.7284	3.51217	485	4.48627	1148.73	588	998
Sample3133	51.11	83.01	Asia	Russia:Altai:Malyi Tigirek	forest: subpolar coniferous forest biome	Continental	1.31667	12.0333	35.8318	0.6495	10	34.4	6.2	733	25.1586	14.5236	932	4.48627	1058.58	609	937
Sample3134	51.12	83.04	Asia	Russia:Altai:Malyi Tigirek	forest: subpolar coniferous forest biome	Continental	2.2625	12.3083	34.1341	0.6074	10	32.3	6.4	740	24.2542	9.70596	688	4.48627	1108.91	591	972
Sample3135	51.05	82.97	Asia	Russia:Altai:Mt. Mayak	grassland: montane grassland biome	Continental	-1.05417	11.1917	36.4824	0.8322	9	45.2	6.1	799		2.15833	1410	4.36078	1001.18	680	817
Sample3136	51.04	82.97	Asia	Russia:Altai:Mt. Mayak	forest: subpolar coniferous forest biome	Continental	-0.395833	11.3583	34.4903	0.8069	9	43.5	6.5	851		8.41875	1352	4.36078	1017.1	679	841
Sample3137	51.05	82.97	Asia	Russia:Altai:Mt. Mayak	tundra biome	Continental	-1.05417	11.1917	36.4824	0.8322	9	45.2	6.1	799		2.15833	1410	4.36078	1001.18	680	817
Sample3138	51.1	83.01	Asia	Russia:Altai:Mt. Mayak	forest: subpolar coniferous forest biome	Continental	0.2125	11.4083	36.52	0.7164	8	40	6.1	909		8.25388	1300	4.48627	1005.45	636	887
Sample2080	39.27	8.81	Europe	Italy:Siliqua	forest: mediterranean forest biome	Temperate	16.875	9.51667	54.7213	0.3492	26	34.1	6.9	380	36.5956	1.20921	88	5.96602	604.835	537	1537
Sample2081	53.12	-2.21	Europe	United Kingdom:Limekiln Woods	forest: temperate broadleaf forest biome	Temperate	8.5125	6.50833	16.0139	1.3394	33	35.5	5.7	1124	47.6805	2.40082	281	3.51373	452.006	971	724
Sample2082	39.46	8.86	Europe	Italy:Serramanna	forest: mediterranean forest biome	Temperate	17.0375	9.54167	54.8343	0.3398	30	27.8	7.4	343	30.0832	0.422035	57	5.96602	615.124	520	1529
Sample2083	39.41	8.71	Europe	Italy:Villacidro	forest: mediterranean forest biome	Temperate	15.8542	7.80833	55.2262	0.4239	14	41.2	6.9	884	22.4842	4.34921	261	5.96602	578.189	610	1438
Sample2084	39.8	8.63	Europe	Italy:Arborea	forest: mediterranean forest biome	Temperate	17.0792	8.425	57.2533	0.3547	37	37.8	7	367	37.3142	0.490391	14	5.89281	568.193	519	1462
Sample2085	39.84	8.66	Europe	Italy:Santa Giusta	forest: mediterranean forest biome	Temperate	17.0083	8.53333	56.0374	0.3583	30	36.2	7	464	32.4898	0.611831	32	5.89281	576.146	533	1487
Sample2086	39.78	9.61	Europe	Italy:Cardedu	forest: mediterranean forest biome	Temperate	17.0917	8.03333	50.6605	0.2135	18	32.3	7.4	369	30.4725	0.527975	53	5.80392	563.083	318	1489
Sample2087	39.64	9.58	Europe	Italy:Tertenia	forest: mediterranean forest biome	Temperate	16.7208	8.325	49.1481	0.2237	22	31.2	7.5	345	32.5361	2.49257	130	5.80392	572.433	333	1488
Sample2088	39.74	9.57	Europe	Italy:Jerzu	forest: mediterranean forest biome	Temperate	16.1375	7.79167	47.8473	0.2575	22	34	6.7	845	39.9119	7.94945	222	5.80392	571.47	374	1452
Sample2089	39.26	9.53	Europe	Italy:Castiadas	forest: mediterranean forest biome	Temperate	16.6958	9.00833	53.0136	0.2094	22	33	7.7	265	33.1915	1.33775	88	5.86144	563.836	306	1460
Sample2090	39.23	9.49	Europe	Italy:Castiadas	forest: mediterranean forest biome	Temperate	15.4708	8.125	49.013	0.2737	18	35.2	7	912	44.5076	8.70122	251	5.93987	561.728	381	1391
Sample2091	40.61	8.22	Europe	Italy:Alghero	forest: mediterranean forest biome	Temperate	15.8708	8.40833	55.5577	0.5722	25	39.2	6.6	624	32.2812	3.48247	27	5.63137	506.855	761	1329
Sample2093	40.61	8.22	Europe	Italy:Alghero	forest: mediterranean forest biome	Temperate	15.8708	8.40833	55.5577	0.5722	25	39.2	6.6	624	32.2812	3.48247	27	5.63137	506.855	761	1329
Sample2094	40.54	9.67	Europe	Italy:Siniscola	forest: mediterranean forest biome	Temperate	16.3917	7.11667	49.9827	0.3317	28	35.3	7.6	434	29.4768	1.81604	46	5.59477	576.746	470	1416
Sample2095	40.65	9.71	Europe	Italy:Posada	forest: mediterranean forest biome	Temperate	16.6792	7.14167	52.1144	0.3225	38	39.6	7.3	460	36.52	2.20987	23	5.59477	565.675	464	1438
Sample2096	40.7	9.72	Europe	Italy:Budoni	forest: mediterranean forest biome	Temperate	16.6833	6.81667	52.2473	0.327	35	31.2	7.2	505	30.9363	0.271333	1	5.59477	561.205	464	1418
Sample2097	40.7	9.73	Europe	Italy:Budoni	forest: mediterranean forest biome	Temperate	16.6792	6.65833	52.1366	0.3277					30.9363	0.436431	1	5.59477	558.128	464	1415
Sample51	58.3	26.65	Europe	Estonia	forest: temperate coniferous forest biome	Continental	5.2875	7.99167	34.6789	0.8564	30	56.1	5.9	964	35.6847	0.240057	80	2.76078	841.676	624	728
Sample52	58.41	26.65	Europe	Estonia	forest: temperate coniferous forest biome	Continental	5.35833	8.06667	34.6937	0.8459	39	50.9	6.1	1137	34.7175	0.700952	55	2.76078	848.487	619	731
Sample53	58.54	27.18	Europe	Estonia	forest: temperate coniferous forest biome	Continental	5.2125	7.85833	35.2805	0.8267	21	53	5.9	1158	36.0013	0.613648	42	2.70327	860.177	603	729
Sample54	58.57	26.98	Europe	Estonia	forest: temperate coniferous forest biome	Continental	5.03333	7.85	35.2841	0.8574	23	56	5.4	1197		0.310424	97	2.70327	847.663	616	718
Sample55	58.79	26.7	Europe	Estonia	forest: temperate coniferous forest biome	Continental	4.96667	8.15	35.6584	0.8588	19	47.6	5.9	1507		0.621319	86	2.70327	850.552	616	717
Sample56	58.68	25.94	Europe	Estonia	forest: temperate coniferous forest biome	Continental	5.35833	8.31667	32.4147	0.8893	39	49.6	6.2	1054	37.1929	0.309868	64	2.71372	848.87	657	738
Sample57	58.2	26.21	Europe	Estonia	forest: temperate coniferous forest biome	Continental	5.30417	8.19167	31.3722	0.8913	21	47.9	5.8	1219	34.115	0.932594	99	2.76078	840.523	649	729
Sample58	57.93	26.92	Europe	Estonia	forest: temperate coniferous forest biome	Continental	5.37083	8.05833	32.9859	0.8571	22	56.6	5.5	1196	29.1388	0.328798	99	2.86536	856.546	638	744
Sample59	58.26	26.44	Europe	Estonia	forest: temperate coniferous forest biome	Continental	5.49167	8.1	32.9191	0.8546	21	50.3	5.5	1285	27.2504	0.879191	53	2.76078	842.072	628	734
Sample60	58.25	26.44	Europe	Estonia	forest: temperate coniferous forest biome	Continental	5.42083	8.10833	32.4174	0.8696	29	49.4	5.9	841	31.2725	0.26166	64	2.76078	839.43	638	733
Sample61	57.94	27.06	Europe	Estonia	forest: temperate coniferous forest biome	Continental	5.42917	7.975	32.6791	0.8472	18	46.8	5.6	1242	33.9197	0.4199	90	2.86013	862.026	635	749
Sample62	58.46	26.82	Europe	Estonia	forest: temperate coniferous forest biome	Continental	5.2375	8.125	35.1704	0.8403	26	49.7	6	1510	29.59	0.300484	52	2.76078	853.994	610	725
Sample63	58.07	26.75	Europe	Estonia	forest: temperate coniferous forest biome	Continental	5.11667	7.85	33.9491	0.8831	26	55.9	5.6	1167	32.2902	0.337136	140	2.76078	842.468	640	724
Sample64	57.95	26.9	Europe	Estonia	forest: temperate coniferous forest biome	Continental	5.3625	7.94167	32.9708	0.8626	17	50.6	5.6	1303		0.719347	105	2.86536	852.222	641	741
Sample65	57.92	27.03	Europe	Estonia	forest: temperate coniferous forest biome	Continental	5.4125	8.00833	32.8445	0.8526	26	54.5	5.4	982		0.286384	95	2.86013	861.342	637	747
Sample66	57.93	26.91	Europe	Estonia	forest: temperate coniferous forest biome	Continental	5.37083	8.04167	32.9859	0.8575	22	56.5	5.4	1383		0.0869522	103	2.86536	855.499	638	744
Sample67	57.97	26.06	Europe	Estonia	forest: temperate coniferous forest biome	Continental	5.4125	8.125	30.8222	0.9095	17	50.4	5	1241		0.715599	59	2.87059	832.854	661	726
Sample68	58.78	26.35	Europe	Estonia	forest: temperate coniferous forest biome	Continental	5.1625	8.14167	34.7569	0.8825	17	47.3	5.8	1685	33.744	0.417319	88	2.7085	844.617	642	727
Sample69	58.28	26.38	Europe	Estonia	forest: temperate coniferous forest biome	Continental	5.29583	8.09167	32.0741	0.8752	22	49.3	5.4	943	34.3133	0.957973	79	2.76078	839.235	640	731
Sample70	58.27	26.39	Europe	Estonia	forest: temperate coniferous forest biome	Continental	5.30833	8.1	31.9013	0.875	22	49.2	6	883	35.0709	1.02577	88	2.76078	839.821	641	732
Sample71	58.78	26.36	Europe	Estonia	forest: temperate coniferous forest biome	Continental	5.17083	8.15833	34.6683	0.8804	17	45.9	5.8	1587	33.6908	0.417319	84	2.7085	844.602	641	728
Sample72	58.74	26.66	Europe	Estonia	forest: temperate coniferous forest biome	Continental	5.00833	8.15	34.6442	0.8648	21	43.1	6	1293	32.6063	0.360166	92	2.70327	852.938	623	720
Sample73	58.46	26.81	Europe	Estonia	forest: temperate coniferous forest biome	Continental	5.225	8.11667	35.0238	0.8427	26	50.8	6.2	1088	29.1167	0.665551	50	2.76078	854.716	611	725
Sample74	58.75	26.51	Europe	Estonia:Kuremaa Metskond	forest: temperate coniferous forest biome	Continental	5.01667	8.03333	34.1896	0.8843	26	54	5.7	1377	31.2379	1.25852	121	2.70327	846.394	639	722
Sample75	58.17	26.14	Europe	Estonia	forest: temperate coniferous forest biome	Continental	5.41667	7.9	30.9431	0.8928	14	49.8	5.6	1170	33.9521	0.552579	56	2.76078	829.448	648	725
Sample76	58.25	27.29	Europe	Estonia	forest: temperate coniferous forest biome	Continental	5.375	7.8	35.2159	0.8255	10	52	5.6	1048	36.956	0.128354	48	2.76078	861.018	611	740
Sample77	58.55	26.87	Europe	Estonia	forest: temperate coniferous forest biome	Continental	5.15833	7.91667	35.3369	0.8423	19	53.7	5.6	1531	33.8356	0.363455	65	2.70327	845.098	608	721
Sample78	58.52	26.96	Europe	Estonia	forest: temperate coniferous forest biome	Continental	5.09167	7.98333	35.3933	0.8451	12	51.4	5.6	1466		0.290786	69	2.70327	853.159	609	720
Sample79	58.75	26.66	Europe	Estonia	forest: temperate coniferous forest biome	Continental	5.025	8.18333	35.0128	0.8613	21	45.2	5.7	1394	33.3656	0.517465	89	2.70327	852.026	621	720
Sample80	58.42	27.01	Europe	Estonia	forest: temperate coniferous forest biome	Continental	5.19583	8.09167	35.7406	0.8249	12	47.4	5.7	1324	30.4875	0.276711	64	2.76078	860.807	604	732
Sample81	58.34	26.89	Europe	Estonia:Kaagvere	forest: temperate coniferous forest biome	Continental	5.33333	8.06667	36.3332	0.8257	26	52.8	5.8	1349	32.2229	0.364916	55	2.76078	854.978	605	732
Sample82	58.56	26.84	Europe	Estonia	forest: temperate coniferous forest biome	Continental	5.16667	7.9	35.9272	0.8522	13	48.5	5.7	1398		0.0802995	66	2.70327	842.435	615	721
Sample138	58.2	26.67	Europe	Estonia	forest: temperate coniferous forest biome	Continental	5.225	7.91667	34.0936	0.8619	18	55.6	5.5	1319	31.9783	0.523048	96	2.76078	839.1	625	723
Sample139	58.78	26.35	Europe	Estonia	forest: temperate coniferous forest biome	Continental	5.1625	8.14167	34.7569	0.8825	17	47.3	5.8	1685	33.744	0.417319	88	2.7085	844.617	642	727
Sample140	57.87	26.13	Europe	Estonia	forest: temperate coniferous forest biome	Continental	5.39167	8.2	30.0309	0.9027	16	54.1	5.1	1514		0.875089	59	2.87059	826.413	655	725
Sample141	57.92	27.04	Europe	Estonia	forest: temperate coniferous forest biome	Continental	5.425	7.98333	33.2185	0.8475	26	54.1	5.2	1106		0.0617926	96	2.86013	860.609	634	747
Sample142	58.07	26.75	Europe	Estonia	forest: temperate coniferous forest biome	Continental	5.11667	7.85	33.9491	0.8831	26	55.9	5.6	1167	32.2902	0.337136	140	2.76078	842.468	640	724
Sample143	58	26.61	Europe	Estonia	forest: temperate coniferous forest biome	Continental	5.025	7.81667	32.5879	0.9161	26	54.6	5.5	1151		0.533043	151	2.86536	832.511	652	711
Sample144	58.66	26.11	Europe	Estonia	forest: temperate coniferous forest biome	Continental	5.34583	8.24167	33.1625	0.8972	18	39.3	6	1042		0.12562	69	2.7085	849.303	656	731
Sample145	58.05	26.83	Europe	Estonia	forest: temperate coniferous forest biome	Continental	5.21667	7.81667	32.921	0.863	19	58.9	5.1	1423	33.915	0.128225	140	2.76078	843.007	633	733
Sample146	58.21	26.69	Europe	Estonia	forest: temperate coniferous forest biome	Continental	5.24167	7.93333	33.9977	0.855	18	56.4	5.9	1048	32.9798	0.498581	85	2.76078	839.832	620	725
Sample147	58.59	27.03	Europe	Estonia	forest: temperate coniferous forest biome	Continental	4.95833	7.9	35.8187	0.852	18	53.8	5.2	1610	32.3496	0.301247	99	2.70327	851.21	610	715
Sample148	58.2	26.74	Europe	Estonia	forest: temperate coniferous forest biome	Continental	5.20833	7.95	34.2009	0.8581	14	57.1	5.5	892	32.8691	0.281089	93	2.76078	842.372	621	724
Sample149	58.19	26.8	Europe	Estonia	forest: temperate coniferous forest biome	Continental	5.27083	8.025	34.5302	0.8503	26	59.8	5.5	945	37.3408	0.997414	73	2.76078	847.331	618	726
Sample150	58.2	26.67	Europe	Estonia	forest: temperate coniferous forest biome	Continental	5.225	7.91667	34.0936	0.8619	18	55.6	5.5	1319	31.9783	0.523048	96	2.76078	839.1	625	723
Sample151	58.43	26.56	Europe	Estonia	forest: temperate coniferous forest biome	Continental	5.4125	8.04167	34.3317	0.8426	26	51	6.3	983		0.501557	46	2.76078	844.396	619	734
Sample152	58.79	26.69	Europe	Estonia	forest: temperate coniferous forest biome	Continental	5.02083	8.175	34.804	0.8567	19	45.3	5.9	1971	34.3192	0.647713	78	2.70327	852.226	617	720
Sample153	57.94	26.89	Europe	Estonia	forest: temperate coniferous forest biome	Continental	5.35833	7.96667	32.8332	0.8631	22	51.8	5.4	1399		0.283892	110	2.86536	850.841	640	741
Sample154	58.29	26.63	Europe	Estonia	forest: temperate coniferous forest biome	Continental	5.33333	8.01667	34.5222	0.8539	30	54.6	6.2	1038	36.3508	0.280895	73	2.76078	843.891	623	729
Sample155	58.12	26.71	Europe	Estonia	forest: temperate coniferous forest biome	Continental	5.0875	7.80833	33.9037	0.8916	18	59.7	5.5	1340	31.4	0.0289841	136	2.76078	837.925	640	717
Sample156	58.34	27.11	Europe	Estonia	forest: temperate coniferous forest biome	Continental	5.34583	7.94167	34.5002	0.8266	26	51	5.6	1472	33.51	0.062362	48	2.76078	854.199	610	737
Sample157	57.91	26.1	Europe	Estonia	forest: temperate coniferous forest biome	Continental	5.35	8.13333	30.3231	0.9164	11	53.8	5.5	1397		1.11516	68	2.87059	828.879	663	723
Sample158	58.36	26.96	Europe	Estonia	forest: temperate coniferous forest biome	Continental	5.3375	8.05833	35.8061	0.8295	18	52.3	5.5	1243	30.5582	0.210278	46	2.76078	859.85	608	732
Sample159	58.02	26.82	Europe	Estonia	forest: temperate coniferous forest biome	Continental	5.1375	7.775	33.0503	0.8779	12	58.8	5.3	1392		0.522013	148	2.76078	840.949	639	727
Sample160	57.99	26.07	Europe	Estonia	forest: temperate coniferous forest biome	Continental	5.40833	8.03333	30.3428	0.9069	17	52.4	5.3	1167		0.399847	69	2.87059	828.846	660	727
Sample161	58.12	26.42	Europe	Estonia	forest: temperate coniferous forest biome	Continental	5.2625	7.975	32.7207	0.8918	14	58.1	5.5	1107		0.741764	109	2.76078	831.103	645	723
Sample162	57.68	26.93	Europe	Estonia	forest: temperate coniferous forest biome	Continental	5.1	7.63333	30.1949	0.9358	20	50.9	5.1	1037	33.8375	0.746521	174	2.86536	840.225	676	722
Sample163	58.69	25.95	Europe	Estonia	forest: temperate coniferous forest biome	Continental	5.34583	8.29167	32.5228	0.8899	20	41.4	5.9	1062	30.7117	0.285922	73	2.71372	850.514	657	738
Sample164	58.3	26.65	Europe	Estonia	forest: temperate coniferous forest biome	Continental	5.2875	7.99167	34.6789	0.8564	30	56.1	5.9	964	35.6847	0.240057	80	2.76078	841.676	624	728
Sample165	58.12	26.61	Europe	Estonia	forest: temperate coniferous forest biome	Continental	5.01667	7.76667	32.9013	0.9104	22	53.2	5.7	1376	33.6117	0.420356	162	2.76078	832.358	649	712
Sample166	58.13	26.62	Europe	Estonia	forest: temperate coniferous forest biome	Continental	5.00417	7.75833	33.2436	0.9117	22	53.5	5.6	1022		0.411326	170	2.76078	831.438	650	712
Sample167	57.75	26.92	Europe	Estonia	forest: temperate coniferous forest biome	Continental	5.175	7.71667	30.9194	0.9111	17	50.7	5.1	1187	30.3985	0.669179	171	2.86536	843.312	666	730
Sample168	57.75	26.92	Europe	Estonia	forest: temperate coniferous forest biome	Continental	5.175	7.71667	30.9194	0.9111	17	50.7	5.1	1187	30.3985	0.669179	171	2.86536	843.312	666	730
Sample169	58.19	26.79	Europe	Estonia	forest: temperate coniferous forest biome	Continental	5.22083	7.975	34.2582	0.8554	26	60.7	5.4	1083	32.2908	1.22768	82	2.76078	846.142	621	725
Sample170	58.42	27.03	Europe	Estonia	forest: temperate coniferous forest biome	Continental	5.20417	8.075	35.6902	0.8229	10	51.1	5.5	1297		0.20614	61	2.76078	860.493	603	732
Sample171	58.07	26.75	Europe	Estonia	forest: temperate coniferous forest biome	Continental	5.11667	7.85	33.9491	0.8831	26	55.9	5.6	1167	32.2902	0.337136	140	2.76078	842.468	640	724
Sample172	58.74	26.5	Europe	Estonia	forest: temperate coniferous forest biome	Continental	5.09167	8.06667	34.1465	0.8784	26	51.5	5.9	1153	30.0471	0.438035	103	2.70327	847.82	636	724
Sample173	57.93	26.05	Europe	Estonia	forest: temperate coniferous forest biome	Continental	5.4	8.16667	29.7016	0.9189	11	54.3	5.4	1307	31.63	0.260855	65	2.87059	833.323	667	725
Sample174	58.78	26.36	Europe	Estonia	forest: temperate coniferous forest biome	Continental	5.17083	8.15833	34.6683	0.8804	17	45.9	5.8	1587	33.6908	0.417319	84	2.7085	844.602	641	728
Sample175	58.11	26.58	Europe	Estonia	forest: temperate coniferous forest biome	Continental	5.03333	7.8	33.232	0.9115	26	54.1	5.7	1086	32.0875	0.0548725	159	2.76078	833.226	651	714
Sample176	58.71	26.24	Europe	Estonia	forest: temperate coniferous forest biome	Continental	5.2375	8.14167	34.0024	0.8851	20	50.4	5.7	1535	32.296	0.0628857	82	2.7085	841.679	645	728
Sample177	58.31	26.5	Europe	Estonia	forest: temperate coniferous forest biome	Continental	5.3125	8.05833	32.9305	0.8659	17	52.9	5.8	1382	31.7667	0.449878	85	2.76078	840.155	633	730
Sample178	58.52	26.96	Europe	Estonia	forest: temperate coniferous forest biome	Continental	5.09167	7.98333	35.3933	0.8451	12	51.4	5.6	1466		0.290786	69	2.70327	853.159	609	720
Sample179	58.2	26.74	Europe	Estonia	forest: temperate coniferous forest biome	Continental	5.20833	7.95	34.2009	0.8581	14	57.1	5.5	892	32.8691	0.281089	93	2.76078	842.372	621	724
Sample180	58.54	27.16	Europe	Estonia	forest: temperate coniferous forest biome	Continental	5.1875	7.89167	35.5604	0.8266	22	54.3	5.5	1353		0.250586	49	2.70327	857.786	602	728
Sample181	58.34	27.05	Europe	Estonia	forest: temperate coniferous forest biome	Continental	5.29167	8.01667	35.2404	0.8263	26	52	5.4	1270	30.6563	0.124724	61	2.76078	857.899	608	735
Sample182	58.67	26.1	Europe	Estonia	forest: temperate coniferous forest biome	Continental	5.33333	8.2	32.8111	0.8991	26	41.1	5.9	1122	32.8042	0.260855	63	2.7085	848.248	658	731
Sample183	58.58	27	Europe	Estonia	forest: temperate coniferous forest biome	Continental	4.95417	7.875	35.4787	0.8559	26	54.2	5.3	1535	32.5983	0.376177	104	2.70327	849.712	612	715
Sample226	58.28	26.69	Europe	Estonia	forest: temperate coniferous forest biome	Continental	5.30833	7.96667	34.8515	0.8458	18	56.8	6.1	1156	31.3633	0.599311	75	2.76078	841.135	617	729
Sample227	58.41	26.56	Europe	Estonia	forest: temperate coniferous forest biome	Continental	5.40833	8.01667	34.7776	0.8419	18	51.7	5.6	1073	36.3078	0.713312	46	2.76078	845.127	618	734
Sample228	58.09	26.44	Europe	Estonia	forest: temperate coniferous forest biome	Continental	5.18333	7.95	32.3776	0.9078	22	51.8	5.2	1125	28.7881	0.402551	108	2.76078	830.734	652	718
Sample229	58.26	27.27	Europe	Estonia	forest: temperate coniferous forest biome	Continental	5.37083	7.79167	34.9633	0.8283	18	50.7	5.6	1609	37.5113	0.0622516	46	2.76078	857.336	612	738
Sample230	58.49	26.5	Europe	Estonia	forest: temperate coniferous forest biome	Continental	5.35833	8.03333	34.0386	0.8676	15	48.7	5.6	1595	35.6825	0.229266	62	2.76078	836.426	632	728
Sample231	58.75	26.28	Europe	Estonia	forest: temperate coniferous forest biome	Continental	5.2375	8.09167	34.4714	0.8901	18	49	5.8	1464	32.521	0.318822	85	2.7085	842.224	648	728
Sample232	58.6	26.98	Europe	Estonia	forest: temperate coniferous forest biome	Continental	4.96667	7.88333	36.0105	0.8587	16	52.5	5.6	1306	33.7544	0.0869522	104	2.70327	848.891	615	716
Sample233	58.42	26.62	Europe	Estonia	forest: temperate coniferous forest biome	Continental	5.36667	8.06667	34.6541	0.8443	26	49.6	6	1191	40.2873	0.35218	56	2.76078	846	618	731
Sample234	58.11	26.4	Europe	Estonia	forest: temperate coniferous forest biome	Continental	5.27917	7.975	33.0498	0.8902	26	59.2	5.2	1165	30.8483	0.835689	101	2.76078	831.558	644	723
Sample235	57.71	26.81	Europe	Estonia	forest: temperate coniferous forest biome	Continental	5.35417	7.725	31.2578	0.9018	12	54	5.3	1198	29.5475	0.0615086	123	2.86536	836.515	664	736
Sample236	57.7	26.74	Europe	Estonia	forest: temperate coniferous forest biome	Continental	5.4375	7.85833	31.5411	0.8932	16	59.1	5.4	1080	35.5575	0.726187	108	2.86536	837.752	655	736
Sample237	58.7	26.24	Europe	Estonia	forest: temperate coniferous forest biome	Continental	5.24583	8.125	34.6845	0.8857	12	54.5	5.7	1791	30.2453	0.16983	84	2.7085	842.06	644	729
Sample238	58.55	26.93	Europe	Estonia	forest: temperate coniferous forest biome	Continental	5.12917	7.875	35.7105	0.8501	18	55.3	5.5	1666	34.1909	0.758455	70	2.70327	846.459	611	718
Sample239	58.16	26.42	Europe	Estonia	forest: temperate coniferous forest biome	Continental	5.35417	8.05833	32.8161	0.877	14	51.2	5.7	1105		0.659263	79	2.76078	834.521	637	726
Sample240	58.1	26.54	Europe	Estonia	forest: temperate coniferous forest biome	Continental	5.09583	7.875	32.8556	0.9039	26	54.3	5.3	1327		0.798059	138	2.76078	832.65	648	716
Sample241	58.27	26.64	Europe	Estonia	forest: temperate coniferous forest biome	Continental	5.33333	7.98333	34.3344	0.85	22	52.1	6.1	1030	30.8354	0.361075	80	2.76078	842.311	621	730
Sample242	57.87	26.12	Europe	Estonia	forest: temperate coniferous forest biome	Continental	5.42083	8.20833	29.889	0.9056	16	49.9	5.4	1693		0.266486	56	2.87059	828.102	657	725
Sample243	57.96	26.76	Europe	Estonia	forest: temperate coniferous forest biome	Continental	5.175	7.78333	33.345	0.8909	18	57.9	5.3	1157		0.81245	136	2.86536	841.863	645	723
Sample244	58	26.62	Europe	Estonia	forest: temperate coniferous forest biome	Continental	5.01667	7.81667	32.385	0.9146	26	56	5.5	1223		0.466949	152	2.86536	833.381	653	713
Sample245	58.79	26.69	Europe	Estonia	forest: temperate coniferous forest biome	Continental	5.02083	8.175	34.804	0.8567	19	45.3	5.9	1971	34.3192	0.647713	78	2.70327	852.226	617	720
Sample246	58.04	26.38	Europe	Estonia	forest: temperate coniferous forest biome	Continental	5.02083	7.85833	31.7552	0.9281	22	49.6	5.7	1162	33.1592	0.185881	161	2.76078	826.021	661	712
Sample247	58.28	26.64	Europe	Estonia	forest: temperate coniferous forest biome	Continental	5.33333	7.98333	34.2358	0.8484	14	58.5	6	1108	35.5521	0.124576	73	2.76078	842.311	619	729
Sample248	58.52	26.96	Europe	Estonia	forest: temperate coniferous forest biome	Continental	5.09167	7.98333	35.3933	0.8451	12	51.4	5.6	1466		0.290786	69	2.70327	853.159	609	720
Sample249	58.27	26.64	Europe	Estonia	forest: temperate coniferous forest biome	Continental	5.33333	7.98333	34.3344	0.85	22	52.1	6.1	1030	30.8354	0.361075	80	2.76078	842.311	621	730
Sample250	58.16	27.04	Europe	Estonia	forest: temperate coniferous forest biome	Continental	5.3375	7.90833	34.8912	0.8395	14	53.3	5.5	1105	30.4692	0.219763	73	2.76078	854.34	618	736
Sample251	58.59	27.14	Europe	Estonia	forest: temperate coniferous forest biome	Continental	5.1625	8.025	35.6125	0.8294	26	54.1	6.2	1166		0.289838	39	2.70327	862.626	603	727
Sample252	58.58	26.93	Europe	Estonia	forest: temperate coniferous forest biome	Continental	5.1	7.93333	35.3933	0.847	22	51.6	5.9	1241	35.4708	0.571234	69	2.70327	847.695	609	718
Sample253	58.77	26.32	Europe	Estonia	forest: temperate coniferous forest biome	Continental	5.175	8.08333	34.9488	0.8858	21	51.9	5.9	1631	30.3275	0.29268	86	2.7085	842.856	643	725
Sample254	59.24	25.67	Europe	Estonia	forest: temperate coniferous forest biome	Continental	5.0875	7.90833	32.4733	0.942	25	59.3	5	1275		0.578502	85	2.60392	831.945	683	725
Sample255	58.08	26.75	Europe	Estonia	forest: temperate coniferous forest biome	Continental	5.12083	7.84167	33.919	0.8872	18	56.6	5.6	1131		0.463985	132	2.76078	842.775	642	723
Sample256	57.93	26.06	Europe	Estonia	forest: temperate coniferous forest biome	Continental	5.4625	8.15833	30.0259	0.9067	11	53.7	5.1	1562	28.0683	0.99361	64	2.87059	834.318	660	727
Sample257	57.36	24.62	Europe	Latvia:Limbazi:Vidrizi	forest: temperate coniferous forest biome	Continental	5.45	6.88333	32.8388	0.9504	26	50.4	5.6	1428	35.1067	0.202888	52	2.90719	830.312	660	694
Sample258	56.56	24.08	Europe	Latvia:Iecava: Saktas	forest: temperate coniferous forest biome	Continental	6.37917	7.35833	30.3844	0.8225	17	45.4	5.9	1176	34.0581	0.351759	20	2.96471	797.135	612	744
Sample259	56.55	24.07	Europe	Latvia:Iecava:Medni	forest: temperate coniferous forest biome	Continental	6.41667	7.4	30.5997	0.8107	22	39.6	5.7	1012	32.8614	0.999421	16	2.96471	798.659	605	746
Sample260	56.36	24.32	Europe	Latvia:Bauska:Ceraukste	forest: temperate coniferous forest biome	Continental	6.49167	7.4	29.9669	0.7924	25	39.9	6.3	967	37.3308	0.37646	31	3.02745	797.037	599	755
Sample261	56.92	22.69	Europe	Latvia:Tukums:Aizlolas	forest: temperate coniferous forest biome	Continental	6.18333	7.33333	30.1362	0.8894	16	57.2	6.5	689	35.3899	0.457989	84	2.95948	752.85	648	728
Sample262	57.07	22.77	Europe	Latvia:Kandava:Matisi	forest: temperate coniferous forest biome	Continental	6.0875	7.425	30.3367	0.9035	26	56	5.6	1366	35.8783	0.72998	87	2.84445	753.375	653	722
Sample263	57.06	22.72	Europe	Latvia:Kanadva:Viesturi	forest: temperate coniferous forest biome	Continental	6.05	7.33333	30.2567	0.9191	22	51.3	5.4	727	38.2608	0.318218	80	2.84445	749.027	660	718
Sample264	56.61	23.16	Europe	Latvia:Dobele:Mezansi	forest: temperate coniferous forest biome	Continental	6.52083	7.025	32.9283	0.7754	22	49.6	5.6	1014	33.4523	0.160649	66	2.95948	794.82	590	760
Sample265	56.31	25.46	Europe	Latvia:Viesite:Odzani	forest: temperate coniferous forest biome	Continental	5.91667	7.55	27.3	0.8826	21	53.1	5.8	1446	37.6775	0.1671	90	3.07974	842.783	658	745
Sample266	56.26	25.42	Europe	Latvia:Viesite:Palsani	forest: temperate coniferous forest biome	Continental	5.95417	7.55833	26.9638	0.8682	21	53	5.5	1136	36.8354	0.758135	92	3.07974	844.316	652	750
Sample267	56.63	24.35	Europe	Latvia:Iecava:Dzelzamurs	forest: temperate coniferous forest biome	Continental	6.15833	7.15	29.9745	0.8543	14	49.9	5.3	1404	28.4582	0.757916	43	2.96471	794.575	626	732
Sample268	56.66	24.34	Europe	Latvia:Iecava:Dzelzamurs	forest: temperate coniferous forest biome	Continental	6.17083	7.05833	30.3913	0.8513	22	51.5	5.2	1302	28.3979	0.475576	36	2.96471	796.145	625	734
Sample269	56.57	24.15	Europe	Latvia:Iecava:Gaili	forest: temperate coniferous forest biome	Continental	6.35417	7.425	30.0704	0.8225	26	34.7	6.9	1278	32.345	0.180194	15	2.96471	797.819	611	742
Sample270	56.57	24.15	Europe	Latvia:Iecava:Gaili	forest: temperate coniferous forest biome	Continental	6.35417	7.425	30.0704	0.8225	26	34.7	6.9	1278	32.345	0.180194	15	2.96471	797.819	611	742
Sample271	57.05	22.7	Europe	Latvia:Kandava:Strauti	forest: temperate coniferous forest biome	Continental	6.075	7.33333	30.5261	0.9136	14	52	5.4	1246	34.4601	0.318164	82	2.84445	748.421	659	721
Sample272	57.08	22.68	Europe	Latvia:Kandava: Skruskopi	forest: temperate coniferous forest biome	Continental	6.01667	7.3	30.976	0.9289	14	56	6.4	1061	35.0079	0.281702	92	2.84445	748.8	662	712
Sample273	56.48	24.11	Europe	Latvia:Bauska:Mezotne	forest: temperate coniferous forest biome	Continental	6.36667	7.36667	30.24	0.8156	26	40.1	5.8	1459	35.9393	0.213996	28	3.02745	792.672	604	740
Sample274	57.04	22.67	Europe	Latvia:Kandava	forest: temperate coniferous forest biome	Continental	6.125	7.36667	30.5663	0.9086	14	53.4	5.4	1093	35.6527	0.552086	77	2.84445	751.7	657	723
Sample275	56.61	22.85	Europe	Latvia:Auceile	forest: temperate coniferous forest biome	Continental	6.2375	7.20833	29.325	0.8609	24	52.2	6.6	900	34.3935	0.683733	99	2.95948	776.493	637	739
Sample276	56.3	27.29	Europe	Latvia:Rezekne:Malta	forest: temperate coniferous forest biome	Continental	5.26667	7.25	30.4537	0.8402	14	58.5	5.2	1246		0.640267	159	3.10065	862.774	622	740
Sample277	57.19	21.9	Europe	Latvia:Ugale:Rapati	forest: temperate coniferous forest biome	Continental	6.46667	6.48333	32.5792	0.9563	13	57.7	5.2	739	33.3502	0.538037	52	2.84445	753.547	711	743
Sample278	57.66	26.1	Europe	Latvia:Valka	forest: temperate coniferous forest biome	Continental	5.475	8.08333	31.9683	0.9101	10	51.2	5.3	1582	31.7154	0.0614499	67	2.87059	818.439	659	724
Sample279	57	23.43	Europe	Latvia:Kemeri:Caukciems	forest: temperate coniferous forest biome	Continental	6.5625	6.90833	31.4601	0.8368	18	52.6	5.4	1032	26.1947	0.800211	16	2.95948	773.267	615	734
Sample280	56.77	22.6	Europe	Latvia:Remte:Sturisi	forest: temperate coniferous forest biome	Continental	6.1	7.25	28.7466	0.9178	16	48.6	5.6	949	33.1183	1.06412	117	2.95948	751.511	664	723
Sample281	56.9	25.18	Europe	Latvia:Ogre:Keipene	forest: temperate coniferous forest biome	Continental	5.475	6.96667	30.1104	0.9578	22	59.7	5.6	1027	37.2243	0.257033	117	3.02745	848.513	690	720
Sample282	56.84	25.39	Europe	Latvia:Ogre:Taurupe	forest: temperate coniferous forest biome	Continental	5.49583	7.15833	29.2997	0.9546	13	55.6	5.4	1141	35.1292	0.356246	111	3.02745	850.664	691	723
Sample283	56.86	24.79	Europe	Latvia:Ikskile:Turkalne	forest: temperate coniferous forest biome	Continental	5.75	7.06667	29.7738	0.9186	18	60	4.9	1515	36.3457	0.281184	66	2.99608	822.792	660	718
Sample284	56.72	22.99	Europe	Latvia:Jaunpils	forest: temperate coniferous forest biome	Continental	6.275	7.33333	31.3636	0.8296	26	54.8	6.9	755	30.2819	0.335683	84	2.95948	785.68	617	743
Sample285	56.74	24.94	Europe	Latvia:Lielvarde	forest: temperate coniferous forest biome	Continental	5.75833	7.36667	29.1146	0.9078	26	59.5	5.5	1286	38.6668	0.408748	75	2.99608	836.649	663	730
Sample286	56.69	25.2	Europe	Latvia:Skriveri	forest: temperate coniferous forest biome	Continental	5.77917	7.30833	28.2538	0.9118	18	50.8	5.4	1280	32.3132	0.335844	94	3.02745	848.256	674	739
Sample287	57.05	25.08	Europe	Latvia:More	forest: temperate coniferous forest biome	Continental	5.23333	6.91667	31.5209	0.98	16	50.8	5.5	1018	35.351	0.106574	137	2.95948	845.508	691	705
Sample288	58.4	26.66	Europe	Estonia	forest: temperate coniferous forest biome	Continental	5.3375	8.10833	34.6577	0.8404	42	53.5	6	1185	29.2175	0.440624	62	2.76078	848.968	616	732
Sample289	58.28	27.34	Europe	Estonia	forest: temperate coniferous forest biome	Continental	5.37917	7.64167	34.7027	0.8291	18	53.1	5.4	1152	33.67	0.581328	48	2.76078	857.975	612	738
Sample290	58.09	26.45	Europe	Estonia	forest: temperate coniferous forest biome	Continental	5.19583	7.925	32.6818	0.9033	14	50.5	5.3	1012	30.1646	0.231871	111	2.76078	832.961	650	719
Sample291	58.69	26.25	Europe	Estonia	forest: temperate coniferous forest biome	Continental	5.24583	8.15833	34.117	0.8867	12	52.8	5.5	1391		0.238483	77	2.7085	841.364	646	728
Sample292	58.49	26.49	Europe	Estonia	forest: temperate coniferous forest biome	Continental	5.3625	8.025	34.1089	0.8641	12	48.6	5.6	1594	34.4479	0.0625722	64	2.76078	835.837	630	729
Sample293	58.42	26.56	Europe	Estonia	forest: temperate coniferous forest biome	Continental	5.4	8.03333	34.1531	0.8457	26	52.6	5.6	1114	35.0899	0.221369	51	2.76078	844.051	621	734
Sample294	58.33	26.53	Europe	Estonia	forest: temperate coniferous forest biome	Continental	5.31667	8.06667	33.7877	0.855	26	49.7	6	1248	32.6033	0.403434	74	2.76078	841.847	626	732
Sample295	58.3	26.68	Europe	Estonia	forest: temperate coniferous forest biome	Continental	5.30417	8.00833	33.9133	0.8578	24	58	6.2	1278	28.9729	0.560798	70	2.76078	843.061	625	728
Sample296	58.23	26.68	Europe	Estonia	forest: temperate coniferous forest biome	Continental	5.20417	7.925	33.9912	0.8571	26	50.4	5.6	1073	30.9292	0.409488	93	2.76078	841.826	622	725
Sample297	58.11	26.4	Europe	Estonia	forest: temperate coniferous forest biome	Continental	5.27917	7.975	33.0498	0.8902	26	59.2	5.2	1165	30.8483	0.835689	101	2.76078	831.558	644	723
Sample298	58.09	26.45	Europe	Estonia	forest: temperate coniferous forest biome	Continental	5.19583	7.925	32.6818	0.9033	14	50.5	5.3	1012	30.1646	0.231871	111	2.76078	832.961	650	719
Sample299	58.44	26.73	Europe	Estonia	forest: temperate coniferous forest biome	Continental	5.32917	8.14167	35.0166	0.8382	35	52.5	5.8	1227	33.06	0.103085	57	2.76078	851.022	615	733
Sample300	58.22	26.28	Europe	Estonia	forest: temperate coniferous forest biome	Continental	5.35833	8.2	31.2316	0.8806	22	46.8	5.6	1098		0.236698	80	2.76078	842.493	645	732
Sample301	58.16	26.42	Europe	Estonia	forest: temperate coniferous forest biome	Continental	5.35417	8.05833	32.8161	0.877	14	51.2	5.7	1105		0.659263	79	2.76078	834.521	637	726
Sample302	58.09	26.53	Europe	Estonia	forest: temperate coniferous forest biome	Continental	5.12083	7.89167	32.7548	0.9	26	55.2	5.5	1149	36.0496	0.933564	142	2.76078	834.044	648	719
Sample303	58.54	26.87	Europe	Estonia	forest: temperate coniferous forest biome	Continental	5.14167	7.93333	35.2887	0.8392	19	53	5.8	1277	35.0248	0.503187	69	2.70327	847	608	724
Sample304	57.99	26.62	Europe	Estonia	forest: temperate coniferous forest biome	Continental	5.04167	7.78333	32.7696	0.9142	26	56.6	5.2	1548		0.605706	147	2.86536	833.633	652	713
Sample305	58.03	26.47	Europe	Estonia	forest: temperate coniferous forest biome	Continental	5.10833	7.85	31.5366	0.9131	35			1232		1.11196	150	2.76078	834.794	657	719
Sample306	57.96	26.77	Europe	Estonia	forest: temperate coniferous forest biome	Continental	5.16667	7.78333	33.2814	0.8857	18	59.4	5.4	1097		0.505119	143	2.86536	841.585	642	724
Sample307	58.3	26.67	Europe	Estonia	forest: temperate coniferous forest biome	Continental	5.2875	7.99167	33.9964	0.8588	32	53.4	5.9	1268	33.8932	0.599474	77	2.76078	842.475	626	728
Sample308	58.04	26.39	Europe	Estonia	forest: temperate coniferous forest biome	Continental	5.02083	7.85833	31.5177	0.9269	22	50.3	5.5	1143	30.5117	0.139845	157	2.76078	826.021	661	713
Sample309	57.98	26.81	Europe	Estonia	forest: temperate coniferous forest biome	Continental	5.1875	7.825	32.9813	0.883	14	58.9	5.3	1346		0.709481	139	2.86536	844.676	643	728
Sample310	58.54	26.86	Europe	Estonia	forest: temperate coniferous forest biome	Continental	5.15833	7.93333	35.4049	0.8389	11	54	5.8	1194		0.313232	63	2.70327	846.892	607	723
Sample311	58.59	27.14	Europe	Estonia	forest: temperate coniferous forest biome	Continental	5.1625	8.025	35.6125	0.8294	26	54.1	6.2	1166		0.289838	39	2.70327	862.626	603	727
Sample312	58.16	27.04	Europe	Estonia:Akste	forest: temperate coniferous forest biome	Continental	5.3375	7.90833	34.8912	0.8395	14	53.3	5.5	1105	30.4692	0.219763	73	2.76078	854.34	618	736
Sample313	58.58	27	Europe	Estonia	forest: temperate coniferous forest biome	Continental	4.95417	7.875	35.4787	0.8559	26	54.2	5.3	1535	32.5983	0.376177	104	2.70327	849.712	612	715
Sample314	58.67	26.21	Europe	Estonia	forest: temperate coniferous forest biome	Continental	5.2875	8.025	33.5398	0.8967	14	51	5.6	1807		0.169704	80	2.7085	835.815	652	727
Sample315	58.69	25.89	Europe	Estonia	forest: temperate coniferous forest biome	Continental	5.3875	8.25833	32.8079	0.8856	18	45.6	6.1	735	34.2808	0.0804368	67	2.71372	843.475	654	738
Sample316	58.07	26.75	Europe	Estonia	forest: temperate coniferous forest biome	Continental	5.11667	7.85	33.9491	0.8831	26	55.9	5.6	1167	32.2902	0.337136	140	2.76078	842.468	640	724
Sample317	57.96	26.07	Europe	Estonia	forest: temperate coniferous forest biome	Continental	5.44167	8.08333	30.5396	0.9087	13	54.2	5.1	1427	33.7975	1.10198	69	2.87059	833.729	661	727
Sample318	58.54	26.88	Europe	Estonia	forest: temperate coniferous forest biome	Continental	5.11667	7.93333	35.2299	0.8429	19	55	5.6	1360	37.1942	0.279201	72	2.70327	845.242	609	722
Sample319	58.25	26.45	Europe	Estonia	forest: temperate coniferous forest biome	Continental	5.4125	8.09167	32.346	0.8678	37	56.1	5.6	1194	32.0067	0.186718	65	2.76078	841.738	636	732
Sample320	58.41	26.56	Europe	Estonia	forest: temperate coniferous forest biome	Continental	5.40833	8.01667	34.7776	0.8419	18	51.7	5.6	1073	36.3078	0.713312	46	2.76078	845.127	618	734
Sample321	58.04	26.4	Europe	Estonia	forest: temperate coniferous forest biome	Continental	5.0375	7.875	31.7801	0.9233	14	50.2	5.5	1324	31.1431	0.420937	163	2.76078	828.899	660	714
Sample322	58.72	26.26	Europe	Estonia	forest: temperate coniferous forest biome	Continental	5.24167	8.13333	33.5716	0.8876	14	44.2	5.9	1438	32.9499	0.115345	81	2.7085	844.42	647	728
Sample323	58.44	26.57	Europe	Estonia	forest: temperate coniferous forest biome	Continental	5.38333	8.03333	34.4193	0.8454	22	48.4	6.2	944	36.7014	0.337506	53	2.76078	843.182	620	733
Sample324	58.28	27.32	Europe	Estonia	forest: temperate coniferous forest biome	Continental	5.3875	7.675	34.9563	0.8272	10	50.6	5.5	1267	32.0489	0.56169	49	2.76078	857.579	611	738
Sample325	58.41	26.63	Europe	Estonia	forest: temperate coniferous forest biome	Continental	5.35417	8.05833	35.0045	0.8437	21	50.5	6.2	1289		0.498788	58	2.76078	846.464	618	732
Sample326	58.43	26.54	Europe	Estonia	forest: temperate coniferous forest biome	Continental	5.45417	8.04167	34.2958	0.8465	24	52.5	5.9	1067	32.5202	0.24046	45	2.76078	841.215	623	735
Sample327	58.12	26.49	Europe	Estonia	forest: temperate coniferous forest biome	Continental	5.19583	7.94167	32.3021	0.8955	22	50.8	5.7	1068		0.236136	126	2.76078	834.153	648	723
Sample328	58.12	26.41	Europe	Estonia	forest: temperate coniferous forest biome	Continental	5.28333	8	32.7074	0.8899	14	55.8	5.4	981		0.979811	98	2.76078	831.907	644	723
Sample329	58.54	26.92	Europe	Estonia	forest: temperate coniferous forest biome	Continental	5.1625	7.925	35.4338	0.8415	18	53.7	5.4	1713	34.1223	0.062647	63	2.70327	846.646	607	721
Sample330	58.44	26.73	Europe	Estonia	forest: temperate coniferous forest biome	Continental	5.32917	8.14167	35.0166	0.8382	35	52.5	5.8	1227	33.06	0.103085	57	2.76078	851.022	615	733
Sample331	57.78	26.8	Europe	Estonia	forest: temperate coniferous forest biome	Continental	5.54167	7.85	31.9896	0.8675	14	47.8	5.4	1360	33.7633	0.182202	80	2.86536	840.202	645	743
Sample332	58.09	26.53	Europe	Estonia	forest: temperate coniferous forest biome	Continental	5.12083	7.89167	32.7548	0.9	26	55.2	5.5	1149	36.0496	0.933564	142	2.76078	834.044	648	719
Sample344	58.53	26.72	Europe	Estonia	forest: temperate coniferous forest biome	Continental	5.14167	8	34.3386	0.8501	22	50.1	6.2	1070	29.6169	0.676024	80	2.70327	855.03	618	726
Sample345	58.35	26.89	Europe	Estonia	forest: temperate coniferous forest biome	Continental	5.3375	8.075	35.597	0.8256	18	53.9	6.5	1236	28.3081	0.808852	44	2.76078	855.608	605	732
Sample346	58.18	27.36	Europe	Estonia	forest: temperate coniferous forest biome	Continental	5.36667	7.85	34.9084	0.8302	26	49.6	5.4	1056		0.124308	62	2.76078	865.078	617	743
Sample347	58.11	26.98	Europe	Estonia	forest: temperate coniferous forest biome	Continental	5.375	7.8	34.2564	0.8466	18	54.4	5.7	1096	28.6958	0.201345	82	2.76078	850.758	624	737
Sample348	58.59	26.87	Europe	Estonia	forest: temperate coniferous forest biome	Continental	5.1125	7.925	35.8982	0.8529	17	55.4	5.6	1393		0.529822	69	2.70327	845.101	614	719
Sample349	58.23	26.7	Europe	Estonia	forest: temperate coniferous forest biome	Continental	5.22083	7.95833	33.6656	0.8603	26	55.8	6	956	31.7991	0.230837	92	2.76078	843.681	624	725
Sample350	58.19	26.41	Europe	Estonia	forest: temperate coniferous forest biome	Continental	5.38333	8.08333	32.6934	0.8763	35	51.4	5.6	1091	29.7217	0.358981	71	2.76078	835.386	638	727
Sample351	58.33	26.89	Europe	Estonia	forest: temperate coniferous forest biome	Continental	5.32083	8.05833	35.7315	0.8291	18	54.8	5.8	1128	34.6325	0.827992	56	2.76078	856.017	607	732
Sample352	58.05	26.77	Europe	Estonia	forest: temperate coniferous forest biome	Continental	5.1375	7.825	33.3228	0.885	19	57.7	5.7	1278	31.9765	0.439164	140	2.76078	842.826	641	724
Sample353	58.23	26.68	Europe	Estonia	forest: temperate coniferous forest biome	Continental	5.20417	7.925	33.9912	0.8571	26	50.4	5.6	1073	30.9292	0.409488	93	2.76078	841.826	622	725
Sample354	57.99	26.38	Europe	Estonia	forest: temperate coniferous forest biome	Continental	4.975	7.83333	31.2119	0.9399	26	47.9	5.5	974	30.7844	1.19131	160	2.87059	825.251	667	709
Sample355	58.14	26.95	Europe	Estonia	forest: temperate coniferous forest biome	Continental	5.32917	7.94167	34.4563	0.8481	26	55	6.1	799	28.9942	0.248372	77	2.76078	854.511	623	734
Sample356	57.88	26.58	Europe	Estonia	forest: temperate coniferous forest biome	Continental	5.22917	8.05833	32.1941	0.894	26	46.4	5.6	1228		0.695584	117	2.86536	838.78	651	728
Sample357	58.09	27.38	Europe	Estonia	forest: temperate coniferous forest biome	Continental	5.42917	7.74167	34.7112	0.8248	22	50.1	5.5	1096		0.438199	51	2.76078	862.281	618	749
Sample358	57.84	26.8	Europe	Estonia	forest: temperate coniferous forest biome	Continental	5.50833	7.88333	32.4243	0.8676	34	54.2	5.6	1112	32.4285	0.260477	82	2.86536	837.935	642	739
Sample359	58.4	26.64	Europe	Estonia	forest: temperate coniferous forest biome	Continental	5.36667	8.1	35.0139	0.8446	31	51.5	6.3	1081	31.0919	0.25691	55	2.76078	848.767	618	731
Sample360	58.51	26.48	Europe	Estonia	forest: temperate coniferous forest biome	Continental	5.32083	8.025	34.0624	0.8662	14	48.5	5.7	1681	32.7647	0.114688	68	2.7085	834.077	630	727
Sample361	58.04	26.4	Europe	Estonia	forest: temperate coniferous forest biome	Continental	5.0375	7.875	31.7801	0.9233	14	50.2	5.5	1324	31.1431	0.420937	163	2.76078	828.899	660	714
Sample362	58.74	26.32	Europe	Estonia	forest: temperate coniferous forest biome	Continental	5.18333	8.11667	34.1613	0.891	21	67.6	6.3	1432	31.2054	0.283109	86	2.7085	845.424	646	725
Sample363	58.42	26.56	Europe	Estonia	forest: temperate coniferous forest biome	Continental	5.4	8.03333	34.1531	0.8457	26	52.6	5.6	1114	35.0899	0.221369	51	2.76078	844.051	621	734
Sample364	58.61	27.13	Europe	Estonia	forest: temperate coniferous forest biome	Continental	5.04167	8.01667	36.3619	0.8291	26	57.6	5.9	991		0.591227	52	2.70327	861.526	602	726
Sample365	58.28	27.32	Europe	Estonia	forest: temperate coniferous forest biome	Continental	5.3875	7.675	34.9563	0.8272	10	50.6	5.5	1267	32.0489	0.56169	49	2.76078	857.579	611	738
Sample366	58.41	26.64	Europe	Estonia	forest: temperate coniferous forest biome	Continental	5.32917	8.075	34.7017	0.8452	31	50.9	6.2	1409	32.7079	0.554027	62	2.76078	847.042	618	731
Sample367	58.09	26.45	Europe	Estonia	forest: temperate coniferous forest biome	Continental	5.19583	7.925	32.6818	0.9033	14	50.5	5.3	1012	30.1646	0.231871	111	2.76078	832.961	650	719
Sample368	58.46	26.82	Europe	Estonia	forest: temperate coniferous forest biome	Continental	5.2375	8.125	35.1704	0.8403	26	49.7	6	1510	29.59	0.300484	52	2.76078	853.994	610	725
Sample369	58.75	26.32	Europe	Estonia	forest: temperate coniferous forest biome	Continental	5.175	8.11667	34.1149	0.8926	21	54.5	5.9	1551	31.0842	0.731393	85	2.7085	843.668	647	724
Sample370	58.55	26.93	Europe	Estonia	forest: temperate coniferous forest biome	Continental	5.12917	7.875	35.7105	0.8501	18	55.3	5.5	1666	34.1909	0.758455	70	2.70327	846.459	611	718
Sample371	58.17	26.42	Europe	Estonia	forest: temperate coniferous forest biome	Continental	5.375	8.06667	32.5286	0.8731	14	49.7	5.4	1248	31.3483	0.978064	75	2.76078	834.891	636	728
Sample372	58.09	26.53	Europe	Estonia	forest: temperate coniferous forest biome	Continental	5.12083	7.89167	32.7548	0.9	26	55.2	5.5	1149	36.0496	0.933564	142	2.76078	834.044	648	719
Sample373	58.28	27.32	Europe	Estonia	forest: temperate coniferous forest biome	Continental	5.3875	7.675	34.9563	0.8272	10	50.6	5.5	1267	32.0489	0.56169	49	2.76078	857.579	611	738
Sample374	58.46	26.82	Europe	Estonia:L?li	forest: temperate coniferous forest biome	Continental	5.2375	8.125	35.1704	0.8403	26	49.7	6	1510	29.59	0.300484	52	2.76078	853.994	610	725
Sample375	58.46	26.82	Europe	Estonia:L?li	forest: temperate coniferous forest biome	Continental	5.2375	8.125	35.1704	0.8403	26	49.7	6	1510	29.59	0.300484	52	2.76078	853.994	610	725
Sample376	58.19	26.57	Europe	Estonia:Pangodi	forest: temperate coniferous forest biome	Continental	5.1125	7.90833	33.0599	0.8918	26	45.3	5.7	1143	32.3617	0.352126	115	2.76078	838.492	642	719
Sample377	58.12	27.03	Europe	Estonia:Maarjak?a	forest: temperate coniferous forest biome	Continental	5.38333	7.83333	34.3413	0.8453	22	52	5.7	1275	28.8699	0.558604	76	2.76078	852.313	624	738
Sample378	58.28	27.32	Europe	Estonia:J?vselja	forest: temperate broadleaf forest biome	Continental	5.3875	7.675	34.9563	0.8272	10	50.6	5.5	1267	32.0489	0.56169	49	2.76078	857.579	611	738
Sample379	58.28	27.32	Europe	Estonia:J?vselja	forest: temperate broadleaf forest biome	Continental	5.3875	7.675	34.9563	0.8272	10	50.6	5.5	1267	32.0489	0.56169	49	2.76078	857.579	611	738
Sample380	58.28	27.32	Europe	Estonia:J?vselja	forest: temperate broadleaf forest biome	Continental	5.3875	7.675	34.9563	0.8272	10	50.6	5.5	1267	32.0489	0.56169	49	2.76078	857.579	611	738
Sample381	58.27	27.32	Europe	Estonia:J?vselja	forest: temperate broadleaf forest biome	Continental	5.375	7.7	35.0305	0.8282	18	52.5	5.4	1160	32.199	0.772914	55	2.76078	857.58	612	738
Sample382	58.28	27.32	Europe	Estonia:J?vselja	forest: temperate broadleaf forest biome	Continental	5.3875	7.675	34.9563	0.8272	10	50.6	5.5	1267	32.0489	0.56169	49	2.76078	857.579	611	738
Sample383	58.27	27.33	Europe	Estonia:J?vselja	forest: temperate broadleaf forest biome	Continental	5.35417	7.65833	35.2089	0.826	18	51.5	5.4	1081	31.7521	0.159981	60	2.76078	857.67	610	738
Sample384	58.37	25.59	Europe	Estonia:Haage	forest: temperate coniferous forest biome	Continental	5.39167	8.08333	31.2191	0.88	52					0.0552728	90	2.7817	858.696	649	737
Sample385	58.28	27.32	Europe	Estonia:J?vselja	forest: temperate broadleaf forest biome	Continental	5.3875	7.675	34.9563	0.8272	10	50.6	5.5	1267	32.0489	0.56169	49	2.76078	857.579	611	738
Sample386	58.28	27.32	Europe	Estonia:J?vselja	forest: temperate broadleaf forest biome	Continental	5.3875	7.675	34.9563	0.8272	10	50.6	5.5	1267	32.0489	0.56169	49	2.76078	857.579	611	738
Sample387	58.28	27.32	Europe	Estonia:J?vselja	forest: temperate broadleaf forest biome	Continental	5.3875	7.675	34.9563	0.8272	10	50.6	5.5	1267	32.0489	0.56169	49	2.76078	857.579	611	738
Sample388	58.28	27.32	Europe	Estonia:J?vselja	forest: temperate broadleaf forest biome	Continental	5.3875	7.675	34.9563	0.8272	10	50.6	5.5	1267	32.0489	0.56169	49	2.76078	857.579	611	738
Sample389	58.28	27.32	Europe	Estonia:J?vselja	forest: temperate broadleaf forest biome	Continental	5.3875	7.675	34.9563	0.8272	10	50.6	5.5	1267	32.0489	0.56169	49	2.76078	857.579	611	738
Sample390	58.28	27.33	Europe	Estonia:J?vselja	forest: temperate broadleaf forest biome	Continental	5.37917	7.65833	34.8574	0.8284	10	51.5	5.5	1340	32.9903	0.553434	53	2.76078	857.887	612	738
Sample391	58.27	27.33	Europe	Estonia:J?vselja	forest: temperate coniferous forest biome	Continental	5.35417	7.65833	35.2089	0.826	18	51.5	5.4	1081	31.7521	0.159981	60	2.76078	857.67	610	738
Sample392	58.28	27.34	Europe	Estonia:J?vselja	forest: temperate broadleaf forest biome	Continental	5.37917	7.64167	34.7027	0.8291	18	53.1	5.4	1152	33.67	0.581328	48	2.76078	857.975	612	738
Sample393	58.28	27.33	Europe	Estonia:J?vselja	forest: temperate broadleaf forest biome	Continental	5.37917	7.65833	34.8574	0.8284	10	51.5	5.5	1340	32.9903	0.553434	53	2.76078	857.887	612	738
Sample394	58.27	27.33	Europe	Estonia:J?vselja	forest: temperate coniferous forest biome	Continental	5.35417	7.65833	35.2089	0.826	18	51.5	5.4	1081	31.7521	0.159981	60	2.76078	857.67	610	738
Sample395	58.27	27.32	Europe	Estonia:J?vselja	forest: temperate coniferous forest biome	Continental	5.375	7.7	35.0305	0.8282	18	52.5	5.4	1160	32.199	0.772914	55	2.76078	857.58	612	738
Sample396	58.26	27.32	Europe	Estonia:J?vselja	forest: temperate coniferous forest biome	Continental	5.35	7.73333	35.0689	0.8295	18	51.8	5.5	1153		0.745796	55	2.76078	859.133	612	737
Sample397	58.26	27.31	Europe	Estonia:J?vselja	forest: temperate broadleaf forest biome	Continental	5.34583	7.74167	35.0305	0.8299	10	51.9	5.4	1191	33.8534	0.280721	57	2.76078	858.61	612	737
Sample398	58.26	27.31	Europe	Estonia:J?vselja	forest: temperate broadleaf forest biome	Continental	5.34583	7.74167	35.0305	0.8299	10	51.9	5.4	1191	33.8534	0.280721	57	2.76078	858.61	612	737
Sample399	58.26	27.31	Europe	Estonia:J?vselja	forest: temperate broadleaf forest biome	Continental	5.34583	7.74167	35.0305	0.8299	10	51.9	5.4	1191	33.8534	0.280721	57	2.76078	858.61	612	737
Sample400	58.28	27.3	Europe	Estonia:J?vselja	forest: temperate coniferous forest biome	Continental	5.38333	7.68333	34.9202	0.8226	18	52.7	5.7	1088		0.124576	49	2.76078	857.275	609	740
Sample401	58.28	27.31	Europe	Estonia:J?vselja	forest: temperate coniferous forest biome	Continental	5.39167	7.66667	35.0305	0.8279	18	51.1	5.6	1312	32.2017	0.0289841	45	2.76078	857.3	612	739
Sample402	58.28	27.31	Europe	Estonia:J?vselja	forest: temperate broadleaf forest biome	Continental	5.39167	7.66667	35.0305	0.8279	18	51.1	5.6	1312	32.2017	0.0289841	45	2.76078	857.3	612	739
Sample403	58.28	27.31	Europe	Estonia:J?vselja	forest: temperate broadleaf forest biome	Continental	5.39167	7.66667	35.0305	0.8279	18	51.1	5.6	1312	32.2017	0.0289841	45	2.76078	857.3	612	739
Sample404	58.27	27.31	Europe	Estonia:J?vselja	forest: temperate broadleaf forest biome	Continental	5.3875	7.69167	35.12	0.8268	10	51.7	5.5	1211	33.6821	0.558	47	2.76078	857.253	611	738
Sample405	58.29	27.33	Europe	Estonia:J?vselja	forest: temperate broadleaf forest biome	Continental	5.39583	7.65833	34.9344	0.8283	10	51.8	5.3	1503	39.0148	0.323556	41	2.76078	857.927	612	738
Sample406	58.29	27.33	Europe	Estonia:J?vselja	forest: temperate broadleaf forest biome	Continental	5.39583	7.65833	34.9344	0.8283	10	51.8	5.3	1503	39.0148	0.323556	41	2.76078	857.927	612	738
Sample407	58.29	27.31	Europe	Estonia:J?vselja	forest: temperate broadleaf forest biome	Continental	5.39583	7.675	35.3453	0.8242	18	51.5	5.5	1312	32.7392	0.0289841	48	2.76078	857.278	609	738
Sample408	58.27	27.31	Europe	Estonia:J?vselja	forest: temperate coniferous forest biome	Continental	5.3875	7.69167	35.12	0.8268	10	51.7	5.5	1211	33.6821	0.558	47	2.76078	857.253	611	738
Sample409	58.27	27.32	Europe	Estonia:J?vselja	forest: temperate broadleaf forest biome	Continental	5.375	7.7	35.0305	0.8282	18	52.5	5.4	1160	32.199	0.772914	55	2.76078	857.58	612	738
Sample410	58.27	27.32	Europe	Estonia:J?vselja	forest: temperate coniferous forest biome	Continental	5.375	7.7	35.0305	0.8282	18	52.5	5.4	1160	32.199	0.772914	55	2.76078	857.58	612	738
Sample411	58.29	27.36	Europe	Estonia:J?vselja	forest: temperate broadleaf forest biome	Continental	5.4	7.6	34.8748	0.8164	22	52.1	5.4	1230	37.1646	0.333732	45	2.76078	860.085	605	741
Sample412	58.28	27.34	Europe	Estonia:J?vselja	forest: temperate broadleaf forest biome	Continental	5.37917	7.64167	34.7027	0.8291	18	53.1	5.4	1152	33.67	0.581328	48	2.76078	857.975	612	738
Sample413	58.28	27.33	Europe	Estonia:J?vselja	forest: temperate broadleaf forest biome	Continental	5.37917	7.65833	34.8574	0.8284	10	51.5	5.5	1340	32.9903	0.553434	53	2.76078	857.887	612	738
Sample414	58.28	27.33	Europe	Estonia:J?vselja	forest: temperate broadleaf forest biome	Continental	5.37917	7.65833	34.8574	0.8284	10	51.5	5.5	1340	32.9903	0.553434	53	2.76078	857.887	612	738
Sample415	58.26	27.3	Europe	Estonia:J?vselja	forest: temperate coniferous forest biome	Continental	5.37917	7.725	35.12	0.8264	10	51.6	5.5	1194	34.6213	0.350293	51	2.76078	857.559	611	739
Sample416	58.28	26.37	Europe	Estonia:P?guauk	forest: temperate broadleaf forest biome	Continental	5.30417	8.10833	32.3132	0.8755	22	51.1	5.5	832	36.0542	0.857033	82	2.76078	839.971	640	730
Sample417	58.28	26.37	Europe	Estonia:P?guauk	forest: temperate broadleaf forest biome	Continental	5.30417	8.10833	32.3132	0.8755	22	51.1	5.5	832	36.0542	0.857033	82	2.76078	839.971	640	730
Sample418	58.05	24.71	Europe	Estonia:N-Nigula	forest: temperate coniferous forest biome	Continental	5.05417	6.925	32.5792	1.0121	12	44	5.1	1803	34.3186	0.619705	62	2.75555	841.437	685	676
Sample419	58.34	26.56	Europe	Estonia:N?iaru	forest: temperate broadleaf forest biome	Continental	5.3375	8.10833	34.428	0.851	26	51.3	6.1	1176	32.1935	0.412005	67	2.76078	847.387	623	732
Sample420	58.34	26.56	Europe	Estonia:N?iaru	forest: temperate broadleaf forest biome	Continental	5.3375	8.10833	34.428	0.851	26	51.3	6.1	1176	32.1935	0.412005	67	2.76078	847.387	623	732
Sample467	58.33	21.9	Europe	Estonia:Tagam?sa	woodland: woodland: temperate woodland biome	Continental	6.83333	4.76667	32.0307	0.7728	12	62.1	5.8	1287	28.3058	0.237315	9	2.70327	732.264	580	750
Sample475	58.39	22.66	Europe	Estonia:Liiva-Putla	forest: temperate coniferous forest biome	Continental	6.47083	6.09167	31.827	0.8219	23	63.7	6	1129	28.2492	0.0553007	33	2.7085	745.579	619	753
Sample476	58.39	22.66	Europe	Estonia:Liiva-Putla	forest: temperate coniferous forest biome	Continental	6.47083	6.09167	31.827	0.8219	23	63.7	6	1129	28.2492	0.0553007	33	2.7085	745.579	619	753
Sample479	58.02	22.17	Europe	Estonia:Viieristi	forest: temperate coniferous forest biome	Continental	7.125	5.06667	32.8833	0.7099	20	56.5	5.4	1598	28.9439	0.662534	27	2.7085	740.698	568	800
Sample483	58.31	22.08	Europe	Estonia:M?be	woodland: woodland: temperate woodland biome	Continental	6.70833	5.26667	32.4675	0.7837	12	56	5.2	1398	29.2643	0.685544	44	2.7085	733.664	600	765
Sample484	58.31	22.08	Europe	Estonia:M?be	woodland: woodland: temperate woodland biome	Continental	6.70833	5.26667	32.4675	0.7837	12	56	5.2	1398	29.2643	0.685544	44	2.7085	733.664	600	765
Sample485	58.3	22.1	Europe	Estonia:Upa	forest: temperate broadleaf forest biome	Continental	6.65417	5.25833	31.8658	0.7877	16	57.3	5.2	1486	30.6441	0.256779	52	2.7085	732.444	605	767
Sample486	58.49	22.83	Europe	Estonia:Ratla	forest: temperate broadleaf forest biome	Continental	6.4125	6.25833	32.7117	0.8094	27	64.9	6.1	1070	34.7194	0.285378	22	2.7085	759.632	609	752
Sample487	58.61	22.8	Europe	Estonia:Hindu	forest: temperate coniferous forest biome	Continental	6.55	5.63333	34.0197	0.7978	12	69.1	6	1212	27.2311	0.0556377	15	2.65621	748.013	598	749
Sample488	58.23	22.44	Europe	Estonia:Loode	woodland: woodland: temperate woodland biome	Continental	6.79583	5.69167	31.043	0.7901	32	64.7	5.7	1310	29.8553	0.341556	7	2.7085	739.018	603	763
Sample489	58.56	23.55	Europe	Estonia:Puhtu	forest: temperate broadleaf forest biome	Continental	6.6125	6.19167	32.0313	0.7577	20	55.8	5.6	1206		0.0555671	10	2.65621	815.339	589	777
Sample490	58.56	23.55	Europe	Estonia:Puhtu	forest: temperate broadleaf forest biome	Continental	6.6125	6.19167	32.0313	0.7577	20	55.8	5.6	1206		0.0555671	10	2.65621	815.339	589	777
Sample491	58.58	23.57	Europe	Estonia:Laelatu	woodland: woodland: temperate woodland biome	Continental										0.173904	1	2.65621
Sample492	58.58	23.57	Europe	Estonia:Laelatu	woodland: woodland: temperate woodland biome	Continental										0.173904	1	2.65621
Sample493	58.58	23.57	Europe	Estonia:Laelatu	woodland: woodland: temperate woodland biome	Continental										0.173904	1	2.65621
Sample494	58.62	24.1	Europe	Estonia:Mihkli	forest: temperate broadleaf forest biome	Continental	6.00417	7.14167	32.772	0.8578	14	55.8	6.4	676	31.3765	0.792633	35	2.66667	810.907	647	754
Sample495	58.24	26.58	Europe	Estonia:Luke	anthropogenic: village biome	Continental	5.30417	7.975	33.4053	0.8552	22	51.8	6.2	975	35.4365	1.10264	81	2.76078	841.655	625	730
Sample496	66.71	20.1	Europe	Sweden:Jokkmokk	forest: subpolar coniferous forest biome	Polar/Montane	-0.641667	9.73333	38.2266	1.0981	8	56.3	4.7	2392		4.04819	336	2.08105	1022.46	578	526
Sample497	68.23	21.95	Europe	Sweden:Idivuoma	forest: subpolar coniferous forest biome	Polar/Montane	-2.1625	9.54167	42.5181	1.0045	9	50.1	4.7	1825		1.41511	394	2.03399	1017.17	478	475
Sample498	68.6	21.75	Europe	Finland:Kelottij?vi	forest: subpolar coniferous forest biome	Polar/Montane	-2.2	9.31667	38.9417	0.9741	12	54.5	4.7	1776		3.2758	409	2.00784	1000.35	464	476
Sample499	69.89	21.57	Europe	Norway:Kvaenangsfjellet	tundra biome	Polar/Montane	0.025	5.26667	23.2834	1.2133	16	49.1	5.7	1618		9.92391	504	1.75686	686.932	575	473
Sample500	69.9	21.58	Europe	Norway:Kvaenangsfjellet	tundra biome	Polar/Montane	1.4625	4.95833	25.5518	1.1093	13	48.4	5.6	1868		12.746	341	1.75686	662.647	519	497
Sample501	70.15	24.79	Europe	Norway:Stabbursdalen	forest: subpolar coniferous forest biome	Polar/Montane	0.466667	7	22.8478	0.8821	9	65.5	5	2311		0.342675	77	1.53725	801.233	491	558
Sample502	70.15	24.79	Europe	Norway:Stabbursdalen	forest: subpolar coniferous forest biome	Polar/Montane	0.466667	7	22.8478	0.8821	9	65.5	5	2311		0.342675	77	1.53725	801.233	491	558
Sample503	68.06	24.03	Europe	Finland:Pallastunturi	tundra biome	Polar/Montane	-3	8.76667	41.079	1.3543	9	52.7	5.1	1905			0	1.92418	967.57	592	437
Sample504	58.08	26.34	Europe	Estonia:V?km?	forest: temperate coniferous forest biome	Continental	5.04167	7.93333	31.4769	0.929	14	46.4	5.3	952	33.9767	1.07851	162	2.76078	825.901	664	714
Sample505	58.89	23.68	Europe	Estonia:Uneste	forest: temperate broadleaf forest biome	Continental	6.14167	7.38333	35.7369	0.8284	26	66.5	6.2	1240	33.5091	0.0806755	15	2.65621	807.372	630	760
Sample506	58.93	23.86	Europe	Estonia:Turvalepa	forest: temperate broadleaf forest biome	Continental	5.95417	7.89167	36.2155	0.8616	25	47.8	6.2	958	36.1758	0.409899	27	2.65621	811.308	656	761
Sample507	58.44	26.71	Europe	Estonia:Vasula	forest: temperate broadleaf forest biome	Continental	5.35417	8.10833	35.0409	0.8404	30	51.4	5.9	1393	33.4692	0.300361	54	2.76078	850.664	617	734
Sample511	59.42	24.67	Europe	Estonia:Veskimetsa	forest: temperate broadleaf forest biome	Continental	5.95417	6.70833	30.8025	0.8759	52	50.8	5.4	1316		0.556229	12	2.60392	796.859	663	756
Sample519	58.28	22.82	Europe	Estonia:N?suma	forest: temperate broadleaf forest biome	Continental	6.51667	6.25	30.9361	0.7956	19	55.2	6	1201	33.3908	0.237057	6	2.7085	752.095	591	742
Sample520	58.21	22.31	Europe	Estonia:M?djala	forest: temperate coniferous forest biome	Continental	6.86667	5.45	31.4857	0.7727	21		5.7		29.227	0.308695	6	2.7085	735.726	594	768
Sample521	59.49	25.36	Europe	Estonia:Valkla	forest: temperate broadleaf forest biome	Continental	5.33333	7.38333	31.107	0.9134					28.9461	0.870931	29	2.60392	809.967	660	722
Sample522	58.36	22.48	Europe	Estonia:Kirikuk?a	forest: temperate broadleaf forest biome	Continental	6.5625	6.10833	31.5578	0.8159	18	55.4	6.2	836	33.8877	0.140623	28	2.7085	744.55	621	761
Sample523	58.3	21.94	Europe	Estonia:Atla	shrubland: temperate shrubland biome	Continental	6.8625	4.99167	32.2529	0.7626	13	57.1	5.9	1378	29.6439	0.318822	11	2.70327	735.197	584	765
Sample524	58.28	22.46	Europe	Estonia:Unem?	grassland: flooded grassland biome	Continental	6.78333	5.98333	31.3009	0.8002	36	57.9	6.1	1124	31.6248	0.175265	8	2.7085	740.327	615	768
Sample525	58.15	25.04	Europe	Estonia:Tihemetsa park	anthropogenic: village biome	Continental	4.77083	7.19167	32.7402	1.0354	13	51.7	6	1189	35.53	0.17468	71	2.80261	865.386	695	671
Sample526	58.4	26.74	Europe	Estonia:Eesti Rahvamuuseum	anthropogenic: village biome	Continental	5.52917	8.175	34.6341	0.8195	42	50.8	6.4	958		0.443456	61	2.76078	856.559	615	750
Sample527	58.44	26.9	Europe	Estonia:V?gvere	forest: temperate broadleaf forest biome	Continental	5.17917	8.15833	34.7192	0.8418	22	51.3	6	1213	34.4244	0.202568	59	2.76078	859.769	613	728
Sample528	58.32	26.72	Europe	Estonia:?enurme m?sapark	anthropogenic: village biome	Continental	5.35833	8.11667	34.8868	0.8421	47	55.4	6.4	1190	26.4721	0.667927	59	2.76078	848.769	616	731
Sample529	58.35	25.55	Europe	Estonia:Pinska	forest: temperate broadleaf forest biome	Continental	5.32083	7.99167	31.4169	0.8978	39	45.4	6.4	1233	33.9261	0.891198	77	2.7817	855.956	651	725
Sample530	58.35	25.55	Europe	Estonia:Pinska	forest: temperate broadleaf forest biome	Continental	5.32083	7.99167	31.4169	0.8978	39	45.4	6.4	1233	33.9261	0.891198	77	2.7817	855.956	651	725
Sample531	58.35	25.55	Europe	Estonia:Pinska	forest: temperate broadleaf forest biome	Continental	5.32083	7.99167	31.4169	0.8978	39	45.4	6.4	1233	33.9261	0.891198	77	2.7817	855.956	651	725
Sample532	58.47	22.82	Europe	Estonia:Ratla	woodland: woodland: temperate woodland biome	Continental	6.40833	6.26667	31.5887	0.8132	27	62.3	5.8	1047	33.3739	0.176094	25	2.7085	760.421	612	752
Sample533	58.3	22.58	Europe	Estonia:Tahula	forest: temperate broadleaf forest biome	Continental	6.64583	6.175	30.7824	0.8104	30	54.2	6.4	972	34.0716	0.350684	15	2.7085	747.056	616	760
Sample534	58.1	27.46	Europe	Estonia:R?ina	anthropogenic: urban biome	Continental	5.525	7.75	34.2345	0.8107	39					0.330423	39	2.76078	868.937	612	754
Sample536	36.78	12	Europe	Italy:Pantelleria:Montagne Grande summit	forest: temperate broadleaf forest biome	Temperate	15.4917	5.51667	60.9278	0.3915		31.4	6.2	866	39.0506	10.7903	558	6.39477	545.177	598	1527
Sample537	36.78	12	Europe	Italy:Pantelleria:Montagne Grande Northwest	forest: temperate coniferous forest biome	Temperate	15.4917	5.51667	60.9278	0.3915		31.4	6.2	866	39.0506	10.7903	558	6.39477	545.177	598	1527
Sample538	36.78	12.02	Europe	Italy:Pantelleria:Montagne Gibele South	forest: temperate broadleaf forest biome	Temperate	16.8875	5.39167	66.1285	0.345		32.7	6.6	864	35.7358	11.7757	373	6.39477	525.742	529	1533
Sample539	36.78	12.01	Europe	Italy:Pantelleria:Montagne Gibele crater	shrubland: temperate shrubland biome	Temperate	16.1625	5.44167	63.4021	0.3701		29.2	6.4	965	41.7893	7.59463	542	6.39477	535.308	567	1531
Sample540	36.78	12.01	Europe	Italy:Pantelleria:Monte Gibele North	forest: temperate coniferous forest biome	Temperate	16.1625	5.44167	63.4021	0.3701		29.2	6.4	965	41.7893	7.59463	542	6.39477	535.308	567	1531
Sample541	36.82	12.01	Europe	Italy:Pantelleria:Ponta Spadillo	forest: temperate broadleaf forest biome	Temperate	18.4042	5.325	70.7592	0.2879		42.4	6.8	802	19.5059	4.2884	65	6.39477	501.368	438	1521
Sample542	36.78	12.04	Europe	Italy:Pantelleria:Serra di Ghirlanda	shrubland: temperate shrubland biome	Temperate	17.8917	5.3	69.6173	0.3083		33.4	7.3	378	29.3822	3.81765	264	6.39477	512.839	476	1543
Sample543	36.77	12.02	Europe	Italy:Pantelleria:Byzantine tombs	forest: temperate broadleaf forest biome	Temperate	16.9875	5.45833	66.4004	0.3428		31.2	7.2	457	35.4616	2.3156	334	6.39477	525.665	525	1531
Sample544	36.74	12.02	Europe	Italy:Pantelleria:Balata dei Turci South	forest: temperate coniferous forest biome	Temperate	18.0583	5.45	70.0492	0.3		37.7	7.3	408	29.1476	14.1781	137	6.39477	507.054	460	1532
Sample545	36.74	12.03	Europe	Italy:Pantelleria:Balata del Turci Northeast	forest: temperate coniferous forest biome	Temperate	18.4083	5.5	71.306	0.2891		37.1	7.4	416	27.5638	9.6402	36	6.39477	502.398	443	1532
Sample546	36.76	12.02	Europe	Italy:Pantelleria:Casa Valerizo	forest: temperate broadleaf forest biome	Temperate	17.1083	5.53333	66.9835	0.336		32.3	6.9	714	32.061	3.75866	393	6.39477	525.413	515	1532
Sample547	36.81	12.01	Europe	Italy:Pantelleria:Cuddia de Mida	forest: temperate broadleaf forest biome	Temperate	18.1417	5.23333	70.0555	0.2964		41.4	6.9	795	29.7108	7.27201	154	6.39477	506.444	453	1528
Sample548	36.78	12.01	Europe	Italy:Pantelleria:Montagne Gisele Northwest	forest: temperate broadleaf forest biome	Temperate	16.1625	5.44167	63.4021	0.3701		29.2	6.4	965	41.7893	7.59463	542	6.39477	535.308	567	1531
Sample549	36.78	11.98	Europe	Italy:Pantelleria:Zighidi	shrubland: temperate shrubland biome	Temperate	17.4333	5.53333	67.199	0.3265		29.8	7.1	461	31.2795	13.8862	356	6.37909	520.966	503	1540
Sample550	46.9	8.45	Europe	Switzerland:Oberrickenbach	grassland: montane grassland biome	Polar/Montane	1.11667	6.05	10.3736	2.3148	14	30.5	5.2	1128		20.7159	1967	5.67843	548.785	1697	733
Sample551	59.44	24.79	Europe	Estonia:Kadriorg	anthropogenic: urban biome	Continental	5.88333	6.81667	30.6234	0.8925						1.68631	21	2.60392	791.49	669	749
Sample552	58.35	22.25	Europe	Estonia:Praakli	anthropogenic: cropland biome	Continental	6.62083	5.775	31.409	0.7984	17	56.3	5.7	1029	36.6529	0.187122	20	2.7085	738.923	611	765
Sample553	58.42	22.15	Europe	Estonia:Pidula	anthropogenic: village biome	Continental	6.60833	5.35	31.1328	0.8145	15	56.4	5.6	1022	31.762	0.674123	21	2.7085	724.117	607	745
Sample554	58.01	27.19	Europe	Estonia:Partsi	forest: temperate broadleaf forest biome	Continental	5.45833	7.86667	34.0479	0.8348	21	54.1	5.8	1232	28.1206	0.340524	69	2.76078	866.812	624	747
Sample555	58.35	23.99	Europe	Estonia:T?tamaa park	anthropogenic: village biome	Continental	6.12917	6.70833	31.6949	0.795	18	60.7	5.6	1258	29.6588	0.17554	28	2.7085	809.561	591	743
Sample556	58.34	24.29	Europe	Estonia:Lindi	forest: temperate broadleaf forest biome	Continental	6.1125	6.60833	31.9928	0.8768	18				34.6675	0.386515	3	2.7451	815.866	644	734
Sample557	58.38	24.32	Europe	Estonia:Valgerand	forest: temperate broadleaf forest biome	Continental										0.10304	2	2.7451
Sample563	59.4	24.29	Europe	Estonia:Keila-Joa	forest: temperate broadleaf forest biome	Continental	6.00417	6.05833	32.7782	0.8506	12	55.9	5.2	1642	30.3775	0.47222	30	2.60392	795.723	637	748
Sample564	59.43	27.52	Europe	Estonia:Toila	forest: temperate broadleaf forest biome	Continental										0.900238	1	2.60392
Sample565	59.43	27.51	Europe	Estonia:Toila	forest: temperate broadleaf forest biome	Continental										1.52994	3	2.60392
Sample566	59.44	27.19	Europe	Estonia:Saka	woodland: woodland: temperate woodland biome	Continental	4.84583	7.59167	38.6334	0.8469					28.5289	1.5643	31	2.60392	856.538	608	717
Sample567	58.28	27.32	Europe	Estonia:J?vselja q226	forest: temperate coniferous forest biome	Continental	5.3875	7.675	34.9563	0.8272	10	50.6	5.5	1267	32.0489	0.56169	49	2.76078	857.579	611	738
Sample568	58.41	26.6	Europe	Estonia:Kardla	forest: temperate broadleaf forest biome	Continental	5.35833	8.06667	34.6038	0.8407	26	47.9	5.8	1029	35.1019	0.336991	57	2.76078	845.987	617	733
Sample569	58.33	26.66	Europe	Estonia:Lemmatsi	forest: temperate broadleaf forest biome	Continental	5.31667	8.06667	34.5618	0.8503	47	50	6.2	960	36.9717	0.187048	64	2.76078	847.486	620	729
Sample570	58.04	26.46	Europe	Estonia:P?aj?ve s?atammed	anthropogenic: village biome	Continental	5.17917	7.89167	32.0458	0.9059	39					0.496254	124	2.76078	836.436	651	718
Sample571	58.04	26.57	Europe	Estonia:Pilkuse	forest: temperate broadleaf forest biome	Continental	4.85417	7.79167	32.0616	0.9283	21	52.9	5.2	1232		0.463669	188	2.76078	830.116	660	710
Sample572	58.05	26.54	Europe	Estonia:Pilkuse	forest: temperate broadleaf forest biome	Continental	4.975	7.86667	32.2332	0.9174	39	49	5.4	1148		1.5909	138	2.76078	832.708	655	713
Sample573	58.06	26.96	Europe	Estonia:Aarna	forest: temperate broadleaf forest biome	Continental	5.44167	7.86667	33.5879	0.8377	18	55.5	6.4	943	38.0008	0.71283	85	2.76078	851.156	623	743
Sample574	58.06	26.91	Europe	Estonia:Ihamaru Meemaja	anthropogenic: village biome	Continental	5.34167	7.83333	33.3692	0.8518	18	55.2	5.8	983		0.866029	109	2.76078	848.027	629	738
Sample575	57.92	26.58	Europe	Estonia:Urvaste Tamme-Lauri	woodland: woodland: temperate woodland biome	Continental	5.09583	7.89167	32.2149	0.9113	22	56.3	5.8	1044		0.260705	149	2.86536	835.087	655	718
Sample576	57.98	26.78	Europe	Estonia:Erastvere park	anthropogenic: village biome	Continental	5.18333	7.8	32.7299	0.8904	18	58.6		1026	35.2242	0.200811	132	2.86536	843.287	645	724
Sample577	58.06	27.06	Europe	Estonia:P?va	anthropogenic: urban biome	Continental	5.56667	8	33.7519	0.8288	50					1.64556	69	2.76078	862.126	623	751
Sample578	58.34	26.65	Europe	Estonia:R?i	forest: temperate broadleaf forest biome	Continental	5.30833	8.08333	34.4537	0.8468	39	49.1	6.4	1093	32.3998	0.403527	68	2.76078	848.396	618	729
Sample579	58.31	26.59	Europe	Estonia:N?iaru	forest: temperate broadleaf forest biome	Continental	5.30417	8.10833	34.1945	0.8565	34	57.5	6.5	947	27.9579	0.613105	71	2.76078	846.631	626	730
Sample580	58.31	26.59	Europe	Estonia:N?iaru	forest: temperate broadleaf forest biome	Continental	5.30417	8.10833	34.1945	0.8565	34	57.5	6.5	947	27.9579	0.613105	71	2.76078	846.631	626	730
Sample581	58.32	26.55	Europe	Estonia:N?iaru	forest: temperate broadleaf forest biome	Continental	5.325	8.11667	33.5537	0.8603	26	54.4	6.6	855	29.8944	0.187012	70	2.76078	845.078	628	729
Sample582	58.36	26.52	Europe	Estonia:R?u	forest: temperate broadleaf forest biome	Continental	5.45	8.1	33.7999	0.8459	18	49.8	6.4	1049	34.3071	0.2833	44	2.76078	844.808	623	736
Sample583	58.39	26.55	Europe	Estonia:Ilmatsalu farm	anthropogenic: village biome	Continental	5.425	8.1	33.828	0.8466	26	45	6.2	1091	30.105	0.0869522	43	2.76078	845.981	622	734
Sample584	58.36	26.67	Europe	Estonia:Eerika	grassland: temperate grassland biome	Continental	5.34167	8.11667	35.0639	0.8517	44	52	6.5	903	26.81	0.637942	72	2.76078	852.576	625	733
Sample585	58.53	26.64	Europe	Estonia:?si	anthropogenic: village biome	Continental	5.2625	8.125	33.9948	0.8523	26	47.5	6.3	1362	30.8433	0.283508	61	2.70327	853.035	619	726
Sample586	58.58	26.68	Europe	Estonia:Elistvere	anthropogenic: village biome	Continental	5.225	8.03333	34.4284	0.844	26	47.5	5.7	1514	27.9268	0.169285	59	2.70327	855.999	613	726
Sample587	58.58	26.72	Europe	Estonia:Lilu	forest: temperate broadleaf forest biome	Continental	5.16667	8.05	34.6437	0.8494	18	49.7	6.2	1155	36.2861	0.591796	61	2.70327	855.483	615	723
Sample588	58.53	26.73	Europe	Estonia:Saadj?ve	forest: temperate coniferous forest biome	Continental	5.19167	8.03333	34.4463	0.8489	26	51.8	6.3	1148		0.300857	68	2.70327	854.254	616	725
Sample589	57.18	24.84	Europe	Latvia:Sigulda	forest: temperate broadleaf forest biome	Continental	5.41667	6.85	31.8877	0.9609	29	51.3	5.6	1252	33.265	1.69871	90	2.90719	839.603	676	703
Sample590	57.15	24.85	Europe	Latvia:Sigulda station	anthropogenic: urban biome	Continental	5.375	6.88333	32.0961	0.9662	44					0.320564	101	2.90719	843.288	684	707
Sample591	56.92	23.98	Europe	Latvia:Riga airport	anthropogenic: urban biome	Continental	6.52083	6.99167	32.0432	0.8684	56					0.294662	11	2.95948	794.465	649	747
Sample592	57.24	22.64	Europe	Latvia:Skede	forest: temperate broadleaf forest biome	Continental	5.875	7	30.4171	0.9396	34	53.7	5.1	1199	35.0808	1.30154	134	2.84445	743.094	671	714
Sample593	57.29	22.72	Europe	Latvia:Sarcene	forest: temperate broadleaf forest biome	Continental	6.19167	7.18333	30.9625	0.8999	30	56.8	6.5	789	37.9259	0.289838	53	2.84445	742.991	648	720
Sample594	57.63	22.29	Europe	Latvia:Slitere	forest: temperate broadleaf forest biome	Continental	6.52917	6.025	32.5334	0.8333	30	49.3	5	1217	31.9058	1.08815	72	2.79216	734.623	618	741
Sample595	57.63	22.39	Europe	Latvia:Vidale	forest: temperate broadleaf forest biome	Continental	6.37083	6.20833	30.9874	0.8619	25	47	5	997	35.9314	1.54267	74	2.79216	726.465	626	726
Sample596	57.44	22.65	Europe	Latvia:Lube	forest: temperate broadleaf forest biome	Continental	6.225	6.91667	30.8014	0.9067	18	59.5	6.1	861	34.554	0.289838	45	2.84445	732.718	645	711
Sample597	58.59	23.57	Europe	Estonia:Laelatu	woodland: woodland: temperate woodland biome	Continental	6.5625	6.39167	31.9382	0.7646	28	59	5.7	1160	25.7089	0.562833	7	2.65621	815.944	592	774
Sample598	58.44	23.3	Europe	Estonia:K?assaare	forest: temperate broadleaf forest biome	Continental	6.70417	5.79167	32.2087	0.717	20			1435		0.343409	16	2.7085	788.083	556	775
Sample599	58.43	23.3	Europe	Estonia:K?assaare	forest: temperate broadleaf forest biome	Continental					16					0.467027	1	2.7085
Sample600	58.53	23.11	Europe	Estonia:Nenu	forest: temperate broadleaf forest biome	Continental	6.54583	6.15833	33.6785	0.7497	22	56.8	6.1	1050	34.2018	0.334404	4	2.65621	784.977	571	761
Sample601	58.33	22.14	Europe	Estonia:Kuuse	forest: temperate broadleaf forest biome	Continental	6.56667	5.25	31.797	0.8138	24	62.2	5.7	1258	28.708	0.403434	51	2.7085	727.94	613	753
Sample602	58.24	22.44	Europe	Estonia:Loode tammik	forest: temperate broadleaf forest biome	Continental	6.79583	5.69167	31.5466	0.7857	35	63.7	5.8	1407	29.9167	0.182017	5	2.7085	738.661	604	768
Sample603	58.01	22.05	Europe	Estonia:J?aja	forest: temperate broadleaf forest biome	Continental	7.27917	4.90833	33.626	0.6753	16	56.7	5.9	1029	32.5224	0.447761	13	2.7085	744.716	548	811
Sample604	58.03	22.09	Europe	Estonia:Kaunispe	forest: temperate broadleaf forest biome	Continental	7.1375	4.89167	32.8962	0.7032	22	51	5.7	1614	31.8636	0.633537	28	2.7085	740.071	560	796
Sample605	58.43	22.87	Europe	Estonia:Veeriku	forest: temperate broadleaf forest biome	Continental	6.4375	6.35833	32.1497	0.7981	26	63.7	6.1	1179	32.6032	0.114444	17	2.7085	763.31	601	753
Sample606	56.97	24.14	Europe	Latvia:Riga	anthropogenic: urban biome	Continental	6.65	7.05	31.4641	0.8584	64					0.438516	15	2.96471	808.576	659	767
Sample607	57.45	26.35	Europe	Latvia:Viresi	forest: temperate broadleaf forest biome	Continental	5.56667	8.11667	33.0159	0.8781	15	50.6	6.4	1123	28.9508	0.512978	87	2.93856	823.535	645	737
Sample608	57.61	26.35	Europe	Estonia:Tsirgum?	forest: temperate broadleaf forest biome	Continental	5.5875	8.09167	32.9579	0.8713	24	46.7	6.3	1002	31.1021	0.927622	63	2.87059	824.448	642	736
Sample609	57.74	27.06	Europe	Estonia:V?lam?	forest: temperate coniferous forest biome	Continental	4.74167	7.3	30.7809	0.959	26	52.7	5.3	1299	27.6917	0.913386	233	2.86013	835.502	684	713
Sample610	57.95	27.21	Europe	Estonia:Leevi	forest: temperate broadleaf forest biome	Continental	5.44583	7.85833	33.4741	0.8467	25	49.7	5.8	802		0.181473	70	2.86013	859.885	631	745
Sample611	58.44	26.71	Europe	Estonia:Vasula lakeside	forest: temperate coniferous forest biome	Continental	5.35417	8.10833	35.0409	0.8404	30	51.4	5.9	1393	33.4692	0.300361	54	2.76078	850.664	617	734
Sample612	58.47	26.73	Europe	Estonia:Vasula manor	forest: temperate broadleaf forest biome	Continental	5.2875	8.125	34.8116	0.8455	22	50.3	6.3	1097	35.1368	0.721782	46	2.76078	849.832	614	726
Sample613	58.47	26.73	Europe	Estonia:Vasula park	forest: temperate broadleaf forest biome	Continental	5.2875	8.125	34.8116	0.8455	22	50.3	6.3	1097	35.1368	0.721782	46	2.76078	849.832	614	726
Sample614	58.36	26.74	Europe	Estonia:Tartu:Turu 34a	anthropogenic: rangeland biome	Continental	5.64583	8.175	35.3417	0.8162	52					0.884072	40	2.76078	860.255	617	755
Sample645	58.09	26.64	Europe	Estonia:Valgj?ve park	anthropogenic: village biome	Continental	4.92083	7.75833	32.3153	0.9204	22					0.438199	188	2.76078	835.517	657	713
Sample646	58.14	26.94	Europe	Estonia:Koorvere	forest: temperate broadleaf forest biome	Continental	5.3375	7.975	33.8764	0.8478	26	56.2	5.8	981	31.175	0.140081	73	2.76078	856.221	624	736
Sample647	57.73	27.22	Europe	Estonia:Vana-Saaluse	forest: temperate broadleaf forest biome	Continental	5.14167	7.53333	31.6266	0.8887	21	52.6	5.4	1133	29.7734	1.38674	166	2.86013	848.678	653	734
Sample648	57.58	27.21	Europe	Estonia:Hino	forest: temperate coniferous forest biome	Continental	4.93333	7.35	30.6126	0.9312	21					0.12269	187	2.86013	850.247	670	719
Sample649	57.59	27.06	Europe	Estonia:Naapka	forest: temperate broadleaf forest biome	Continental	4.87917	7.39167	29.5363	0.9519	24		5.2	934		0.536802	198	2.86013	846.982	682	716
Sample650	57.61	26.97	Europe	Estonia:V?ke-Palkna	forest: temperate broadleaf forest biome	Continental	5.10833	7.5	30.0204	0.9357	20	55.8	5.3	1326		0.921624	171	2.86536	842.199	676	722
Sample651	57.71	27.07	Europe	Estonia:Vaskna	forest: temperate broadleaf forest biome	Continental	4.70833	7.33333	30.4892	0.9651	24	57.5	5.1	1176		1.06881	270	2.86013	836.817	686	710
Sample652	57.74	27.11	Europe	Estonia:Uue-Saaluse park	anthropogenic: village biome	Continental	4.85833	7.36667	31.0465	0.9363	22	53	5.4	1188		0.89163	218	2.86013	838.984	673	718
Sample653	58.21	27.47	Europe	Estonia:Haavassaar	forest: temperate broadleaf forest biome	Continental	5.58333	7.23333	35.2183	0.8046	14	53.8	5.3	1834	19.5796	0.932776	35	2.76078	861.656	605	751
Sample654	58.22	27.44	Europe	Estonia:Meeksi park	anthropogenic: village biome	Continental	5.4875	7.50833	34.4701	0.8145	14	50.3	5.6	1167	36.4002	0.124405	37	2.76078	865.493	609	747
Sample655	58.22	26.72	Europe	Estonia:Suure-Kambja park	anthropogenic: village biome	Continental	5.3	8	34.1653	0.8493	17	59.4	5.8	1430	28.0733	0.59305	73	2.76078	844.377	618	727
Sample656	58.18	26.76	Europe	Estonia:Savi	forest: temperate coniferous forest biome	Continental	5.15	7.9	34.2186	0.8639	22	60.1	5.2	1005	32.86	0.513239	103	2.76078	840.96	624	722
Sample657	58.27	26.74	Europe	Estonia:Uhti park	anthropogenic: village biome	Continental	5.38333	8.08333	34.6263	0.827	34	54.6	6.2	1233	34.47	0.441904	38	2.76078	848.858	608	735
Sample658	58.37	26.55	Europe	Estonia:Pihva	forest: temperate broadleaf forest biome	Continental	5.425	8.11667	34.142	0.8431	22	51.1	6.5	798	39.5497	0.545121	46	2.76078	846.559	620	735
Sample659	58.43	26.99	Europe	Estonia:P?klisaar	forest: temperate broadleaf forest biome	Continental	5.20833	8.15	35.0272	0.8309	12	51.7	6.2	1120	20.5067	0.168579	59	2.76078	860.525	608	731
Sample660	58.38	27.04	Europe	Estonia:Kavastu park	anthropogenic: village biome	Continental	5.32083	8.05833	34.2505	0.8256	24	48.7	6.1	1404	30.5254	0.168373	42	2.76078	859.42	608	736
Sample661	58.65	26.62	Europe	Estonia:Ehavere	forest: temperate broadleaf forest biome	Continental	5.12083	8.125	34.7285	0.8633	14	53.4	6.6	1001	36.0635	0.266737	78	2.70327	853.039	623	721
Sample662	58.65	26.6	Europe	Estonia:Luua park	anthropogenic: village biome	Continental	5.11667	8.13333	34.8146	0.866	26	48.9	5.6	1253	35.9819	0.822331	89	2.70327	851.665	625	721
Sample663	58.73	26.53	Europe	Estonia:Kuremaa parkmets	forest: temperate broadleaf forest biome	Continental	5.14583	8.04167	33.492	0.8798	18					0.409594	95	2.70327	849.547	636	722
Sample664	58.73	26.53	Europe	Estonia:Kuremaa	forest: temperate broadleaf forest biome	Continental	5.14583	8.04167	33.492	0.8798	18					0.409594	95	2.70327	849.547	636	722
Sample665	58.73	26.53	Europe	Estonia:Kuremaa j?v	forest: temperate broadleaf forest biome	Continental	5.14583	8.04167	33.492	0.8798	18					0.409594	95	2.70327	849.547	636	722
Sample666	58.78	26.5	Europe	Estonia:Laiuse park	anthropogenic: village biome	Continental	5.04167	8.06667	34.3039	0.8817	26	48.5	6	1008		1.99514	113	2.70327	845.807	635	720
Sample667	58.69	26.46	Europe	Estonia:Kassinurme	forest: temperate broadleaf forest biome	Continental	5.15833	8.15	33.7686	0.874	29	50.4	6.3	1024		0.910319	80	2.7085	846.755	632	723
Sample668	57.77	26.3	Europe	Estonia:Pikkj?ve	forest: temperate broadleaf forest biome	Continental	5.50417	8.175	31.6294	0.8774	16	50.1	5.5	1246		0.479759	64	2.87059	827.074	644	733
Sample669	57.76	26.3	Europe	Estonia:Karula park	anthropogenic: village biome	Continental	5.49583	8.175	31.3715	0.883	16	52.5	5.7	1359	32.98	0.554195	67	2.87059	827.333	647	732
Sample670	57.72	26.28	Europe	Estonia:Koikk?a	anthropogenic: village biome	Continental	5.4375	8.15833	31.776	0.8985	12	52.9	5.7	1383		0.39971	79	2.87059	823.932	653	726
Sample671	57.59	26.3	Europe	Estonia:Ivaski	forest: temperate coniferous forest biome	Continental	5.57917	8.20833	33.4167	0.8675	8	46.8	6.5	926	41.6825	0.282992	57	2.87059	825.049	637	734
Sample672	57.61	26.26	Europe	Estonia:Parnigu	woodland: woodland: temperate woodland biome	Continental	5.55833	8.13333	33.332	0.8755	8	51.1	5.4	1468	29.7029	0.661955	57	2.87059	824.193	641	732
Sample673	57.68	26.2	Europe	Estonia:Koiva	forest: temperate broadleaf forest biome	Continental	5.55833	8.11667	32.2773	0.8922	13	53.4	5.5	1396	32.6177	0.210005	54	2.87059	821.218	651	729
Sample674	57.7	26.24	Europe	Estonia:Lepa	forest: temperate coniferous forest biome	Continental	5.44583	8.125	31.6635	0.8892	29	50.1	5.4	1059		0.294931	76	2.87059	821.259	654	729
Sample675	59.35	28.14	Europe	Estonia:Narva	forest: temperate broadleaf forest biome	Continental	5.09583	7.475	33.7158	0.8593	54	62.6	5.1			0.173904	35	2.60915	875.527	645	750
Sample676	59.41	27.97	Europe	Estonia:Puhkova	forest: temperate broadleaf forest biome	Continental	4.84167	7.58333	35.2389	0.8629	26	57	5.3	1288	31.9405	0.731924	39	2.60392	866.07	623	721
Sample677	59.41	27.96	Europe	Estonia:Merik?a	forest: temperate broadleaf forest biome	Continental	4.8375	7.55833	35.1007	0.8658	26	59.4	5.1	1364	31.4767	0.826954	35	2.60392	865.314	625	721
Sample678	59.39	27.85	Europe	Estonia:Pimestiku	forest: temperate broadleaf forest biome	Continental	4.85	7.51667	34.93	0.8601	22	62.4	5.3	1359	31.7185	0.787176	37	2.60392	866.319	624	725
Sample679	59.39	27.88	Europe	Estonia:Pimestiku	forest: temperate broadleaf forest biome	Continental	4.85	7.5	34.9164	0.8623	12	60.1	5.4	1383	30.7842	0.516601	38	2.60392	865.293	625	724
Sample680	59.38	27.86	Europe	Estonia:Sinim?	forest: temperate broadleaf forest biome	Continental	4.79167	7.51667	34.85	0.8667	20	57.9	5.6	997	31.0804	0.412696	52	2.60392	868.86	627	723
Sample681	58.56	23.27	Europe	Estonia:P?aste	forest: temperate broadleaf forest biome	Continental	6.55	6.25	34.9003	0.729	21	60.1	5.9	1075	33.225	0.334357	11	2.65621	792.255	558	765
Sample682	58.62	23.18	Europe	Estonia:Paenase	forest: temperate broadleaf forest biome	Continental	6.45833	6.15	35.9839	0.7392	24	59.6	6	1008	32.29	0.449076	17	2.65621	786.21	559	756
Sample683	58.57	23.23	Europe	Estonia:Suurem?sa park	forest: temperate broadleaf forest biome	Continental	6.50417	6.275	34.5223	0.7321	29	59.3	6.2	1089	33.5183	0.277904	17	2.65621	790.878	560	764
Sample684	58.54	23.09	Europe	Estonia:P?ip?lu	forest: temperate broadleaf forest biome	Continental	6.50417	6.14167	34.8301	0.7597	22	61.6	6	1203	35.9797	0.468167	13	2.65621	783.934	577	759
Sample685	58.59	23.08	Europe	Estonia:Koguva	forest: temperate broadleaf forest biome	Continental					22					0.582978	2	2.65621
Sample686	58.6	23.1	Europe	Estonia:Koguva	forest: temperate broadleaf forest biome	Continental	6.46667	6.06667	35.4351	0.7565	12	59.4	6	1243	34.912	0.503332	12	2.65621	784.739	568	750
Sample687	58.68	23.17	Europe	Estonia:N?mk?a	forest: temperate broadleaf forest biome	Continental									20.6333	0.708619	7	2.65621
Sample688	58.59	23.29	Europe	Estonia:M?a	forest: temperate broadleaf forest biome	Continental	6.53333	6.36667	35.1023	0.72	21	54.8	6.1	949	34.875	0.503154	14	2.65621	797.674	556	772
Sample689	58.56	23.28	Europe	Estonia:Raegma	forest: temperate coniferous forest biome	Continental	6.55	6.25	34.8502	0.7291	21	60.3	5.9	1346	31.9501	0.388649	16	2.65621	792.255	559	766
Sample690	58.59	23.18	Europe	Estonia:Linnuse	forest: temperate coniferous forest biome	Continental	6.49583	6.14167	34.9746	0.7422	21	60.5	6.1	960	33.4508	0.525325	14	2.65621	785.527	565	761
Sample691	58.54	23.04	Europe	Estonia:Tumala park	anthropogenic: village biome	Continental	6.47917	6.24167	33.6539	0.768	30	59.3	6.2	1276	33.7491	0.0579682	14	2.65621	781.372	583	759
Sample692	58.58	22.93	Europe	Estonia:?riku	woodland: woodland: temperate woodland biome	Continental	6.4875	5.975	34.7987	0.7849	22	63.4	5.8	1228	34.1075	0.141152	15	2.65621	765.522	592	754
Sample693	58.55	22.92	Europe	Estonia:Kuninguste	forest: temperate broadleaf forest biome	Continental	6.42917	6.175	33.6708	0.7947	22	62.3	5.9	1258	30.01	0.176452	21	2.65621	764.721	595	748
Sample694	58.58	22.84	Europe	Estonia:V?ma	forest: temperate broadleaf forest biome	Continental	6.56667	5.83333	33.6429	0.7924	18	62.3	5.8	1154	28.8613	0.103206	18	2.65621	752.69	601	758
Sample695	58.59	22.85	Europe	Estonia:Kavandi	forest: temperate broadleaf forest biome	Continental	6.55833	5.76667	34.3188	0.7864	22	64	6	1105	33.0392	0.188128	16	2.65621	754.203	595	756
Sample696	58.48	22.78	Europe	Estonia:Koikla park	anthropogenic: village biome	Continental	6.475	6.18333	32.0385	0.8141	15	59.6	6.1	992	33.7889	0.0579682	20	2.7085	755.845	613	752
Sample697	58.36	22.83	Europe	Estonia:Vanal?e	forest: temperate broadleaf forest biome	Continental	6.45417	6.325	31.6767	0.8072	19	58.5	6	937	36.8464	0.424099	16	2.7085	757.074	602	745
Sample698	58.38	22.92	Europe	Estonia:Rannak?a	forest: temperate broadleaf forest biome	Continental	6.5375	6.24167	32.4866	0.7814	20	60.9	6.1	1301	34.3565	0.124847	11	2.7085	761.225	590	755
Sample699	58.4	22.89	Europe	Estonia:T?iste	forest: temperate broadleaf forest biome	Continental	6.4875	6.34167	32.766	0.7941	16	61.3	6.1	984	32.2446	0.0553146	13	2.7085	763.161	598	752
Sample700	58.17	24.95	Europe	Estonia:Marana	forest: temperate coniferous forest biome	Continental	4.9625	7.00833	32.9255	1.019	17	53.2	5.5	1699	30.2379	0.55915	68	2.75555	852.769	694	681
Sample714	64.23	-20.63	Europe	Iceland:Laugarvatn	tundra biome	Polar/Montane	3.67083	4.90833	14.794	1.9025	9	57.7	5.5	1847		3.40376	93	2.41046	450.058	1017	534
Sample715	64.5	-21.4	Europe	Iceland:Vatnshornsskogur	tundra biome	Polar/Montane	3.425	5.18333	21.7946	1.6613	9						181	2.29542	461.108	900	541
Sample716	58.94	25.45	Europe	Estonia:Nehatu	anthropogenic: village biome	Continental	5.39583	8.25833	32.6067	0.9226	12	46.2	5.8	1193	36.1494	0.0289841	75	2.71372	842.136	687	744
Sample717	58.9	25.58	Europe	Estonia:Paide	anthropogenic: village biome	Continental	5.51667	8.31667	32.5139	0.9038	38	44.6	6.1	1166	31.96	0.115929	70	2.71372	845.446	681	753
Sample718	58.91	25.61	Europe	Estonia:M? park	anthropogenic: village biome	Continental	5.47083	8.275	32.4134	0.9021	35	43.6	6.1	949	33.9308	0.126357	71	2.71372	841.707	678	751
Sample719	58.89	25.72	Europe	Estonia:S?gvere park	anthropogenic: village biome	Continental	5.35833	8.3	32.4184	0.906	21	44.4	6.6	1012	35.4363	0.226299	78	2.71372	846.852	672	741
Sample720	58.8	25.67	Europe	Estonia:Laimetsa	forest: temperate broadleaf forest biome	Continental	5.40417	8.15833	32.0538	0.9083	13	45.7	5.5	1464	33.7882	0.183095	73	2.71372	838.111	672	739
Sample721	58.32	25.52	Europe	Estonia:Heimtali	forest: temperate broadleaf forest biome	Continental	5.31667	7.88333	31.5249	0.8938	26	46.7	5.7	1057	36.3346	1.15918	56	2.7817	859.565	647	723
Sample722	58.32	25.5	Europe	Estonia:Heimtali	forest: temperate broadleaf forest biome	Continental	5.2	7.86667	31.3162	0.9064	26	47.2	6.3	1176	37.4508	1.21131	82	2.7817	858.047	653	720
Sample723	58.3	25.5	Europe	Estonia:Vardi	forest: temperate broadleaf forest biome	Continental	5.20417	7.84167	31.8105	0.9114	26	49.4	6	1093	32.0821	0.364882	82	2.7817	856.068	655	718
Sample724	58.25	25.49	Europe	Estonia:P?dre	forest: temperate broadleaf forest biome	Continental	5.21667	7.73333	32.0376	0.9181	14	51.6	5.5	1410	32.0833	0.535606	71	2.80261	856.84	656	714
Sample725	58.21	25.46	Europe	Estonia:Ereste	forest: temperate broadleaf forest biome	Continental	5.14167	7.63333	31.5587	0.936	14	51.5	5.6	1355	36.5717	0.46342	71	2.80261	860.008	664	709
Sample726	58.27	25.62	Europe	Estonia:Paistu	anthropogenic: village biome	Continental	5.17917	7.90833	30.9874	0.9075	26	52.4	6	828	32.9235	1.22109	91	2.7817	852.124	651	717
Sample727	58.27	25.68	Europe	Estonia:T?bi	forest: temperate broadleaf forest biome	Continental	5.17917	7.90833	30.9845	0.9133	21	55.1	6	1110	35.1683	0.770188	99	2.7817	849.105	657	719
Sample728	58.32	25.78	Europe	Estonia:Mustapali	anthropogenic: village biome	Continental	5.4125	8.075	30.8106	0.8847	18	46.8	5.9	951	29.2625	0.440059	58	2.7817	845.15	646	730
Sample729	58.92	27.01	Europe	Estonia:Tammisp?	forest: temperate broadleaf forest biome	Continental	5.08333	7.6	36.0634	0.8361	17	50.5		1031	17.9617	0.310519	36	2.70327	857.569	599	716
Sample730	58.97	26.94	Europe	Estonia:Vadi	forest: temperate coniferous forest biome	Continental	4.8375	8.14167	36.3211	0.8566	13	41.1	5.4	1370	31.8265	0.316276	56	2.70327	859.58	609	710
Sample731	58.84	26.81	Europe	Estonia:K?nu	forest: temperate broadleaf forest biome	Continental	5.02083	8.10833	35.7933	0.8595	23	48.2	5.7	880	39.1735	0.595677	60	2.70327	851.051	613	713
Sample732	58.78	26.77	Europe	Estonia:Tarakvere	anthropogenic: village biome	Continental	5.02083	8.14167	35.1072	0.854	11	48.3	6	1193	38.2013	0.570955	67	2.70327	850.103	612	716
Sample733	58.49	26.23	Europe	Estonia:N?meotsa	forest: temperate coniferous forest biome	Continental	5.4625	8.19167	33.2517	0.8787	8	48.6	6	1530	29.1208	0.0554545	50	2.76078	835.731	644	732
Sample734	58.54	26.2	Europe	Estonia:Kirna	forest: temperate broadleaf forest biome	Continental	5.48333	8.15	32.6997	0.881	19	51.5	5.9	1294	32.4167	0.182592	55	2.7085	835.198	648	735
Sample735	57.98	25.92	Europe	Estonia:Patk?a	anthropogenic: village biome	Continental	5.425	8.16667	29.7996	0.9185	31	51.6	5.8	1025		0.392333	65	2.88105	843.536	668	727
Sample736	57.86	25.88	Europe	Estonia:Pedeli j?i	forest: temperate coniferous forest biome	Continental	5.3125	7.95833	30.3243	0.942	15	54.7	5.4	1502	29.844	0.331971	76	2.88105	832.538	674	715
Sample737	57.92	25.87	Europe	Estonia:Koork?a	anthropogenic: village biome	Continental	5.22917	8.09167	29.7968	0.9374	24	49.6	6	1079		0.714726	91	2.88105	841.545	674	718
Sample738	57.96	25.71	Europe	Estonia:Holdre	forest: temperate broadleaf forest biome	Continental	5.1	7.83333	30.6668	0.9506	24	58.7	5.3	970	29.3567	0.260855	95	2.88105	848.662	673	707
Sample739	58.01	25.55	Europe	Estonia:Lilli	forest: temperate coniferous forest biome	Continental	5.05417	7.55833	32.1727	0.9574	18	58.4	5.4	1334	30.6729	0.21898	104	2.7817	859.909	676	706
Sample740	58.03	25.77	Europe	Estonia:Liivaku	anthropogenic: village biome	Continental	5.12917	7.90833	30.3642	0.9369	12	58.6	5.1	972	35.4325	0.0289841	111	2.7817	844.303	669	714
Sample741	58.55	27.01	Europe	Estonia:Meoma	forest: temperate broadleaf forest biome	Continental	5.06667	7.93333	35.3947	0.8452	22	54	5.8	1459		0.448725	77	2.70327	852.633	608	719
Sample742	58.55	27.11	Europe	Estonia:Metsakivi	forest: temperate broadleaf forest biome	Continental	5.12917	7.94167	35.3197	0.8332	18	52.2	5.6	1040	34.2375	0.53057	60	2.70327	856.094	603	723
Sample743	58.61	27.12	Europe	Estonia:Alatskivi	forest: temperate broadleaf forest biome	Continental	5.04583	8.025	36.0856	0.8312	26	55.6	5.7	1310		0.857038	51	2.70327	862.173	603	725
Sample744	58.09	27.56	Europe	Estonia:Beresje	forest: temperate broadleaf forest biome	Continental	5.64583	7.15833	33.69	0.8063	4	51	5.5	1174	28.4633	0.0869522	30	2.76078	865.26	612	758
Sample745	58.1	27.49	Europe	Estonia:?ek?a	forest: temperate broadleaf forest biome	Continental	5.49583	7.64167	34.6763	0.8098	31	48.7	5.7	1234	32.9285	1.04582	49	2.76078	868.725	610	753
Sample746	58.13	27.53	Europe	Estonia:Perosoon?s	forest: temperate broadleaf forest biome	Continental	5.66667	7.15	34.0725	0.7969	4					0.0289841	32	2.76078	864.96	606	760
Sample747	58.1	27.48	Europe	Estonia:Ristipalo	forest: temperate coniferous forest biome	Continental	5.5125	7.70833	34.401	0.8106	31	48.1	6	1451	31.0917	0.159622	57	2.76078	868.657	612	754
Sample748	57.69	27.36	Europe	Estonia:Viitka	forest: temperate coniferous forest biome	Continental	4.9125	7.30833	32.183	0.9086	14	52.3	5.2	1112		0.173904	199	2.86013	846.388	658	724
Sample749	57.71	27.42	Europe	Estonia:Miikse	anthropogenic: village biome	Continental	4.94583	7.54167	31.42	0.8977	22	59.4	5.4	1267		0.417129	177	2.86013	854.056	653	727
Sample750	57.75	27.46	Europe	Estonia:Merem?	forest: temperate broadleaf forest biome	Continental	5.0625	7.575	32.3053	0.8808	26	56	5.8	929	33.7042	0.464287	144	2.86013	859.977	646	733
Sample751	57.84	27.2	Europe	Estonia:Tammsaare	forest: temperate broadleaf forest biome	Continental	5.4125	7.85833	32.1679	0.853	30	45.4	5.6	1237	36.5892	0.128087	98	2.86013	859.398	638	747
Sample752	58.62	25.92	Europe	Estonia:V?siku park	anthropogenic: village biome	Continental	5.43333	8.31667	32.4429	0.8809	26	50	6	1287	36.3658	0.0579682	56	2.71372	847.607	651	738
Sample753	58.69	25.74	Europe	Estonia:Eistvere park	anthropogenic: village biome	Continental	5.44583	8.225	32.8425	0.8833	16				30.9031	0.354104	63	2.71372	845.323	656	742
Sample754	58.7	25.89	Europe	Estonia:Adavere	anthropogenic: village biome	Continental	5.37917	8.25833	32.0103	0.8924	18	43	6.2	1342	32.111	0.160893	72	2.71372	845.199	658	737
Sample755	58.71	25.91	Europe	Estonia:Pajusi	forest: temperate coniferous forest biome	Continental	5.36667	8.31667	32.1564	0.8887	16	41.5	6.2	1387	35.8575	0.115936	66	2.71372	848.304	656	738
Sample756	58.69	25.95	Europe	Estonia:M?likvere	forest: temperate broadleaf forest biome	Continental	5.34583	8.29167	32.5228	0.8899	20	41.4	5.9	1062	30.7117	0.285922	73	2.71372	850.514	657	738
Sample757	58.66	26.08	Europe	Estonia:Lustivere	woodland: woodland: temperate woodland biome	Continental	5.375	8.26667	32.6365	0.8899	26	41.7	6.3	846	29.4208	0.238473	61	2.7085	850.56	654	734
Sample758	58.28	25.23	Europe	Estonia:Kahvena	forest: temperate broadleaf forest biome	Continental	5.08333	7.38333	32.259	0.9697	11	52.3	5.2	1376	29.1883	0.281697	68	2.80261	856.118	680	701
Sample759	58.45	24.77	Europe	Estonia:Taali	forest: temperate broadleaf forest biome	Continental	5.60417	7.09167	31.1402	0.9671	25	24.3	6	1282	36.3703	0.0289841	21	2.75555	838.189	703	723
Sample760	58.45	24.76	Europe	Estonia:Taali m?s	anthropogenic: village biome	Continental	5.62083	7.04167	31.4926	0.9671	25	26.2	6.1	1194	35.2383	0.128492	19	2.75555	838.36	700	723
Sample761	58.46	24.78	Europe	Estonia:Raudiv?ja	forest: temperate broadleaf forest biome	Continental	5.62083	7.05833	31.2523	0.9676	25	27	6.3	1167	34.277	0.12507	21	2.75555	836.678	701	724
Sample762	58.47	24.9	Europe	Estonia:Puussaare	anthropogenic: village biome	Continental	5.53333	7.13333	31.7501	0.9631	17	33	5.7	1013	30.0333	0.202888	25	2.75555	836.674	696	722
Sample763	58.57	25.28	Europe	Estonia:Kootsi	forest: temperate coniferous forest biome	Continental	5.50417	7.74167	31.5251	0.9309	15	50.9	5.9	1096	27.0067	0.125369	36	2.71372	842.519	679	729
Sample764	59.51	24.82	Europe	Estonia:Viimsi	forest: temperate broadleaf forest biome	Continental	5.62917	6.425	30.6589	0.9071	24					0.527029	10	2.56209	777.936	651	717
Sample765	59.63	25.77	Europe	Estonia:Haldi	forest: temperate coniferous forest biome	Continental										0.428706	1	2.56209
Sample766	59.64	25.76	Europe	Estonia:Viinistu	forest: temperate broadleaf forest biome	Continental						55.5	5.3	1695		0.528887	1	2.56209
Sample767	59.65	25.51	Europe	Estonia:Juminda	forest: temperate coniferous forest biome	Continental	5.37083	6.94167	31.1026	0.9185						0.672112	8	2.56209	772.182	651	708
Sample768	59.47	25.47	Europe	Estonia:S?tme	forest: temperate broadleaf forest biome	Continental	5.25417	7.525	31.3972	0.927	22	60.2	5.7	1003	31.5633	0	42	2.60392	816.134	669	721
Sample769	59.49	25.29	Europe	Estonia:Ubari	forest: temperate broadleaf forest biome	Continental	5.28333	7.23333	31.3395	0.9317	22	59	5	1452	29.1483	0.552324	40	2.60392	805.29	670	719
Sample770	59.47	25.16	Europe	Estonia:J?ala J?suu	forest: temperate broadleaf forest biome	Continental	5.42917	7.10833	31.0924	0.922	18	53.9	5.3	1075	30.3392	0.611311	16	2.60392	803.878	664	720
Sample771	59.5	25.09	Europe	Estonia:?gase Koljunukk	forest: temperate broadleaf forest biome	Continental	5.4875	6.89167	30.7381	0.9131	21				27.4463	1.37635	17	2.60392	792.921	657	719
Sample772	58.96	24.04	Europe	Estonia:R?ma	forest: temperate broadleaf forest biome	Continental	5.9875	7.40833	34.3744	0.8698	10	46	6.2	845	26.2368	0.171103	40	2.66667	816.726	665	764
Sample773	58.82	23.83	Europe	Estonia:Keskvere p?lusaar	forest: temperate broadleaf forest biome	Continental	6.1	7.7	35.1523	0.8393	20	59.1	6.7	904	32.8283	0.14492	16	2.65621	812.491	640	762
Sample774	58.83	23.86	Europe	Estonia:Keskvere	forest: temperate broadleaf forest biome	Continental	6.075	7.7	35.3665	0.8473	20	58.4	6	1333	29.6354	0.0869522	21	2.65621	811.935	645	761
Sample775	58.85	23.96	Europe	Estonia:Liivi m?s	anthropogenic: village biome	Continental	6.02083	7.69167	33.9358	0.8582	22	44.7	6.8	967	37.7688	0.231466	13	2.65621	814.732	652	759
Sample776	58.93	24.18	Europe	Estonia:Laukna puisniit	woodland: woodland: temperate woodland biome	Continental	5.97917	7.10833	33.1551	0.8848	20	58	6	1183	30.1379	0.267351	45	2.66667	810.548	674	761
Sample777	58.95	24.21	Europe	Estonia:Leevre	forest: temperate coniferous forest biome	Continental	5.9375	7.04167	32.6381	0.8929	12	51	6	1049	29.2792	0.450491	47	2.66667	811.049	680	760
Sample778	59.37	24.59	Europe	Estonia:Tammetalu	forest: temperate broadleaf forest biome	Continental	5.71667	6.71667	30.3727	0.9036	35	50.8	5.5	1130	31.887	0.682301	43	2.60392	798.258	670	741
Sample779	59.47	24.37	Europe	Estonia:Suurupi	forest: temperate broadleaf forest biome	Continental	5.92083	5.90833	31.8271	0.855	22				23.0752	0.915472	16	2.60392	778.429	626	732
Sample780	59.46	24.37	Europe	Estonia:Suurupi pank	anthropogenic: village biome	Continental	5.89583	5.925	32.2188	0.8639	22	63.3	4.7	1513	28.9648	1.17	25	2.60392	780.779	632	731
Sample781	59.32	24.35	Europe	Estonia:Valkse	forest: temperate broadleaf forest biome	Continental	5.87083	6.575	31.6807	0.8721	43	61.5	5.7	872	31.7557	0.547745	38	2.60392	809.982	658	754
Sample782	59.37	24.13	Europe	Estonia:Leetse	anthropogenic: village biome	Continental									18.0639	1.07659	14	2.60392
Sample783	59.38	24.04	Europe	Estonia:Paldiski	woodland: woodland: temperate woodland biome	Continental	6.61667	5.61667	33.6908	0.7729	16	63.2	5.8	1238	28.6638	1.6621	23	2.60392	802.667	621	803
Sample784	59.38	24.04	Europe	Estonia:Paldiski	woodland: woodland: temperate woodland biome	Continental	6.61667	5.61667	33.6908	0.7729	16	63.2	5.8	1238	28.6638	1.6621	23	2.60392	802.667	621	803
Sample785	59.38	24.04	Europe	Estonia:Paldiski	anthropogenic: village biome	Continental	6.61667	5.61667	33.6908	0.7729	16	63.2	5.8	1238	28.6638	1.6621	23	2.60392	802.667	621	803
Sample786	58.92	24.45	Europe	Estonia:Orgita m?s	anthropogenic: village biome	Continental	5.87917	6.975	31.2432	0.9344	35	24.3	6.3	877	31.6419	0.161411	44	2.66667	808.226	704	753
Sample787	58.93	24.39	Europe	Estonia:Rangu	woodland: woodland: temperate woodland biome	Continental	5.86667	6.91667	31.263	0.9294	18	44.4	5.6	1206	29.9775	0.103515	53	2.66667	805.66	699	752
Sample788	58.77	24.25	Europe	Estonia:Vana-Vigala Hirvepark	forest: temperate broadleaf forest biome	Continental	6	7.21667	31.5915	0.8929	13	37.8	6.2	984	32.6619	0.128706	25	2.66667	816.06	676	757
Sample789	58.67	24.48	Europe	Estonia:Libatse	woodland: woodland: temperate woodland biome	Continental	5.94583	6.85833	31.1649	0.9367	16	26	6.4	947	30.3025	0.125645	29	2.66667	814.23	703	750
Sample790	58.67	24.5	Europe	Estonia:Arase	forest: temperate broadleaf forest biome	Continental	5.89583	6.84167	31.4221	0.941	22	26.3	5.8	1241	33.2042	0.169704	35	2.70327	814.757	702	745
Sample791	58.77	24.47	Europe	Estonia:Velise	anthropogenic: village biome	Continental	5.94583	6.875	31.0496	0.9411	18	25.4	6.1	881	36.6425	0.115484	27	2.66667	811.299	703	746
Sample792	58.89	24.47	Europe	Estonia:Niidiaia tammik	woodland: woodland: temperate woodland biome	Continental	5.8375	7.05833	31.1941	0.9391	27	27	5.3	1283	31.3942	0	49	2.66667	808.692	704	749
Sample793	59.43	24.74	Europe	Estonia:Tallinna Hirvepark	anthropogenic: urban biome	Continental	5.93333	6.75	30.6472	0.9033	60					0.129186	30	2.60392	791.903	682	754
Sample794	59.45	24.86	Europe	Estonia:Tallinn:Pae	anthropogenic: rangeland biome	Continental	5.7125	6.99167	30.6126	0.8929	48					0.56925	43	2.60392	805.033	670	753
Sample795	59.1	24.82	Europe	Estonia:Seli m?sapark	anthropogenic: village biome	Continental	5.49167	7.33333	29.1517	0.9814	34	41.4	6.1	1419	34.265	0.0564433	66	2.60392	803.234	719	732
Sample796	59.1	24.92	Europe	Estonia:H?gla	forest: temperate broadleaf forest biome	Continental	5.40417	7.44167	30.0864	0.9832	14	46.8	5.9	1354	31.5181	0.112886	71	2.60392	805.514	716	728
Sample797	59.05	25.11	Europe	Estonia:Kuimetsa	woodland: woodland: temperate woodland biome	Continental	5.3	7.8	29.9226	0.9815	11	44.6	6.4	1094	30.6703	0.128908	73	2.60392	823.427	715	728
Sample798	59.05	25.02	Europe	Estonia:Atla	forest: temperate coniferous forest biome	Continental	5.35417	7.675	29.8804	0.9744	14	49.2	5.8	1563	31.0992	0.0579682	74	2.60392	816.607	713	731
Sample799	59.2	24.89	Europe	Estonia:Visja	forest: temperate broadleaf forest biome	Continental	5.45417	7.225	30.1266	0.9723	17	61.5	6.2	996	31.7542	0.0869522	69	2.60392	791.025	705	728
Sample800	58.18	26.91	Europe	Estonia:Tsopi	forest: temperate broadleaf forest biome	Continental	5.24583	7.975	34.4383	0.8492	34	56.7	5.5	903	36.6663	0.454871	90	2.76078	852.314	620	730
Sample801	58.4	26.69	Europe	Estonia:Tartu J?eserada	anthropogenic: village biome	Continental	5.4375	8.125	34.6559	0.8255	42	55.2	6.3	1131		0.933667	39	2.76078	855.706	611	740
Sample802	59	27.74	Europe	Estonia:Vasknarva	forest: temperate broadleaf forest biome	Continental	5.05833	6.96667	35.861	0.8545	10	61.9	5.7	1444	18.7217	0.116237	32	2.68758	870.527	621	726
Sample803	59.17	27.8	Europe	Estonia:Poruni	forest: temperate broadleaf forest biome	Continental	4.86667	7.65	36.2284	0.862	7	65.3	5	2062	30.8673	0.113121	50	2.60392	884.596	628	728
Sample804	59.11	27.58	Europe	Estonia:Kassisaare	forest: temperate coniferous forest biome	Continental	4.75833	7.71667	37.1132	0.8672	6	61	5	1859		0.207346	61	2.60392	882.019	624	719
Sample805	58.67	26.76	Europe	Estonia:Saarem?sa	anthropogenic: village biome	Continental	5.025	8.13333	35.1032	0.8524	19	54	6.1	1292	38.3767	0.715396	74	2.70327	852.54	613	719
Sample806	57.86	26.61	Europe	Estonia:Vaabina park	anthropogenic: village biome	Continental	5.34583	8.04167	31.4483	0.8839	26	46.7	6	769		0.488715	97	2.86536	839.346	647	731
Sample807	57.76	26.58	Europe	Estonia:Latiku	forest: temperate broadleaf forest biome	Continental	5.49583	7.80833	31.9026	0.8858	14	41.9	5.8	1212		0.834963	81	2.86536	825.504	649	732
Sample808	57.62	26.61	Europe	Estonia:M?iste park	anthropogenic: village biome	Continental	5.62917	7.99167	31.0795	0.8754	26	46.1	5.6	1122	32.9885	0.633923	66	2.86536	829.703	650	742
Sample809	57.59	26.65	Europe	Estonia:Tundu	forest: temperate broadleaf forest biome	Continental	5.6	7.9	31.0237	0.8808	14	44.4	6.1	1327	34.2422	0.184069	80	2.86536	829.079	655	743
Sample810	57.58	26.61	Europe	Estonia:Luustoja	anthropogenic: village biome	Continental	5.52917	7.875	31.4126	0.8899	22	46.8	6.1	1304	35.9953	0.756794	106	2.86536	826.134	658	739
Sample811	57.64	26.91	Europe	Estonia:Kellam?	forest: temperate coniferous forest biome	Continental	5.19583	7.65833	29.9696	0.9229	12	56.7	5.2	1106		0.53783	150	2.86536	840.469	672	728
Sample812	57.64	27.04	Europe	Estonia:Raagi	anthropogenic: village biome	Continental	4.83333	7.41667	29.3924	0.9644	12	52.3	5.4	1219	31.09	1.11671	215	2.86013	844.948	689	714
Sample813	58.39	25.74	Europe	Estonia:Uusna	forest: temperate broadleaf forest biome	Continental	5.40833	8.15	30.4514	0.8853	18	49.2	6.3	806	35.9033	0.140689	54	2.7817	849.866	649	733
Sample814	58.4	25.67	Europe	Estonia:Vana-V?du	forest: temperate broadleaf forest biome	Continental	5.38333	8.13333	30.5911	0.8768	18	48.7	5.8	1504	35.3225	0.326701	55	2.7817	851.198	643	733
Sample815	58.4	25.66	Europe	Estonia:Vana-V?du	forest: temperate broadleaf forest biome	Continental	5.4125	8.14167	30.7355	0.8686	29	49.4	5.9	1186	32.6579	1.20439	54	2.7817	852.619	639	735
Sample816	58.48	25.46	Europe	Estonia:Jaanioja	forest: temperate broadleaf forest biome	Continental	5.2625	8.00833	31.9011	0.9172	19	49.6	6	897	36.1458	0.675187	88	2.80261	852.39	668	728
Sample817	58.47	25.55	Europe	Estonia:S?gavere	forest: temperate broadleaf forest biome	Continental	5.15833	7.95	31.649	0.9157	29	52.7	5.9	1516		0.437823	126	2.7817	846.581	663	723
Sample818	58.36	25.59	Europe	Estonia:Viljandi:Valuoja park	anthropogenic: urban biome	Continental	5.40417	8.05833	31.1229	0.884	52	49.1				0.953377	89	2.7817	857.8	649	734
Sample819	58.36	25.59	Europe	Estonia:Viljandi:Valuoja park	anthropogenic: urban biome	Continental	5.40417	8.05833	31.1229	0.884	52	49.1				0.953377	89	2.7817	857.8	649	734
Sample820	58.36	27.29	Europe	Estonia:Leego	forest: temperate coniferous forest biome	Continental	5.38333	7.9	35.2019	0.8116	17	50.4	6	1252	27.4258	0.114255	36	2.76078	868.333	603	742
Sample821	58.28	27.38	Europe	Estonia:Haavametsa	forest: temperate broadleaf forest biome	Continental	5.42917	7.55833	34.7245	0.8185	22	51.5	5.4	1325	36.84	0.182434	48	2.76078	859.47	608	742
Sample822	57.91	27.7	Europe	Estonia:Lutep?	forest: temperate broadleaf forest biome	Continental	5.49167	7.58333	34.6509	0.8291	14	52.6	5.4	887		0.230357	56	2.86013	864.554	624	752
Sample823	57.94	27.29	Europe	Estonia:Meenikunno	forest: temperate coniferous forest biome	Continental	5.47083	7.875	34.2363	0.8415	13	57.5	6.4	718	32.3007	0.115936	70	2.86013	864.642	629	747
Sample824	58.1	26.01	Europe	Estonia:Kaubi	forest: temperate broadleaf forest biome	Continental	5.4875	8.175	30.9756	0.8942	22	52.4	6.4	841		0.167109	47	2.76078	838.543	654	731
Sample825	58.1	25.9	Europe	Estonia:Riidaja	forest: temperate broadleaf forest biome	Continental	5.29167	8.11667	30.2544	0.9131	22	49.5	5.7	784		0.419978	86	2.7817	839.569	661	723
Sample826	58.04	25.8	Europe	Estonia:Rubina	forest: temperate broadleaf forest biome	Continental	5.17917	7.925	30.3155	0.9365	14	54.7	5.5	1132		0.393075	102	2.7817	842.414	671	716
Sample827	58.14	25.69	Europe	Estonia:Virsti	anthropogenic: village biome	Continental	5.1	7.81667	31.1303	0.9316	26	60.7	5.4	1535	31.9306	0.394101	109	2.7817	850.973	665	713
Sample828	58.14	25.68	Europe	Estonia:Muti	forest: temperate coniferous forest biome	Continental	5.07917	7.79167	31.0939	0.9349	14	57.6	5.5	1821	30.38	0.319391	109	2.7817	849.1	666	712
Sample829	59.03	25.64	Europe	Estonia:S?eru	forest: temperate broadleaf forest biome	Continental	5.22083	8.325	33.128	0.9238	10	44.6	6.1	1371	30.3465	0.116322	75	2.60392	842.26	679	734
Sample830	58.99	25.08	Europe	Estonia:Vana-Kaiu	forest: temperate broadleaf forest biome	Continental	5.375	7.63333	30.049	0.9835	7	48.1	6.2	1166		0.126589	79	2.71372	813.722	718	730
Sample831	58.91	24.93	Europe	Estonia:Ohekatku	anthropogenic: village biome	Continental	5.475	7.45	29.6315	0.9912	30	48.5	6.3	1038	32.7442	0.347866	72	2.70327	821.685	726	732
Sample832	58.9	25.1	Europe	Estonia:K?va	forest: temperate broadleaf forest biome	Continental	5.38333	7.66667	30.22	0.9762	15	45.1	6.5	1026		0.26365	78	2.71372	822.102	714	731
Sample833	58.92	25.18	Europe	Estonia:Saunametsa	forest: temperate broadleaf forest biome	Continental	5.35	7.8	30.3671	0.9766	6	39.5	5.9	1552	35.6338	0.103507	76	2.71372	822.195	711	727
Sample834	57.94	27.65	Europe	Estonia:Verhulitsa	forest: temperate broadleaf forest biome	Continental	5.52917	7.625	35.2104	0.819	12	53.6	5.4	1284		0.666854	39	2.86013	867.867	617	753
Sample835	58.95	23.74	Europe	Estonia:L?nemaa:Taebla	woodland: woodland: temperate woodland biome	Continental	6.05833	7.71667	36.1542	0.8482	29	59.2	6.7	894	28.4633	0.128838	18	2.65621	814.711	640	756
Sample836	58.93	23.59	Europe	Estonia:L?nemaa:Uuem?sa	woodland: woodland: temperate woodland biome	Continental	6.2375	6.975	36.0261	0.8123	54	65.9	6.1	1052	33.7057	0.183359	15	2.65621	804.411	618	760
Sample837	59.08	22.64	Europe	Estonia:Hiiumaa:Tahkuna	forest: temperate broadleaf forest biome	Continental	6.2875	5.00833	32.9003	0.8928	12	70.5	5.1	1787	25.4189	0.587314	4	2.58823	713.239	626	701
Sample838	58.89	23	Europe	Estonia:Hiiumaa:Vahtrepa	forest: temperate coniferous forest biome	Continental	6.525	5.55	35.4469	0.7994	15	69.5	5.9	1370	28.0217	0.619892	14	2.65621	762.056	603	754
Sample839	58.88	22.96	Europe	Estonia:Hiiumaa:P?alepa	woodland: woodland: temperate woodland biome	Continental	6.49167	5.61667	35.1127	0.8088	22	70.3	5.7	1501	33.3895	0.471457	19	2.65621	758.515	610	754
Sample840	58.87	22.94	Europe	Estonia:Hiiumaa:Suurem?sa	woodland: woodland: temperate woodland biome	Continental	6.51667	5.63333	35.0507	0.8116	19	69.4	5.9	1167	33.5475	0.128781	10	2.65621	759.013	614	756
Sample841	58.82	23.07	Europe	Estonia:Hiiumaa:Kaevatsi	shrubland: temperate shrubland biome	Continental	6.96667	5.3	35.0654	0.7254	19					0.0869522	2	2.65621	778.896	581	800
Sample842	58.87	22.94	Europe	Estonia:Hiiumaa:Suurem?sa park	anthropogenic: village biome	Continental	6.51667	5.63333	35.0507	0.8116	19	69.4	5.9	1167	33.5475	0.128781	10	2.65621	759.013	614	756
Sample843	58.84	23.04	Europe	Estonia:Hiiumaa:Sarve	woodland: woodland: temperate woodland biome	Continental	6.59167	5.41667	35.7171	0.7802	19	65.8	6.1	1352	32.5228	0.335019	9	2.65621	770.395	593	759
Sample844	58.85	23	Europe	Estonia:Hiiumaa:Soonlepa	forest: temperate broadleaf forest biome	Continental	6.56667	5.5	35.0257	0.7921	19	69.5	6.1	1081	32.6428	0.295203	7	2.65621	767.162	600	757
Sample845	58.8	22.84	Europe	Estonia:Hiiumaa:Kassari Esik?a	forest: temperate broadleaf forest biome	Continental	6.54583	5.50833	34.7685	0.8158	22	75.6	6.1	1320	35.4697	0.408449	13	2.65621	763.962	615	753
Sample846	58.99	22.8	Europe	Estonia:Hiiumaa:Hausma	forest: temperate coniferous forest biome	Continental	6.34583	5.39167	34.2217	0.8712		75.6	5.3	1540	29.2776	0.750316	21	2.65621	739.451	635	728
Sample847	58.84	22.78	Europe	Estonia:Hiiumaa:Putkaste	woodland: woodland: temperate woodland biome	Continental	6.43333	5.63333	33.9877	0.8483	30	64.6	6.2	1209	33.4656	0.206858	10	2.65621	753.245	630	742
Sample848	58.76	22.8	Europe	Estonia:Hiiumaa:Kassari S?retirp	woodland: woodland: temperate woodland biome	Continental	6.48333	5.55	34.1952	0.824						0	0	2.65621	758.75	612	742
Sample849	58.79	22.83	Europe	Estonia:Hiiumaa:Kassari	anthropogenic: village biome	Continental	6.52917	5.50833	34.5741	0.8167	22	75.2	5.9	1236	33.2883	0.51786	12	2.65621	761.686	613	750
Sample850	58.99	22.44	Europe	Estonia:Hiiumaa:K?gessaare ninaots	forest: temperate coniferous forest biome	Continental									24.3488	0.204783	3	2.65621
Sample851	58.98	22.46	Europe	Estonia:Hiiumaa:K?gessaare park	anthropogenic: village biome	Continental	6.33333	5.2	31.8954	0.8723	12	68.6		1155	31.2592	0.598287	13	2.65621	720.001	622	713
Sample852	58.93	22.39	Europe	Estonia:Hiiumaa:Luidja	forest: temperate broadleaf forest biome	Continental	6.2375	5.24167	30.8152	0.8879	16				30.1808	0.670492	7	2.65621	712.394	622	700
Sample853	58.83	22.63	Europe	Estonia:Hiiumaa:M?namaa	forest: temperate broadleaf forest biome	Continental	6.33333	5.66667	32.8908	0.8612	18	75.6	5.8	1230	32.1336	0.293159	23	2.65621	735.911	636	738
Sample854	58.72	22.47	Europe	Estonia:Hiiumaa:Tohvri	forest: temperate coniferous forest biome	Continental	6.49167	5.21667	32.0407	0.8397	15					0.279109	4	2.65621	719.801	609	725
Sample855	58.7	22.52	Europe	Estonia:Hiiumaa:S?u	forest: temperate broadleaf forest biome	Continental	6.39583	5.49167	32.1534	0.8456	19	65.4	5.8	1126	36.5582	0.392955	3	2.65621	726.049	613	723
Sample856	58.8	23.01	Europe	Estonia:Hiiumaa:Saarnaki	forest: temperate broadleaf forest biome	Continental						63	5.8	1667		0.126025	6	2.65621
Sample857	58.74	23.13	Europe	Estonia:Hiiumaa:Ahelaid	forest: temperate broadleaf forest biome	Continental										0	2	2.65621
Sample858	58.77	23.08	Europe	Estonia:Hiiumaa:Vareslaid	forest: temperate broadleaf forest biome	Continental										0	4	2.65621
Sample859	58.95	23.63	Europe	Estonia:L?nemaa:Herjava	woodland: woodland: temperate woodland biome	Continental	6.20833	7.1	36.0405	0.8234	40	67.4	6.2	965	33.6413	0.0579682	9	2.65621	805.012	623	756
Sample860	58.88	24.75	Europe	Estonia:Purku	anthropogenic: village biome	Continental	5.60833	7.2	29.831	0.9999	20	45.7	6.7	794	33.9483	0.35589	56	2.70327	809.065	733	733
Sample861	58.69	24.97	Europe	Estonia:Kobra	forest: temperate broadleaf forest biome	Continental	5.55	7.36667	30.5367	0.9639	14	50.3	5.7	1451	29.4985	0.169788	48	2.70327	826.851	709	735
Sample862	58.72	25.06	Europe	Estonia:V?dula	forest: temperate broadleaf forest biome	Continental	5.5125	7.54167	31.262	0.9691	14	53.7	5.6	1654		0.177215	53	2.71372	827.233	709	731
Sample884	58.06	27.31	Europe	Estonia:V?k?a	forest: temperate broadleaf forest biome	Continental	5.45417	7.84167	34.0869	0.8315	25	47.1	5.7	1107		0.221069	53	2.76078	867.249	622	747
Sample885	58.13	27.33	Europe	Estonia:Saar???40		Continental	5.42083	7.99167	34.7206	0.8231	14	47.2	5.9	1094	33.4283	0	53	2.76078	868.602	615	747
Sample886	58.17	27.3	Europe	Estonia:Terepi	forest: temperate broadleaf forest biome	Continental	5.39583	7.95833	34.5655	0.8277	16	49.9	6.1	1101		0	51	2.76078	866.622	617	745
Sample887	57.73	27.36	Europe	Estonia:Vana-Vastseliina park	woodland: woodland: temperate woodland biome	Continental	5.125	7.51667	32.0987	0.879	26	50.2	5.3	893	29.976	1.03776	152	2.86013	855.295	646	734
Sample888	57.76	27.48	Europe	Estonia:Serga	forest: temperate coniferous forest biome	Continental	5.12083	7.64167	32.6875	0.8735	14	54	5.7	888	26.5823	0.682785	136	2.86013	860.495	642	734
Sample889	57.76	27.48	Europe	Estonia:Serga	forest: temperate broadleaf forest biome	Continental	5.12083	7.64167	32.6875	0.8735	14	54	5.7	888	26.5823	0.682785	136	2.86013	860.495	642	734
Sample890	57.85	27.2	Europe	Estonia:Lasva	forest: temperate broadleaf forest biome	Continental	5.40833	7.86667	31.6924	0.8509	22	42	5.5	1045	31.2078	0.26648	98	2.86013	860.314	638	749
Sample891	58.64	24.32	Europe	Estonia:Helenurme	forest: temperate broadleaf forest biome	Continental	6.04167	6.9	32.055	0.9056	19	52.6	5.9	1092	31.7848	0.125569	27	2.66667	810.311	680	750
Sample892	58.61	24.18	Europe	Estonia:Naissoo	forest: temperate broadleaf forest biome	Continental	5.9875	7.14167	32.4838	0.8796	21	60.7	5.8	927	30.3526	0.125469	30	2.66667	811.755	660	750
Sample893	58.62	24.04	Europe	Estonia:Tarva	forest: temperate broadleaf forest biome	Continental	6.04583	7.225	33.2738	0.8449	11	59.7	6.3	820	28.1385	0.182596	23	2.66667	813.632	639	756
Sample894	58.62	24.04	Europe	Estonia:Tarva	forest: temperate broadleaf forest biome	Continental	6.04583	7.225	33.2738	0.8449	11	59.7	6.3	820	28.1385	0.182596	23	2.66667	813.632	639	756
Sample895	58.61	23.97	Europe	Estonia:Karin?me	forest: temperate broadleaf forest biome	Continental	6.075	7.28333	33.6628	0.8293	11	50.8	6.3	645	30.5558	0.173904	26	2.65621	814.392	631	760
Sample896	58.69	23.69	Europe	Estonia:Petaaluse	forest: temperate broadleaf forest biome	Continental	6.31667	7.03333	33.9281	0.7953	19	65.3	6.1	1253	33.3055	0.407076	20	2.65621	811.391	611	768
Sample897	58.68	23.53	Europe	Estonia:M?sak?a	woodland: woodland: temperate woodland biome	Continental	6.48333	6.51667	33.3967	0.7643	16	61.2	5.9	877	31.4871	0.188505	16	2.65621	815.133	590	771
Sample898	58.46	23.83	Europe	Estonia:?nikse	forest: temperate broadleaf forest biome	Continental	6.225	6.83333	33.5228	0.7768	12	61.9	5.7	1157	29.4675	0	40	2.7085	809.395	595	765
Sample899	58.56	23.72	Europe	Estonia:Vetla m?sapark	anthropogenic: village biome	Continental	6.3625	6.95833	32.2623	0.7799	20	60.8	6.1	1140	37.2125	0.321195	11	2.65621	816.345	600	769
Sample900	58.54	23.72	Europe	Estonia:Paadrema	forest: temperate broadleaf forest biome	Continental	6.36667	6.95	31.9776	0.7701	20	57.9	6.1	965	34.6989	0.173904	6	2.65621	817.489	591	767
Sample901	58.39	23.84	Europe	Estonia:Kolga	forest: temperate coniferous forest biome	Continental	6.22917	6.725	32.8672	0.7689	12	59.2	5.6	1122	27.9554	0.276501	22	2.7085	806.436	579	752
Sample902	58.43	23.7	Europe	Estonia:Haapsi	forest: temperate broadleaf forest biome	Continental	6.33333	6.43333	32.0077	0.7623	15	56	5.7	1517	32.0402	0.984587	9	2.7085	801.466	573	751
Sample903	58.43	23.7	Europe	Estonia:Haapsi	forest: temperate broadleaf forest biome	Continental	6.33333	6.43333	32.0077	0.7623	15	56	5.7	1517	32.0402	0.984587	9	2.7085	801.466	573	751
Sample904	58.43	23.7	Europe	Estonia:Haapsi	forest: temperate broadleaf forest biome	Continental	6.33333	6.43333	32.0077	0.7623	15	56	5.7	1517	32.0402	0.984587	9	2.7085	801.466	573	751
Sample905	58.55	23.6	Europe	Estonia:Pivarootsi	forest: temperate broadleaf forest biome	Continental	6.48333	6.51667	32.0252	0.7655	24	57.9	5.8	1060	30.17	0.323625	8	2.65621	815.206	586	765
Sample906	58.59	23.58	Europe	Estonia:Laelatu Kasselaht	forest: temperate broadleaf forest biome	Continental	6.56667	6.43333	32.0881	0.7638	28	62	5.8	1339	26.9983	0.0579682	11	2.65621	815.953	593	776
Sample907	58.56	23.55	Europe	Estonia:L?nemaa:Puhtu	forest: temperate broadleaf forest biome	Continental	6.6125	6.19167	32.0313	0.7577	20	55.8	5.6	1206		0.0555671	10	2.65621	815.339	589	777
Sample908	58.65	23.62	Europe	Estonia:Massu park	anthropogenic: village biome	Continental	6.4375	6.84167	33.1776	0.7749	24	65.5	6.3	978	29.9944	0.27854	14	2.65621	817.886	604	779
Sample909	58.65	23.62	Europe	Estonia:Massu park	anthropogenic: village biome	Continental	6.4375	6.84167	33.1776	0.7749	24	65.5	6.3	978	29.9944	0.27854	14	2.65621	817.886	604	779
Sample910	58.61	23.81	Europe	Estonia:Kunila	forest: temperate broadleaf forest biome	Continental	6.22083	7.10833	33.6985	0.805	16	70.4	5.9	1072	33.6748	0.166913	21	2.65621	809.572	615	763
Sample911	59.49	26.52	Europe	Estonia:Linnuse park	anthropogenic: village biome	Continental	5.36667	7.48333	34.8938	0.7968	43	58.3	6.3	1165	29.8903	0.064018	54	2.60392	821.665	595	746
Sample912	59.51	26.54	Europe	Estonia:Kunda	forest: temperate broadleaf forest biome	Continental	5.60417	7.29167	35.8837	0.7537	27	42.9	5.4	1284	28.3375	1.29458	16	2.5464	815.39	572	758
Sample913	59.5	26.52	Europe	Estonia:Kunda	anthropogenic: urban biome	Continental	5.40417	7.425	33.8032	0.7972	43	58.7	6.2	1068		0.320154	54	2.60392	820.046	596	747
Sample914	59.51	26.57	Europe	Estonia:Simunam?	forest: temperate broadleaf forest biome	Continental	5.48333	7.3	36.2745	0.7649	27	47	5.1	1372	33.1825	1.32391	33	2.5464	813.308	574	750
Sample915	58.7	26.91	Europe	Estonia:Kiisli	forest: temperate broadleaf forest biome	Continental	5.00833	8.1	34.9194	0.8527	19	53.2	6	960	35.1778	0.365257	77	2.70327	851.746	610	714
Sample916	58.6	27.13	Europe	Estonia:Alatskivi manor park	anthropogenic: village biome	Continental	5.125	8.03333	35.9907	0.8319	26	61.6	6.1	1129		0.266719	49	2.70327	862.384	604	726
Sample917	58.29	26.95	Europe	Estonia:Kriimani	anthropogenic: village biome	Continental	5.27917	8.025	34.8694	0.8366	26	56.5	6.3	1005	30.3446	0.4382	60	2.76078	855.178	611	730
Sample918	58.04	26.76	Europe	Estonia:Sirvaste	forest: temperate broadleaf forest biome	Continental	5.12083	7.85833	33.0891	0.8787	22	53.1	5.4	1311	29.8717	0.24784	141	2.76078	842.988	638	726
Sample919	58.01	26.67	Europe	Estonia:Karste	anthropogenic: village biome	Continental	4.92083	7.84167	32.5588	0.9255	22	53.3	5.8	1340		0.828926	182	2.76078	836.99	657	709
Sample920	58	26.68	Europe	Estonia:Karste	forest: temperate broadleaf forest biome	Continental	5.05417	7.84167	32.6789	0.9109	26	51.9	5.4	1452	37.165	0.862233	152	2.86536	838.496	652	715
Sample921	57.54	26.45	Europe	Latvia:Markuze Gauda	anthropogenic: village biome	Continental	5.57083	7.975	32.6909	0.8785	9	45.6	5.8	875	33.1729	0.550681	91	2.87059	822.011	650	739
Sample922	57.52	26.49	Europe	Latvia:Gaujiena	forest: temperate broadleaf forest biome	Continental	5.5875	8.00833	32.0618	0.882	11	44.9	5.6	1316		0.398288	95	2.87059	821.689	654	741
Sample923	57.89	26.39	Europe	Estonia:Kakulaas	forest: temperate coniferous forest biome	Continental	5.44167	8.23333	32.1004	0.8707	26	50.3	5.2	1432	32.8072	0.231871	59	2.87059	835.393	638	732
Sample924	57.9	26.28	Europe	Estonia:Sangaste loss	forest: temperate broadleaf forest biome	Continental	5.3875	8.325	31.3715	0.8891	23	52.8	5.6	1642	34.7344	0.238761	57	2.87059	835.782	647	727
Sample925	57.9	26.28	Europe	Estonia:Sangaste lossipark	anthropogenic: village biome	Continental	5.3875	8.325	31.3715	0.8891	23	52.8	5.6	1642	34.7344	0.238761	57	2.87059	835.782	647	727
Sample926	57.93	26.24	Europe	Estonia:Tiidu	forest: temperate coniferous forest biome	Continental	5.36667	8.28333	30.8231	0.8961	26	54.7	5.4	1399		0.22591	60	2.87059	836.251	649	724
Sample927	57.96	26.27	Europe	Estonia:Keeni park	anthropogenic: village biome	Continental	5.27917	8.175	30.9423	0.9161	25	53.9	5.9	1143	34.2213	1.08881	71	2.87059	835.865	659	719
Sample928	57.7	26.46	Europe	Estonia:Kolski	forest: temperate coniferous forest biome	Continental	5.47917	7.79167	32.1067	0.886	14	53.9	5.3	1454	28.7	0.18449	106	2.87059	816.919	644	731
Sample929	57.51	26.61	Europe	Estonia:Naha	forest: temperate coniferous forest biome	Continental	5.58333	7.76667	30.8677	0.8942	15	50.3	5.3	959		0.180689	96	2.86536	818.8	663	741
Sample930	57.52	26.6	Europe	Estonia:Naha	forest: temperate broadleaf forest biome	Continental	5.57083	7.775	30.8544	0.8916	15	55.1	5.3	1172	32.5392	0.738936	99	2.86536	818.9	660	740
Sample931	58.01	26.46	Europe	Estonia:Hobusem?i	forest: temperate broadleaf forest biome	Continental	5.08333	7.78333	31.9326	0.9121	14	54.2	5.5	1291		0.294959	133	2.76078	832.522	654	717
Sample932	58.04	26.36	Europe	Estonia:Arula	forest: temperate broadleaf forest biome	Continental	4.97917	7.85833	31.1649	0.9397	18	52.2	5.8	1087		0.489509	172	2.76078	825.57	668	710
Sample933	57.98	26.36	Europe	Estonia:Harim?i	forest: temperate broadleaf forest biome	Continental	4.9625	7.875	31.1645	0.9467	21	49	5.4	1385		2.5845	159	2.87059	824.346	671	708
Sample934	57.96	26.35	Europe	Estonia:M?k?a	forest: temperate broadleaf forest biome	Continental	5.18333	7.91667	31.0599	0.921	26	47.8	5.8	1067		1.51078	92	2.87059	828.211	657	713
Sample935	57.95	26.38	Europe	Estonia:Restu	forest: temperate broadleaf forest biome	Continental	5.27083	8.00833	31.4576	0.8955	26	44.5	5.6	1481		0.582229	73	2.87059	829.549	653	722
Sample936	57.92	26.64	Europe	Estonia:Urvastem?sa	anthropogenic: village biome	Continental	5.18333	7.88333	31.9776	0.8955	14	58.5	6.3	862	32.7883	0.173904	126	2.86536	837.342	649	724
Sample937	57.97	26.59	Europe	Estonia:Kooraste Pikkj?ve	forest: temperate broadleaf forest biome	Continental	5.08333	7.8	32.9067	0.915	14	53.5	5.2	1560		0.185557	149	2.86536	833.108	654	714
Sample938	57.92	26.76	Europe	Estonia:Haamaste	anthropogenic: village biome	Continental	5.29583	7.875	32.4228	0.8867	14	58.5	5.6	1041		0.230383	106	2.86536	844.438	648	730
Sample939	59.39	27.46	Europe	Estonia:Kotinuka	forest: temperate broadleaf forest biome	Continental	4.61667	7.68333	38.0363	0.8864	39	61.8	5.3	1266	32.3324	0.286483	60	2.60392	875.618	629	709
Sample940	59.22	27.34	Europe	Estonia:Rajak?a	forest: temperate broadleaf forest biome	Continental	4.52917	8.05833	38.1455	0.8969	14	51.4	6	1295		0.113268	65	2.60392	888.867	635	707
Sample941	59.21	27.15	Europe	Estonia:Tarumaa	forest: temperate coniferous forest biome	Continental	4.73333	7.85	38.7532	0.8819	10	56	5.4	1153	30.1981	0.369332	58	2.60392	866.43	626	709
Sample942	59.18	27.15	Europe	Estonia:Heinassaare	forest: temperate broadleaf forest biome	Continental	4.70417	7.94167	38.6091	0.8781	6	62.6	4.8	1523	29.6483	0.849063	68	2.60392	872.841	624	710
Sample943	58.12	25.55	Europe	Estonia:Polli	anthropogenic: village biome	Continental	5.05833	7.81667	31.7749	0.9503	25	53.3	5.7	1288	37.7008	0.62827	92	2.7817	866.468	673	708
Sample944	57.98	25.55	Europe	Estonia:Teringi	forest: temperate coniferous forest biome	Continental	5.02917	7.54167	32.1061	0.9646	18	61.4	5.6	1229	29.7329	0.22053	103	2.88105	859.721	680	704
Sample945	57.99	25.56	Europe	Estonia:Perak?a	forest: temperate broadleaf forest biome	Continental	4.96667	7.55	31.7245	0.9668	18	59.6	5.5	1193	35.414	0.796068	105	2.88105	857.701	679	702
Sample946	58	25.55	Europe	Estonia:Lilli	forest: temperate broadleaf forest biome	Continental	4.99583	7.525	31.6903	0.968	18	60.7	5.9	992	33.2478	0.619888	105	2.88105	859.446	681	703
Sample947	58.68	24.69	Europe	Estonia:P?numaa:V?dra:Metsapere	forest: temperate broadleaf forest biome	Continental	5.71667	6.88333	30.6281	0.9754	19	43.6	5.5	1490	30.1723	0.0289841	44	2.70327	816.604	717	735
Sample948	58.68	24.7	Europe	Estonia:J?ve	anthropogenic: village biome	Continental	5.69167	6.93333	30.3595	0.9836	11	44.5	5.4	1551	30.4684	0.0628352	44	2.70327	817.334	721	732
Sample949	58.67	24.61	Europe	Estonia:P?ravere	forest: temperate coniferous forest biome	Continental	5.75	6.86667	30.79	0.9684	12	41.2	5.5	1418	28.5233	0.188467	46	2.70327	812.312	714	737
Sample950	58.67	24.62	Europe	Estonia:P?numaa:Halinga:P?ravere	anthropogenic: village biome	Continental	5.7625	6.875	30.8061	0.9682	12	41.1	6.4	1363	34.1994	0.176973	42	2.70327	813.131	714	737
Sample951	58.3	21.84	Europe	Estonia:H?geranna	forest: temperate broadleaf forest biome	Continental					13	64.7	6	1077		0.552361	7	2.70327
Sample952	58.29	21.85	Europe	Estonia:Karala	forest: temperate broadleaf forest biome	Continental	6.81667	4.75	32.3666	0.7658	13	65	5.9	1356	33.9895	0.664278	9	2.70327	721.571	578	754
Sample953	58.28	21.84	Europe	Estonia:Soeginina	forest: temperate broadleaf forest biome	Continental					13					0.497039	3	2.70327
Sample954	58.17	22.15	Europe	Estonia:M?dri	forest: temperate broadleaf forest biome	Continental	6.9625	5.29167	31.3154	0.7406	30	53.9	6	983	34.4258	0.637615	12	2.7085	738.765	576	777
Sample955	58.35	21.97	Europe	Estonia:Kuusn?me	forest: temperate broadleaf forest biome	Continental	6.80833	4.86667	31.4972	0.7759					18.5685	0.320266	3	2.70327	732.511	583	751
Sample956	58.12	22.21	Europe	Estonia:Ansek?a	forest: temperate broadleaf forest biome	Continental	7.01667	5.21667	31.5563	0.7358	22	65.6	5.8	1287	33.9922	0.420661	6	2.7085	737.669	576	782
Sample957	58.12	22.21	Europe	Estonia:Kaunispe	forest: temperate coniferous forest biome	Continental	7.01667	5.21667	31.5563	0.7358	22	65.6	5.8	1287	33.9922	0.420661	6	2.7085	737.669	576	782
Sample958	57.95	22.12	Europe	Estonia:M?tu park	anthropogenic: village biome	Continental	7.275	5.05	33.0345		15	53.5				0.591721	2	2.79216	746.892	557
Sample959	58.58	22.55	Europe	Estonia:Metsk?a	woodland: woodland: temperate woodland biome	Continental	6.475	5.58333	32.5739	0.8356	18	65.4	5.7	939	30.3958	0.313482	21	2.65621	729.799	618	739
Sample960	58.48	22.94	Europe	Estonia:Koigi	forest: temperate broadleaf forest biome	Continental	6.42083	6.34167	32.8684	0.7913	17	64.7	5.9	1241	28.9011	0.609823	15	2.7085	766.567	596	753
Sample961	58.54	24.07	Europe	Estonia:Kalli	woodland: woodland: temperate woodland biome	Continental	6.05	7.15	32.854	0.8376	10	50.2	6.1	973	29.4746	0.18794	26	2.66667	817.574	633	755
Sample962	58.48	24.33	Europe	Estonia:J?pre	anthropogenic: village biome	Continental	6.07917	6.84167	31.9091	0.8975	18	55.8	6.7	880	33.4308	0.114606	13	2.7451	818.512	670	746
Sample963	58.43	24.29	Europe	Estonia:P?numaa:Audru:K?bu	forest: temperate broadleaf forest biome	Continental	6.04167	6.7	32.5019	0.8948	27	58.6	6.2	1067	32.289	0.24046	17	2.7451	812.524	661	738
Sample964	58.54	26.28	Europe	Estonia:Altnurga	forest: temperate broadleaf forest biome	Continental	5.4125	8.175	33.1247	0.8776	15	51.2	6.2	1311	32.577	0.313232	49	2.7085	840.487	642	731
Sample965	58.55	26.38	Europe	Estonia:Puurmani	forest: temperate broadleaf forest biome	Continental	5.37917	7.99167	33.8299	0.8714	19	48.2	5.5	1941	34.6975	0.16916	67	2.7085	835.797	638	732
Sample966	58.58	26.44	Europe	Estonia:Sortsi	forest: temperate broadleaf forest biome	Continental	5.34167	8.05	33.4698	0.8619	14	45.9	5.4	1449	35.2059	0.310434	59	2.7085	839.445	630	730
Sample967	58.62	26.29	Europe	Estonia:M?nda	anthropogenic: village biome	Continental	5.31667	8.13333	33.9461	0.879	19	46.1	6.1	1729	31.34	0.265669	64	2.7085	842.683	642	730
Sample968	58.7	26.14	Europe	Estonia:Kaavere	forest: temperate broadleaf forest biome	Continental	5.25	8.13333	33.6534	0.8902	17	50.8	5.8	1081	33.5875	0.565726	76	2.7085	843.796	655	732
Sample969	58.02	24.68	Europe	Estonia:Nigula	forest: temperate broadleaf forest biome	Continental	5.10833	6.95	32.2614	1.0024	21	49	5.8	964	24.58	0.398627	61	2.75555	840.827	681	679
Sample970	57.95	24.62	Europe	Estonia:Kolbergi	anthropogenic: village biome	Continental	5.24167	6.93333	33.2723	0.9887	20	46.9	6.3	1155	30.7454	0.102681	49	2.8549	836.306	671	680
Sample971	57.98	24.67	Europe	Estonia:Tuuliku	forest: temperate broadleaf forest biome	Continental	5.1375	7.04167	32.4807	0.9907	24	45.2	6.1	1065	24.6679	0.399756	57	2.8549	847.279	676	682
Sample972	58.03	24.73	Europe	Estonia:Reinu	forest: temperate broadleaf forest biome	Continental	5.04583	7.00833	32.4383	1.01	20	44	6	1246	35.1221	0.287224	64	2.75555	846.325	685	678
Sample973	58.06	24.54	Europe	Estonia:Arumetsa	forest: temperate broadleaf forest biome	Continental	5.52917	6.80833	32.3786	0.9516	23	66.6	5.4	1326	32.2544	0.230589	24	2.75555	824.534	657	690
Sample974	57.53	27.33	Europe	Estonia:Parmu	forest: temperate coniferous forest biome	Continental	4.98333	7.33333	30.7727	0.9103	17	56	5.2	1828	33.0779	0.0579682	176	2.86013	847.54	659	723
Sample975	57.44	27.3	Europe	Latvia:Ploskums	forest: temperate broadleaf forest biome	Continental	5.075	7.4	30.9201	0.8937	9	57.2	5.4	1497		0.231871	154	2.93333	851.911	651	728
Sample976	57.5	27.1	Europe	Latvia:Lukumiesu	forest: temperate broadleaf forest biome	Continental	4.9375	7.275	28.8774	0.9551	10	58.2	5.5	1025		0.38498	189	2.93333	849.195	683	715
Sample977	57.63	27	Europe	Estonia:Luutsniku park	anthropogenic: village biome	Continental	4.99583	7.475	29.527	0.9484	20	55	5.5	992		0.973815	175	2.86013	844.273	683	720
Sample978	57.63	26.96	Europe	Estonia:Luutsniku	forest: temperate coniferous forest biome	Continental	5.1375	7.525	29.6283	0.9319	12	54.7	5.1	1300	30.2427	0.307013	159	2.86536	843.049	674	723
Sample979	58.29	26.55	Europe	Estonia:N?	forest: temperate broadleaf forest biome	Continental	5.3625	8.125	33.7416	0.8514	34	51.9	6.2	1281	35.6776	0.155058	75	2.76078	846.807	625	734
Sample980	58.25	26.71	Europe	Estonia:Kambja	forest: temperate broadleaf forest biome	Continental	5.29167	7.98333	34.5942	0.8463	14	52.2	6.3	767	28.7738	1.28917	72	2.76078	846.017	617	729
Sample981	59.43	25.02	Europe	Estonia:Maardu m?sapark	anthropogenic: village biome	Continental	5.39167	7.13333	30.4336	0.9416	46	51.9	6.6	1081	38.8471	0.191813	45	2.60392	806.237	682	724
Sample982	59.45	25.22	Europe	Estonia:Ruu	forest: temperate broadleaf forest biome	Continental	5.35	7.15	31.4071	0.9425	22	55.4	5.6	1337	32.6979	0.41329	39	2.60392	804.29	676	719
Sample983	59.45	25.27	Europe	Estonia:Kodasoo park	anthropogenic: village biome	Continental	5.3125	7.29167	31.3881	0.9454	25	58.9	5.5	989	31.2113	0.0579682	40	2.60392	810.309	674	717
Sample984	59.38	25.3	Europe	Estonia:Anija park	anthropogenic: village biome	Continental	5.3	7.48333	30.8336	0.9377	30	42.8	6.6	902	32.1725	0.0638579	46	2.60392	818.927	684	729
Sample985	59.16	25.43	Europe	Estonia:K?vandu	forest: temperate coniferous forest biome	Continental	5.16667	7.86667	31.8782	0.9678	10	50	5.3	1663	29.9994	0.335831	91	2.60392	820.821	699	722
Sample986	59.18	25.23	Europe	Estonia:Ravila	forest: temperate broadleaf forest biome	Continental	5.25	7.8	30.7457	0.9714	18	49.2	5.9	1008	31.3802	0.172183	64	2.60392	822.772	705	725
Sample987	59.18	25.22	Europe	Estonia:Ravila manor	forest: temperate broadleaf forest biome	Continental	5.24583	7.80833	30.8318	0.9695	29	46.9	5.9	1204	32.0308	0.210628	67	2.60392	822.829	704	726
Sample988	59.21	25.1	Europe	Estonia:Kose-Uuem?sa	forest: temperate broadleaf forest biome	Continental	5.37083	7.475	30.4126	0.9611	14	46.4	5.7	1299	30.9389	0.0579682	58	2.60392	806.608	698	726
Sample989	59.35	24.88	Europe	Estonia:Ameerikanurga	forest: temperate broadleaf forest biome	Continental	5.42083	7.25833	30.1386	0.9509	43	38.5	6.2	1007	29.9288	0.143148	47	2.60392	794.374	687	722
Sample990	59.35	24.96	Europe	Estonia:Vaskjala	forest: temperate broadleaf forest biome	Continental	5.37083	7.29167	30.3615	0.9536	39	42.2	6	1253	32.0701	0.103891	44	2.60392	798.767	685	718
Sample991	59.33	25.11	Europe	Estonia:Kalesi	forest: temperate broadleaf forest biome	Continental	5.26667	7.55	31.1267	0.9565	26	43.7	6.1	1368	29.0445	0.0869522	45	2.60392	813.481	689	720
Sample992	59.36	24.9	Europe	Estonia:Lehmja tammik	forest: temperate broadleaf forest biome	Continental	5.4	7.28333	30.1436	0.9513	39	40.6	6.4	916	24.6427	0	54	2.60392	799.528	686	721
Sample993	57.9	26.28	Europe	Estonia:Sangaste m?sapark	anthropogenic: village biome	Continental	5.3875	8.325	31.3715	0.8891	23	52.8	5.6	1642	34.7344	0.238761	57	2.87059	835.782	647	727
Sample994	57.9	26.28	Europe	Estonia:Lossik?a	forest: temperate broadleaf forest biome	Continental	5.3875	8.325	31.3715	0.8891	23	52.8	5.6	1642	34.7344	0.238761	57	2.87059	835.782	647	727
Sample995	59.03	25.71	Europe	Estonia:Roosna-Alliku park	anthropogenic: village biome	Continental	5.175	8.25	33.3582	0.9263	13	41.9		1066	31.9658	0.241501	82	2.60392	843.371	678	731
Sample996	59.1	25.7	Europe	Estonia:Seidla park	anthropogenic: village biome	Continental	5.12917	8.35833	32.4983	0.9332	18	45.6	6.5	1040	33.9598	0.464348	87	2.60392	849.819	683	731
Sample997	59.15	25.66	Europe	Estonia:Albu	forest: temperate broadleaf forest biome	Continental	5.12083	8.20833	32.1787	0.9356	18	46.6	6.2	1020	32.9038	0.142632	81	2.60392	841.909	682	728
Sample998	59.15	25.66	Europe	Estonia:Albu park	anthropogenic: village biome	Continental	5.12083	8.20833	32.1787	0.9356	18	46.6	6.2	1020	32.9038	0.142632	81	2.60392	841.909	682	728
Sample999	59.13	25.76	Europe	Estonia:Kurisoo	forest: temperate coniferous forest biome	Continental	5.0875	8.275	32.4466	0.9219	14	48.5	6.3	986	37.9277	0.340157	98	2.60392	849.307	676	733
Sample1000	59.13	25.85	Europe	Estonia:Rava tammik	forest: temperate broadleaf forest biome	Continental	4.9875	8.15833	33.7992	0.9276	17	51.9	6	1197	33.3858	0.268428	122	2.60392	842.108	676	728
Sample1001	59.12	25.85	Europe	Estonia:Rava	forest: temperate broadleaf forest biome	Continental	5.025	8.13333	33.9893	0.9233	17	53.1	6.2	1008	31.7775	0.183734	111	2.60392	842.401	673	728
Sample1002	59.11	25.8	Europe	Estonia:Orgmetsa	forest: temperate coniferous forest biome	Continental	5.05	8.2	33.1465	0.9277	14	49.9	6.8	963	28.0133	0.112916	103	2.60392	845.684	676	728
Sample1003	58.27	26.93	Europe	Estonia:Kalevipoja k?nivagu	forest: temperate broadleaf forest biome	Continental	5.27083	7.95833	34.9976	0.8422	26	58.9	6.3	1042	32.8592	0.887458	67	2.76078	851.532	615	730
Sample1004	58.24	27.22	Europe	Estonia:Uus-Kastmeoja	anthropogenic: village biome	Continental	5.3625	7.89167	34.5097	0.8253	22	52.7	5.9	1025		0.0622272	44	2.76078	861.84	611	740
Sample1005	58.27	27.07	Europe	Estonia:Imste	anthropogenic: village biome	Continental	5.35417	8.025	34.8596	0.832	16	51.1	6.4	1139		0.606992	49	2.76078	858.584	614	737
Sample1006	58.3	27.07	Europe	Estonia:Terikeste Hiiep?na	anthropogenic: village biome	Continental	5.325	8.01667	34.4412	0.8282	25	51.5	6.3	1357		0.412424	46	2.76078	857.906	611	737
Sample1007	58.38	26.96	Europe	Estonia:S?sk?a	forest: temperate broadleaf forest biome	Continental	5.34583	8.09167	34.9858	0.8257	26	47.3	6.2	1051	28.245	0.400522	43	2.76078	860.11	606	733
Sample1008	58.41	26.96	Europe	Estonia:Saba	forest: temperate broadleaf forest biome	Continental	5.23333	8.18333	35.1531	0.8282	22	47.5	6.2	1225		0.282649	57	2.76078	860.289	607	732
Sample1009	58.66	25.26	Europe	Estonia:Kurgja	forest: temperate coniferous forest biome	Continental	5.5	7.83333	31.6361	0.9388	10	59.3	5.8	1091	32.8746	0.188429	51	2.71372	838.584	689	733
Sample1010	58.68	25.51	Europe	Estonia:Ollepa	forest: temperate broadleaf forest biome	Continental	5.47917	8.15833	31.6656	0.8945	25	48.7	6.6	802	34.9608	0.173904	64	2.71372	843.546	666	744
Sample1011	58.69	25.7	Europe	Estonia:Kurla	forest: temperate broadleaf forest biome	Continental	5.46667	8.21667	32.7676	0.8892	23	44.8	6.2	1107	31.6808	0.0579682	61	2.71372	844.171	661	743
Sample1012	58.4	25.85	Europe	Estonia:Surva Mursi p?n	anthropogenic: village biome	Continental	5.5125	8.14167	31.3436	0.8812	26	48.3	6.5	820	31.2942	0.103055	46	2.7817	845.566	649	736
Sample1013	58.46	25.84	Europe	Estonia:Oja LKA	forest: temperate broadleaf forest biome	Continental	5.5125	8.09167	31.6102	0.8757	16	52.8	5.8	1350	28.7425	0.0579682	51	2.7817	836.332	644	735
Sample1014	58.46	25.83	Europe	Estonia:Parika	forest: temperate broadleaf forest biome	Continental	5.50833	8.08333	31.8403	0.8764	19	52.6	5.8	1331	30.7636	0.168745	55	2.7817	836.899	644	734
Sample1015	58.35	25.61	Europe	Estonia:Sammuli	forest: temperate broadleaf forest biome	Continental	5.34583	8.025	30.6434	0.8819	52	51.6	6	1051	37.8718	0.546641	82	2.7817	854.567	646	732
Sample1016	58.35	25.54	Europe	Estonia:Pinska Ritsu tamm	forest: temperate broadleaf forest biome	Continental	5.26667	7.93333	31.4567	0.8996	31	50.6	6.3	904	34.2318	0.504615	82	2.7817	855.178	652	724
Sample1017	58.38	25.33	Europe	Estonia:Leppoja	forest: temperate broadleaf forest biome	Continental	5.3125	7.64167	32.3833	0.9354	8	50	5.9	1270	34.8358	0.114309	49	2.80261	852.526	671	717
Sample1018	58.36	25.59	Europe	Estonia:Viljandi Valuoja park	anthropogenic: urban biome	Continental	5.40417	8.05833	31.1229	0.884	52	49.1				0.953377	89	2.7817	857.8	649	734
Sample1019	59	26.8	Europe	Estonia:P?na	forest: temperate coniferous forest biome	Continental	4.89167	8.08333	36.5897	0.862	28	49.5	5	1703	32.8431	0.51963	69	2.70327	851.191	613	711
Sample1020	59.11	26.64	Europe	Estonia:Muuga m?sapark	anthropogenic: village biome	Continental	4.9125	8.00833	36.1333	0.863	14	48.1	5.8	1196	32.4664	0.205252	96	2.60392	849.92	621	719
Sample1021	59.17	26.59	Europe	Estonia:Roela	forest: temperate coniferous forest biome	Continental	4.975	7.88333	36.5939	0.8542	39	49.6	5.6	1512		0.622818	97	2.60392	844.341	619	724
Sample1022	59.25	26.53	Europe	Estonia:Voore	forest: temperate coniferous forest biome	Continental	5.09583	7.74167	35.7825	0.8451	24	52.8	6.7	1023	36.5996	0.406261	91	2.60392	839.942	620	733
Sample1023	59.28	26.78	Europe	Estonia:Sirtsi	forest: temperate coniferous forest biome	Continental	4.925	7.65	37.0954	0.847	12	44.3	6.2	979	33.2478	0.0567377	80	2.60392	847.012	608	717
Sample1024	59.29	26.88	Europe	Estonia:Jalastu	forest: temperate coniferous forest biome	Continental	4.825	7.66667	37.3449	0.8582	16	52.2	5.3	1408		0.232479	79	2.60392	848.412	610	710
Sample1025	58.18	26.86	Europe	Estonia:Marga	forest: temperate broadleaf forest biome	Continental	5.25	7.95	33.9817	0.8545	26	56.7	6.5	1136	37.1128	0.280954	84	2.76078	849.989	622	727
Sample1026	50.81	4.38	Europe	Belgium:Brussels:Bois de la Cambre Ter Kamerenbos	anthropogenic: urban biome	Temperate	10.3458	7.275	11.2552	0.9456	56					1.14591	96	3.89543	556.876	819	866
Sample1027	57.62	27.18	Europe	Estonia:Selisoo	forest: temperate coniferous forest biome	Continental	4.94167	7.41667	30.9886	0.9334	13	58.6	5.2	1510	30.0467	0.324709	186	2.86013	852.099	672	719
Sample1028	57.64	27.09	Europe	Estonia:Ruusm?	forest: temperate broadleaf forest biome	Continental	4.7125	7.35833	29.6773	0.9715	16	52.4	5.4	1329		0.296765	238	2.86013	844.692	688	708
Sample1029	58.94	26.09	Europe	Estonia:V?nj?ve m?sapark	anthropogenic: village biome	Continental	5.25	8.23333	34.9171	0.8873	14		6.4		22.3629	0.128831	91	2.7085	847.904	654	737
Sample1030	58.94	26.07	Europe	Estonia:Ervita m?sapark	anthropogenic: village biome	Continental	5.22083	8.225	34.5633	0.8915	22	43.5	6.9	947	32.4581	0.337084	91	2.7085	847.133	657	736
Sample1031	58.97	25.94	Europe	Estonia:Tudre	woodland: woodland: temperate woodland biome	Continental	5.175	8.26667	33.8112	0.9052	17	44.9	6.8	883	34.1067	0.684554	95	2.71372	852.17	664	733
Sample1032	59.01	26.12	Europe	Estonia:Liigvalla	forest: temperate broadleaf forest biome	Continental	5.19583	8.15833	35.1466	0.8907	14	43.5	6	1382	33.2583	0.506889	97	2.60392	845.763	656	736
Sample1033	59.01	26.12	Europe	Estonia:Liigvalla	forest: temperate broadleaf forest biome	Continental	5.19583	8.15833	35.1466	0.8907	14	43.5	6	1382	33.2583	0.506889	97	2.60392	845.763	656	736
Sample1034	58.95	26.38	Europe	Estonia:Salla m?sapark	anthropogenic: village biome	Continental	5.00417	8.10833	35.2813	0.8964	10	49.3	6	936	33.9319	1.14743	107	2.7085	848.275	642	722
Sample1035	57.73	26.92	Europe	Estonia:R?ge park	anthropogenic: village biome	Continental	5.3125	7.74167	30.7167	0.9075	17	50.2				0.76735	139	2.86536	845.851	667	734
Sample1036	57.85	26.88	Europe	Estonia:J?gim?	forest: temperate coniferous forest biome	Continental	5.60833	7.83333	31.7856	0.8567	26			991		0.532949	74	2.86536	844.25	641	748
Sample1037	59.31	24.49	Europe	Estonia:Valingu	forest: temperate broadleaf forest biome	Continental	5.77083	6.80833	31.1452	0.8985	51	51.4	6.7	1063	30.3292	0.311548	37	2.60392	809.841	673	748
Sample1038	59.39	24.42	Europe	Estonia:V?na park	anthropogenic: village biome	Continental	5.84583	6.575	32.0065	0.8763	25	60.3	6.2	1138	30.8484	0.347805	27	2.60392	804.901	654	746
Sample1039	59.11	24.78	Europe	Estonia:Lohu	forest: temperate broadleaf forest biome	Continental	5.50833	7.26667	30.0572	0.9781	34	45	6.3	1046	30.5975	0.399428	70	2.60392	799.755	718	734
Sample1040	59.06	24.67	Europe	Estonia:Raka	anthropogenic: village biome	Continental	5.5625	7.15833	29.7106	0.9859	22	43.2	6.1	1071	29.6737	0.161735	67	2.60392	801.561	724	734
Sample1041	59.07	24.7	Europe	Estonia:Raka	forest: temperate broadleaf forest biome	Continental	5.55	7.16667	29.2642	0.9898	22	40.6	6.5	946	40.755	0.126822	66	2.60392	801.978	726	733
Sample1042	49.99	14.55	Europe	Czech Republic:Pruhonice Park	forest: temperate broadleaf forest biome	Continental	8.6875	8.475	46.2215	0.5596	46	29.3	5.5	616		1.24693	320	4.36601	712.974	502	897
Sample1043	50.02	14.53	Europe	Czech Republic:Praha:Botic-Milicov Park	forest: temperate broadleaf forest biome	Continental	9.04167	8.5	48.2667	0.5458	52	27	5.8	740		0.160851	303	4.21438	717.698	502	919
Sample1044	58.04	25.01	Europe	Estonia:J?rja	forest: temperate broadleaf forest biome	Continental	4.55833	7.13333	32.5788	1.0568	16	52.2	6	943	40.6467	0.182323	70	2.80261	868.991	691	653
Sample1045	58.03	24.96	Europe	Estonia:Sookuninga	forest: temperate coniferous forest biome	Continental	4.62083	7.075	33.2149	1.0528	13	54.8	5.2	1663	30.3726	0.174178	78	2.75555	864.819	691	656
Sample1046	57.85	24.71	Europe	Latvia:Staicele	forest: temperate broadleaf forest biome	Continental	5.09167	6.98333	33.6796	0.9992	16	49.9	5.5	1215	30.4109	0.154817	49	2.8549	843.515	674	674
Sample1047	57.86	24.54	Europe	Latvia:Mernieci	forest: temperate broadleaf forest biome	Continental	5.37083	6.94167	33.9841	0.9567	16	61.4	5.1	1104	29.5779	0.165987	40	2.8549	829.04	660	689
Sample1048	58.36	26.89	Europe	Estonia:Luunja park	anthropogenic: village biome	Continental	5.34583	8.09167	35.4674	0.8346	18	50.4	6.3	1200	29.2508	0.411642	45	2.76078	855.106	610	730
Sample1049	58.56	25.85	Europe	Estonia:J?atvere park	anthropogenic: village biome	Continental	5.46667	8.35	32.1568	0.8827	21	42	6.2	959	32.4003	0.344551	57	2.71372	847.285	652	738
Sample1050	58.66	25.97	Europe	Estonia:P?tsamaa m?sapark	anthropogenic: urban biome	Continental	5.39167	8.35	32.5857	0.8868	34	43.6	6.1	931		0.128632	67	2.71372	851.741	657	740
Sample1051	59.55	24.81	Europe	Estonia:Leppneeme	forest: temperate coniferous forest biome	Continental	5.5375	6.29167	30.887	0.902	11	60.2	4.7	1621	27.9814	0.670393	17	2.56209	773.514	642	711
Sample1052	59.44	24.52	Europe	Estonia:Rannam?sa	forest: temperate broadleaf forest biome	Continental	5.74583	6.45833	31.2483	0.8894					27.2129	1.05951	31	2.60392	792.575	652	733
Sample1053	59.44	24.5	Europe	Estonia:Rannam?sa	forest: temperate coniferous forest biome	Continental	5.7375	6.40833	30.9835	0.8922		56.7	5.7		29.8425	0.744468	35	2.60392	790.814	653	731
Sample1054	59.42	24.33	Europe	Estonia:T?isalu	forest: temperate broadleaf forest biome	Continental	5.97083	6.14167	32.6816	0.8525	22	57.2	5.2	1348	24.7128	1.18678	13	2.60392	794.291	636	746
Sample1055	59.4	24.26	Europe	Estonia:Merem?sa	forest: temperate broadleaf forest biome	Continental	6.0625	5.90833	33.1365	0.8432					28.4358	1.02564	37	2.60392	792.969	637	755
Sample1056	59.41	24.8	Europe	Estonia:Peetri	forest: temperate broadleaf forest biome	Continental	5.60833	6.83333	30.1888	0.9305	60	55.7	5	1019		0	41	2.60392	788.271	677	727
Sample1057	59.44	24.64	Europe	Estonia:Vaba?umuuseum	forest: temperate broadleaf forest biome	Continental	5.9125	6.54167	31.5422	0.871						0.749216	1	2.60392	791.01	653	749
Sample1058	57.84	27.2	Europe	Estonia:Lasva puisniit	woodland: woodland: temperate woodland biome	Continental	5.4125	7.85833	32.1679	0.853	30	45.4	5.6	1237	36.5892	0.128087	98	2.86013	859.398	638	747
Sample1059	57.95	27.12	Europe	Estonia:Per??a	forest: temperate coniferous forest biome	Continental	5.41667	7.85	33.298	0.8502	17	53	5.5	1022	31.7267	0.128156	85	2.86013	859.271	632	745
Sample1060	58.08	26.01	Europe	Estonia:Liutsepa	forest: temperate broadleaf forest biome	Continental	5.44167	8.16667	30.1913	0.9031	25	53.9	6	1289	32.7842	0.372047	57	2.76078	838.103	658	728
Sample1061	58.18	25.66	Europe	Estonia:Tuhalaane	anthropogenic: village biome	Continental	5.11667	7.83333	30.5301	0.9346	18	55.2	6.2	920	40.5667	0.492194	107	2.7817	849.787	666	712
Sample1062	58.03	26.92	Europe	Estonia:Tilleorg ristim?d	forest: temperate broadleaf forest biome	Continental	5.3375	7.85833	33.2578	0.8583	26	55.6	5.6	1091		0.893018	118	2.76078	849.471	635	739
Sample1063	58.25	26.69	Europe	Estonia:Paali	forest: temperate broadleaf forest biome	Continental	5.29583	7.975	33.942	0.8538	21	49.2	5.9	1078	29.1065	1.0008	60	2.76078	844.779	621	727
Sample1064	59.25	25.68	Europe	Estonia:J?eda park	anthropogenic: village biome	Continental	5.125	7.86667	32.364	0.9383	25	62.5	6.3	971	28.7771	0.304283	89	2.60392	832.509	682	726
Sample1065	59.25	25.64	Europe	Estonia:Uueveski	forest: temperate coniferous forest biome	Continental	5.125	7.83333	32.7385	0.9345	18	60.4	5.1	1191	29.6231	0.34506	90	2.60392	826.475	680	727
Sample1066	59.32	25.43	Europe	Estonia:Aruoja	forest: temperate broadleaf forest biome	Continental	5.2125	7.55833	31.5026	0.9519	22	72.7	4.7	1192	30.8167	0.182944	61	2.60392	817.777	688	722
Sample1067	59.32	25.43	Europe	Estonia:Tallinn:Mustam?	forest: temperate broadleaf forest biome	Continental	5.2125	7.55833	31.5026	0.9519	22	72.7	4.7	1192	30.8167	0.182944	61	2.60392	817.777	688	722
Sample1068	59.22	24.97	Europe	Estonia:Tuhala	forest: temperate broadleaf forest biome	Continental	5.44167	7.3	30.167	0.9633	26	56.6	6.1	940	29.2096	0.182893	56	2.60392	793.032	699	725
Sample1069	59.21	24.93	Europe	Estonia:Tammiku	forest: temperate broadleaf forest biome	Continental	5.45	7.21667	30.5759	0.9703	26	59.8	5.7	1272	29.6578	0.142772	68	2.60392	789.845	703	724
Sample1070	59.29	24.91	Europe	Estonia:Patika	forest: temperate broadleaf forest biome	Continental	5.42083	7.34167	30.3781	0.9569	26	42.2	5.9	1103	30.8408	0.34541	51	2.60392	793.194	694	725
Sample1071	58.71	26.44	Europe	Estonia:Mustallika	forest: temperate broadleaf forest biome	Continental	5.1625	8.15833	34.2798	0.8766	47	46.1	6	1003	34.7833	0.833282	89	2.7085	848.025	637	726
Sample1072	58.95	26.37	Europe	Estonia:Emum?i	woodland: woodland: temperate woodland biome	Continental	4.94583	8.075	35.0906	0.9087	10	47.7	5.8	1455		2.45107	123	2.7085	846.529	647	720
Sample1073	58.75	26.63	Europe	Estonia:Teilma	forest: temperate broadleaf forest biome	Continental	4.97917	8.175	34.9071	0.8697	22	46.9	5.5	1248	37.6658	0.170083	96	2.70327	852.108	625	718
Sample1074	58.22	26.93	Europe	Estonia:Lootvina	grassland: flooded grassland biome	Continental	5.2375	7.99167	34.2905	0.849	26	55.3	5.8	1156	37.4158	0.159867	86	2.76078	851.475	618	727
Sample1075	58.22	26.93	Europe	Estonia:Alak??40		Continental	5.2375	7.99167	34.2905	0.849	26	55.3	5.8	1156	37.4158	0.159867	86	2.76078	851.475	618	727
Sample1076	59.36	24.15	Europe	Estonia:Leetse	forest: temperate broadleaf forest biome	Continental	6.39167	5.88333	34.0342	0.8036		58.8	5.3	1341		1.07216	20	2.60392	802.498	626	778
Sample1077	59.35	24.14	Europe	Estonia:Paldiski	anthropogenic: rangeland biome	Continental	6.34167	5.95	33.4152	0.8187	18	65.3	5.6	1108	31.6881	0.455765	23	2.60392	805.122	638	779
Sample1078	59.08	24.13	Europe	Estonia:Lepaste	forest: temperate broadleaf forest biome	Continental	5.975	6.86667	33.3262	0.8833	12	61	5.5	1077	29.7767	0.10365	52	2.60392	810.144	673	761
Sample1079	59.08	24.27	Europe	Estonia:Madila	woodland: woodland: temperate woodland biome	Continental	5.94167	6.91667	32.2303	0.8947	43	52.7	5.9	961	26.3854	0.465956	49	2.60392	812.686	683	763
Sample1080	59.22	24.14	Europe	Estonia:Padise	forest: temperate coniferous forest biome	Continental	6.25417	6.525	33.473	0.8343	26	55.7	6.1	1032	28.5051	0.38102	26	2.60392	819.278	651	780
Sample1081	59.18	24.27	Europe	Estonia:Munalaskme	forest: temperate broadleaf forest biome	Continental	6.02917	6.65833	32.6649	0.8852	22	55	6	1491	29.6629	0.295937	32	2.60392	810.688	674	761
Sample1082	59.21	23.93	Europe	Estonia:Hatu	woodland: woodland: temperate woodland biome	Continental	6.2875	6.625	35.2159	0.8297	21	56.6	6	1049	35.0342	0.063607	14	2.59869	815.473	646	778
Sample1083	59.19	23.83	Europe	Estonia:T?avj?ve	forest: temperate coniferous forest biome	Continental	6.15417	6.89167	35.4008	0.8395	16	55.1	6.2	906	20.7613	0.0579682	21	2.59869	816.716	645	768
Sample1084	58.77	25.79	Europe	Estonia:Jalametsa	forest: temperate broadleaf forest biome	Continental	5.39583	8.25833	32.6261	0.8897	22	48.5	6.1	1586	33.4008	0.230966	81	2.71372	844.575	661	742
Sample1085	58.74	25.8	Europe	Estonia:Imavere	anthropogenic: village biome	Continental	5.3875	8.325	32.535	0.9009	17	38	6.6	924	24.9887	0.103344	71	2.71372	848.06	666	739
Sample1086	59.08	26.76	Europe	Estonia:K?ve	forest: temperate coniferous forest biome	Continental	4.84583	7.94167	36.6975	0.8661	10	49.1	5	1602	34.2559	0.112828	88	2.60392	845.099	615	710
Sample1087	59.11	26.76	Europe	Estonia:Tudusoo	forest: temperate coniferous forest biome	Continental	4.86667	7.91667	36.8514	0.8628	18	47.3	6.1	1335	33.2725	0.0634632	85	2.60392	847.057	615	712
Sample1088	59.15	26.83	Europe	Estonia:Suigu	forest: temperate broadleaf forest biome	Continental	4.80833	7.9	36.9814	0.8617	30	51.5	5.3	1352	35.2922	0	78	2.60392	850.237	613	711
Sample1089	58.51	26.48	Europe	Estonia:K?ara	forest: temperate coniferous forest biome	Continental	5.32083	8.025	34.0624	0.8662	14	48.5	5.7	1681	32.7647	0.114688	68	2.7085	834.077	630	727
Sample1090	58.53	26.36	Europe	Estonia:Sinik?a	forest: temperate broadleaf forest biome	Continental	5.40833	8.03333	33.4539	0.8687	19	51.7	5.6	1660	32.5992	0.412666	65	2.7085	836.369	637	733
Sample1091	58.38	26.73	Europe	Estonia:Tartu Fortuuna	anthropogenic: urban biome	Continental	5.6125	8.19167	34.9101	0.8206	56					0.347805	40	2.76078	858.789	618	753
Sample1092	57.73	27.06	Europe	Estonia:V?lam?i	forest: temperate broadleaf forest biome	Continental	4.72083	7.29167	31.1068	0.9612	26	52.8	5.2	1151		1.47683	258	2.86013	834.24	685	712
Sample1093	57.72	27.06	Europe	Estonia:Suur-Munam?i	forest: temperate coniferous forest biome	Continental	4.67083	7.29167	30.5685	0.965	26	54.5	5.5	1173	35.969	1.20006	270	2.86013	834.387	686	710
Sample1094	57.54	26.94	Europe	Latvia:Delinkane	forest: temperate coniferous forest biome	Continental	4.9375	7.40833	28.4794	0.9719	16	51.9	5.5	944		1.26423	202	2.86536	839.448	695	715
Sample1095	57.53	26.87	Europe	Latvia:Jaunlaicene	anthropogenic: village biome	Continental	5.08333	7.51667	29.0049	0.9588	16	51.6	5.2	1113		0.329063	179	2.86536	837.028	690	719
Sample1096	57.73	26.92	Europe	Estonia:R?ge	forest: temperate coniferous forest biome	Continental	5.3125	7.74167	30.7167	0.9075	17	50.2				0.76735	139	2.86536	845.851	667	734
Sample1097	58.25	26.78	Europe	Estonia:Vana-Kuuste	anthropogenic: village biome	Continental	5.325	8.03333	34.5975	0.8349	34	51.6	6.1	910	34.8191	1.41311	56	2.76078	851.276	611	731
Sample1098	58.39	26.89	Europe	Estonia:Savikoja	anthropogenic: urban biome	Continental	5.29167	8.1	35.134	0.8324	26	49.2	6.4	1114	31.5099	0.256898	56	2.76078	856.809	608	730
Sample1099	58.36	25.59	Europe	Estonia:Viljandi Lossipark	anthropogenic: urban biome	Continental	5.40417	8.05833	31.1229	0.884	52	49.1				0.953377	89	2.7817	857.8	649	734
Sample1100	58.36	25.59	Europe	Estonia:Viljandi Lossipark	anthropogenic: urban biome	Continental	5.40417	8.05833	31.1229	0.884	52	49.1				0.953377	89	2.7817	857.8	649	734
Sample1101	58.37	26.63	Europe	Estonia:Viljandi Valuoja park	anthropogenic: urban biome	Continental	5.3625	8.14167	34.4601	0.8411	35	50.9	6.2	916	38.83	0.337442	54	2.76078	851.248	617	733
Sample1102	58.37	25.59	Europe	Estonia:Viljandi Valuoja park	anthropogenic: urban biome	Continental	5.39167	8.08333	31.2191	0.88	52					0.0552728	90	2.7817	858.696	649	737
Sample1103	58.47	25.44	Europe	Estonia:Kobruvere	anthropogenic: village biome	Continental	5.26667	7.98333	31.6069	0.92	21	45.4	6	1218	31.435	0.639394	78	2.80261	851.713	668	726
Sample1104	58.4	25.6	Europe	Estonia:Karula j?v	woodland: woodland: temperate woodland biome	Continental	5.35833	8.08333	30.8678	0.8826	33		6.2	1325	33.9909	0.571796	89	2.7817	855.099	647	733
Sample1105	59.22	25.04	Europe	Estonia:Saula	forest: temperate broadleaf forest biome	Continental	5.4	7.38333	30.1601	0.9613	18	53	6	1425	29.2175	0.12724	54	2.60392	802.417	697	724
Sample1106	59.4	25.9	Europe	Estonia:K?nu	anthropogenic: village biome	Continental	5.0125	7.70833	32.9928	0.9295	14	49.7	5	1327	29.5242	0.311401	102	2.60392	824.602	671	721
Sample1107	59.48	25.91	Europe	Estonia:Loobu	forest: temperate broadleaf forest biome	Continental	5.1125	7.69167	32.6173	0.9123	18	57.5	4.6	1551	28.786	0.346623	70	2.60392	824.533	661	724
Sample1108	59.58	25.95	Europe	Estonia:V?u	forest: temperate coniferous forest biome	Continental									15.9721	0.907901	18	2.56209
Sample1109	59.58	25.63	Europe	Estonia:Hara	forest: temperate coniferous forest biome	Continental									14.1708	1.43817	9	2.56209
Sample1110	59.58	25.63	Europe	Estonia:Hara	forest: temperate coniferous forest biome	Continental									14.1708	1.43817	9	2.56209
Sample1111	59.42	24.66	Europe	Estonia:Tallinn Zoo	anthropogenic: urban biome	Continental	5.94583	6.70833	30.889	0.879	52			1161		0.365995	17	2.60392	796	664	755
Sample1112	59.44	24.53	Europe	Estonia:Rannam?sa pank	forest: temperate broadleaf forest biome	Continental	5.725	6.5	31.6541	0.8923					26.7356	1.36393	27	2.60392	791.174	654	732
Sample1113	59.44	24.79	Europe	Estonia:Kadriorg Russalka	anthropogenic: urban biome	Continental	5.88333	6.81667	30.6234	0.8925						1.68631	21	2.60392	791.49	669	749
Sample1114	59.07	24.76	Europe	Estonia:M?saaseme	woodland: woodland: temperate woodland biome	Continental	5.51667	7.28333	29.2328	0.9943	22	45.6	6.8	853	34.8423	0.310922	72	2.60392	802.531	728	732
Sample1115	59.06	24.76	Europe	Estonia:M?saaseme	woodland: woodland: temperate woodland biome	Continental	5.52083	7.275	29.1426	0.9947	14	44.9	6.7	903	34.1042	0.0808675	69	2.60392	803.751	729	732
Sample1116	59.03	24.95	Europe	Estonia:Ingliste	forest: temperate broadleaf forest biome	Continental	5.41667	7.5	30.0412	0.9922	14	48.6	6.6	1291	32.7923	0	73	2.60392	812.67	723	728
Sample1117	59.37	24.78	Europe	Estonia:Raudalu	woodland: woodland: temperate woodland biome	Continental	5.6125	6.79167	30.6061	0.9304	35	54.5	5.1	1134	28.9439	0.304859	40	2.60392	782.264	677	727
Sample1118	59.47	24.88	Europe	Estonia:Tallinn Botanical Gardens	anthropogenic: urban biome	Continental	5.65417	6.825	31.1568	0.9031	38	53.1	5.5	1242	28.745	0.694324	23	2.60392	795.26	664	735
Sample1119	59.47	24.88	Europe	Estonia:Tallinn Botanical Gardens	forest: temperate broadleaf forest biome	Continental	5.65417	6.825	31.1568	0.9031	38	53.1	5.5	1242	28.745	0.694324	23	2.60392	795.26	664	735
Sample1120	58.02	26.93	Europe	Estonia:Puskaru Tilleorg	forest: temperate coniferous forest biome	Continental	5.375	7.86667	33.1605	0.85	14	61.4	5.4	1140		0.662534	98	2.76078	852.036	631	742
Sample1121	58.25	22.04	Europe	Estonia:Kipi	woodland: woodland: temperate woodland biome	Continental	6.92083	5.09167	32.4321	0.7534	17	58.8	5.6	1462	33.3994	0.222212	10	2.7085	739.974	582	772
Sample1122	58.26	22.03	Europe	Estonia:Varpe	woodland: woodland: temperate woodland biome	Continental	6.89167	5.2	31.8178	0.754	25	54.4	5.9	1162	31.2967	0.360923	7	2.7085	740.752	585	775
Sample1123	58.26	21.91	Europe	Estonia:Karala	forest: temperate broadleaf forest biome	Continental	6.9	5	32.2456	0.7557	13	59.4	5.9	1117	31.2028	0.284746	7	2.70327	734.757	579	766
Sample1124	58.25	22.01	Europe	Estonia:Pussa	forest: temperate broadleaf forest biome	Continental	6.94583	5.025	31.6034	0.7516	17	55.1	5.7	1226	28.5132	0.263704	2	2.7085	740.143	581	772
Sample1125	59.62	24.99	Europe	Estonia:Prangli Rivimaa	forest: temperate broadleaf forest biome	Continental						62.3	5.7	1245		0	1	2.56209
Sample1126	59.62	24.99	Europe	Estonia:Prangli Rivimaa	forest: temperate broadleaf forest biome	Continental						62.3	5.7	1245		0	1	2.56209
Sample1127	59.62	25	Europe	Estonia:Prangli Rivimaa	forest: temperate broadleaf forest biome	Continental	5.72917	6.20833	30.7653	0.8716		59.5	5.5	1500	31.1146	0.192659	1	2.56209	758.004	636	729
Sample1128	59.63	25	Europe	Estonia:Prangli Kelnase	forest: temperate coniferous forest biome	Continental	5.69583	6.175	30.9443	0.8762		61.9	5.2		25.5315	0.501444	3	2.56209	758.897	637	726
Sample1129	59.41	24.8	Europe	Estonia:?emiste	forest: temperate broadleaf forest biome	Continental	5.60833	6.83333	30.1888	0.9305	60	55.7	5	1019		0	41	2.60392	788.271	677	727
Sample1130	58.37	26.81	Europe	Estonia:P?vatu	anthropogenic: village biome	Continental	5.325	8.15	34.8135	0.8446	42	52.3	6.4	1254	35.3844	0.524619	56	2.76078	852.799	617	730
Sample1131	57.81	27.05	Europe	Estonia:Verij?ve	forest: temperate coniferous forest biome	Continental	5.52083	7.775	31.7768	0.8613	39	51.2			28.1888	1.37471	125	2.86013	847.961	646	749
Sample1132	57.79	27.17	Europe	Estonia:Tammes?r	forest: temperate broadleaf forest biome	Continental	5.10417	7.55833	31.4367	0.8948	22	55.4	5.2	858		0.719898	185	2.86013	843.495	656	733
Sample1133	57.8	27.16	Europe	Estonia:K?iorg	forest: temperate coniferous forest biome	Continental	5.1875	7.625	31.8462	0.8766	22	50.6	5.7	845		2.12141	160	2.86013	846.184	649	740
Sample1134	58.37	26.8	Europe	Estonia:Lohkva	grassland: temperate grassland biome	Continental	5.32917	8.14167	34.8135	0.8447	42	50.9	6.5	801		0.575101	59	2.76078	853.1	617	730
Sample1135	58.32	25.9	Europe	Estonia:Riuma	anthropogenic: village biome	Continental	5.54167	7.93333	30.5033	0.8748	14	52.2	6.4	866	36.7367	0.155073	38	2.7817	846.737	644	736
Sample1136	58.3	25.82	Europe	Estonia:M?naste	anthropogenic: village biome	Continental	5.41667	8.11667	30.977	0.8838	26	46	6.4	993	35.515	0.124626	56	2.7817	847.063	646	730
Sample1137	58.23	25.9	Europe	Estonia:Tarvastu	anthropogenic: village biome	Continental	5.44167	8.21667	30.6085	0.8838	26	51.4	6.3	1019	38.0058	0.466991	58	2.7817	850.192	649	734
Sample1138	58.25	25.69	Europe	Estonia:Kivik?a	forest: temperate broadleaf forest biome	Continental	5.2	7.93333	30.6763	0.9104	26	51.3	6.1	839	39.0392	0.438228	94	2.7817	849.305	653	717
Sample1139	58.28	25.58	Europe	Estonia:Loodi	forest: temperate broadleaf forest biome	Continental	5.25	7.88333	31.2329	0.904	26	51.8	6.2	699	32.7819	0.677262	63	2.7817	851.867	650	719
Sample1140	58.34	25.46	Europe	Estonia:Marna	forest: temperate broadleaf forest biome	Continental	5.2375	7.85833	31.4315	0.9219	18	48.8	6.1	935	33.3056	1.93954	61	2.80261	859.302	660	715
Sample1141	58.64	26.7	Europe	Estonia:K?enduse	forest: temperate broadleaf forest biome	Continental	5.05417	8.175	34.6976	0.8654	22	50	6.3	1205	32.2696	0.753375	87	2.70327	855.608	624	720
Sample1142	58.74	26.65	Europe	Estonia:Imukvere	forest: temperate broadleaf forest biome	Continental	5.01667	8.15	34.8032	0.8641	14	44.4	5.7	957	31.8819	0.115936	91	2.70327	852.913	623	720
Sample1143	58.77	26.57	Europe	Estonia:Kivij?ve	anthropogenic: village biome	Continental	5.02917	8.09167	34.9642	0.8754	22	46.3	6.4	1124	32.3864	0.365327	91	2.70327	845.083	630	719
Sample1144	58.99	26.32	Europe	Estonia:Tammiku	forest: temperate broadleaf forest biome	Continental	5.00833	8.1	35.5662	0.8919	10	50.7	6.3	1203	32.4275	1.13118	112	2.7085	845.482	646	724
Sample1145	58.98	26.26	Europe	Estonia:Rakke	forest: temperate broadleaf forest biome	Continental	5.075	8.13333	35.7531	0.894	47	42.3	6	1086	30.1237	0.207124	104	2.7085	847.24	651	728
Sample1146	58.98	26.05	Europe	Estonia:Koeru	forest: temperate coniferous forest biome	Continental	5.15	8.18333	34.9453	0.9014	26	48.4	6.2	923		0.379685	102	2.7085	847.601	663	735
Sample1147	58.36	26.64	Europe	Estonia:M?ja	anthropogenic: village biome	Continental	5.3625	8.125	34.6376	0.847	39	50.8	6.2	963	36.5783	0.403806	56	2.76078	851.248	620	731
Sample1148	57.72	27.05	Europe	Estonia:Haanja	forest: temperate broadleaf forest biome	Continental	4.75	7.3	30.5473	0.9616	26	53.6	5.5	1134	33.5183	0.855645	264	2.86013	834.789	685	712
Sample1149	59.22	27.33	Europe	Estonia:M?taguse	forest: temperate broadleaf forest biome	Continental	4.54583	8.10833	38.211	0.8958	14	52.5	5.7	1059	34.8379	0.116918	65	2.60392	889.301	635	708
Sample1150	59.22	27.35	Europe	Estonia:Uhe	forest: temperate broadleaf forest biome	Continental	4.5625	7.99167	38.4824	0.8889	14	54.4	5.8	1099	33.2408	0.0566343	68	2.60392	887.064	633	712
Sample1151	59.26	27.58	Europe	Estonia:Kurtna	forest: temperate coniferous forest biome	Continental	4.7125	7.64167	37.0053	0.8719	18	58.4	5	1791		0.398007	59	2.60392	886.087	628	720
Sample1152	59.27	27.51	Europe	Estonia:Kurtna park	anthropogenic: village biome	Continental	4.60833	7.85	36.9558	0.8866	30	55.5	6.3	1174	33.1493	0.306393	60	2.60392	886.586	633	713
Sample1168	58.63	23.43	Europe	Estonia:Kesselaid	forest: temperate broadleaf forest biome	Continental	7.7125	5.19167	34.1641	0.666	8	50.2	5.2	1754		0.364154	13	2.65621	737.111	578	867
Sample1169	58.73	23.97	Europe	Estonia:Kirbla	anthropogenic: village biome	Continental	6.1	7.6	33.5248	0.8409	20	50.1	6.7	828	35.2301	0.286047	9	2.65621	819.179	641	762
Sample1170	58.56	23.55	Europe	Estonia:Lihula	anthropogenic: village biome	Continental	6.6125	6.19167	32.0313	0.7577	20	55.8	5.6	1206		0.0555671	10	2.65621	815.339	589	777
Sample1171	59	23.25	Europe	Estonia:Hullo	forest: temperate broadleaf forest biome	Continental	6.2625	5.89167	35.7885	0.8062	12	66.5	5.6	1426	30.629	0.0579682	21	2.65621	778.959	595	737
Sample1172	58.99	23.19	Europe	Estonia:Suurem?sa park	anthropogenic: village biome	Continental	6.4125	5.69167	35.5233	0.7946	12	67.6	6.3	1147	32.3469	0.225072	9	2.65621	769.617	592	744
Sample1173	59.01	23.2	Europe	Estonia:F?larna	forest: temperate broadleaf forest biome	Continental	6.4125	5.60833	35.7185	0.7933	15	66.4	5.7	1735	29.7344	0.403554	22	2.58823	765.866	594	748
Sample1174	59.02	23.2	Europe	Estonia:Borrby	forest: temperate coniferous forest biome	Continental	6.425	5.51667	35.7185	0.7945	15	67	5.5	1768	26.8312	0.447481	20	2.58823	763.677	594	747
Sample1175	58.67	23.7	Europe	Estonia:Petaaluse	woodland: woodland: temperate woodland biome	Continental	6.30833	7.03333	33.844	0.7921	28	64.7	6.1	1184	36.8262	0.176973	25	2.65621	811.11	609	768
Sample1176	58.74	23.67	Europe	Estonia:Keemu	forest: temperate broadleaf forest biome	Continental	6.31667	7.03333	33.8467	0.7998		64.6	6.3	985	33.5104	0.620457	6	2.65621	814.062	610	762
Sample1177	58.24	24.61	Europe	Estonia:Maarjapeakse	forest: temperate broadleaf forest biome	Continental	5.66667	6.65	31.8454	0.9572	22	65.1	5.6	1166	34.4069	0.140318	17	2.75555	825.286	675	705
Sample1178	58.03	24.66	Europe	Estonia:Urissaare	forest: temperate broadleaf forest biome	Continental	5.12083	6.875	31.9781	1.0017	16	52.8	5.7	1209	32.4652	0.717	75	2.75555	837.305	680	678
Sample1179	58.02	24.64	Europe	Estonia:Urissaare	forest: temperate broadleaf forest biome	Continental	5.22917	6.84167	32.9161	0.9914	16	54.3	6.1	853	36.3392	0.712122	59	2.75555	834.973	675	680
Sample1180	58.16	26.23	Europe	Estonia:R?gu Lossim?	forest: temperate broadleaf forest biome	Continental	5.35417	8.225	30.6978	0.8899	26	43.7	5.8	1063		0.352117	74	2.76078	839.666	651	731
Sample1181	58.15	26.25	Europe	Estonia:R?gu	forest: temperate coniferous forest biome	Continental	5.30417	8.25833	30.8236	0.8939	26	45.1	6.2	905	34.1417	0.750717	86	2.76078	839.083	651	728
Sample1182	58.2	26.31	Europe	Estonia:Tammiste	anthropogenic: village biome	Continental	5.29583	8.225	31.7483	0.8864	14	48	5.6	1207	41.277	0.500898	83	2.76078	840.469	646	727
Sample1183	58.14	26.36	Europe	Estonia:Urmi	grassland: temperate grassland biome	Continental	5.27917	8.19167	31.9683	0.8942	22	49.9	5.5	981	36.6926	0.174642	96	2.76078	836.004	649	725
Sample1184	58.05	25.4	Europe	Estonia:Penuja	anthropogenic: village biome	Continental	4.86667	7.55	31.8988	0.9867	22	54.6	6.2	878	33.0488	0.400576	87	2.80261	876.678	682	691
Sample1185	58.05	25.39	Europe	Estonia:Penuja	anthropogenic: village biome	Continental	4.89167	7.55	31.8765	0.9912	22	53.7	6	805	34.5992	0.298614	78	2.80261	878.899	686	692
Sample1186	58.14	25.26	Europe	Estonia:L?tre	forest: temperate broadleaf forest biome	Continental	4.82917	7.45833	32.5065	0.9942	12	52.5	5.8	931	36.7692	0.260855	62	2.80261	876.116	682	685
Sample1187	58.13	25.27	Europe	Estonia:Killi	forest: temperate broadleaf forest biome	Continental	4.7875	7.475	32.5982	1	26	53.6	5.5	1145	33.854	0.205666	65	2.80261	875.765	683	682
Sample1188	57.76	26.19	Europe	Estonia:Niklusem?i	forest: temperate coniferous forest biome	Continental	5.42917	8.275	30.2875	0.9041	22	52.7	5.8	1477	36.578	0.278338	69	2.87059	825.237	657	726
Sample1189	57.75	26.22	Europe	Estonia:Pugritsa	anthropogenic: village biome	Continental	5.38333	8.25	30.6114	0.8996	17	53.9	5.8	1179		0.218073	83	2.87059	826.871	654	726
Sample1190	57.6	26.35	Europe	Estonia:Karjam?sa	forest: temperate broadleaf forest biome	Continental	5.59167	8.15	33.3502	0.8657	9	46.5	5.7	1524		0.329686	56	2.87059	825.634	638	736
Sample1191	57.59	26.32	Europe	Estonia:Tsirgum?	forest: temperate broadleaf forest biome	Continental	5.57917	8.20833	33.4985	0.8691	17	48.8	5.9	1457	32.7164	0.613476	55	2.87059	825.049	638	734
Sample1192	57.59	26.32	Europe	Estonia:Karjam?sa	woodland: woodland: temperate woodland biome	Continental	5.57917	8.20833	33.4985	0.8691	17	48.8	5.9	1457	32.7164	0.613476	55	2.87059	825.049	638	734
Sample1193	58.3	26.59	Europe	Estonia:J?iste	forest: temperate coniferous forest biome	Continental	5.3375	8.09167	34.1003	0.8569	34	53.5	6.4	970	30.0042	0.552361	70	2.76078	845.464	626	730
Sample1194	58.35	26.66	Europe	Estonia:R?i	forest: temperate coniferous forest biome	Continental	5.3	8.1	34.3913	0.8504	44	50	6.3	718	33.1071	0.110462	69	2.76078	849.551	622	731
Sample1195	59.31	26.46	Europe	Estonia:M?riku	forest: temperate broadleaf forest biome	Continental	5.14583	7.775	35.5683	0.8402	36	46.9	6.3	1037	32.0175	0.365875	94	2.60392	840.02	621	739
Sample1196	59.32	26.58	Europe	Estonia:Aasuv?ja	forest: temperate broadleaf forest biome	Continental	5.0375	7.675	35.8796	0.8404	26	48.2	5.9	1101	37.1613	0.793162	85	2.60392	841.73	614	730
Sample1197	59.31	26.14	Europe	Estonia:Neeruti	forest: temperate broadleaf forest biome	Continental	5.075	7.91667	34.6575	0.8838	18	47.1	6.1	1347	34.4888	0.800648	113	2.60392	838.471	649	734
Sample1198	59.26	26.23	Europe	Estonia:Lasila	forest: temperate broadleaf forest biome	Continental	4.9625	7.94167	35.4778	0.89	26	44.3	6.2	1093	27.32	0.88664	127	2.60392	840.141	650	730
Sample1199	59.28	26.25	Europe	Estonia:J?ni	woodland: woodland: temperate woodland biome	Continental	4.97917	7.90833	35.0884	0.8874	14	46	6.7	1061	34.9979	0.129075	124	2.60392	841.726	650	732
Sample1200	59.05	26.23	Europe	Estonia:?tu	forest: temperate coniferous forest biome	Continental	5.12917	8.09167	36.2463	0.8857	26	46.6	6.2	1242	34.1856	0.584155	100	2.60392	843.43	649	732
Sample1201	58.24	26.68	Europe	Estonia:Virulase	forest: temperate coniferous forest biome	Continental	5.24583	7.94167	34.2375	0.8601	21	52.4	6.4	1009	32.7181	1.0203	84	2.76078	842.333	624	725
Sample1202	58.38	26.56	Europe	Estonia:R?u	forest: temperate broadleaf forest biome	Continental	5.4	8.08333	34.1314	0.8515	22	48.4	6.6	874	34.6894	0.499376	49	2.76078	847.327	625	733
Sample1203	58.53	26.71	Europe	Estonia:Saluk?a	forest: temperate coniferous forest biome	Continental	5.18333	8	34.3061	0.8475	22	50.3	6.4	998	29.3958	0.503061	81	2.70327	856.566	617	728
Sample1204	58.28	25.58	Europe	Estonia:Loodi	forest: temperate coniferous forest biome	Continental	5.25	7.88333	31.2329	0.904	26	51.8	6.2	699	32.7819	0.677262	63	2.7817	851.867	650	719
Sample1205	58.28	25.58	Europe	Estonia:Loodi	forest: temperate coniferous forest biome	Continental	5.25	7.88333	31.2329	0.904	26	51.8	6.2	699	32.7819	0.677262	63	2.7817	851.867	650	719
Sample1206	58.18	25.68	Europe	Estonia:Tuhalaane	anthropogenic: village biome	Continental	5.0875	7.80833	31.1376	0.9376	18	58.1	5.5	1104	39.2417	0.0798959	125	2.7817	846.748	668	712
Sample1207	58.18	25.74	Europe	Estonia:Paluvere	forest: temperate broadleaf forest biome	Continental	5.125	7.9	30.5034	0.9329	22	55.1	5.5	1010	36.9408	1.61076	96	2.7817	844.23	667	714
Sample1208	58.29	25.88	Europe	Estonia:V?uste	forest: temperate broadleaf forest biome	Continental	5.45	8.16667	30.3433	0.8764	22	51.7	6.2	870		0.323556	50	2.7817	849.355	644	734
Sample1209	58.34	25.78	Europe	Estonia:Ruudik?a	anthropogenic: village biome	Continental	5.4375	8.09167	31.111	0.8865	26	49.8	6.2	767	31.5383	0.14492	51	2.7817	846.931	647	729
Sample1210	58.36	25.76	Europe	Estonia:Saarek?a	anthropogenic: village biome	Continental	5.39167	8.15	30.9965	0.8825	26	52.4	6.3	775	33.7171	0.264306	63	2.7817	849.127	646	731
Sample1211	58.98	25.59	Europe	Estonia:Purdi	forest: temperate coniferous forest biome	Continental	5.32083	8.15833	33.0262	0.9291	22	50.5	5.6	1620	32.1958	0.171232	84	2.71372	835.889	688	740
Sample1212	59.27	24.55	Europe	Estonia:Koppelmaa	forest: temperate broadleaf forest biome	Continental	5.71667	6.91667	30.88	0.9191	18	51.7	6.2	834	34.2	0.063699	36	2.60392	798.289	681	740
Sample1213	59.07	24.48	Europe	Estonia:Ubasalu	forest: temperate broadleaf forest biome	Continental	5.74583	6.875	30.6601	0.9516	16	31.6	6.1	1285	30.7975	0.116463	58	2.60392	804.63	709	745
Sample1214	59.01	24.57	Europe	Estonia:Ohekatku	anthropogenic: village biome	Continental	5.68333	6.98333	29.7396	0.9718	11	35.9	6.4	832	32.3206	0.231871	62	2.60392	799.421	716	736
Sample1215	58.96	24.3	Europe	Estonia:Kohatu	woodland: woodland: temperate woodland biome	Continental	5.94583	6.99167	31.9258	0.9068	8	52.9	6	766	25.9096	0.41019	38	2.66667	811.187	687	757
Sample1216	59.28	24.46	Europe	Estonia:Tuula	anthropogenic: village biome	Continental	5.85417	6.84167	30.7162	0.8934	39	39.8	6.2	802	39.0525	0.173904	31	2.60392	810.111	674	754
Sample1217	59.23	24.14	Europe	Estonia:Padise	forest: temperate broadleaf forest biome	Continental	6.27917	6.49167	33.1332	0.8324	17	53.9	5.9	884	28.3363	0.516131	14	2.60392	820.658	651	782
Sample1218	59.31	23.93	Europe	Estonia:Suur-Pakri Suurk?a	anthropogenic: village biome	Continental	6.4375	5.99167	33.8149	0.8029	18	67.1	6.1	1018	36.2187	0.429082	6	2.59869	816.072	629	783
Sample1219	59.34	23.92	Europe	Estonia:Suur-Pakri ?str-nabban	woodland: woodland: temperate woodland biome	Continental										0.229205	1	2.59869
Sample1220	59.33	23.93	Europe	Estonia:Suur-Pakri H?s-h?ani	grassland: flooded grassland biome	Continental	6.5375	5.925	33.8149	0.7944			6.2		23.5927	0.202888	1	2.59869	813.542	629	791
Sample1221	59.38	24.04	Europe	Estonia:Paldiski	anthropogenic: rangeland biome	Continental	6.61667	5.61667	33.6908	0.7729	16	63.2	5.8	1238	28.6638	1.6621	23	2.60392	802.667	621	803
Sample1222	59.26	24.14	Europe	Estonia:Kari	anthropogenic: village biome	Continental	6.29167	6.35	34.1701	0.8302	13	52.4	6.1	1149	30.6075	0.232436	11	2.60392	817.079	646	778
Sample1223	58.93	23.49	Europe	Estonia:Ungru	forest: temperate coniferous forest biome	Continental	6.275	6.5	35.8946	0.7935	33				31.0163	0.705878	10	2.65621	800.726	597	752
Sample1224	58.92	23.55	Europe	Estonia:Valgev?ja	forest: temperate coniferous forest biome	Continental	6.25	6.85	35.8344	0.8049	53	66.1	5.9	1137	30.0107	0.597032	13	2.65621	804.925	615	764
Sample1225	58.78	23.49	Europe	Estonia:Puise	forest: temperate broadleaf forest biome	Continental	6.35833	6.4	34.4412	0.7769	30	62.2	5.7	1301	36.4081	0.514837	6	2.65621	805.78	589	758
Sample1226	58.78	23.55	Europe	Estonia:Kiideva	anthropogenic: village biome	Continental	6.33333	6.76667	33.8747	0.7879	18	61.8	6	936	35.4933	0.202888	6	2.65621	808.898	598	758
Sample1227	58.79	23.53	Europe	Estonia:Koidu	forest: temperate broadleaf forest biome	Continental	6.35	6.63333	34.2344	0.7801	22	66.8	6	1203	35.8448	0.465997	7	2.65621	806.44	593	760
Sample1228	59	23.74	Europe	Estonia:M?	forest: temperate broadleaf forest biome	Continental	6.0125	7.64167	36.0196	0.8492	16	56	6.2	885	30.479	0.232022	19	2.65621	814.179	642	755
Sample1229	59.23	24.01	Europe	Estonia:Harju-Risti	forest: temperate broadleaf forest biome	Continental	6.325	6.56667	34.3492	0.8249	25	54.8	6.6	1026	30.7128	0.350836	17	2.60392	824.785	648	785
Sample1230	59.39	24.3	Europe	Estonia:Keila-Joa	forest: temperate broadleaf forest biome	Continental	5.9625	6.19167	32.305	0.8553	15	60.2	5.6	1576	30.1621	0.232639	37	2.60392	797.836	644	752
Sample1231	59.43	24.55	Europe	Estonia:Tabasalu	forest: temperate broadleaf forest biome	Continental	5.75417	6.59167	30.9389	0.8986	41		4.8	1516		1.1987	35	2.60392	794.399	660	734
Sample1232	59.47	25.28	Europe	Estonia:Haavakannu	woodland: woodland: temperate woodland biome	Continental	5.28333	7.26667	31.2406	0.932	30	58.2	5.9	1288	30.8017	0.206722	41	2.60392	808.532	670	718
Sample1233	59.47	25.3	Europe	Estonia:P?jakivi	woodland: woodland: temperate woodland biome	Continental	5.29167	7.35	31.1568	0.9368	22	55	6.2	1020	32.7375	0.117725	42	2.60392	810.131	674	719
Sample1234	57.91	26.27	Europe	Estonia:Sangaste Lossik?a	forest: temperate coniferous forest biome	Continental	5.35833	8.31667	31.1121	0.8985	15	51.2	6	1025	38.4983	0.399032	61	2.87059	837.759	651	724
Sample1235	57.84	26.41	Europe	Estonia:Tagula	forest: temperate broadleaf forest biome	Continental	5.48333	8.11667	32.143	0.8654	26	54.2	6.1	1075		0.386116	69	2.87059	829.716	636	734
Sample1236	57.86	26.52	Europe	Estonia:Vana-Antsla	anthropogenic: village biome	Continental	5.41667	8.13333	32.1412	0.8714	18	45.1	6	877	35.6946	0.459285	82	2.86536	840.823	640	734
Sample1237	57.92	26.52	Europe	Estonia:L?tsuu	forest: temperate broadleaf forest biome	Continental	5.2375	7.94167	32.1571	0.9051	14	48.3	5.6	920		1.46037	108	2.86536	835.826	651	719
Sample1238	58.75	26.5	Europe	Estonia:V?kvere	forest: temperate broadleaf forest biome	Continental	5.0375	8.025	34.4086	0.8885	26	51.7	5.9	1385	30.7842	1.16174	111	2.70327	846.02	640	720
Sample1239	58.76	26.51	Europe	Estonia:Alavere	anthropogenic: village biome	Continental	5.03333	8.03333	35.0702	0.8807	26	56.3	6.4	1169	35.7276	0.463256	119	2.70327	845.615	635	720
Sample1240	58.55	26.93	Europe	Estonia:Alaj?	forest: temperate coniferous forest biome	Continental	5.12917	7.875	35.7105	0.8501	18	55.3	5.5	1666	34.1909	0.758455	70	2.70327	846.459	611	718
Sample1241	58.44	25.51	Europe	Estonia:Hussari	forest: temperate broadleaf forest biome	Continental	5.1625	7.95833	31.1579	0.9215	19	51	6.2	1062	32.4542	0.262213	112	2.7817	851.221	666	722
Sample1242	58.41	25.29	Europe	Estonia:Lubjassaare	forest: temperate coniferous forest biome	Continental	5.39583	7.55833	32.5641	0.9346	8	51.2	5.8	1524	31.636	0.437216	36	2.80261	845.132	673	720
Sample1243	58.42	25.23	Europe	Estonia:Tuhkja	forest: temperate broadleaf forest biome	Continental	5.40833	7.55	31.8325	0.9449	9	43.7	5.9	1577	31.5742	0.175856	32	2.80261	845.646	680	719
Sample1244	58.48	24.99	Europe	Estonia:Riisa	anthropogenic: village biome	Continental	5.51667	7.28333	31.5756	0.9569	17	38.4	5.8	1571	36.8183	0.238198	25	2.75555	842.983	695	726
Sample1245	58.45	25.06	Europe	Estonia:Karuskose	forest: temperate coniferous forest biome	Continental	5.46667	7.3	31.8334	0.955	8	47.8	5.6	1216	33.4619	0.0869522	33	2.80261	837.771	687	721
Sample1246	58.06	26.34	Europe	Estonia:Meegaste	forest: temperate broadleaf forest biome	Continental	4.9875	7.89167	31.2981	0.9399	14	49.2	5.7	999	33.9435	0.780329	179	2.76078	822.441	669	711
Sample1247	58.02	26.06	Europe	Estonia:Soontaga	forest: temperate coniferous forest biome	Continental	5.44167	8.05	31.0791	0.9098	13	55.3	5.3	1319	27.4496	0.760685	45	2.76078	830.087	660	725
Sample1248	58.14	25.92	Europe	Estonia:Roosilla	forest: temperate broadleaf forest biome	Continental	5.3625	8.19167	30.4879	0.9091	22	51.8	6.4	964	31.1333	0.55596	70	2.7817	842.828	659	724
Sample1249	58.14	25.93	Europe	Estonia:Roosilla	anthropogenic: cropland biome	Continental	5.37083	8.20833	30.355	0.9055	26	52.4	6.1	767		0.0798486	65	2.7817	844.015	658	726
Sample1250	58.11	26.18	Europe	Estonia:V?jaotsa	forest: temperate broadleaf forest biome	Continental	5.35833	8.2	30.843	0.9014	26	51.6	6.1	843		0.401216	68	2.76078	836.257	655	726
Sample1251	58.13	26.18	Europe	Estonia:Koruste	anthropogenic: cropland biome	Continental	5.39583	8.125	30.9428	0.8951	21	54.3	6.2	848		0.239516	64	2.76078	837.704	652	728
Sample1252	58.36	25.42	Europe	Estonia:Puiatu	anthropogenic: village biome	Continental	5.20833	7.86667	31.3041	0.9281	26	46.8	6.3	1226	33.2277	1.02562	61	2.80261	857.34	665	716
Sample1253	58.27	25.18	Europe	Estonia:Riimaru	forest: temperate coniferous forest biome	Continental	5.05417	7.29167	32.6315	0.9831	13	52.2	5.5	1607	35.1498	0.299623	58	2.80261	854.606	683	694
Sample1254	58.3	25.45	Europe	Estonia:Vanausse	anthropogenic: village biome	Continental	5.125	7.75	31.469	0.9392	22	51.5	6.1	894	33.1843	0.379621	87	2.80261	855.444	669	712
Sample1255	58.33	25.51	Europe	Estonia:P?i	forest: temperate coniferous forest biome	Continental	5.27917	7.90833	31.5659	0.9017	32	49.4	5.7	1318	34.1733	1.41325	70	2.7817	858.321	650	720
Sample1256	57.69	27.38	Europe	Estonia:Miikse	forest: temperate coniferous forest biome	Continental	4.9125	7.30833	31.7709	0.9116	14	53.7	5	1267		0.102474	204	2.86013	846.388	660	723
Sample1277	57.56	26.55	Europe	Estonia:Siks??olk	forest: temperate coniferous forest biome	Continental	5.60833	7.95	31.7379	0.8809	26	47.2	5.9	847	31.1847	0.552674	80	2.86536	825.122	654	742
Sample1278	57.56	26.53	Europe	Estonia:Villike	forest: temperate broadleaf forest biome	Continental	5.63333	7.98333	31.8879	0.8789	26	47.4	5.6	868	33.3358	0.434385	71	2.86536	824.925	652	741
Sample1279	57.57	26.53	Europe	Estonia:Tiitsa	anthropogenic: village biome	Continental	5.625	8	31.6887	0.8766	26	47.8	5.7	1110	30.7738	0.344411	73	2.86536	824.62	650	741
Sample1280	58.4	26.74	Europe	Estonia:Vahi	anthropogenic: village biome	Continental	5.52917	8.175	34.6341	0.8195	42	50.8	6.4	958		0.443456	61	2.76078	856.559	615	750
Sample1281	59.27	24.69	Europe	Estonia:Kiisa	woodland: woodland: temperate woodland biome	Continental	5.6	7.08333	29.3237	0.9414	30	49.8	6.2	1073	33.5785	0.063699	44	2.60392	790.814	690	732
Sample1282	59	24.62	Europe	Estonia:Palamulla	forest: temperate coniferous forest biome	Continental	5.65417	7.10833	29.9766	0.9793	22	42.9	6.1	1338	26.4829	0.232022	67	2.70327	802.843	723	738
Sample1283	59	24.65	Europe	Estonia:Lipstu	woodland: woodland: temperate woodland biome	Continental	5.63333	7.13333	29.8414	0.9856	22	32.2	6.2	1088	35.3647	0.513941	57	2.70327	804.341	725	735
Sample1295	57.84	27	Europe	Estonia:V?u	anthropogenic: urban biome	Continental	5.7	7.86667	31.9283	0.844	52					0.295915	74	2.86013	853.647	643	761
Sample1296	58.63	23.43	Europe	Estonia:Kesselaid SW	forest: temperate coniferous forest biome	Continental	7.7125	5.19167	34.1641	0.666	8	50.2	5.2	1754		0.364154	13	2.65621	737.111	578	867
Sample1297	58.63	23.44	Europe	Estonia:Kesselaid NE	woodland: woodland: temperate woodland biome	Continental	7.72917	5.19167	34.0105	0.6676	16					0.670641	12	2.65621	737.469	579	867
Sample1298	58.69	23.59	Europe	Estonia:Salevere Salum?i	forest: temperate broadleaf forest biome	Continental	6.425	6.68333	33.6035	0.7752	16	61.7	5.9	1058	32.2768	0.0628478	19	2.65621	813.747	598	771
Sample1299	58.56	23.55	Europe	Estonia:Puhtu N	forest: temperate broadleaf forest biome	Continental	6.6125	6.19167	32.0313	0.7577	20	55.8	5.6	1206		0.0555671	10	2.65621	815.339	589	777
Sample1300	58.56	23.72	Europe	Estonia:Vatla Park	anthropogenic: village biome	Continental	6.3625	6.95833	32.2623	0.7799	20	60.8	6.1	1140	37.2125	0.321195	11	2.65621	816.345	600	769
Sample1301	58.65	23.66	Europe	Estonia:Voosemetsa	forest: temperate coniferous forest biome	Continental	6.36667	6.88333	33.5249	0.7832	19	65.6	5.9	1129	30.5183	0.115125	19	2.65621	816.139	606	773
Sample1302	58.65	23.66	Europe	Estonia:Voosemetsa	forest: temperate coniferous forest biome	Continental	6.36667	6.88333	33.5249	0.7832	19	65.6	5.9	1129	30.5183	0.115125	19	2.65621	816.139	606	773
Sample1303	59.44	25.16	Europe	Estonia:Koogi	forest: temperate broadleaf forest biome	Continental	5.35833	7.28333	31.1905	0.9394	30	47.5	6.2	935	30.735	0.228022	30	2.60392	810.019	680	723
Sample1304	59.36	24.71	Europe	Estonia:M?niku	anthropogenic: village biome	Continental	5.64167	6.81667	30.9153	0.9229	46	58.4	5.7	1000	22.6269	0.341225	52	2.60392	793.333	681	737
Sample1360	59.58	24.54	Europe	Estonia:Naissaar Taani aed	forest: temperate broadleaf forest biome	Continental										2.03258	13	2.56209
Sample1361	59.56	24.55	Europe	Estonia:Naissaar port	forest: temperate coniferous forest biome	Continental						50.7				1.77703	21	2.56209
Sample1362	60.48	25.15	Europe	Finland:Lemmenlaakso	forest: tropical broadleaf forest biome	Continental	4.3875	8.10833	29.2268	0.9713	34	31.4	4.5	2179		0.292584	64	2.48889	854.151	676	695
Sample1363	61.9	26.04	Europe	Finland:Leivonm?i	forest: temperate coniferous forest biome	Continental	3.20833	7.86667	33.9813	0.9825	7	50.5	4.5	2702		0.0680241	133	2.36863	899.558	624	635
Sample1364	62.84	25.48	Europe	Finland:P??H?in NP	forest: temperate coniferous forest biome	Continental	2.85833	8.13333	35.6656	0.9474	10	52.7	4.6	2115			0	2.29542	906.153	598	631
Sample1365	63.2	24.19	Europe	Finland:Koirasalmi	forest: temperate coniferous forest biome	Continental	2.525	8.46667	34.5878	0.948	12	65.8	4.5	2533		0.108134	161	2.23268	883.347	587	620
Sample1366	63.41	23.92	Europe	Finland:Sillanp?	grassland: temperate grassland biome	Continental	2.625	8.18333	34.6132	0.8978	22	50.3	5.1	2478		0.343933	99	2.21699	889.799	555	618
Sample1367	61.91	23.4	Europe	Finland:Seitsem? NP	forest: temperate coniferous forest biome	Continental	3.20833	8.38333	30.1705	1.0729	9	63	4.5	2448		0.572392	173	2.4	849.09	677	630
Sample1368	61.85	24.29	Europe	Finland:Hyyti?a	forest: temperate coniferous forest biome	Continental	3.15833	8.26667	32.8486	1.0679	16	57.9	4.4	3315			0	2.40523	857.87	675	632
Sample1369	60.21	24.96	Europe	Finland:Helsinki	anthropogenic: urban biome	Continental	5.225	6.48333	30.0005	0.8971	60	36.8	5	1556		0.614292	25	2.49412	816.588	644	717
Sample1407	60.2	24.87	Europe	Finland:Helsinki:Munkinpuisto	anthropogenic: urban biome	Continental	5.22083	6.575	29.9207	0.8828	60	40.2	5.1			0.571463	11	2.49412	819.821	639	717
Sample1408	58.36	26.78	Europe	Estonia:Ihaste	forest: temperate broadleaf forest biome	Continental	5.48333	8.16667	35.6678	0.8258	42	53	6.2	1169		0.723646	42	2.76078	856.046	612	741
Sample1409	58.43	23.74	Europe	Estonia:Varbla Park	anthropogenic: village biome	Continental	6.27917	6.50833	32.7715	0.7714	24	57.1	5.9	1131	31.9475	0.0869522	29	2.7085	801.097	581	753
Sample1410	58.35	25.55	Europe	Estonia:Pinska	anthropogenic: rangeland biome	Continental	5.32083	7.99167	31.4169	0.8978	39	45.4	6.4	1233	33.9261	0.891198	77	2.7817	855.956	651	725
Sample1411	58.36	26.52	Europe	Estonia:R?u katsebaas:MycoPhyl	grassland: temperate grassland biome	Continental	5.45	8.1	33.7999	0.8459	18	49.8	6.4	1049	34.3071	0.2833	44	2.76078	844.808	623	736
Sample1412	58.36	26.52	Europe	Estonia:R?u katsebaas:Alleys	anthropogenic: village biome	Continental	5.45	8.1	33.7999	0.8459	18	49.8	6.4	1049	34.3071	0.2833	44	2.76078	844.808	623	736
Sample1413	58.36	26.52	Europe	Estonia:R?u katsebaas:Salix	anthropogenic: village biome	Continental	5.45	8.1	33.7999	0.8459	18	49.8	6.4	1049	34.3071	0.2833	44	2.76078	844.808	623	736
Sample1414	58.36	26.52	Europe	Estonia:R?u katsebaas:Poplar	anthropogenic: village biome	Continental	5.45	8.1	33.7999	0.8459	18	49.8	6.4	1049	34.3071	0.2833	44	2.76078	844.808	623	736
Sample1415	58.36	26.52	Europe	Estonia:R?u katsebaas:CO2	grassland: temperate grassland biome	Continental	5.45	8.1	33.7999	0.8459	18	49.8	6.4	1049	34.3071	0.2833	44	2.76078	844.808	623	736
Sample1416	58.36	26.66	Europe	Estonia:?su:Karja 10	anthropogenic: village biome	Continental	5.32917	8.14167	34.8836	0.8521	44	53.8	6.4	815	27.8875	0.702443	65	2.76078	851.575	624	732
Sample1417	50.8	4.49	Europe	Belgium:Tervuren	forest: temperate broadleaf forest biome	Temperate	9.86667	7.11667	11.7383	0.9864	34	19.2	4.9	675	36.2391	0.473005	131	3.89543	545.533	811	822
Sample1418	50.03	4.72	Europe	France:Givet	forest: temperate broadleaf forest biome	Temperate	9.44167	7.85	8.93203	1.0088	30	17.3	5.2	930	41.2463	6.43382	255	4.06797	556.053	823	815
Sample1419	49.62	5.89	Europe	Luxembourg:Grass	forest: temperate broadleaf forest biome	Temperate	8.82917	7.825	20.7972	1.1166	31	26.5	5.4	606	41.1049	0.736508	331	4.23529	607.07	950	850
Sample1420	50.77	5.97	Europe	Netherlands:Epenesbaan	forest: temperate broadleaf forest biome	Temperate	9.30833	7.05	9.37479	1.1142	36	15.2	4.8	817	40.436	3.73525	210	3.97386	563.475	923	828
Sample1421	50.77	5.96	Europe	Netherlands:Vijlne Rugveg	forest: temperate coniferous forest biome	Temperate	9.20833	7.05	9.05458	1.1299	24	16.3	4.8	942	37.4377	2.66619	245	3.97386	564.019	931	823
Sample1422	51.25	5.77	Europe	Netherlands:Weert	forest: temperate broadleaf forest biome	Temperate	9.94583	8.49167	12.7823	0.8663	44	64	5.4	617	34.3991	0	30	3.74379	565.048	723	834
Sample1476	28.53	-16.28	Europe	Spain:Tenerife:Mirador de Cruz de Carmen	forest: subtropical broadleaf forest biome	Temperate	15.3625	6.475	75.7793	0.2714	42	36.8	6.4	808	42.4582	1.28705	863	8.43399	287.585	450	1657
Sample1477	28.53	-16.29	Europe	Spain:Tenerife:Mirador de Jardine	forest: subtropical broadleaf forest biome	Temperate	15.3542	6.49167	75.6991	0.2691	42	37.3	6.4	866	44.0941	5.17664	852	8.43399	287.809	447	1660
Sample1478	28.13	-16.71	Europe	Spain:Tenerife:Barranco del Inferno	shrubland: xeric shrubland biome	Arid	18.0583	7.91667	78.7387	0.1713	38	35.4	7	503	11.3306	16.3185	566	8.54379	281.205	323	1885
Sample1479	28.17	-16.64	Europe	Spain:Tenerife:Vilaflor	forest: subtropical coniferous forest biome	Temperate	12.6833	9.03333	78.6031	0.2178	35	33.1	6.8	978	20.2165	11.0628	1598	8.54379	411.142	420	1927
Sample1480	28.04	-16.71	Europe	Spain:Tenerife:Llano de las Mesas	shrubland: xeric shrubland biome	Temperate										5.08058	90	8.54379
Sample1483	28.23	-16.63	Europe	Spain:Tenerife:Roques de Garcia	shrubland: xeric shrubland biome	Temperate	10.7583	10.5	81.5005	0.2023	28	41.3	7.1	597	5.64322	2.64678	2166	8.54379	473.794	417	2060
Sample1482	28.42	-16.38	Europe	Spain:Tenerife:La Reina	forest: subtropical coniferous forest biome	Temperate	14.9542	7.275	78.5465	0.2442	38	33.1	6.6	943	37.3469	9.02772	1076	8.54379	325.88	431	1764
Sample1481	28.11	-16.62	Europe	Spain:Tenerife:La Tafetana	shrubland: subtropical shrubland biome	Arid	16.6125	8.725	76.8291	0.1908	42	28.1	6.9	572	19.4957	7.95732	729	8.54379	317.77	364	1907
Sample1484	28.52	-16.29	Europe	Spain:Tenerife:Las Mercedes	forest: subtropical broadleaf forest biome	Temperate	16.0917	6.8	77.7723	0.2474	42	32.1	6.6	821	35.1893	5.4081	748	8.43399	283.315	419	1693
Sample1485	45.79	8.57	Europe	Italy:Monte Albano	forest: temperate broadleaf forest biome	Temperate	11.3208	9.925	24.5038	1.094	18	39.8	5.8	1062	24.172	3.5428	325	5.51111	723.277	1131	1033
Sample1486	45.79	8.6	Europe	Italy:Quassa	forest: temperate broadleaf forest biome	Temperate	11.5208	10.3917	24.6384	1.1018	26	40	6.1	783	39.9797	1.00122	212	5.51111	742.026	1131	1026
Sample1487	45.77	8.59	Europe	Italy:Oasis of Bruschera	forest: temperate broadleaf forest biome	Temperate	11.5708	10.275	24.6201	1.078	47	39	5.8	834	23.6948	0.5125	206	5.51111	741.63	1110	1029
Sample1488	45.77	8.6	Europe	Italy:Angera	grassland: temperate grassland biome	Temperate	11.5333	10.3333	24.639	1.1008	26				30.835	0.582416	212	5.51111	741.014	1126	1022
Sample1489	46.15	8.19	Europe	Italy:San Bernardo	forest: temperate coniferous forest biome	Continental	4.60833	8.26667	22.9459	1.0325	14	45.2	5.9	916		19.8698	1455	6.09674	583.137	955	924
Sample1490	46.12	8.2	Europe	Italy:Boca	forest: temperate broadleaf forest biome	Continental	8.18333	9.4	24.3193	1.1247	14	46.1	5.7	889	31.0136	18.5843	1027	6.09674	656.767	1078	958
Sample1491	45.97	7.94	Europe	Italy:Pecetto	grassland: montane grassland biome	Continental	4.525	8.78333	22.0381	0.9153	9	41.6	6.2	906		14.9407	1652	5.7098	606.924	811	885
Sample1504	60.28	24.96	Europe	Finland:Tammisto	forest: temperate broadleaf forest biome	Continental	5.0875	7.35833	29.6307	0.9199	38	25	5.5	1445		0.419092	22	2.49412	835.051	666	723
Sample1505	70.29	25.13	Europe	Norway:Kolvik	tundra biome	Polar/Montane	1.33333	6.25	23.0656	0.8555	22	57.1	5.5	2294		4.43409	39	1.50065	722.814	497	580
Sample1506	71.16	25.77	Europe	Norway:Nordkapp	tundra biome	Polar/Montane	1.825	2.55	20.9999	1.2888	16	57	6	2134		2.87273	291	1.31765	442.434	688	533
Sample1507	70.81	24.64	Europe	Norway:Snefjord	forest: subpolar coniferous forest biome	Continental	0.733333	4.8	19.1031	1.264	12	49.8	6	1975		11.5135	205	1.43791	629.417	650	514
Sample1508	70.61	24.62	Europe	Norway:Kokelv	grassland: temperate grassland biome	Continental	1.06667	5.43333	18.3422	1.1042		49.1	5.7	2135		2.64485	48	1.43791	647.247	595	538
Sample1509	70.11	23.49	Europe	Norway:Leirbotndalen	forest: subpolar coniferous forest biome	Continental	0.266667	6.46667	19.979	1.0221	16	56	5.2	2134		3.61923	156	1.54248	793.792	534	522
Sample1510	69.99	23.29	Europe	Norway:Alta	forest: temperate broadleaf forest biome	Continental										2.38446	12	1.74641
Sample1511	70.02	22.06	Europe	Norway:Alteidet	forest: subpolar coniferous forest biome	Continental	2.54167	4.65	24.5175	0.813	13	51.3	5.8	1784		1.18012	-1	1.47974	628.829	494	607
Sample1512	69.95	22.04	Europe	Norway:Burfjord	forest: temperate broadleaf forest biome	Continental	2.72917	4.94167	24.9764		19					15.3043	64	1.74641	641.718	473
Sample1513	69.5	20.82	Europe	Norway:Birtavarre	grassland: temperate grassland biome	Continental	1.95833	6.1	29.3877	0.8329			5.4	1897		9.99612	79	1.97647	757.774	468	561
Sample1514	69.36	21.12	Europe	Norway:Stuoranjarga	tundra biome	Polar/Montane	-2.22917	7.14167	29.3633	1.417	10	48	5.4	1701			865	1.98693	804.234	577	407
Sample1515	65.06	25.4	Europe	Finland:Letonniemi	forest: temperate broadleaf forest biome	Continental	2.075	7.56667	29.7985	0.8308	56	55.5	4.6	2308		0.511568	5	1.97124	936.183	504	606
Sample1516	57.91	27.32	Europe	Estonia:Ootsipalu	forest: temperate coniferous forest biome	Continental	5.4	7.86667	33.4835	0.8365	13	57	5.1	1436		0.266497	88	2.86013	862.757	629	751
Sample1532	58.37	26.68	Europe	Estonia:Tartu:Saialille	anthropogenic: urban biome	Continental	5.3625	8.14167	34.5519	0.8439	52	54.5		839	30.6341	0.513738	67	2.76078	853.932	622	736
Sample1533	58.42	26.66	Europe	Estonia:Vorbuse park	anthropogenic: village biome	Continental	5.38333	8.06667	34.7564	0.8426	29		6.1	1055		0.540401	45	2.76078	850.498	617	732
Sample1534	58.43	26.79	Europe	Estonia:M?latsi	anthropogenic: rangeland biome	Continental	5.225	8.15	34.5751	0.8492	39	55	6.4	1235	36.0881	0.779806	70	2.76078	853.795	617	726
Sample1535	58.27	26.84	Europe	Estonia:Villemi	anthropogenic: rangeland biome	Continental	5.2625	7.99167	35.3544	0.8421	21	62.9	6.8	1023		0.435924	77	2.76078	853.011	614	729
Sample1536	58.21	26.59	Europe	Estonia:Pangodi	forest: temperate broadleaf forest biome	Continental	5.10833	7.9	32.6839	0.8865	26	50.1	6.1	838	33.2554	0.280505	138	2.76078	837.602	638	719
Sample1537	58.28	26.77	Europe	Estonia:T?raste	forest: temperate broadleaf forest biome	Continental	5.33333	7.98333	35.517	0.8443	26	51	6.1	1230	31.5319	1.55314	58	2.76078	848.561	615	728
Sample1538	58.47	26.68	Europe	Estonia:V?bla	forest: temperate coniferous forest biome	Continental	5.2875	8.05833	34.7732	0.8442	34	49.1	6.3	1110	35.0251	0.748748	56	2.76078	848.143	614	727
Sample1539	58.45	26.71	Europe	Estonia:Maramaa	forest: temperate broadleaf forest biome	Continental	5.29583	8.125	34.5176	0.845	14	52.2	6.1	1280	31.5896	0.0801829	49	2.76078	847.994	617	730
Sample1540	58.37	26.58	Europe	Estonia:Tartu:Ringtee	forest: temperate coniferous forest biome	Continental	5.3375	8.09167	34.2375	0.8518	22	47.9	6.1	1135	46.9925	0.333918	60	2.76078	847.714	624	732
Sample1541	58.37	26.68	Europe	Estonia:Tartu:Ringtee	anthropogenic: rangeland biome	Continental	5.3625	8.14167	34.5519	0.8439	52	54.5		839	30.6341	0.513738	67	2.76078	853.932	622	736
Sample1542	58.18	26.8	Europe	Estonia:Aksi	forest: temperate broadleaf forest biome	Continental	5.25417	8.00833	34.0721	0.8523	26	58.2	6.3	823	34.3158	1.11806	87	2.76078	845.341	619	726
Sample1543	59.23	26.27	Europe	Estonia:Assamalla	forest: temperate broadleaf forest biome	Continental	5	7.98333	35.1383	0.8868	26	42.9	7	1014	29.7392	0.345527	117	2.60392	846.031	649	731
Sample1544	59.47	26.48	Europe	Estonia:Kunda-Aru	forest: temperate broadleaf forest biome	Continental	5.325	7.56667	35.0158	0.7992	37	55.9	6.3	1232	32.1214	0.228202	52	2.60392	826.184	595	744
Sample1545	59.48	26.5	Europe	Estonia:Ojak?a	forest: temperate broadleaf forest biome	Continental	5.33333	7.51667	35.0158	0.7985	51	60.4	6.4	864	31.7701	0.338634	59	2.60392	822.691	595	745
Sample1546	59.53	26.47	Europe	Estonia:Toolse linnus	forest: temperate broadleaf forest biome	Continental	5.60417	7.175	35.0336	0.7722			5.4	1380	27.1358	0.979032	3	2.55686	807.309	581	752
Sample1547	59.5	26.52	Europe	Estonia:Kunda	anthropogenic: urban biome	Continental	5.40417	7.425	33.8032	0.7972	43	58.7	6.2	1068		0.320154	54	2.60392	820.046	596	747
Sample1548	59.5	26.51	Europe	Estonia:Kunda	anthropogenic: urban biome	Continental	5.37083	7.44167	34.6394	0.7957	43	60.1	6.1	1255	28.4276	0.0640314	55	2.60392	818.673	593	745
Sample1549	59.52	26.54	Europe	Estonia:Kunda sadam	forest: temperate broadleaf forest biome	Continental	5.6625	7.24167	36.1713	0.7526						0.463735	5	2.5464	812.096	572	759
Sample1550	59.5	26.61	Europe	Estonia:Kuura	forest: temperate broadleaf forest biome	Continental	5.25417	7.39167	35.8943	0.7956	26	58.5	5.8	1072	31.05	0.184503	62	2.60392	819.857	589	740
Sample1551	59.5	26.58	Europe	Estonia:Malla	forest: temperate broadleaf forest biome	Continental	5.3125	7.425	35.9765	0.7846	34	59.4	6	1025	34.3725	0.173904	61	2.60392	820.128	586	746
Sample1552	59.49	26.54	Europe	Estonia:Kunda	forest: temperate broadleaf forest biome	Continental	5.375	7.5	35.0453	0.7917	43	58.1	6.2	1033	35.6803	0.064018	49	2.60392	822.293	592	747
Sample1553	58.36	26.69	Europe	Estonia:Tartu:Riia	anthropogenic: urban biome	Continental	5.34583	8.125	35.0595	0.8484	52		6.3	1214	26.2925	0.323575	77	2.76078	853.007	624	735
Sample1554	58.18	26.82	Europe	Estonia:Voorek?a	forest: temperate coniferous forest biome	Continental	5.2875	7.975	34.4463	0.8454	26	58.3	6.2	800	33.0082	0.770251	77	2.76078	848.834	616	728
Sample1555	58.38	25.61	Europe	Estonia:Peelim?sa	forest: temperate broadleaf forest biome	Continental	5.43333	8.05	30.721	0.8766	52	49.4	6.3	905		0.438358	84	2.7817	855.868	647	738
Sample1556	58.38	25.6	Europe	Estonia:Viljandi	anthropogenic: urban biome	Continental	5.40833	8.06667	30.721	0.8765	52	49.5	6.1	896	31.5838	0.282444	84	2.7817	856.446	647	738
Sample1557	58.38	25.59	Europe	Estonia:Viljandi	anthropogenic: urban biome	Continental	5.36667	8.08333	31.014	0.8791	52	48.4	6.2	980	34.1629	0.168373	89	2.7817	857.675	647	735
Sample1558	58.37	25.59	Europe	Estonia:Viljandi	anthropogenic: urban biome	Continental	5.39167	8.08333	31.2191	0.88	52					0.0552728	90	2.7817	858.696	649	737
Sample1559	58.37	25.59	Europe	Estonia:Viljandi	anthropogenic: urban biome	Continental	5.39167	8.08333	31.2191	0.88	52					0.0552728	90	2.7817	858.696	649	737
Sample1560	58.36	25.6	Europe	Estonia:Viljandi	forest: temperate broadleaf forest biome	Continental	5.475	8.06667	31.0647	0.875	52	47.6	6			1.525	78	2.7817	859.428	646	738
Sample1561	58.36	25.61	Europe	Estonia:Viljandi	anthropogenic: urban biome	Continental	5.52083	8.075	30.8572	0.8663	52					1.23742	65	2.7817	858.864	642	741
Sample1562	59.35	24.5	Europe	Estonia:P?a	forest: temperate broadleaf forest biome	Continental	5.73333	6.71667	30.9003	0.8998	43	48.9	6.2	963	33.6886	0.816824	33	2.60392	804.675	668	742
Sample1563	59.33	24.35	Europe	Estonia:Niitv?ja	forest: temperate broadleaf forest biome	Continental	5.875	6.56667	31.4367	0.8698	43	56.9	5.6	1385	28.0294	0.649383	34	2.60392	809.892	656	754
Sample1564	59.34	24.2	Europe	Estonia:P?lk?a	forest: temperate broadleaf forest biome	Continental	6.25	6.06667	32.9201	0.8281			5.3	1657	27.2156	0.933651	6	2.60392	806.758	638	770
Sample1565	59.37	24.04	Europe	Estonia:Paldiski	forest: temperate broadleaf forest biome	Continental	6.60417	5.65833	33.7894	0.7781	16	62.7	5.1	1635		1.54125	17	2.60392	805.607	622	799
Sample1566	59.42	24.77	Europe	Estonia:Tallinn:J?vevana	forest: temperate broadleaf forest biome	Continental	5.82917	6.60833	31.2255	0.9132	60					0.911427	32	2.60392	788.322	680	744
Sample1567	59.45	24.69	Europe	Estonia:Tallinn:Stroomi	anthropogenic: urban biome	Continental	5.90417	6.64167	30.8132	0.8668	56					0.457077	10	2.60392	788.694	654	756
Sample1568	59.4	24.71	Europe	Estonia:Tallinn:Mustam?	anthropogenic: urban biome	Continental	5.82917	6.79167	30.9681	0.9069	60					0.814976	40	2.60392	797.184	681	750
Sample1569	57.91	26.99	Europe	Estonia:Parksepa	forest: temperate broadleaf forest biome	Continental	5.47083	8.025	32.6887	0.8443	26	53.2	6.2	850	27.2117	0.218185	81	2.86536	860.207	635	752
Sample1570	57.98	26.87	Europe	Estonia:P?gaste	anthropogenic: village biome	Continental	5.27083	7.89167	32.8516	0.8759	14	56.1	5.9	1089	31.445	0.163963	126	2.86536	849.188	643	734
Sample1571	58.31	26.58	Europe	Estonia:N?iaru	anthropogenic: village biome	Continental	5.3	8.1	34.012	0.8585	26	56.3	6.2	1211	27.4283	0.387309	77	2.76078	845.851	627	730
Sample1572	58.39	26.72	Europe	Estonia:Tartu:Emaj?	anthropogenic: urban biome	Continental	5.57083	8.14167	34.9533	0.821	50					0.782794	44	2.76078	858.144	616	750
Sample1573	58.36	26.74	Europe	Estonia:Tartu:Tigutorn	anthropogenic: urban biome	Continental	5.64583	8.175	35.3417	0.8162	52					0.884072	40	2.76078	860.255	617	755
Sample1574	58.24	26.7	Europe	Estonia:Kambja	anthropogenic: village biome	Continental	5.22083	7.95833	33.6637	0.8627	26	53.3	6.2	829	31.4938	0.743153	85	2.76078	843.681	626	725
Sample1575	58.25	26.89	Europe	Estonia:Aadami	forest: temperate broadleaf forest biome	Continental	5.26667	8	34.9744	0.8419	26	55.2	6.6	1006	29.0169	0.288792	75	2.76078	854.183	614	729
Sample1576	58.4	26.77	Europe	Estonia:Tartu:Raadi	anthropogenic: rangeland biome	Continental	5.39167	8.15	34.9274	0.8346	34	50.8	6.4	1193	31.3058	0.202431	66	2.76078	856.239	617	739
Sample1577	58.38	26.77	Europe	Estonia:Tartu:R?mu	anthropogenic: urban biome	Continental	5.47083	8.14167	34.8135	0.8307	44					0.686626	58	2.76078	856.516	617	742
Sample1578	58.38	26.77	Europe	Estonia:Tartu:R?mu	anthropogenic: urban biome	Continental	5.47083	8.14167	34.8135	0.8307	44					0.686626	58	2.76078	856.516	617	742
Sample1579	58.39	26.8	Europe	Estonia:Rooba	forest: temperate broadleaf forest biome	Continental	5.26667	8.13333	34.6481	0.8453	35	54.4	6.2	1242	32.5076	0.220284	68	2.76078	853.789	616	728
Sample1580	58.61	26.2	Europe	Estonia:Pikknurme	forest: temperate coniferous forest biome	Continental	5.39167	8.16667	33.071	0.8812	26	42.9	6.3	759	39.5292	0.206457	53	2.7085	842.428	645	731
Sample1581	58.65	26.01	Europe	Estonia:Annikvere	anthropogenic: village biome	Continental	5.4	8.35	32.6594	0.8889	39	39.7	6.6	893	39.8612	0.0627974	60	2.7085	852.875	655	736
Sample1582	58.66	25.97	Europe	Estonia:P?tsamaa	anthropogenic: urban biome	Continental	5.39167	8.35	32.5857	0.8868	34	43.6	6.1	931		0.128632	67	2.71372	851.741	657	740
Sample1583	58.66	25.97	Europe	Estonia:P?tsamaa	anthropogenic: urban biome	Continental	5.39167	8.35	32.5857	0.8868	34	43.6	6.1	931		0.128632	67	2.71372	851.741	657	740
Sample1584	58.74	25.81	Europe	Estonia:Kiigevere	anthropogenic: village biome	Continental	5.39167	8.31667	32.495	0.8991	17	41.6	6.5	907	27.2783	0.392022	70	2.71372	848.354	665	739
Sample1585	58.09	27.09	Europe	Estonia:Himmaste	anthropogenic: village biome	Continental	5.47083	7.975	33.7005	0.8318	31	51.3	6	939		0.944297	64	2.76078	859.732	621	746
Sample1586	58.37	26.85	Europe	Estonia:Luunja	anthropogenic: village biome	Continental	5.325	8.1	35.391	0.8342	39	55.3	6.3	1093	32.7594	0.323577	50	2.76078	854.934	610	731
Sample1587	58.47	26.71	Europe	Estonia:Vasula aed	anthropogenic: village biome	Continental	5.29583	8.09167	34.6481	0.8451	22	50.8	6.3	1141	35.8673	0.20623	44	2.76078	849.694	614	726
Sample1588	58.23	27.31	Europe	Estonia:Sikakurmu	forest: temperate broadleaf forest biome	Continental	5.37917	7.825	34.192	0.8301	10	45.7	5.5	1322		0.186644	48	2.76078	863.211	614	739
Sample1589	58.35	26.62	Europe	Estonia:Haage	anthropogenic: village biome	Continental	5.36667	8.11667	34.2186	0.8512	39	49.5	6.3	903	36.7846	0.351077	52	2.76078	849.236	624	733
Sample1590	59.11	26.23	Europe	Estonia:Ebavere	anthropogenic: village biome	Continental	5.03333	8.13333	36.1263	0.8968	31	46.9	6.7	815	33.5383	0.57115	115	2.60392	853.797	656	731
Sample1591	59.31	26.32	Europe	Estonia:T?ma	anthropogenic: village biome	Continental	5.15833	7.9	35.4213	0.8567	36	41.4	6.9	1076	25.2403	0.306668	92	2.60392	843.132	637	743
Sample1592	58.32	25.53	Europe	Estonia:N?iaru	anthropogenic: village biome	Continental	5.34167	7.9	31.5204	0.8956	34	51.2	5.8	1210		0.350841	50	2.7817	858.06	648	723
Sample1593	59.41	27.67	Europe	Estonia:Vaivina	woodland: woodland: temperate woodland biome	Continental	4.80833	7.58333	36.2568	0.8521	12	61.1	5.4	1197	30.4686	0.393624	45	2.60392	868.891	617	724
Sample1594	59.39	27.78	Europe	Estonia:Sillam?	woodland: woodland: temperate woodland biome	Continental	4.92917	7.575	35.2481	0.8494		59.5	5.7	1185	27.9422	0.772048	31	2.60392	873.83	623	733
Sample1595	59.38	27.36	Europe	Estonia:Kukruse	anthropogenic: village biome	Continental	4.62917	7.875	38.2752	0.8683	54	60.6	6.4	1043	34.0854	0.387436	68	2.60392	885.662	625	719
Sample1596	59.41	27.11	Europe	Estonia:Moldova	anthropogenic: village biome	Continental	4.84167	7.76667	38.8995	0.8547	30	56.5	6.7	1006	27.0642	0.162519	49	2.60392	861.383	614	718
Sample1597	59.39	28.19	Europe	Estonia:Narva	anthropogenic: urban biome	Continental	5.125	7.68333	34.498	0.851	45	53.7	5.9	1008		0.660086	21	2.60915	874.265	640	752
Sample1598	59.4	28.07	Europe	Estonia:Peeterristi	forest: temperate broadleaf forest biome	Continental	4.84167	7.73333	34.3996	0.8739	25	59.5	5.9	1112	32.9206	0.505701	31	2.60915	876.511	640	732
Sample1599	58.36	26.39	Europe	Estonia:R?si	forest: temperate broadleaf forest biome	Continental	5.45833	8.25	32.9953	0.8667	14	52.1	6.2	925	34.0801	0.256862	45	2.76078	846.616	638	736
Sample1600	58.35	26.68	Europe	Estonia:Tartu:FI	anthropogenic: urban biome	Continental	5.34167	8.1	34.6281	0.8439	52	53.5	6.4	930	33.5324	0.266638	71	2.76078	850.002	620	734
Sample1601	58.63	26.39	Europe	Estonia:S? arboretum	forest: temperate coniferous forest biome	Continental	5.33333	8.08333	33.6687	0.8705	15	38.4	6	1094		0.46179	60	2.7085	839.998	634	728
Sample1602	58.63	26.39	Europe	Estonia:S? arboretum	forest: temperate coniferous forest biome	Continental	5.33333	8.08333	33.6687	0.8705	15	38.4	6	1094		0.46179	60	2.7085	839.998	634	728
Sample1603	58.64	26.38	Europe	Estonia:S? arboretum	forest: temperate coniferous forest biome	Continental	5.3125	8.05833	33.961	0.8759	20	43.3	5.9	1385	32.0942	0.352236	68	2.7085	838.5	637	727
Sample1604	58.58	26.7	Europe	Estonia:Kaiavere	anthropogenic: village biome	Continental	5.21667	8.01667	34.5547	0.8423	26	49.3	6.1	913	28.1513	0.445697	55	2.70327	855.826	613	727
Sample1605	58.05	27.04	Europe	Estonia:P?va	anthropogenic: urban biome	Continental	5.46667	7.93333	32.8974	0.8334	34	61.2	5.8	1190	35.676	0.128225	81	2.76078	860.141	624	748
Sample1606	59.35	26.35	Europe	Estonia:Rakvere	anthropogenic: urban biome	Continental	5.25	7.88333	35.0362	0.84	50					0.676232	82	2.60392	843.235	631	751
Sample1607	59.35	26.27	Europe	Estonia:Kariv?ava	anthropogenic: village biome	Continental	5.14167	7.91667	34.8072	0.8522	26	44.4	6.9	1015	31.13	0.173904	86	2.60392	841.446	633	742
Sample1608	59.35	26.11	Europe	Estonia:Undla	anthropogenic: village biome	Continental	5.07917	7.99167	34.2687	0.8945	18	44	6.3	1070	30.95	0.423552	84	2.60392	842.077	654	731
Sample1609	59.43	24.86	Europe	Estonia:Tallinn:Kuuli	anthropogenic: urban biome	Continental	5.6375	7.10833	30.3777	0.9256	60					0.173412	44	2.60392	804.541	687	742
Sample1610	58.78	25.43	Europe	Estonia:S?evere	forest: temperate broadleaf forest biome	Continental	5.525	8.33333	32.1871	0.9194	41	37	6	950	33.1879	0.0805357	60	2.71372	843.775	689	749
Sample1611	58.87	24.53	Europe	Estonia:Kasti	anthropogenic: village biome	Continental	5.825	7.1	30.693	0.9549	18			1058	31.4165	0.0806454	39	2.70327	811.442	714	747
Sample1612	58.91	24.9	Europe	Estonia:Nadalama	forest: temperate broadleaf forest biome	Continental	5.4875	7.44167	29.6353	0.996	40	41.6	6.5	1016	30.6038	0.341776	72	2.70327	819.454	730	732
Sample1613	58.91	24.9	Europe	Estonia:Nadalama	forest: temperate broadleaf forest biome	Continental	5.4875	7.44167	29.6353	0.996	40	41.6	6.5	1016	30.6038	0.341776	72	2.70327	819.454	730	732
Sample1614	58.28	27.29	Europe	Estonia:Agali arboretum	forest: temperate coniferous forest biome	Continental	5.3875	7.70833	35.4338	0.8215	18	52.5	5.6	1007	35.9788	0.411827	43	2.76078	855.307	607	738
Sample1615	58.28	27.29	Europe	Estonia:Agali arboretum	forest: temperate broadleaf forest biome	Continental	5.3875	7.70833	35.4338	0.8215	18	52.5	5.6	1007	35.9788	0.411827	43	2.76078	855.307	607	738
Sample1616	58.28	27.29	Europe	Estonia:Agali arboretum	forest: temperate coniferous forest biome	Continental	5.3875	7.70833	35.4338	0.8215	18	52.5	5.6	1007	35.9788	0.411827	43	2.76078	855.307	607	738
Sample1617	58.28	27.28	Europe	Estonia:Agali arboretum	forest: temperate coniferous forest biome	Continental	5.38333	7.71667	35.3367	0.8205	18	51	5.7	1268	36.2988	0.155053	45	2.76078	855.329	606	738
Sample1618	58.28	27.28	Europe	Estonia:Agali arboretum	forest: temperate coniferous forest biome	Continental	5.38333	7.71667	35.3367	0.8205	18	51	5.7	1268	36.2988	0.155053	45	2.76078	855.329	606	738
Sample1619	58.28	27.28	Europe	Estonia:Agali arboretum	forest: temperate broadleaf forest biome	Continental	5.38333	7.71667	35.3367	0.8205	18	51	5.7	1268	36.2988	0.155053	45	2.76078	855.329	606	738
Sample1620	58.28	27.28	Europe	Estonia:Agali arboretum	forest: temperate broadleaf forest biome	Continental	5.38333	7.71667	35.3367	0.8205	18	51	5.7	1268	36.2988	0.155053	45	2.76078	855.329	606	738
Sample1621	58.28	27.28	Europe	Estonia:Agali arboretum	forest: temperate coniferous forest biome	Continental	5.38333	7.71667	35.3367	0.8205	18	51	5.7	1268	36.2988	0.155053	45	2.76078	855.329	606	738
Sample1622	58.28	27.29	Europe	Estonia:Agali arboretum	forest: temperate coniferous forest biome	Continental	5.3875	7.70833	35.4338	0.8215	18	52.5	5.6	1007	35.9788	0.411827	43	2.76078	855.307	607	738
Sample1623	58.28	27.29	Europe	Estonia:Agali arboretum	forest: temperate broadleaf forest biome	Continental	5.3875	7.70833	35.4338	0.8215	18	52.5	5.6	1007	35.9788	0.411827	43	2.76078	855.307	607	738
Sample1624	58.28	27.05	Europe	Estonia:V?nu	anthropogenic: village biome	Continental	5.3625	8.075	34.7675	0.8329	17	54.5	6.3	1038	32.6739	0.498294	43	2.76078	858.058	613	735
Sample1625	58.38	26.59	Europe	Estonia:Rahinge	forest: temperate broadleaf forest biome	Continental	5.37917	8.075	34.3225	0.8509	22	47.8	6.2	1203	34.1217	0.285085	48	2.76078	847.927	624	733
Sample1626	58.38	26.68	Europe	Estonia:Tartu	anthropogenic: urban biome	Continental	5.38333	8.13333	34.306	0.8447	52	51.3	6.3	1011	26.3838	0.385326	59	2.76078	853.387	622	736
Sample1627	57.55	25.44	Europe	Latvia:Valmiera	anthropogenic: urban biome	Continental	5.42083	7.24167	32.9305	0.9423	42					0.434332	54	2.88105	872.946	681	722
Sample1628	57.26	24.88	Europe	Latvia:Inciems	anthropogenic: village biome	Continental	5.325	6.73333	32.8621	0.9677	18	52.1	6.2	715	29.0888	1.03538	82	2.90719	842.935	679	701
Sample1629	57.04	24.4	Europe	Latvia:Garkalne	anthropogenic: village biome	Continental	6.025	6.95	32.3593	0.9103	40	59.8	6.2	1061	24.9608	0.258276	14	2.8915	814.018	652	716
Sample1630	56.87	24.36	Europe	Latvia:Salaspils	anthropogenic: urban biome	Continental	6.15833	7.05	30.9282	0.8823	50	59	6.2	975	29.6479	0.266191	22	2.96471	807.929	646	732
Sample1631	56.87	24.36	Europe	Latvia:Salaspils	anthropogenic: urban biome	Continental	6.15833	7.05	30.9282	0.8823	50	59	6.2	975	29.6479	0.266191	22	2.96471	807.929	646	732
Sample1632	56.87	24.35	Europe	Latvia:Salaspils	anthropogenic: urban biome	Continental	6.1625	7.05833	31.1657	0.8846	54	59.1		881	30.0007	0.376788	22	2.96471	807.344	648	732
Sample1633	56.87	24.35	Europe	Latvia:Salaspils	anthropogenic: urban biome	Continental	6.1625	7.05833	31.1657	0.8846	54	59.1		881	30.0007	0.376788	22	2.96471	807.344	648	732
Sample1634	56.87	24.35	Europe	Latvia:Salaspils	anthropogenic: urban biome	Continental	6.1625	7.05833	31.1657	0.8846	54	59.1		881	30.0007	0.376788	22	2.96471	807.344	648	732
Sample1635	56.87	24.36	Europe	Latvia:Salaspils	anthropogenic: urban biome	Continental	6.15833	7.05	30.9282	0.8823	50	59	6.2	975	29.6479	0.266191	22	2.96471	807.929	646	732
Sample1636	58.37	26.75	Europe	Estonia:Tartu	anthropogenic: urban biome	Continental	5.67083	8.20833	35.4607	0.8132	52					0.385308	39	2.76078	860.181	615	756
Sample1637	58.36	26.64	Europe	Estonia:M?ja	anthropogenic: village biome	Continental	5.3625	8.125	34.6376	0.847	39	50.8	6.2	963	36.5783	0.403806	56	2.76078	851.248	620	731
Sample1638	58.28	26.66	Europe	Estonia:L?i	forest: temperate broadleaf forest biome	Continental	5.32083	7.95833	34.6541	0.8471	22	57.7	6.2	1042		0.261765	75	2.76078	840.247	618	729
Sample1639	58.5	26.84	Europe	Estonia:Soek?a	forest: temperate broadleaf forest biome	Continental	5.2125	8.05833	35.163	0.8387	26	49.6	5.7	1097	35.4088	0.103138	50	2.76078	851.299	608	724
Sample1640	58.19	26.3	Europe	Estonia:Teedla	forest: temperate broadleaf forest biome	Continental	5.3	8.25	31.1788	0.8894	26	48.6	5.7	788	35.1319	0.128319	79	2.76078	841.033	647	727
Sample1641	57.87	26.1	Europe	Estonia:Sooru	forest: temperate broadleaf forest biome	Continental	5.42083	8.19167	29.7054	0.9097	23	48.3	6.3	1126		0.962309	67	2.87059	826.973	659	724
Sample1642	57.87	27.25	Europe	Estonia:Pikakannu	forest: temperate broadleaf forest biome	Continental	5.4125	7.90833	33.313	0.8524	22	52.9	5.3	843		0.657866	102	2.86013	863.795	638	748
Sample1643	58.23	27.31	Europe	Estonia:Sikakurmu	forest: temperate broadleaf forest biome	Continental	5.37917	7.825	34.192	0.8301	10	45.7	5.5	1322		0.186644	48	2.76078	863.211	614	739
Sample1644	57.91	26.1	Europe	Estonia:T?liste	forest: temperate broadleaf forest biome	Continental	5.35	8.13333	30.3231	0.9164	11	53.8	5.5	1397		1.11516	68	2.87059	828.879	663	723
Sample1645	58.23	26.96	Europe	Estonia:Lootvina	forest: temperate broadleaf forest biome	Continental	5.275	7.96667	35.1169	0.8491	18	57.5	5.8	1337	35.4204	0.360695	81	2.76078	850.119	620	730
Sample1646	57.56	26.66	Europe	Estonia:Vastse-Roosa	forest: temperate broadleaf forest biome	Continental	5.59167	7.8	30.6376	0.8909	16	47	5.2	1139	35.6667	0.600738	84	2.86536	824.769	660	740
Sample1647	58.73	25.35	Europe	Estonia:Muruoja	forest: temperate broadleaf forest biome	Continental	5.51667	8.16667	31.5034	0.9219	26	43.2	6.3	1232	36.5756	0.266241	56	2.71372	844.152	687	745
Sample1648	58.83	26.38	Europe	Estonia:Rohe	forest: temperate broadleaf forest biome	Continental	5.175	8.05	35.0791	0.8766	22	47.9	5.9	1743	37.0908	0.365882	80	2.7085	839.598	635	724
Sample1649	57.77	26.27	Europe	Estonia:Pikkj?ve	forest: temperate broadleaf forest biome	Continental	5.49583	8.19167	31.2423	0.8772	28	53.4	5.5	1214	32.7621	0.352025	62	2.87059	826.778	644	734
Sample1650	58.7	26.33	Europe	Estonia:Siimusti	forest: temperate broadleaf forest biome	Continental	5.2625	8.15833	33.8669	0.8848	14	46.5	6.2	1104		0.103306	69	2.7085	845.133	643	726
Sample1651	58.27	27.29	Europe	Estonia:J?vselja	forest: temperate broadleaf forest biome	Continental	5.36667	7.73333	34.7924	0.832	10	51.1	5.6	998	33.915	0.31996	52	2.76078	856.503	614	737
Sample1652	58.27	27.31	Europe	Estonia:J?vselja	forest: temperate broadleaf forest biome	Continental	5.3875	7.69167	35.12	0.8268	10	51.7	5.5	1211	33.6821	0.558	47	2.76078	857.253	611	738
Sample1653	58.28	27.31	Europe	Estonia:J?vselja	forest: temperate broadleaf forest biome	Continental	5.39167	7.66667	35.0305	0.8279	18	51.1	5.6	1312	32.2017	0.0289841	45	2.76078	857.3	612	739
Sample1654	58.28	27.33	Europe	Estonia:J?vselja	forest: temperate broadleaf forest biome	Continental	5.37917	7.65833	34.8574	0.8284	10	51.5	5.5	1340	32.9903	0.553434	53	2.76078	857.887	612	738
Sample1655	58.25	27.28	Europe	Estonia:J?vselja	forest: temperate broadleaf forest biome	Continental	5.37083	7.80833	35.1127	0.8245	18	51.1	5.6	1688	37.6967	0.173904	50	2.76078	861	610	739
Sample1656	58.26	27.27	Europe	Estonia:J?vselja	forest: temperate broadleaf forest biome	Continental	5.37083	7.79167	34.9633	0.8283	18	50.7	5.6	1609	37.5113	0.0622516	46	2.76078	857.336	612	738
Sample1657	58.28	27.32	Europe	Estonia:J?vselja	forest: temperate broadleaf forest biome	Continental	5.3875	7.675	34.9563	0.8272	10	50.6	5.5	1267	32.0489	0.56169	49	2.76078	857.579	611	738
Sample1658	58.29	27.27	Europe	Estonia:J?vselja	forest: temperate broadleaf forest biome	Continental	5.38333	7.76667	35.046	0.8218	10	51.1	5.5	1152	35.4201	0.124601	46	2.76078	855.945	607	738
Sample1659	58.25	27.27	Europe	Estonia:J?vselja	forest: temperate broadleaf forest biome	Continental	5.37083	7.84167	34.6999	0.8283	18	50.2	5.6	1440	36.2565	0.0622394	48	2.76078	860.593	613	740
Sample1660	57.97	26.49	Europe	Estonia:Kaurutootsi	forest: temperate broadleaf forest biome	Continental	5.0625	7.875	31.6576	0.9217	17	53.8	5.5	1188		0.804029	140	2.87059	832.674	659	714
Sample1661	58.26	27.29	Europe	Estonia:J?vselja	forest: temperate broadleaf forest biome	Continental	5.375	7.75	35.0305	0.8285	10	47.7	5.7	1439	35.3786	0.288858	51	2.76078	857.036	612	738
Sample1662	58.26	27.29	Europe	Estonia:J?vselja	forest: temperate broadleaf forest biome	Continental	5.375	7.75	35.0305	0.8285	10	47.7	5.7	1439	35.3786	0.288858	51	2.76078	857.036	612	738
Sample1663	58.3	27.3	Europe	Estonia:J?vselja	forest: temperate broadleaf forest biome	Continental	5.4	7.68333	34.9386	0.8203	18	50	5.5	1486	35.9442	0.277325	45	2.76078	856.688	607	739
Sample1664	58.27	27.33	Europe	Estonia:J?vselja	forest: temperate broadleaf forest biome	Continental	5.35417	7.65833	35.2089	0.826	18	51.5	5.4	1081	31.7521	0.159981	60	2.76078	857.67	610	738
Sample1665	58.25	27.29	Europe	Estonia:J?vselja	forest: temperate broadleaf forest biome	Continental	5.375	7.8	35.2159	0.8255	10	52	5.6	1048	36.956	0.128354	48	2.76078	861.018	611	740
Sample1666	58.27	27.29	Europe	Estonia:J?vselja	forest: temperate broadleaf forest biome	Continental	5.36667	7.73333	34.7924	0.832	10	51.1	5.6	998	33.915	0.31996	52	2.76078	856.503	614	737
Sample1667	58.28	27.33	Europe	Estonia:J?vselja	forest: temperate broadleaf forest biome	Continental	5.37917	7.65833	34.8574	0.8284	10	51.5	5.5	1340	32.9903	0.553434	53	2.76078	857.887	612	738
Sample1668	58.26	27.28	Europe	Estonia:J?vselja	forest: temperate broadleaf forest biome	Continental	5.375	7.76667	34.9633	0.8282	18	52.3	5.6	1186	36.4644	0.281494	46	2.76078	857.696	612	738
Sample1669	58.28	27.33	Europe	Estonia:J?vselja	forest: temperate broadleaf forest biome	Continental	5.37917	7.65833	34.8574	0.8284	10	51.5	5.5	1340	32.9903	0.553434	53	2.76078	857.887	612	738
Sample1670	58.27	27.32	Europe	Estonia:J?vselja	forest: temperate broadleaf forest biome	Continental	5.375	7.7	35.0305	0.8282	18	52.5	5.4	1160	32.199	0.772914	55	2.76078	857.58	612	738
Sample1671	58.33	26.56	Europe	Estonia:N?iaru	forest: temperate broadleaf forest biome	Continental	5.3375	8.10833	33.8135	0.8568	26	51.5	6.2	881	33.3464	0.388414	69	2.76078	847.387	627	731
Sample1672	58.26	27.3	Europe	Estonia:J?vselja	forest: temperate broadleaf forest biome	Continental	5.37917	7.725	35.12	0.8264	10	51.6	5.5	1194	34.6213	0.350293	51	2.76078	857.559	611	739
Sample1673	58.18	27.41	Europe	Estonia:Naha	forest: temperate broadleaf forest biome	Continental	5.42917	7.775	34.5426	0.8281	26	48.3	5.5	1470	35.2508	0.227439	44	2.76078	866.412	616	743
Sample1674	58.12	27.21	Europe	Estonia:Kaaru	forest: temperate broadleaf forest biome	Continental	5.40417	7.90833	33.6143	0.8275	26	50.2	5.4	1180	33.4267	0.283011	57	2.76078	862.935	617	745
Sample1675	58.5	26.91	Europe	Estonia:Vara	forest: temperate broadleaf forest biome	Continental	5.175	8.01667	34.8016	0.8439	22	51.4	6	1569	34.7275	0.365068	59	2.76078	852.684	611	723
Sample1676	58.59	25.25	Europe	Estonia:Kootsi	forest: temperate broadleaf forest biome	Continental	5.49583	7.74167	32.2614	0.9302	15	50.4	5.7	1230		0.173904	38	2.71372	839.065	681	732
Sample1677	57.75	26.26	Europe	Estonia:Karula	forest: temperate broadleaf forest biome	Continental	5.44583	8.225	31.3715	0.8863	9	51	5.5	1344	34.2231	0.317758	76	2.87059	824.887	647	729
Sample1726	57.94	27.36	Europe	Estonia:Meenikunno	forest: temperate coniferous forest biome	Continental	5.46667	7.71667	34.6101	0.8353	10	60.3	5	1229	32.8658	0.383295	71	2.86013	855.757	625	748
Sample1727	57.93	27.35	Europe	Estonia:Meenikunno	forest: temperate coniferous forest biome	Continental	5.47083	7.75833	34.4102	0.8321	10	56.8	5.1	1130	29.7706	0.30902	71	2.86013	856.615	622	747
Sample1728	57.96	27.29	Europe	Estonia:Meenikunno	forest: temperate coniferous forest biome	Continental	5.41667	7.8	34.1249	0.8433	13	59.6	5.4	1428		0.205375	74	2.86013	862.745	627	743
Sample1729	57.94	27.35	Europe	Estonia:Meenikunno	forest: temperate coniferous forest biome	Continental	5.45	7.75	34.4101	0.8347	10	57.7	5.7	1228	32.4225	0.0618165	77	2.86013	857.6	626	749
Sample1730	57.94	27.35	Europe	Estonia:Meenikunno	forest: temperate coniferous forest biome	Continental	5.45	7.75	34.4101	0.8347	10	57.7	5.7	1228	32.4225	0.0618165	77	2.86013	857.6	626	749
Sample1731	57.92	27.29	Europe	Estonia:Meenikunno	forest: temperate coniferous forest biome	Continental	5.425	7.9	33.7909	0.842	13	60.4	5.2	881		0.266502	87	2.86013	865.672	630	748
Sample1732	43.08	42.72	Europe	Georgia:Samegrelo-Zemo Svaneti:Mestia	grassland: montane grassland biome	Continental	1.91667	7.96667	20.4607	1.3377	14	39	5.1	1065		26.5352	2134	6.53072	699.03	1195	893
Sample1733	43.08	42.72	Europe	Georgia:Samegrelo-Zemo Svaneti:Mestia	grassland: montane grassland biome	Continental	1.91667	7.96667	20.4607	1.3377	14	39	5.1	1065		26.5352	2134	6.53072	699.03	1195	893
Sample1734	43.04	42.73	Europe	Georgia:Samegrelo-Zemo Svaneti:Mestia	forest: temperate coniferous forest biome	Continental	5.2875	9.10833	17.732	1.1146	14	38.8	5.7	957		12.2121	1497	6.53072	738.694	1053	944
Sample1735	43.02	42.74	Europe	Georgia:Samegrelo-Zemo Svaneti:Mestia	forest: temperate broadleaf forest biome	Continental	3.12917	8.10833	17.516	1.2457	14	37.3	5.2	1268		6.58614	2197	6.53072	695.621	1186	952
Sample1736	43.02	42.73	Europe	Georgia:Samegrelo-Zemo Svaneti:Mestia	forest: temperate coniferous forest biome	Continental	3.35833	8.21667	17.4521	1.2345	14	36	5.2	1259		11.2721	2104	6.53072	697.902	1179	955
Sample1737	43.04	42.7	Europe	Georgia:Samegrelo-Zemo Svaneti:Mestia	forest: temperate broadleaf forest biome	Continental	5.49167	9.28333	16.2937	1.1369	14	36.7	6	1115	34.3317	12.66	1498	6.53072	745.047	1061	933
Sample1738	43.06	42.69	Europe	Georgia:Samegrelo-Zemo Svaneti:Mestia	forest: temperate broadleaf forest biome	Continental	1.77917	8.14167	19.1296	1.3439	10	33.9	5.2	1173		23.7417	2190	6.53072	699.31	1208	898
Sample1739	43.06	42.69	Europe	Georgia:Samegrelo-Zemo Svaneti:Mestia	forest: temperate coniferous forest biome	Continental	1.77917	8.14167	19.1296	1.3439	10	33.9	5.2	1173		23.7417	2190	6.53072	699.31	1208	898
Sample1740	43.06	42.73	Europe	Georgia:Samegrelo-Zemo Svaneti:Mestia	forest: temperate broadleaf forest biome	Continental	3.42917	8.49167	18.8479	1.2526	17	34.9	5.5	1005		22.2268	1777	6.53072	711.015	1169	933
Sample1741	43.11	42.73	Europe	Georgia:Samegrelo-Zemo Svaneti:Mestia	forest: temperate broadleaf forest biome	Continental	2.825	7.9	21.5107	1.3214	10	37.6	5.5	1245		16.7303	1889	6.53072	702.565	1130	855
Sample1742	43.11	42.74	Europe	Georgia:Samegrelo-Zemo Svaneti:Mestia	forest: temperate coniferous forest biome	Continental	3.27083	8.075	21.8782	1.2891	10	36.2	5.4	1427		15.9331	1736	6.53072	710.414	1110	861
Sample1743	43.06	42.77	Europe	Georgia:Samegrelo-Zemo Svaneti:Mestia	forest: temperate broadleaf forest biome	Continental	4.03333	8.73333	18.8347	1.1886	18	37.2	5.3	1214		13.4893	1831	6.53072	722.305	1116	938
Sample1744	43.06	42.78	Europe	Georgia:Samegrelo-Zemo Svaneti:Mestia	forest: temperate coniferous forest biome	Continental	3.55417	8.59167	18.6255	1.2166	13	35.5	5.8	1071		11.0961	1923	6.53072	715.607	1141	937
Sample1745	43.07	42.79	Europe	Georgia:Samegrelo-Zemo Svaneti:Mestia	grassland: montane grassland biome	Polar/Montane	2.72083	8.29167	20.1581	1.2937	10	33.7	5.3	1242		15.5241	2285	6.53072	709.486	1178	910
Sample1746	43.07	42.8	Europe	Georgia:Samegrelo-Zemo Svaneti:Mestia	grassland: montane grassland biome	Polar/Montane	1.2125	8.05833	20.9434	1.3546	10	34.8	5.2	1011		19.8833	2408	6.53072	703.647	1189	877
Sample1747	43.12	42.6	Europe	Georgia:Samegrelo-Zemo Svaneti:Mestia	forest: temperate coniferous forest biome	Continental	1.74167	7.96667	20.8389	1.396	14	36.2	5.3	967		26.701	2050	6.53072	687.148	1201	860
Sample1748	43.14	42.56	Europe	Georgia:Samegrelo-Zemo Svaneti:Mestia	grassland: montane grassland biome	Polar/Montane	0.4875	7.69167	20.6166	1.4323	14	38.5	5.4	1009		19.0951	2595	6.53072	699.399	1205	841
Sample1749	43.12	42.58	Europe	Georgia:Samegrelo-Zemo Svaneti:Mestia	forest: temperate broadleaf forest biome	Continental	1.87083	7.94167	20.6217	1.3924	14	38.4	5.2	1054		20.9489	2233	6.53072	694.849	1197	859
Sample1750	43	42.62	Europe	Georgia:Samegrelo-Zemo Svaneti:Mestia	forest: temperate broadleaf forest biome	Continental	5.325	9.08333	16.1288	1.126	14	34.4	5.5	891		9.76263	1306	6.64052	718.273	1092	969
Sample1751	42.99	42.62	Europe	Georgia:Samegrelo-Zemo Svaneti:Mestia	forest: temperate broadleaf forest biome	Continental	4.42917	8.575	16.2357	1.1815	10	35.2	5.5	985		16.4068	1625	6.64052	702.157	1153	975
Sample1752	42.98	42.62	Europe	Georgia:Samegrelo-Zemo Svaneti:Mestia	forest: temperate coniferous forest biome	Continental	3.7375	8.19167	15.4013	1.2239	10	32.2	5.1	952		14.6442	2123	6.64052	690.507	1191	973
Sample1753	42.97	42.62	Europe	Georgia:Samegrelo-Zemo Svaneti:Mestia	forest: temperate broadleaf forest biome	Continental	2.6625	7.75833	15.2517	1.2883	13	32.9	5.3	1113		14.6177	2303	6.64052	683.477	1230	954
Sample1754	43.01	42.84	Europe	Georgia:Samegrelo-Zemo Svaneti:Mestia	forest: temperate coniferous forest biome	Continental	4.25	8.53333	17.372	1.1851	14	36.3	5.2	1010		14.4569	1899	6.53072	722.933	1125	949
Sample1755	43	42.85	Europe	Georgia:Samegrelo-Zemo Svaneti:Mestia	forest: temperate coniferous forest biome	Continental	3.26667	7.96667	17.1897	1.2463	14	37.3	5.2	1162		13.1547	2114	6.64052	707.667	1171	939
Sample1756	42.99	42.88	Europe	Georgia:Samegrelo-Zemo Svaneti:Mestia	forest: temperate broadleaf forest biome	Continental	1.85	7.6	18.1226	1.304	10	37.3	5.2	1144		14.2253	2320	6.64052	699.666	1184	907
Sample1757	43	42.54	Europe	Georgia:Samegrelo-Zemo Svaneti:Mestia	forest: temperate broadleaf forest biome	Continental	4.725	8.9	15.9883	1.2499	22	35.2	5.2	1156		12.3684	1320	6.64052	712.287	1192	953
Sample1758	42.98	42.54	Europe	Georgia:Samegrelo-Zemo Svaneti:Mestia	forest: temperate coniferous forest biome	Continental	3.06667	8.08333	16.1074	1.3549	10	36.6	5.1	1000		16.7163	2011	6.64052	700.53	1274	940
Sample1759	42.97	42.53	Europe	Georgia:Samegrelo-Zemo Svaneti:Mestia	grassland: montane grassland biome	Polar/Montane	1.425	7.65	16.9294	1.4103	10	35.8	5.3	1008		23.1776	2619	6.64052	701.468	1281	908
Sample1760	42.98	42.54	Europe	Georgia:Samegrelo-Zemo Svaneti:Mestia	forest: temperate broadleaf forest biome	Continental	3.06667	8.08333	16.1074	1.3549	10	36.6	5.1	1000		16.7163	2011	6.64052	700.53	1274	940
Sample1761	43.05	42.72	Europe	Georgia:Samegrelo-Zemo Svaneti:Mestia	forest: temperate broadleaf forest biome	Continental	5.40417	9.30833	16.7563	1.1211	14	35.7	5.7	940		17.0794	1533	6.53072	747.105	1050	936
Sample1762	43.06	42.72	Europe	Georgia:Samegrelo-Zemo Svaneti:Mestia	forest: temperate broadleaf forest biome	Continental	2.75833	8.31667	18.7989	1.2831	14	30.8	5.3	936		20.3347	1999	6.53072	705.884	1187	925
Sample1763	43.06	42.91	Europe	Georgia:Samegrelo-Zemo Svaneti:Mestia	forest: temperate broadleaf forest biome	Continental	0.420833	7.39167	20.7429	1.3979	10	34.7	5.2	1062		7.61762	2226	6.53072	713.406	1148	821
Sample1764	43.05	42.89	Europe	Georgia:Samegrelo-Zemo Svaneti:Mestia	forest: temperate coniferous forest biome	Continental	3.42917	8.475	19.8448	1.2605	10	37.3	5.5	1208		16.0326	1887	6.53072	735.244	1136	901
Sample1765	43.08	42.72	Europe	Georgia:Samegrelo-Zemo Svaneti:Mestia	grassland: montane grassland biome	Polar/Montane	1.91667	7.96667	20.4607	1.3377	14	39	5.1	1065		26.5352	2134	6.53072	699.03	1195	893
Sample1766	43.1	42.69	Europe	Georgia:Samegrelo-Zemo Svaneti:Mestia	grassland: montane grassland biome	Polar/Montane	-2.06667	7.31667	20.5674	1.5403	14					6.85563	3186	6.53072	695.261	1199	778
Sample1767	43.09	42.7	Europe	Georgia:Samegrelo-Zemo Svaneti:Mestia	grassland: montane grassland biome	Polar/Montane	0.0458333	7.60833	20.5056	1.4386	14	37.1	5.6	1134		19.2551	2987	6.53072	695.484	1207	838
Sample1768	43.09	42.7	Europe	Georgia:Samegrelo-Zemo Svaneti:Mestia	grassland: montane grassland biome	Polar/Montane	0.0458333	7.60833	20.5056	1.4386	14	37.1	5.6	1134		19.2551	2987	6.53072	695.484	1207	838
Sample1769	43.09	42.7	Europe	Georgia:Samegrelo-Zemo Svaneti:Mestia	grassland: montane grassland biome	Polar/Montane	0.0458333	7.60833	20.5056	1.4386	14	37.1	5.6	1134		19.2551	2987	6.53072	695.484	1207	838
Sample1770	43.09	42.67	Europe	Georgia:Samegrelo-Zemo Svaneti:Mestia	grassland: montane grassland biome	Polar/Montane	-0.908333	7.61667	19.879	1.4577	14	36.9	5.3	964		11.1504	3138	6.53072	693.6	1198	821
Sample1771	43.09	42.67	Europe	Georgia:Samegrelo-Zemo Svaneti:Mestia	grassland: montane grassland biome	Polar/Montane	-0.908333	7.61667	19.879	1.4577	14	36.9	5.3	964		11.1504	3138	6.53072	693.6	1198	821
Sample1772	43.07	42.79	Europe	Georgia:Samegrelo-Zemo Svaneti:Mestia	grassland: montane grassland biome	Polar/Montane	2.72083	8.29167	20.1581	1.2937	10	33.7	5.3	1242		15.5241	2285	6.53072	709.486	1178	910
Sample1773	43.08	42.8	Europe	Georgia:Samegrelo-Zemo Svaneti:Mestia	grassland: montane grassland biome	Polar/Montane	0.00833341	7.78333	21.4529	1.4076	10	35.2	5.2	1089		21.6585	2728	6.53072	703.349	1189	844
Sample1774	43.08	42.81	Europe	Georgia:Samegrelo-Zemo Svaneti:Mestia	grassland: montane grassland biome	Polar/Montane	-1.03333	7.65	21.4167	1.4493	10	33.8	5.3	960		19.891	3062	6.53072	704.293	1185	817
Sample1775	43.08	42.82	Europe	Georgia:Samegrelo-Zemo Svaneti:Mestia	grassland: montane grassland biome	Polar/Montane	-1.2375	7.59167	21.7121	1.4754	10	35.1	5.3	899		18.8585	3188	6.53072	703.165	1187	804
Sample1776	43.09	42.81	Europe	Georgia:Samegrelo-Zemo Svaneti:Mestia	grassland: montane grassland biome	Polar/Montane	-2.075	7.31667	21.3069	1.4943	10	36.2	5.5	813		14.6252	3363	6.53072	703.196	1169	782
Sample1777	43.09	42.8	Europe	Georgia:Samegrelo-Zemo Svaneti:Mestia	grassland: montane grassland biome	Polar/Montane	-1.275	7.46667	21.032	1.4456	10	37.2	5.5	904		13.4501	3163	6.53072	704.736	1171	810
Sample1778	43.08	42.78	Europe	Georgia:Samegrelo-Zemo Svaneti:Mestia	grassland: montane grassland biome	Polar/Montane	1.89583	8.05833	20.7584	1.3278	10	31.5	5.2	1145		24.5553	2336	6.53072	706.027	1188	894
Sample1779	42.95	43.1	Europe	Georgia:Samegrelo-Zemo Svaneti:Ushguli	shrubland: montane shrubland biome	Polar/Montane	-1.72083	7.24167	19.8287	1.4829	10	38.5	5.8	880		17.546	2692	6.64052	702.313	1120	755
Sample1678	59.07	27.53	Europe	Estonia:Agusalu	forest: temperate coniferous forest biome	Continental	4.80833	7.8	37.3159	0.8598	13	59.1	5.8	996		0.335609	45	2.60392	885.72	620	721
Sample1679	59.1	27.44	Europe	Estonia:Agusalu	forest: temperate coniferous forest biome	Continental	4.77917	7.79167	37.4454	0.8681	14	56.4	5.5	1188		0.34964	53	2.60392	882.114	623	717
Sample1680	59.07	27.48	Europe	Estonia:Agusalu	forest: temperate coniferous forest biome	Continental	4.79583	7.75833	37.6743	0.8612	9	56.7	5	1958	28.2667	0.405771	54	2.60392	883.53	620	719
Sample1681	59.08	27.49	Europe	Estonia:Agusalu	forest: temperate coniferous forest biome	Continental	4.7625	7.79167	36.9039	0.8675	13	59.2	4.9	1788	29.1015	0.34947	55	2.60392	883.099	623	718
Sample1682	59.06	27.51	Europe	Estonia:Agusalu	forest: temperate coniferous forest biome	Continental	4.7875	7.775	37.078	0.8605	7	60.2	5.2	2227	29.9385	0.182816	46	2.60392	883.552	620	720
Sample1683	59.1	27.42	Europe	Estonia:Agusalu	forest: temperate coniferous forest biome	Continental	4.7375	7.825	37.3883	0.8728	14	56.2	5.2	1433		0.284982	57	2.60392	882.25	625	716
Sample1684	59.1	27.41	Europe	Estonia:Agusalu	forest: temperate coniferous forest biome	Continental	4.73333	7.85	37.1669	0.8692	14	59.9	5.2	1365		0.507683	50	2.60392	882.51	623	716
Sample1685	59.1	27.44	Europe	Estonia:Agusalu	forest: temperate coniferous forest biome	Continental	4.77917	7.79167	37.4454	0.8681	14	56.4	5.5	1188		0.34964	53	2.60392	882.114	623	717
Sample1686	59.08	27.46	Europe	Estonia:Agusalu	forest: temperate coniferous forest biome	Continental	4.77917	7.75833	37.4039	0.8631	10	58.7	5.2	1657	28.3667	0.128933	50	2.60392	883.097	621	719
Sample1687	59.06	27.52	Europe	Estonia:Agusalu	forest: temperate coniferous forest biome	Continental	4.77917	7.79167	37.2376	0.8621	10	58.1	5.2	1888		0.404152	47	2.60392	884.481	621	720
Sample1688	59.08	27.46	Europe	Estonia:Agusalu	forest: temperate coniferous forest biome	Continental	4.77917	7.75833	37.4039	0.8631	10	58.7	5.2	1657	28.3667	0.128933	50	2.60392	883.097	621	719
Sample1689	59.06	27.51	Europe	Estonia:Agusalu	forest: temperate coniferous forest biome	Continental	4.7875	7.775	37.078	0.8605	7	60.2	5.2	2227	29.9385	0.182816	46	2.60392	883.552	620	720
Sample1690	59.06	27.5	Europe	Estonia:Agusalu	forest: temperate coniferous forest biome	Continental	4.78333	7.76667	37.0315	0.8596	7	58.2	4.9	1892	28.8167	0.232869	49	2.60392	883.591	619	720
Sample1691	59.06	27.51	Europe	Estonia:Agusalu	forest: temperate coniferous forest biome	Continental	4.7875	7.775	37.078	0.8605	7	60.2	5.2	2227	29.9385	0.182816	46	2.60392	883.552	620	720
Sample1692	59.08	27.48	Europe	Estonia:Agusalu	forest: temperate coniferous forest biome	Continental	4.77917	7.775	37.3077	0.863	9	60.1	5	1842	30.0125	0.232982	58	2.60392	883.311	621	719
Sample1693	59.1	27.43	Europe	Estonia:Agusalu	forest: temperate coniferous forest biome	Continental	4.74583	7.80833	37.3883	0.8723	14	57.1	5.4	1437		0.0809083	55	2.60392	882.165	625	716
Sample1694	59.06	27.5	Europe	Estonia:Agusalu	forest: temperate coniferous forest biome	Continental	4.78333	7.76667	37.0315	0.8596	7	58.2	4.9	1892	28.8167	0.232869	49	2.60392	883.591	619	720
Sample1695	59.07	27.44	Europe	Estonia:Agusalu	forest: temperate coniferous forest biome	Continental	4.775	7.78333	37.2716	0.8674	10	57.2	4.9	1687		0.205107	48	2.60392	882.359	623	718
Sample1696	57.68	26.6	Europe	Estonia:Karula	forest: temperate coniferous forest biome	Continental	5.55833	7.81667	32.166	0.8843	14	48.2	5.5	1386	29.8616	0.336687	89	2.86536	823.17	652	737
Sample1697	57.67	26.57	Europe	Estonia:Karula	forest: temperate coniferous forest biome	Continental	5.5625	7.80833	31.6196	0.8809	14	44.6	5.4	1121	28.2233	0.218721	81	2.86536	820.926	649	736
Sample1698	57.68	26.6	Europe	Estonia:Karula	forest: temperate coniferous forest biome	Continental	5.55833	7.81667	32.166	0.8843	14	48.2	5.5	1386	29.8616	0.336687	89	2.86536	823.17	652	737
Sample1699	57.67	26.6	Europe	Estonia:Karula	forest: temperate coniferous forest biome	Continental	5.51667	7.85	31.86	0.8855	14	48	5.3	1234		0.272535	91	2.86536	823.108	652	736
Sample1700	57.68	26.55	Europe	Estonia:Karula	forest: temperate coniferous forest biome	Continental	5.55833	7.78333	31.7535	0.8774	14	55.8	5.4	1066	31.3163	0.326555	84	2.86536	819.467	647	737
Sample1701	57.66	26.45	Europe	Estonia:Karula	forest: temperate coniferous forest biome	Continental	5.5375	7.85833	33.1717	0.8798	13	47.8	5	1740	30.3086	0.216739	81	2.87059	815.908	645	733
Sample1702	57.67	26.47	Europe	Estonia:Karula	forest: temperate coniferous forest biome	Continental	5.5625	7.825	33.1382	0.8774	14	45	5.3	1323		0.20492	80	2.87059	816.526	643	732
Sample1703	57.65	26.41	Europe	Estonia:Karula	forest: temperate coniferous forest biome	Continental	5.57083	7.90833	33.7766	0.8793	13	48.6	5.3	1416	30.0376	0.317358	81	2.87059	817.989	643	731
Sample1704	57.64	26.41	Europe	Estonia:Karula	forest: temperate coniferous forest biome	Continental	5.55833	7.96667	33.2213	0.875	13	47.5	5.3	1588	32.1572	0.98139	78	2.87059	818.624	641	732
Sample1705	57.65	26.5	Europe	Estonia:Karula	forest: temperate coniferous forest biome	Continental	5.55833	7.88333	33.0181	0.8776	14	50.6	5.1	1648	29.8547	0.19963	88	2.86536	818.243	646	736
Sample1706	57.65	26.5	Europe	Estonia:Karula	forest: temperate coniferous forest biome	Continental	5.55833	7.88333	33.0181	0.8776	14	50.6	5.1	1648	29.8547	0.19963	88	2.86536	818.243	646	736
Sample1707	57.67	26.47	Europe	Estonia:Karula	forest: temperate coniferous forest biome	Continental	5.5625	7.825	33.1382	0.8774	14	45	5.3	1323		0.20492	80	2.87059	816.526	643	732
Sample1708	57.67	26.47	Europe	Estonia:Karula	forest: temperate coniferous forest biome	Continental	5.5625	7.825	33.1382	0.8774	14	45	5.3	1323		0.20492	80	2.87059	816.526	643	732
Sample1709	57.69	26.48	Europe	Estonia:Karula	forest: temperate coniferous forest biome	Continental	5.50833	7.73333	33.0037	0.8777	14	56.1	5.2	1349	28.6339	0.29487	96	2.87059	814.906	644	733
Sample1710	57.67	26.56	Europe	Estonia:Karula	forest: temperate coniferous forest biome	Continental	5.575	7.81667	31.7011	0.8783	14	50.9	5.4	1329		0.231871	80	2.86536	820.641	648	737
Sample1711	57.67	26.51	Europe	Estonia:Karula	forest: temperate coniferous forest biome	Continental	5.54167	7.8	32.7353	0.8733	14	52.5	5.2	1489		0.64677	88	2.86536	818.354	644	737
Sample1712	57.66	26.52	Europe	Estonia:Karula	forest: temperate coniferous forest biome	Continental	5.575	7.81667	31.976	0.8777	14	52.1	5.4	1235		0.138941	79	2.86536	819.317	646	736
Sample1713	57.67	26.47	Europe	Estonia:Karula	forest: temperate coniferous forest biome	Continental	5.5625	7.825	33.1382	0.8774	14	45	5.3	1323		0.20492	80	2.87059	816.526	643	732
Sample1714	57.95	27.34	Europe	Estonia:Meenikunno	forest: temperate coniferous forest biome	Continental	5.44167	7.75	34.2039	0.8371	21	54.9	5.3	1050		0.218455	75	2.86013	860.705	626	747
Sample1715	57.92	27.33	Europe	Estonia:Meenikunno	forest: temperate coniferous forest biome	Continental	5.45417	7.84167	34.7791	0.8376	13	58.7	5	1284	32.0917	0.419642	83	2.86013	863.527	628	749
Sample1716	57.94	27.35	Europe	Estonia:Meenikunno	forest: temperate coniferous forest biome	Continental	5.45	7.75	34.4101	0.8347	10	57.7	5.7	1228	32.4225	0.0618165	77	2.86013	857.6	626	749
Sample1717	57.94	27.35	Europe	Estonia:Meenikunno	forest: temperate coniferous forest biome	Continental	5.45	7.75	34.4101	0.8347	10	57.7	5.7	1228	32.4225	0.0618165	77	2.86013	857.6	626	749
Sample1718	57.94	27.4	Europe	Estonia:Meenikunno	forest: temperate coniferous forest biome	Continental	5.47083	7.69167	34.2415	0.8362	17	64.3	5	1470	31.3933	0.338942	65	2.86013	855.797	626	748
Sample1719	57.92	27.38	Europe	Estonia:Meenikunno	forest: temperate coniferous forest biome	Continental	5.46667	7.63333	34.3978	0.834	9	59.9	5	1467	35.3677	0.128138	68	2.86013	851.622	624	748
Sample1720	57.93	27.41	Europe	Estonia:Meenikunno	forest: temperate coniferous forest biome	Continental	5.44583	7.70833	34.1314	0.8348	12	62.9	5	1298	32.9583	0.247217	67	2.86013	855.298	625	748
Sample1721	57.96	27.28	Europe	Estonia:Meenikunno	forest: temperate coniferous forest biome	Continental	5.425	7.81667	34.6059	0.8413	17	54.2	5.5	1320		0.323797	69	2.86013	862.711	626	744
Sample1722	57.94	27.3	Europe	Estonia:Meenikunno	forest: temperate coniferous forest biome	Continental	5.46667	7.86667	33.8666	0.8402	13	57.6	5.9	1208	33.3919	0.589857	70	2.86013	864.329	628	747
Sample1723	57.96	27.32	Europe	Estonia:Meenikunno	forest: temperate coniferous forest biome	Continental	5.45	7.8	34.3857	0.8369	13	48.7	5.3	1021	30.7146	0.347661	67	2.86013	861.985	625	746
Sample1724	57.95	27.37	Europe	Estonia:Meenikunno	forest: temperate coniferous forest biome	Continental	5.45	7.73333	34.2564	0.8314	13	53.8	5.1	1483	32.0282	0.0579682	71	2.86013	857.92	624	749
Sample1725	57.94	27.29	Europe	Estonia:Meenikunno	forest: temperate coniferous forest biome	Continental	5.47083	7.875	34.2363	0.8415	13	57.5	6.4	718	32.3007	0.115936	70	2.86013	864.642	629	747
Sample1780	67.58	18.1	Europe	Sweden:Stora Sj?allet	tundra biome	Continental	-0.0875001	6.99167	29.0398	1.139	1	53.1	5.2	1578			582	2.32157	822.013	599	525
Sample1781	67.64	17.82	Europe	Sweden:Stora Sj?allet	tundra biome	Continental	-0.133333	6.93333	28.5225	1.0902	1	56.1	5			12.2226	623	2.39477	799.353	570	522
Sample1782	67.77	17.33	Europe	Sweden:Stora Sj?allet	tundra biome	Polar/Montane	-1.14583	6.34167	24.2475	1.2908	5	53.1	5.6	1767		7.76172	767	2.31634	756.488	617	477
Sample1783	67.75	17.38	Europe	Sweden:Stora Sj?allet	tundra biome	Continental	-0.816667	6.55	25.8585	1.1698	5	54.5	5.5	1807		5.99633	734	2.31634	764.295	576	492
Sample1784	67.73	17.42	Europe	Sweden:Stora Sj?allet	tundra biome	Continental	-0.404167	6.64167	28.8147	1.0466	5	54.5	5.3	1931		4.65637	656	2.31634	773.641	536	512
Sample1785	67.73	17.45	Europe	Sweden:Stora Sj?allet	tundra biome	Continental	-0.3	6.7	29.0816	1.0137	5	52.9	5.3	1974		6.94391	659	2.31634	782.115	527	519
Sample1786	67.69	17.72	Europe	Sweden:Stora Sj?allet	tundra biome	Polar/Montane	-3.34583	6.10833	23.3426	1.9131	1	50.1	5.7	1845		3.23139	1361	2.39477	711.722	778	406
Sample1787	67.69	17.7	Europe	Sweden:Stora Sj?allet	tundra biome	Polar/Montane	-3.05833	6.16667	22.7843	1.7933	1	49.2	5.6	1720			1183	2.39477	715.751	752	419
Sample1788	67.69	17.67	Europe	Sweden:Stora Sj?allet	tundra biome	Polar/Montane	-1.83333	6.33333	24.5619	1.4364	1	49.7	5.6	1682		15.2431	944	2.39477	736.257	659	458
Sample1789	67.69	17.64	Europe	Sweden:Stora Sj?allet	tundra biome	Continental	-0.8875	6.55833	26.9492	1.1549	1	54.1	5.3	1655		12.5505	710	2.39477	759.133	584	505
Sample1790	67.69	17.63	Europe	Sweden:Stora Sj?allet	tundra biome	Continental	-0.725	6.58333	27.3465	1.1371	1	54.5	5.3	1629		10.2587	680	2.39477	761.982	570	501
Sample1791	67.68	17.6	Europe	Sweden:Stora Sj?allet	tundra biome	Continental	0.1125	6.75833	29.3289	1.0341	5	57.2					464	2.39477	781.828	539	521
Sample1792	67.64	17.79	Europe	Sweden:Stora Sj?allet	forest: subpolar coniferous forest biome	Continental	-0.0166667	6.96667	30.3271	1.081	1					7.38738	472	2.39477	801.551	556	514
Sample1793	67.59	17.5	Europe	Sweden:Stora Sj?allet	tundra biome	Polar/Montane	-4.9	5.88333	26.0107	2.9392	4	47.6	5.7	2325		13.2167	1687	2.39477	694.036	872	296
Sample1794	67.6	17.49	Europe	Sweden:Stora Sj?allet	tundra biome	Polar/Montane	-4.47917	5.975	27.0647	2.3682	4	48	5.6	2287		9.76869	1426	2.31634	702.937	814	343
Sample1795	67.6	17.46	Europe	Sweden:Stora Sj?allet	tundra biome	Polar/Montane	-3.80833	6.18333	28.7692	2.0885	4	46	5.6	2048		19.6819	1181	2.31634	716.665	747	357
Sample1796	67.61	17.45	Europe	Sweden:Stora Sj?allet	tundra biome	Polar/Montane	-2.69583	6.35833	28.0569	1.4591	4	52	5.5	1808		14.9489	899	2.31634	742.687	626	429
Sample1797	67.61	17.43	Europe	Sweden:Stora Sj?allet	tundra biome	Polar/Montane	-2.425	6.46667	28.2894	1.3917	4	52.8	5.6	1797		19.7301	1047	2.31634	753.656	614	441
Sample1798	67.62	17.37	Europe	Sweden:Stora Sj?allet	tundra biome	Continental	-0.295833	7.025	31.1555	1.0214	4	52	5.4	1961		3.66057	493	2.31634	824.054	531	519
Sample1799	67.88	18.83	Europe	Sweden:Nikkaluokta	tundra biome	Polar/Montane	-3.85417	7.90833	29.8556	1.8056	9	52	5.5	2081		6.08935	1263	2.28497	837.042	704	389
Sample1800	67.88	18.85	Europe	Sweden:Nikkaluokta	tundra biome	Polar/Montane	-3.25	8.38333	32.86	1.4928	9	52.3	5.5	1841		10.4466	1155	2.28497	870.614	625	418
Sample1801	67.87	18.88	Europe	Sweden:Nikkaluokta	tundra biome	Polar/Montane	-2.90833	8.73333	33.3559	1.3553	9	52.8	5.3	1704		11.3597	954	2.28497	899.398	599	441
Sample1802	67.87	18.91	Europe	Sweden:Nikkaluokta	tundra biome	Continental	-2.64583	9.14167	33.2847	1.2393	9	53.4	5.1	1711		9.34352	707	2.28497	928.213	576	464
Sample1803	67.86	18.93	Europe	Sweden:Nikkaluokta	tundra biome	Continental	-2.3125	9.725	34.6654	1.1422	9	52.2	4.8	1888		6.51355	571	2.28497	966.642	536	469
Sample1804	68.35	18.96	Europe	Sweden:Abisko	tundra biome	Continental	-0.833333	8.13333	43.006	0.6754	17	53.2	5.6	2002		1.26032	362	2.25882	882.85	355	525
Sample1805	68.45	18.6	Europe	Sweden:Abisko	tundra biome	Continental	-0.791667	7.63333	29.8987	1.0798	9	54.1	5.3	2265		0.797619	405	2.25882	861.396	520	478
Sample1806	68.36	18.68	Europe	Sweden:Abisko	tundra biome	Polar/Montane	-2.98333	7.18333	25.1697	1.5512	5	52	5.5	1987		6.32499	1086	2.25882	774.686	676	435
Sample1807	68.35	18.7	Europe	Sweden:Abisko	tundra biome	Continental	-1.90833	7.7	27.0796	1.1806	13	52.9	5.6	1652			952	2.25882	834.031	548	464
Sample1808	68.36	18.73	Europe	Sweden:Abisko	tundra biome	Polar/Montane	-1.78333	7.56667	30.0734	1.0914	17	51.1	5.5	1648		20.8095	752	2.25882	807.812	525	481
Sample1809	68.36	18.74	Europe	Sweden:Abisko	tundra biome	Continental	-1.325	7.65	34.3257	0.9225	17	50.9	5.3	1719		19.3023	596	2.25882	825.149	455	493
Sample1810	68.4	18.36	Europe	Sweden:Abisko	tundra biome	Polar/Montane	-2.95833	6.53333	23.6504	2.1953	17	52.2	5.4	1876		12.5813	1213	2.23791	746.54	781	375
Sample1811	68.38	18.38	Europe	Sweden:Abisko	tundra biome	Polar/Montane	-3.70833	6.4	22.6449	2.2423	5	50.2	5.6	1996		2.93755	1379	2.23791	715.573	853	380
Sample1812	68.39	18.45	Europe	Sweden:Abisko	tundra biome	Polar/Montane	-3.8875	6.40833	23.5287	2.3551	13	52	5.7	2125		8.84539	1220	2.23791	711.861	844	358
Sample1813	68.41	18.46	Europe	Sweden:Abisko	tundra biome	Polar/Montane	-3.35417	6.54167	24.2246	1.9827	17	53.4	5.5	1866		11.9916	1289	2.23791	743.051	793	399
Sample1814	68.41	18.43	Europe	Sweden:Abisko	tundra biome	Polar/Montane	-3.325	6.53333	23.5837	1.9921	17	51.7	5.5	1981		7.31829	1240	2.23791	743.519	801	402
Sample1815	68.42	18.38	Europe	Sweden:Abisko	tundra biome	Polar/Montane	-2.125	6.78333	25.0654	1.614	17	54	5.6	1736		13.756	782	2.23791	778.479	722	447
Sample1816	68.42	18.41	Europe	Sweden:Abisko	tundra biome	Polar/Montane	-2.30417	6.775	25.2235	1.6832	17	53	5.1	1874		16.6819	906	2.23791	775.967	724	430
Sample1817	68.16	17.59	Europe	Norway:Narvik	forest: subpolar coniferous forest biome	Continental	0.8875	6.64167	27.2461	1.3249	21	55.8	5	1829		14.1465	258	2.21699	763.202	688	519
Sample1818	68.16	17.68	Europe	Norway:Narvik	tundra biome	Continental	-0.395833	6.325	26.5693	1.5764	13	55.8	5	1618		20.8472	515	2.21699	737.494	718	455
Sample1952	48.81	14.31	Europe	Czech Republic:?esk?Krumlov	forest: temperate broadleaf forest biome	Continental	7.79583	9.14167	25.806	0.9753	56				33.5862	3.09133	547	4.59085	712.577	807	827
Sample1953	48.94	14.78	Europe	Czech Republic:Nov?Hrady	forest: temperate broadleaf forest biome	Continental	7.775	9.03333	34.5858	0.7852	14	42.6	5.9	480	35.5688	0.310249	459	4.58039	720.144	652	830
Sample1954	48.79	14.78	Europe	Czech Republic:Nov?Hrady	forest: temperate broadleaf forest biome	Continental	7.35833	9.15	32.8193	0.8707	14	41		554	32.9739	2.5114	514	4.58039	711.742	706	810
Sample1955	49.98	16.99	Europe	Czech Republic:Velk?Losiny	forest: temperate broadleaf forest biome	Continental	7.40417	8.34167	46.6647	0.7264	46	22.4	6.1	654	34.5453	2.95929	365	4.3085	718.785	598	823
Sample1956	50.02	17.03	Europe	Czech Republic:Velk?Losiny	forest: temperate broadleaf forest biome	Continental	7.22917	8.20833	47.212	0.7506	39	21.3	5.4	567	35.5908	0.699239	376	4.13595	714.704	609	811
Sample1957	49.71	16.99	Europe	Czech Republic	unknown	Continental	8.07083	8.40833	47.0285	0.6405	30	19.3	6.8	562	33.1778	2.07008	284	4.3085	728.112	556	867
Sample1958	49.71	17.02	Europe	Czech Republic:B??Lhota	forest: temperate broadleaf forest biome	Continental	8.35833	8.61667	46.9328	0.6215	22	16.2	5.8	647	35.2692	0.195653	255	4.31896	732.973	548	881
Sample1959	49.71	16.99	Europe	Czech Republic:B??Lhota	forest: temperate broadleaf forest biome	Continental	8.07083	8.40833	47.0285	0.6405	30	19.3	6.8	562	33.1778	2.07008	284	4.3085	728.112	556	867
Sample1960	49.53	17.5	Europe	Czech Republic:Vesel?ko	forest: temperate broadleaf forest biome	Continental	8.23333	8.73333	43.7402	0.7119	38	14.9	6.4	555	35.0419	2.23517	294	4.30327	739.574	629	883
Sample1961	49.53	17.51	Europe	Czech Republic:Vesel?ko	forest: temperate broadleaf forest biome	Continental	8.35833	8.78333	44.0118	0.7009	38	14.7	6.7	508	32.996	3.28236	273	4.30327	740.933	622	887
Sample1963	49.72	18.27	Europe	Czech Republic:Paskov	forest: temperate broadleaf forest biome	Continental	8.33333	9.06667	43.143	0.8188	42	22.4	5.2	623	27.881	0.900549	276	4.35556	731.746	717	875
Sample1964	49.73	18.3	Europe	Czech Republic:Paskov	forest: temperate broadleaf forest biome	Continental	8.49583	9.15833	42.8105	0.8063	42					1.47977	253	4.35556	734.183	711	881
Sample1965	49.97	17.79	Europe	Czech Republic:Velk?Heraltice	forest: temperate broadleaf forest biome	Continental	7.97917	8.675	44.5776	0.7664	26	13.3	5.6	500	34.7178	0.887417	308	4.30327	713.297	652	850
Sample1966	49.97	17.74	Europe	Czech Republic:Velk?Heraltice	forest: temperate broadleaf forest biome	Continental	7.75833	8.45	45.0855	0.7905	26	20.8	6.3	394	32.8203	0.924899	347	4.30327	709.212	660	834
Sample1967	49.31	17.39	Europe	Czech Republic:Krom???	forest: temperate broadleaf forest biome	Continental	8.95417	9.14167	43.8998	0.6276	50	25.6	6.7	503	30.0038	0.330985	194	4.41307	747.993	592	943
Sample1968	49.21	17.42	Europe	Czech Republic:Krom???	forest: temperate broadleaf forest biome	Continental	8.15	8.16667	40.8769	0.7139	26	20.8	5.2	428	34.6807	1.54972	357	4.41307	731.53	648	907
Sample1969	49.03	17.8	Europe	Czech Republic:Nov?Sv?tlov	forest: temperate broadleaf forest biome	Continental	8.3125	9.175	36.5111	0.7259	47	22.3	6.2	558	36.1251	0.611222	275	4.4549	743.991	666	917
Sample1970	49.03	17.79	Europe	Czech Republic:Nov?Sv?tlov	forest: temperate broadleaf forest biome	Continental	8.45	9.21667	36.9993	0.7108	34	23.3	6	609	35.6952	0.487564	304	4.4549	745.639	657	924
Sample1971	48.81	16.81	Europe	Czech Republic:Lednice	forest: temperate broadleaf forest biome	Continental	9.80833	8.83333	39.9727	0.5583	26			443	30.2006	0.358769	163	4.39216	775.039	576	1031
Sample1972	48.81	16.84	Europe	Czech Republic:Lednice	forest: temperate broadleaf forest biome	Continental	9.82083	8.875	40.6049	0.5623	26	35.9	6.4	442	33.7696	0.242065	162	4.39216	775.61	581	1033
Sample1974	50.14	8.27	Europe	Germany:Taunus	forest: temperate broadleaf forest biome	Continental	8.75833	7.16667	12.1587	0.8738	18	22.6	5.5	715	42.4377	3.41828	424	4.1464	638.495	739	845
Sample1975	34.78	32.4	Europe	Cyprus:Paphos	shrubland: temperate shrubland biome	Temperate	18.8417	9.05	98.0536	0.222						2.20252	19	6.96994	522.872	399	1796
Sample1992	50.01	12.61	Europe	Czech Republic:Kyn?art	forest: temperate broadleaf forest biome	Continental	6.35833	7.68333	28.1497	0.9291	26	46.2	6.1	728	39.354	3.65637	619	4.32418	670.41	690	742
Sample1993	49.99	12.63	Europe	Czech Republic:Kyn?art	forest: temperate broadleaf forest biome	Continental	6.65	8	30.6582	0.8552	30	45	6	713	42.5868	0.92741	608	4.44967	679	642	750
Sample1994	49.86	13.76	Europe	Czech Republic:Zbiroh	forest: temperate broadleaf forest biome	Continental	7.6625	8.34167	31.3189	0.7809	18				32.4569	3.45748	494	4.37647	712.764	645	825
Sample1996	49.83	13.8	Europe	Czech Republic:Zbiroh	forest: temperate broadleaf forest biome	Continental	7.67083	8.59167	31.678	0.7727	30	33.4	5	518	32.3652	1.98669	453	4.37647	717.025	640	828
Sample1997	50.2	14.84	Europe	Czech Republic:Lys?nad Labem	forest: temperate broadleaf forest biome	Continental	9.525	8.4	48.5208	0.5461	47					0.558075	181	4.21438	720.197	505	924
Sample1998	50.19	14.86	Europe	Czech Republic:Lys?nad Labem	forest: temperate broadleaf forest biome	Continental	9.5375	8.49167	48.2608	0.5418	47	45.5	6.7	522	23.9631	0.178559	177	4.21438	721.501	501	924
Sample1999	50.14	14.58	Europe	Czech Republic:Vino?	forest: temperate broadleaf forest biome	Continental	9.33333	8.38333	47.6593	0.5343	46	19			31.7822	0.994655	251	4.21438	717.3	498	931
Sample2000	50.13	14.58	Europe	Czech Republic:Vino?	forest: temperate broadleaf forest biome	Continental	9.25833	8.41667	47.3649	0.5345	58	17.3	6.5	616	28.3065	0.561414	278	4.21438	717.999	499	933
Sample2001	49.05	14.44	Europe	Czech Republic:Hlubok?nad Vltavou	forest: temperate broadleaf forest biome	Continental	8.63333	9.05	30.1231	0.7655	50	37	6.1	428	36.6542	1.02741	392	4.47582	733.077	665	868
Sample2002	49.05	14.51	Europe	Czech Republic:Hlubok?nad Vltavou	forest: temperate broadleaf forest biome	Continental	8.1875	9.075	30.6254	0.7924	38	42.8	4.9	454	39.6188	1.26796	481	4.46536	726.383	688	868
Sample2003	50.4	14.05	Europe	Czech Republic:Libochovice	forest: temperate broadleaf forest biome	Continental	9.29583	8.84167	38.852	0.6223	34	24.1	6.8	464	31.3303	1.97851	172	4.19346	724.812	560	899
Sample2004	50.41	14.12	Europe	Czech Republic:Libochovice	forest: temperate broadleaf forest biome	Continental	9.475	8.63333	39.4085	0.6127	34	31.7	5.4	591	29.8176	1.56271	179	4.19346	722.871	557	909
Sample2005	50.45	14.16	Europe	Czech Republic:Doksany	forest: temperate broadleaf forest biome	Continental	9.51667	8.51667	40.0235	0.6187	30	32.9	5.3	704	29.9123	0.221116	159	4.19346	722.773	562	908
Sample2006	30.34	119.43	Europe	China:ZJ:Tianmushan	forest: temperate coniferous forest biome	Continental	11.3708	7.275	49.1801	1.7082	14	38.8	5.3	635	39.01	13.1395	1015	8.54902	814.085	1588	929
Sample2007	50.44	14.16	Europe	Czech Republic:Doksany	forest: temperate broadleaf forest biome	Continental	9.52083	8.525	39.7668	0.6162	30	31.8	6.8	553	28.1172	0.959638	159	4.19346	722.491	561	910
Sample2008	49.74	14.79	Europe	Czech Republic:Jemni??	forest: temperate broadleaf forest biome	Continental	8.24167	8.3	43.6902	0.6113	34	41.5	6.4	590	36.3511	0.928493	441	4.36601	720.309	539	881
Sample2009	49.71	14.89	Europe	Czech Republic:Vla?m	forest: temperate broadleaf forest biome	Continental	8.53333	8.45	45.5026	0.5896	50				32.7527	1.60624	392	4.36601	730.627	528	895
Sample2010	49.72	14.83	Europe	Czech Republic:Vla?m	forest: temperate broadleaf forest biome	Continental	8.40417	8.30833	44.3005	0.5908	26	42.4	5.4	369	29.1839	4.35405	395	4.36601	723.669	531	898
Sample2037	37.59	-1.08	Europe	Spain:Cartagena	forest: mediterranean forest biome	Arid	17.5458	11.0083	45.3861	0.168	18	30.1	7.4	439	16.6892	11.9206	89	6.39477	554.266	284	1689
Sample2039	38.3	-0.72	Europe	Spain:Elche	shrubland: subtropical shrubland biome	Arid	17.5042	11.1083	44.2268	0.1933	50	32	7.9	251	15.1722	1.82053	157	6.24313	563.59	325	1681
Sample2051	52.71	23.82	Europe	Poland:Pogorzelce	forest: temperate broadleaf forest biome	Continental	6.56667	7.9	32.2847	0.767	30	61.8	5.8	1124	32.0443	0.0289841	154	3.6549	768.468	592	771
Sample2072	56.08	-4.56	Europe	Scotland:Inchcailloch	forest: temperate broadleaf forest biome	Temperate	8.75417	5.725	30.5533	1.9761	18	62.1	4.6	2258	15.5261	1.03908	13	3.26797	383.456	1337	676
Sample2079	54.01	51.69	Europe	Russia:Samara oblast:Staryi Shungut	forest: temperate broadleaf forest biome	Continental	3.725	9.16667	29.1209	0.5533	25	28.6	6	564		2.34963	230	3.45621	1239.66	518	936
Sample2092	49.02	13.48	Europe	Czech Republic:Sumava NP	forest: temperate coniferous forest biome	Continental	4.75417	7.60833	20.6195	1.8499	14	34.5	4.8	1328		3.24305	1036	4.51765	646.801	1323	715
Sample2103	49.12	13.24	Europe	Czech Republic:Sumava NP	forest: temperate broadleaf forest biome	Continental	5.79583	8.15833	20.1023	1.5256	39	38.7	4.9	1149	30.89	3.49376	814	4.51765	656.276	1126	738
Sample2109	50	11.85	Europe	Germany:Fichtelberg	forest: temperate broadleaf forest biome	Continental	6.1625	7.375	14.9838	1.5533	43				38.5153	3.04629	682	4.39216	666.825	1099	707
Sample2110	44.39	10.1	Europe	Italy:Valditacca	forest: temperate broadleaf forest biome	Continental	8.5875	8.175	31.7204	1.7359	18	36.6	6.2	957	41.2473	5.69957	1048	5.15556	631.312	1644	947
Sample2111	53.18	13.82	Europe	Germany:Schorfheide-Chorin	forest: temperate broadleaf forest biome	Continental	8.6375	7.875	29.1942	0.631	22	65.3	5.1	733	36.4962	1.25278	65	3.41961	684.049	520	823
Sample2112	46.37	11.35	Europe	Italy:Aldino	forest: temperate broadleaf forest biome	Continental	7.4625	8.425	45.0703	0.6212	18	42.1	6.4	770	32.795	4.84666	1099	6.06537	683.125	582	936
Sample2113	55.04	12.26	Europe	Denmark:M?	forest: temperate broadleaf forest biome	Continental	8.71667	3.73333	19.2745	0.748	8				38.986	0.237325	2	3.10065	608.972	568	759
Sample2114	57.01	-2.85	Europe	Scotland:Glen Tanar	forest: temperate coniferous forest biome	Temperate	6.36667	7.21667	22.0574	1.4729	18	70.4	4.3	2821	25.6231	10.1484	450	2.8549	440.621	929	630
Sample2115	51.58	10.09	Europe	Germany:G?tingen	forest: temperate coniferous forest biome	Continental	8.30833	7.68333	12.4296	0.9519	26	33.6	5.2	718	37.0214	2.23852	275	3.83268	620.523	764	802
Sample2116	42.08	12.09	Europe	Italy:Manziano	forest: mediterranean forest biome	Temperate	14.475	8.26667	40.9406	0.1582	26	29.1	6.7	734	41.9803	1.1068	270	5.72549	616.613	205	1295
Sample2117	65.25	21.59	Europe	Sweden:Pite?40		Continental	2.74583	7.29167	28.8945	0.8329	34	60	4.5	2112		0.534708	10	1.92418	893.406	519	623
Sample2118	48.41	11.7	Europe	Germany:Freising	forest: temperate coniferous forest biome	Continental	7.81667	8.71667	32.8222	0.976	42	34	5.4	535	31.461	0.841611	484	4.64837	684.578	809	828
Sample2119	42.11	12.1	Europe	Italy:Manziano	forest: mediterranean forest biome	Temperate	14.0625	8.10833	37.3439	0.1335	18	28.4	6.8	923	42.158	1.81558	350	5.72549	624.012	172	1288
Sample2120	43.08	11.2	Europe	Italy:Belagaio	forest: mediterranean forest biome	Temperate	12.7708	7.475	28.459	0.5713	18	32.6	6.1	779	37.044	5.00638	414	5.41699	598.481	680	1190
Sample2121	53.18	13.82	Europe	Germany:Schorfheide-Chorin	forest: temperate broadleaf forest biome	Continental	8.6375	7.875	29.1942	0.631	22	65.3	5.1	733	36.4962	1.25278	65	3.41961	684.049	520	823
Sample2122	56.01	12.09	Europe	Denmark:Auder?	forest: temperate broadleaf forest biome	Continental	7.8625	5.19167	23.5914	0.8242	22					0.335258	6	3.01176	660.148	575	697
Sample2123	50.01	11.87	Europe	Germany:G?tingen	forest: temperate coniferous forest biome	Continental	5.70417	7.04167	15.4618	1.6227	43	22.5	4.6	833	27.9021	2.90224	715	4.2719	658.074	1130	696
Sample2124	50	11.85	Europe	Germany:Fichtelberg	forest: temperate coniferous forest biome	Continental	6.1625	7.375	14.9838	1.5533	43				38.5153	3.04629	682	4.39216	666.825	1099	707
Sample2125	57.21	-3.62	Europe	Scotland:Abernethy forest	forest: temperate coniferous forest biome	Temperate	6.67917	7.29167	23.3875	1.4978	16	80.9	4.3	2880	32.3983	1.02616	310	2.9281	433.277	944	630
Sample2126	57.15	14.77	Europe	Sweden:Asa	forest: temperate coniferous forest biome	Continental	5.83333	7.73333	21.4989	0.979	22	60	4.4	1430	29.5355	2.79002	244	2.99608	684.169	691	705
Sample2127	59.83	17.62	Europe	Sweden:Uppsala	forest: temperate coniferous forest biome	Continental	5.8125	7.89167	29.7789	0.7693	56	40.6	5.4	1004		1.06359	40	2.54117	753.326	573	744
Sample2128	62.46	17.48	Europe	Sweden:Sundsvall	forest: temperate broadleaf forest biome	Continental	3.82917	8.54167	26.9467	0.8935	42	43.8	4.6	1941		0.683041	4	2.30588	826.47	573	641
Sample2129	66.61	26.02	Europe	Finland:Rovaniemi	forest: temperate broadleaf forest biome	Continental	0.420833	7.44167	30.3605	0.9842	11	65.7	4.8	1982		1.03361	168	1.93987	975.683	568	577
Sample2130	64.24	19.77	Europe	Sweden:Vindeln	forest: subpolar coniferous forest biome	Continental	1.84167	9	34.1151	1.0007	10	48.9	4.6	2349		1.68587	202	2.14902	916.597	602	601
Sample2131	60.89	14.38	Europe	Sweden:Siljanfors	forest: subpolar coniferous forest biome	Continental	3.75417	9.475	34.0015	0.9616	27	54.9	4.8	1834	29.1533	1.17583	227	2.71895	822.978	632	657
Sample2132	53.2	13.87	Europe	Germany:Schorfheide-Chorin	forest: temperate coniferous forest biome	Continental	8.825	7.66667	29.7532	0.5971	22					0.202036	17	3.41961	679.774	495	828
Sample2133	64.25	19.77	Europe	Sweden:Vindeln	forest: subpolar coniferous forest biome	Continental	1.70833	8.93333	34.6175	1.0254	10	54.2	4.6	1999		2.45822	241	2.14902	910.988	609	593
Sample2134	53.17	13.84	Europe	Germany:Schorfheide-Chorin	forest: temperate coniferous forest biome	Continental	8.75	7.88333	28.907	0.6144	14	69.2	6.1	620	36.575	0.739627	25	3.41961	683.593	512	833
Sample2135	51.43	10.02	Europe	Germany:G?tingen	forest: temperate broadleaf forest biome	Continental	8.14167	7.68333	12.4295	1.002	26	23.5	5.3	616	44.3275	0.507225	340	3.98431	620.977	806	804
Sample2136	57.26	-4.98	Europe	Scotland:Glen Affric	forest: temperate coniferous forest biome	Temperate	7.05833	6.91667	36.365	3.7335	16	78.4	4.4	2492	27.7283	1.66548	236	3.04837	414.256	2253	603
Sample2137	69.46	30.04	Europe	Norway:Svanhovd	forest: subpolar coniferous forest biome	Continental	-0.245833	6.675	34.9071	0.9695	27	61.4	4.8	2206			34	1.58431	878.111	490	505
Sample2138	51.46	9.99	Europe	Germany:G?tingen	forest: temperate broadleaf forest biome	Continental	8.54167	7.83333	14.2813	0.8829	22	34.2	5.1	706	37.6917	2.76735	272	3.97386	620.142	713	807
Sample2139	48.41	11.69	Europe	Germany:Freising	forest: temperate broadleaf forest biome	Continental	7.85	8.76667	33.1313	0.9679	18	32.8	5.9	472	33.1486	1.07848	491	4.64837	685.731	800	826
Sample2140	46.41	11.5	Europe	Italy:Aldino	forest: temperate coniferous forest biome	Continental	7.03333	8.18333	46.4425	0.7055	18	45.3	5.8	790	31.8514	3.17602	1122	5.93987	676.305	646	915
Sample2141	46.37	11.36	Europe	Italy:Aldino	forest: temperate coniferous forest biome	Continental	7.04583	8.225	45.5635	0.6155	18	44.5	6.3	793	33.6403	7.02446	1288	6.06537	675.474	572	929
Sample2147	56.68	-4.33	Europe	Scotland:Black wood of Rannoch	forest: temperate coniferous forest biome	Temperate	7.04583	6.19167	33.1808	2.6766	22					0.782522	211	3.11634	416.285	1545	577
Sample2157	57.01	-3.47	Europe	Scotland:Braemar	forest: temperate coniferous forest biome	Temperate	6.1125	7.525	26.9709	1.7387	18	74.9	4.5	3090	32.9214	9.70355	484	2.88627	452.413	1031	592
Sample2167	50.14	8.27	Europe	Germany:Taunus	forest: temperate broadleaf forest biome	Continental	8.75833	7.16667	12.1587	0.8738	18	22.6	5.5	715	42.4377	3.41828	424	4.1464	638.495	739	845
Sample2178	50.14	8.27	Europe	Germany:Taunus	forest: temperate broadleaf forest biome	Continental	8.75833	7.16667	12.1587	0.8738	18	22.6	5.5	715	42.4377	3.41828	424	4.1464	638.495	739	845
Sample2179	37.91	14.66	Europe	Italy:Messina:Portella dell'Obolo	forest: temperate broadleaf forest biome	Temperate	9.9375	6.15833	53.7707	0.5542	22	40.2	6.4	803	43.0239	5.30143	1372	6.20654	596.353	668	1205
Sample2182	38.02	13.19	Europe	Italy:Sicily:Punte di Cuti	forest: mediterranean forest biome	Temperate	12.9792	6.65833	53.2467	0.4498	22	35.9	6.8	614	35.5347	4.79272	969	6.00785	617.625	605	1344
Sample2183	38.02	13.19	Europe	Italy:Sicily:Punte di Cuti	forest: mediterranean forest biome	Temperate	12.9792	6.65833	53.2467	0.4498	22	35.9	6.8	614	35.5347	4.79272	969	6.00785	617.625	605	1344
Sample2190	37.9	14.5	Europe	Italy:Messina:Portella dell'Obolo	forest: temperate broadleaf forest biome	Temperate	9.62083	5.99167	53.882	0.561	14	39.7	6.1	857	43.0864	6.38752	1490	6.20654	598.709	672	1197
Sample2191	60.03	30.2	Europe	Russia:St. Petersburg:Primorsky	forest: temperate coniferous forest biome	Continental	4.88333	6.35	32.4475	0.8436	41	52.8	5.5	1733		0.0579682	13	2.47843	897.244	626	741
Sample2201	37.9	14.5	Europe	Italy:Messina:Portella dell'Obolo	forest: temperate broadleaf forest biome	Temperate	9.62083	5.99167	53.882	0.561	14	39.7	6.1	857	43.0864	6.38752	1490	6.20654	598.709	672	1197
Sample2202	37.87	14.02	Europe	Italy:Palermo:Monte Mufara	forest: temperate broadleaf forest biome	Temperate	8.63333	6	51.349	0.5879	18	35.1	6.3	831	34.0029	6.42481	1619	6.26405	638.387	713	1212
Sample2213	37.87	14.02	Europe	Italy:Palermo:Monte Mufara	forest: temperate broadleaf forest biome	Temperate	8.63333	6	51.349	0.5879	18	35.1	6.3	831	34.0029	6.42481	1619	6.26405	638.387	713	1212
Sample2214	37.86	14.04	Europe	Italy:Palermo:Monte Daino	forest: temperate broadleaf forest biome	Temperate	8.86667	6.16667	51.187	0.588	18	37.4	6.3	796	30.8118	7.56126	1483	6.26405	637.806	704	1197
Sample2263	59.44	8.55	Europe	Norway:Vigdesja	forest: temperate coniferous forest biome	Continental	4.52917	8.39167	27.2179	1.4146	15	57.2	5.1	1625		5.65937	369	2.99085	729.821	974	688
Sample2264	59.82	8.32	Europe	Norway:Skinnarbu	forest: temperate broadleaf forest biome	Continental	1.46667	7.48333	24.0173	1.4514	28	62.1	5.1	1918		2.075	925	3.2	722.99	893	615
Sample2265	60.64	5.21	Europe	Norway:Seim	forest: temperate broadleaf forest biome	Temperate	7.5125	5.30833	31.0355	2.9469		53.3	5		32.17	6.29437	15	2.70327	471.078	2046	694
Sample2266	60.92	5.49	Europe	Norway:Hogsvaer	grassland: temperate grassland biome	Continental	5.65417	4.70833	34.7917	5.4914	12	54.2	4.4	2410		6.61306	305	2.70327	525.722	3601	655
Sample2267	61.32	5.78	Europe	Norway:Sande	forest: subpolar coniferous forest biome	Continental	6.63333	4.8	37.8079	3.5106	30	55.2	4.6	2040		6.0425	116	2.75555	556.717	2404	684
Sample2268	61.64	6.52	Europe	Norway:Klakegg	grassland: temperate grassland biome	Continental	4.14167	4.93333	34.8786	3.3175	14	55.9	5	2404			0	2.90196	565.673	2050	617
Sample2269	61.87	6.8	Europe	Norway:Loen	forest: temperate broadleaf forest biome	Continental										4.83507	1	2.90196
Sample2270	61.93	7.24	Europe	Norway:Folva	forest: temperate broadleaf forest biome	Continental	3.62917	5.40833	36.1946	2.3555	18	56.2	5	1762		29.1209	464	3.1268	559.389	1403	595
Sample2273	62.03	7.32	Europe	Norway:Djupevatn	tundra biome	Polar/Montane	0.233333	4.7	33.6971	3.3551	21	53.7		1943			0	2.78693	557.161	1611	480
Sample2274	62.37	9.64	Europe	Norway:Nedstavoll	forest: temperate broadleaf forest biome	Continental	0.4625	6.95833	36.6991	1.0399	19	50.7	4.9	2083		14.3937	788	3.05882	648.968	569	547
Sample2275	61.73	10.9	Europe	Norway:Atna	forest: subpolar coniferous forest biome	Continental	1.37083	8.575	42.2566	0.9136	17	47.3	4.9	1790		7.32526	648	2.99085	815.153	544	595
Sample2276	60.27	11.1	Europe	Norway:Sundby	grassland: temperate grassland biome	Continental	4.4375	8.19167	24.0284	1.1295	22	59.9	5.1	1839		0.506389	206	2.77124	797.568	788	697
Sample2277	61.83	23.35	Europe	Finland:Laurilanper?40		Continental	3.43333	8.36667	29.6975	1.0373	14	32.2	4.8	2663		0.106444	118	2.4	861.778	664	640
Sample2278	61.83	23.35	Europe	Finland:Laurilanper?40		Continental	3.43333	8.36667	29.6975	1.0373	14	32.2	4.8	2663		0.106444	118	2.4	861.778	664	640
Sample2279	63.4	23.86	Europe	Finland:Salmela	forest: subpolar coniferous forest biome	Continental	2.65	8.1	34.9292	0.8991	18	44.8	5.1	2330		0.132687	95	2.21699	886.474	554	616
Sample2280	63.4	23.9	Europe	Finland:Viiste	grassland: temperate grassland biome	Continental	2.64167	8.18333	34.6368	0.8988	22	45.9	5.1	2248		0.454107	97	2.21699	890.201	556	618
Sample2281	65.08	25.44	Europe	Finland:Ritaharju	forest: subpolar coniferous forest biome	Continental	2.04167	7.65	30.1504	0.8299	54	59.3	4.8	2332		0.23673	16	1.97124	939.054	509	613
Sample2282	65.14	25.43	Europe	Finland:Penttil?per?40		Continental	1.87083	7.74167	30.0137	0.8563	46	68.2	4.5	2472		0.644325	21	1.97124	940.335	519	606
Sample2283	51.91	39.46	Europe	Russia:VO:Bor	forest: temperate coniferous forest biome	Continental	5.90417	8.30833	28.5446	0.6124	26	35.9	5.6	893	28.7986	0.616706	129	3.817	1037.57	547	893
Sample2284	65.96	25.16	Europe	Finland:Kumpula	grassland: temperate grassland biome	Continental	0.6375	7.925	26.5086	1.1325	12	51.6	4.6	2549		0.584013	101	1.97124	969.543	636	561
Sample2285	66.35	25.44	Europe	Finland:Koskenranta	forest: subpolar coniferous forest biome	Continental	0.633333	7.5	28.0849	1.0809	24	60.5	4.6	2396		0.161929	93	1.93987	981.669	621	574
Sample2286	66.66	25.36	Europe	Finland:Rintala	grassland: temperate grassland biome	Continental	0.0958334	7.80833	31.0132	1.1055	18	62	4.7	2201		1.67057	163	1.93464	994.717	620	560
Sample2287	68.06	24.03	Europe	Finland:Pallastunturi	tundra biome	Continental	-3	8.76667	41.079	1.3543	9	52.7	5.1	1905			0	1.92418	967.57	592	437
[truncated: 1,201 more rows]
