# Supplementary material for: Massive overlap of soil-borne fungal pathogens and developed countries
Source: Research Square preprint supplement (doi:10.21203/rs.3.rs-7011517/v1), 2025-07-08
Supplement: Supplementary file 3 [file 6a60a9ada3f23aaa01615e70.xlsx]

## Sheet: Foglio1
RDA ordination ANOVA.cca
Variable	Df	Variance	F	Pr(>F)	Significance
AI	1	694742	30.3037	0.003	**
MAT	1	263626	11.499	0.001	***
PSEA	1	138589	6.0451	0.026	*
SOC	1	133579	5.8265	0.009	**
Soil_pH	1	107401	4.6847	0.017	*
Residual	2755	63161019
RDA ordination Envfit
Variable	RDA1	RDA2	r2	Pr(>r)	Significance
AI	0.92534	0.37914	0.0182	0.003	**
MAT	0.79118	0.61158	0.0208	0.001	***
PSEA	-0.96373	0.26687	0.0014	0.127
SOC	-0.87198	0.48953	0.0014	0.128
Soil_pH	-0.87873	-0.47731	0.0172	0.001	***
MDR	-0.69868	-0.71543	0.0025	0.031	*
HII	-0.96858	-0.24869	0.0017	0.101
Sand_.	-0.88813	0.4596	0.0007	0.415
Plant_cover	0.75509	0.65562	0.0366	0.001	***
Terrein_slope	-0.61265	-0.79035	0.0019	0.087	.
Elevation	-0.56225	-0.82697	0.0185	0.001	***
